# Supplementary material for: Enantioselective synthesis of tunable chiral pyridine–aminophosphine ligands and their applications in asymmetric hydrogenation
Source: Royal Society of Chemistry journal article supplement (doi:10.1039/c9ob00770a), 2019-01-01
Supplement: c9ob00770a1.pdf [file c9ob00770a1.pdf]

Supporting Information for

## **Enantioselective Synthesis of Tunable Chiral Pyridine–Aminophosphine Ligands and Their Application in Asymmetric Hydrogenation**

Youran Liu,<sup>a</sup> Fei Chen,<sup>a</sup> Yan-Mei He,<sup>a</sup> Chenghao Li,<sup>a</sup> and Qing-Hua Fan<sup>\*a,b</sup>

<sup>a</sup>Beijing National Laboratory for Molecular Sciences, CAS Key Laboratory of Molecular Recognition and Function, Institute of Chemistry, Chinese Academy of Sciences (CAS), and University of Chinese Academy of Sciences, Beijing 100190, P. R. China; E-mail: [fanqh@iccas.ac.cn](mailto:fanqh@iccas.ac.cn)

<sup>b</sup>Collaborative Innovation Center of Chemical Science and Engineering, Tianjin 300072, P. R. China.

### **Contents**

|                                                                                  |      |
|----------------------------------------------------------------------------------|------|
| 1. General information -----                                                     | S2   |
| 2. Optimization of conditions for asymmetric hydrogenation-----                  | S2   |
| 3. General procedure for the synthesis of 2-(pyridin-2-yl)quinolines -----       | S4   |
| 4. General procedure for asymmetric hydrogenation-----                           | S15  |
| 5. General procedure for the synthesis of P,N-ligands-----                       | S22  |
| 6. General procedure for the synthesis of Ir-P,N-catalysts-----                  | S26  |
| 7. General procedure for asymmetric hydrogenation of olefins-----                | S30  |
| 8. General procedure for the synthesis of benzoazepines and benzodiazepines ---- | S32  |
| 9. General procedure for asymmetric hydrogenation of cyclic imines-----          | S36  |
| 10. Determination of absolute configuration-----                                 | S47  |
| 11. References-----                                                              | S50  |
| 12. Copy of NMR spectra-----                                                     | S51  |
| 13. Copy of HPLC spectra -----                                                   | S134 |

## 1. General information

Unless otherwise noted, all experiments were carried out under an atmosphere of nitrogen using standard Schlenk techniques or in a nitrogen-filled glovebox.  $^1\text{H}$  NMR and  $^{13}\text{C}$  NMR spectras were recorded on Bruker Model Avance DMX 300 Spectrometer ( $^1\text{H}$  300 MHz and  $^{13}\text{C}$  75 MHz, respectively), Bruker Model Avance DMX 400 Spectrometer ( $^1\text{H}$  400 MHz and  $^{13}\text{C}$  100 MHz, respectively) and Bruker Model Avance DMX 500 Spectrometer ( $^1\text{H}$  500 MHz and  $^{13}\text{C}$  125 MHz, respectively). Chemical shifts ( $\delta$ ) were given in ppm and were referenced to residual solvent or TMS peaks. Optical rotations were measured with Rudolph Autopl VI polarimeter. High resolution mass spectras (P-ESI HRMS) were obtained on Thermo Fisher Q Exactive Mass Spectrometer. HPLC analyses were performed on a Varian Prostar 210 liquid chromatograph. The single crystal X-ray analyses were measured with MM007HF Saturn724+ and XtaLAB Synergy-R. All organic solvents were dried using standard, published methods and were distilled before use. All other chemicals were used as received from Aldrich or Acros without further purification. The Ru-catalysts,<sup>1</sup> 2-(pyridin-2-yl) quinolines,<sup>2</sup> P,N-ligands and Ir-catalysts,<sup>3</sup> benzoazepines and benzodiazepines<sup>6</sup> were synthesized according to the modified literature methods.

## 2. Optimization of conditions for asymmetric hydrogenation

All ruthenium catalysts used for this study were prepared according to the reported methods.<sup>1</sup>

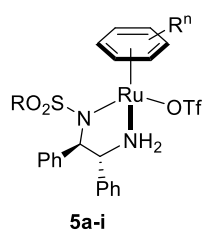

- (*R,R*)-**5a**:  $\text{R}^n\text{-Ar}$  = *p*-cymene;  $\text{R}$  = 4- $\text{CH}_3\text{C}_6\text{H}_4$ ;  
(*R,R*)-**5b**:  $\text{R}^n\text{-Ar}$  = *p*-cymene;  $\text{R}$  =  $\text{CH}_3$ ;  
(*R,R*)-**5c**:  $\text{R}^n\text{-Ar}$  = *p*-cymene;  $\text{R}$  =  $\text{C}_6\text{H}_5$ ;  
(*R,R*)-**5d**:  $\text{R}^n\text{-Ar}$  = *p*-cymene;  $\text{R}$  = 2,4,6-triisopropylphenyl;  
(*R,R*)-**5e**:  $\text{R}^n\text{-Ar}$  = *p*-cymene;  $\text{R}$  =  $\text{CF}_3$ ;  
(*R,R*)-**5f**:  $\text{R}^n\text{-Ar}$  = *p*-cymene;  $\text{R}$  = 4- $\text{CF}_3\text{C}_6\text{H}_4$ ;  
(*R,R*)-**5g**:  $\text{R}^n\text{-Ar}$  = benzene;  $\text{R}^1$  = 4- $\text{CH}_3\text{C}_6\text{H}_4$ ;  
(*R,R*)-**5h**:  $\text{R}^n\text{-Ar}$  = hexamethylbenzene;  $\text{R}$  = 4- $\text{CH}_3\text{C}_6\text{H}_4$ ;  
(*R,R*)-**5i**:  $\text{R}^n\text{-Ar}$  = hexamethylbenzene;  $\text{R}$  =  $\text{CH}_3$ ;

**Table S1.** Optimization of the reaction conditions for asymmetric hydrogenation of **6d**<sup>a</sup>

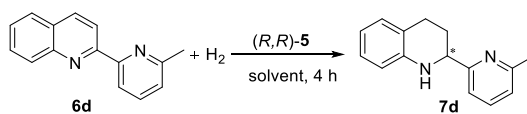

| entry | catalyst                  | solvent        | temp<br>(°C) | H <sub>2</sub><br>(atm) | conv.<br>(%) <sup>b</sup> | ee.<br>(%) <sup>c</sup> |
|-------|---------------------------|----------------|--------------|-------------------------|---------------------------|-------------------------|
| 1     | ( <i>R,R</i> )- <b>5a</b> | toulene        | 25           | 50                      | 70                        | 52                      |
| 2     | ( <i>R,R</i> )- <b>5a</b> | DCM            | 25           | 50                      | 90                        | 72                      |
| 3     | ( <i>R,R</i> )- <b>5a</b> | THF            | 25           | 50                      | 8                         | 68                      |
| 4     | ( <i>R,R</i> )- <b>5a</b> | MeOH           | 25           | 50                      | 72                        | 79                      |
| 5     | ( <i>R,R</i> )- <b>5a</b> | EtOH           | 25           | 50                      | 77                        | 86                      |
| 6     | ( <i>R,R</i> )- <b>5a</b> | <i>i</i> -PrOH | 25           | 50                      | >99                       | 87                      |
| 7     | ( <i>R,R</i> )- <b>5a</b> | <i>n</i> -BuOH | 25           | 50                      | 65                        | 87                      |
| 8     | ( <i>R,R</i> )- <b>5h</b> | <i>i</i> -PrOH | 25           | 30                      | 86                        | 97                      |
| 9     | ( <i>R,R</i> )- <b>5h</b> | <i>i</i> -PrOH | 25           | 10                      | 50                        | 95                      |
| 10    | ( <i>R,R</i> )- <b>5h</b> | <i>i</i> -PrOH | 50           | 50                      | >99                       | 93                      |

<sup>a</sup>Reaction conditions: substrate **6d** (0.2 mmol) in solvent (2.0 mL), Ru-catalyst **5** (2.0 mol %), H<sub>2</sub> (50 atm), stirred at 25 °C for 4 h. <sup>b</sup>The conversions were determined by <sup>1</sup>H NMR spectroscopy of the crude reaction mixtures. <sup>c</sup>The enantiomeric excesses were determined by HPLC with a chiral OB-H column.

### 3. General procedure for the synthesis of 2-(pyridin-2-yl)quinolines

#### (1) Compounds: **6a-c**

The corresponding quinolines **6a-c** were synthesized according to the previously reported procedures.<sup>2a-b</sup>

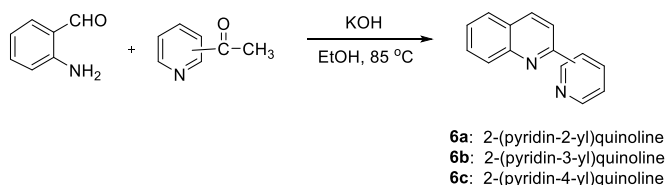

To a stirred solution of 2-aminobenzaldehyde (4.2 g, 0.035 mol) in EtOH (100 mL) at 25 °C was added acetylpyridine (5.0 g, 0.042 mol) and KOH (0.4 g, 0.007 mol). The reaction mixture was stirred at 85 °C for 3 h. After cooling to room temperature, the mixture was evaporated under reduced pressure. The residue was purified by silica gel column chromatography (eluent: ethyl acetate/petroleum=1/8, v/v) to give yellow solids **2a-c**. The analytical data of the products are summarized below.

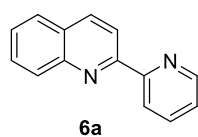

**2-(pyridin-2-yl)quinoline (6a):** (Known compound, see: R. Wang, H. Fan, W. Zhao and F. Li, *Org. Lett.* 2016, **18**, 3558); yellow solid, m.p. 98-100 °C, 72% yield; <sup>1</sup>H NMR (500 MHz, CDCl<sub>3</sub>): δ (ppm)

8.75 (d, *J* = 3.0 Hz, 1H), 8.67 (d, *J* = 8.0 Hz, 1H), 8.57 (d, *J* = 8.5 Hz, 1H), 8.29 (d, *J* = 8.5 Hz, 1H), 8.19 (d, *J* = 8.0 Hz, 1H), 7.90-7.85 (m, 2H), 7.74 (t, *J* = 7.5 Hz, 1H), 7.56 (t, *J* = 7.5 Hz, 1H), 7.37 (t, *J* = 5.5 Hz, 1H); <sup>13</sup>C NMR (125 MHz, CDCl<sub>3</sub>): δ (ppm) 156.5, 156.3, 149.3, 148.0, 137.1, 136.9, 129.9, 129.7, 128.4, 127.7, 126.9, 124.2, 122.0, 119.1.

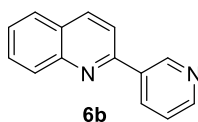

**2-(pyridin-3-yl)quinoline (6b):** (Known compound, see: L.-Y. Xi, R.-Y. Zhang, L. Zhang, S.-Y. Chen and X.-Q. Yu, *Org. Biomol. Chem.* 2015, **13**, 3942); yellow solid, m.p. 65-67 °C, 65% yield; <sup>1</sup>H

NMR (400 MHz, CDCl<sub>3</sub>): δ (ppm) 9.36 (d, *J* = 1.6 Hz, 1H), 8.70 (dd, *J*<sub>1</sub> = 4.4 Hz, *J*<sub>2</sub> = 1.2 Hz, 1H), 8.52-8.49 (m, 1H), 8.25 (d, *J* = 8.8 Hz, 1H), 8.17 (d, *J* = 8.4 Hz, 1H), 7.88-7.83 (m, 2H), 7.77-7.73 (m, 1H), 7.57-7.53 (m, 1H), 7.45 (dd, *J*<sub>1</sub> = 8.0 Hz, *J*<sub>2</sub> =



4.8 Hz, 1H);  $^{13}\text{C}$  NMR (100 MHz,  $\text{CDCl}_3$ ):  $\delta$  (ppm) 154.7, 150.3, 148.9, 148.5, 137.3, 135.2, 135.1, 130.1, 129.9, 127.7, 127.5, 126.9, 123.8, 118.6.

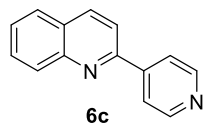

**2-(pyridin-4-yl)quinoline (6c):** (Known compound, see: L.-Y. Xi, R.-Y. Zhang, L. Zhang, S.-Y. Chen and X.-Q. Yu, *Org. Biomol. Chem.* 2015, **13**, 3942); yellow solid, m.p. 96-98 °C, 82% yield;  $^1\text{H}$  NMR (400 MHz,  $\text{CDCl}_3$ ):  $\delta$  (ppm) 8.78 (d,  $J = 5.2$  Hz, 2H), 8.28 (d,  $J = 8.4$  Hz, 1H), 8.19 (d,  $J = 8.8$  Hz, 1H), 8.06 (dd,  $J_1 = 4.4$  Hz,  $J_2 = 1.6$  Hz, 2H), 7.91-7.85 (m, 2H), 7.79-7.75 (m, 1H), 7.60-7.56 (m, 1H);  $^{13}\text{C}$  NMR (100 MHz,  $\text{CDCl}_3$ ):  $\delta$  (ppm) 154.5, 150.6, 148.4, 146.7, 137.3, 130.2, 130.1, 127.9, 127.6, 127.3, 121.7, 118.5.

## (2) Compound: **6d**

The corresponding 2-(pyridin-2-yl)quinoline **6d** was synthesized according to the previously reported procedure.<sup>2c</sup>

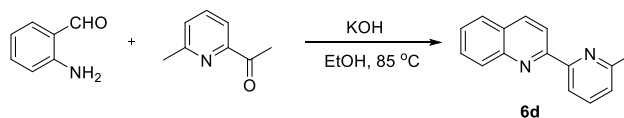

To a stirred solution of 2-aminobenzaldehyde (0.7 g, 0.006 mol) in EtOH (50 mL) at 25 °C was added acetylpyridine (1.2 eq, 0.007 mol) and KOH (0.2 eq, 0.001 mol). The reaction mixture was stirred at 85 °C for 3 h. After cooling to room temperature, the mixture was evaporated under reduced pressure. The residue was purified by silica gel column chromatography (eluent: ethyl acetate/petroleum=1/8, v/v) to give the yellow solid **6d**. The analytical data of the product are summarized below.

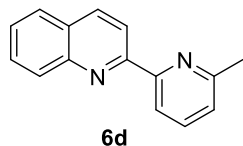

**2-(6-methylpyridin-2-yl)quinoline (6d):** (Known compound, see: J. Uenishi, T. Tanaka, K. Nishiwaki, W. Wakabayashi, S. Oae and H. Tsukube, *J. Org. Chem.* 1993, **58**, 4382); yellow

solid, m.p. 97-99 °C, 57% yield;  $^1\text{H}$  NMR (300 MHz,  $\text{CDCl}_3$ ):  $\delta$  (ppm) 8.61 (d,  $J = 8.7$  Hz, 1H), 8.46 (d,  $J = 7.8$  Hz, 1H), 8.27 (d,  $J = 8.7$  Hz, 1H), 8.19 (d,  $J = 8.4$  Hz, 1H), 7.85 (d,  $J = 8.1$  Hz, 1H), 7.79-7.70 (m, 2H), 7.57-7.52 (m, 1H), 7.23 (d,  $J = 7.5$  Hz, 1H), 2.68 (s, 3H);  $^{13}\text{C}$  NMR (75 MHz,  $\text{CDCl}_3$ ):  $\delta$  (ppm) 158.1, 156.6, 155.8, 148.0,

137.3, 136.9, 129.9, 129.6, 128.4, 127.7, 126.8, 123.7, 119.3, 119.0, 24.8.

### (3) Compounds: **6e-f**

The corresponding intermediates were synthesized according to the previously reported procedures.<sup>2d-e</sup>

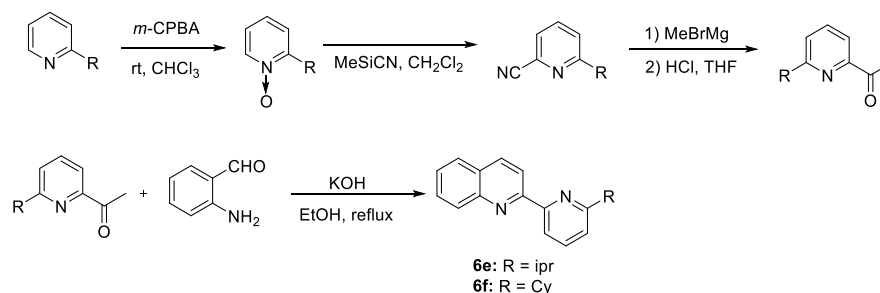

To a stirred solution of 2-substitued-pyridine in  $\text{CHCl}_3$  (0.5 M) at  $0^\circ\text{C}$  was added a solution of 3-chloroperoxybenzoic acid in  $\text{CHCl}_3$  (1.5 eq). The resultant yellow solution was stirred at  $0^\circ\text{C}$  for 10 min and stirred at room temperature for 3 h. Then, an aqueous solution of saturated sodium sulfite (50 mL) was added to quench the reaction, and then an aqueous solution of saturated sodium hydrogencarbonat (100 mL) was added to neutralize the reaction. The organic layer was removed, and the aqueous layer was extracted with EtOAc ( $3 \times 20$  mL). The extracts were combined, dried over  $\text{Na}_2\text{SO}_4$ , and evaporated under reduced pressure to yield the pyridine-1-oxide. And then to a stirred solution of pyridine-1-oxide in  $\text{CH}_2\text{Cl}_2$  (0.5 M) at  $25^\circ\text{C}$ , trimethylsilyl cyanide (1.3 eq) and dimethylcarbamyyl chloride (1.3 eq) were added. The reaction was stirred at  $25^\circ\text{C}$  for 12 h. Then, an aqueous solution of saturated sodium hydrogencarbonat (100 mL) was added to neutralize the reaction. The orgnic layer was removed, and the aqueous layer was extracted with EtOAc ( $3 \times 20$  mL). The extracts were combined, dried over  $\text{Na}_2\text{SO}_4$ , and evaporated under reduced pressure. The residue was purified by silica gel column chromatography (eluent: ethyl acetate/petroleum) to yield the corresponding cyanopyridine. And then to a stirred solution of cyanopyridine in dry THF (1.0 M) at  $-25^\circ\text{C}$  under nitrogen, a solution of 3.0 M methylmagnesium bromidein in diethyl ether (1.5 eq) were added. The reaction was stirred at  $-25^\circ\text{C}$  for 1 h and stirred at room temperature overnight until all of the cyanopyridine was consumed as indicated by TLC. Then, an aqueous

solution of hydrochloric acid (37%, 20 mL) at 0 °C was added to the reaction. The reaction mixture was stirred at 0 °C for 10 min and stirred at room temperature for 4 h, and then washed with aqueous solution of saturated sodium hydrogencarbonat. The organic layer was removed, and the aqueous layer was extracted with EtOAc (3 × 20 mL). The extracts were combined, dried over Na<sub>2</sub>SO<sub>4</sub>, and evaporated under reduced pressure. The residue was purified by silica gel column chromatography (eluent: ethyl acetate/petroleum) to yield the corresponding 2-acetylpyridine. And then to a stirred solution of 2-aminobenzyl aldehyde in EtOH (1.0 M) at 25 °C, 2-acetylpyridine (1.2 eq) and KOH (0.2 eq) were added. The reaction mixture was stirred at 85 °C for 3 h. After cooling to room temperature, the mixture was evaporated under reduced pressure. The residue was purified by silica gel column chromatography (eluent: ethyl acetate/petroleum) to give yellow solids **6e-f**. The analytical data of the products are summarized below.

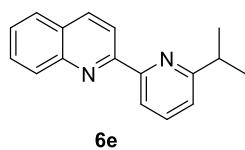

**2-(6-isopropylpyridin-2-yl)quinoline (6e):** (New compound); yellow solid, m.p. 49-50 °C, 65% yield; <sup>1</sup>H NMR (500 MHz, CDCl<sub>3</sub>): δ (ppm) 8.69 (d, *J* = 8.5 Hz, 1H), 8.48 (d, *J* = 8.0 Hz, 1H), 8.26 (d, *J* = 8.5 Hz, 1H), 8.19 (d, *J* = 8.5 Hz, 1H), 7.85 (d, *J* = 8.0 Hz, 1H), 7.78 (t, *J* = 7.8 Hz, 1H), 7.73 (t, *J* = 7.5 Hz, 1H), 7.54 (t, *J* = 7.3 Hz, 1H), 7.24 (d, *J* = 7.5 Hz, 1H), 3.19 (sep, *J* = 6.8 Hz, 1H), 1.41 (d, *J* = 7.0 Hz, 6H); <sup>13</sup>C NMR (125 MHz, CDCl<sub>3</sub>): δ (ppm) 166.8, 157.0, 155.4, 148.0, 137.3, 136.7, 129.9, 129.5, 128.4, 127.7, 126.7, 121.2, 119.4, 119.1, 36.5, 22.8. HRMS-ESI exact mass calcd. for C<sub>17</sub>H<sub>17</sub>N<sub>2</sub><sup>+</sup> ([M+H]<sup>+</sup>) requires m/z 249.13863, found m/z 249.13850.

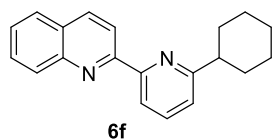

**2-(6-cyclohexylpyridin-2-yl)quinoline (6f):** (New compound); white solid, m.p. 37-38 °C, 53% yield; <sup>1</sup>H NMR (500 MHz, CDCl<sub>3</sub>): δ (ppm) 8.67 (d, *J* = 8.5 Hz, 1H), 8.46 (d, *J* = 7.5 Hz, 1H), 8.26 (d, *J* = 8.5 Hz, 1H), 8.17 (d, *J* = 8.5 Hz, 1H), 7.84 (d, *J* = 8.0 Hz, 1H), 7.78 (t, *J* = 7.8 Hz, 1H), 7.72 (t, *J* = 7.5 Hz, 1H), 7.54 (t, *J* = 7.3 Hz, 1H), 7.21 (d, *J* = 8.0 Hz, 1H), 2.85-2.80 (m, 1H), 2.08-2.05 (m, 2H), 1.92-1.89 (m, 2H), 1.81-1.79 (m, 1H),

1.70-1.62 (m, 2H), 1.52-1.44 (m, 2H), 1.38-1.37 (m, 1H);  $^{13}\text{C}$  NMR (125 MHz,  $\text{CDCl}_3$ ):  $\delta$  (ppm) 166.0, 157.0, 155.5, 148.1, 137.2, 136.7, 129.9, 129.5, 128.4, 127.7, 126.6, 121.5, 119.5, 119.1, 46.6, 33.1, 26.8, 26.4. HRMS-ESI exact mass calcd. for  $\text{C}_{20}\text{H}_{21}\text{N}_2^+$  ( $[\text{M}+\text{H}]^+$ ) requires  $m/z$  289.16993, found  $m/z$  289.16952.

#### (4) Compounds: **6g-j**

The corresponding intermediates were synthesized according to the previously reported procedures.<sup>2f</sup>

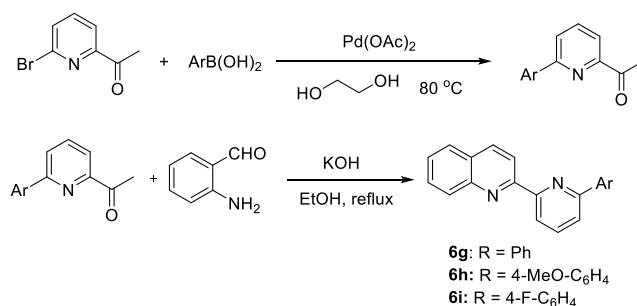

To a stirred solution of 2-acetyl-6-bromopyridine in ethylene glycol (0.5 M) at 25 °C was added corresponding boric acid (1.5 eq), palladium diacetate (0.5% eq) and tripotassium phosphate (2.0 eq). The reaction was stirred at 80 °C for 12 h. After cooling to room temperature, the organic layer was extracted with EtOAc (10 × 50 mL). The extracts were combined, and evaporated under reduced pressure. The residue was purified by silica gel column chromatography (eluent: ethyl acetate/petroleum) to yield the corresponding 2-acetylpyridine. And to a stirred solution of 2-aminobenzyl aldehyde in EtOH (1.0 M) at 25 °C, 2-acetylpyridine (1.2 eq) and KOH (0.2 eq) were added. The reaction mixture was stirred at 85 °C for 3 h. After cooling to room temperature, the mixture was evaporated under reduced pressure. The residue was purified by silica gel column chromatography (eluent: ethyl acetate/petroleum) to give yellow solids **6g-i**. The analytical data of the products are summarized below.

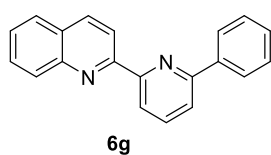

**2-(6-phenylpyridin-2-yl)quinoline (6g):** (Known compound, see: C. T. Carver and P. L. Diaconescu, *J. Am. Chem. Soc.* 2008, **130**, 7558); white solid, m.p. 121-123 °C, 40% yield;  $^1\text{H}$  NMR (500 MHz,  $\text{CDCl}_3$ ):  $\delta$  (ppm) 8.82 (d,  $J$  = 8.5 Hz, 1H), 8.65 (d,  $J$  = 7.5 Hz, 1H),

8.31 (d,  $J = 8.5$  Hz, 1H), 8.21 (d,  $J = 7.5$  Hz, 3H), 7.95 (t,  $J = 7.8$  Hz, 1H), 7.85 (dd,  $J_1 = 22.0$  Hz,  $J_2 = 8.0$  Hz, 2H), 7.75 (t,  $J = 7.5$  Hz, 1H), 7.58-7.53 (m, 3H), 7.48-7.45 (m, 1H),  $^{13}\text{C}$  NMR (100 MHz,  $\text{CDCl}_3$ ):  $\delta$  (ppm) 156.6, 156.4, 155.8, 147.8, 139.4, 137.9, 137.0, 129.8, 129.7, 129.2, 128.9, 128.5, 127.8, 127.1, 126.9, 120.8, 120.3, 119.4.

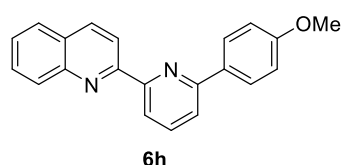

**2-(6-(4-methoxyphenyl)pyridin-2-yl)quinoline (6h):**

(New compound); yellow solid, m.p. 122-123 °C, 72% yield;  $^1\text{H}$  NMR (400 MHz,  $\text{CDCl}_3$ ):  $\delta$  (ppm) 8.80 (d,  $J =$

8.4 Hz, 1H), 8.59 (d,  $J = 7.6$  Hz, 1H), 8.30 (d,  $J = 8.8$  Hz, 1H), 8.21-8.15 (m, 3H), 7.92-7.86 (m, 2H), 7.77-7.72 (m, 2H), 7.58-7.54 (m, 1H), 7.06 (d,  $J = 8.8$  Hz, 2H), 3.90 (s, 3H),  $^{13}\text{C}$  NMR (100 MHz,  $\text{CDCl}_3$ ):  $\delta$  (ppm) 160.7, 156.6, 156.3, 155.9, 148.1, 137.8, 136.7, 132.2, 130.0, 129.6, 128.5, 128.4, 127.8, 126.8, 120.0, 119.5, 119.4, 114.3, 55.5. HRMS-ESI exact mass calcd. for  $\text{C}_{21}\text{H}_{17}\text{ON}_2^+$  ( $[\text{M}+\text{H}]^+$ ) requires  $m/z$  313.13354, found  $m/z$  313.13348.

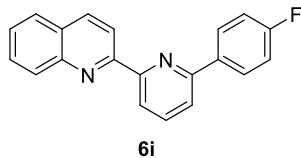

**2-(6-(4-fluorophenyl)pyridin-2-yl)quinoline (6i):** (New

compound); yellow solid, m.p. 135-137 °C, 78% yield;  $^1\text{H}$  NMR (500 MHz,  $\text{CDCl}_3$ ):  $\delta$  (ppm) 8.77 (d,  $J = 9.0$  Hz, 1H),

8.64 (d,  $J = 8.0$  Hz, 1H), 8.30 (d,  $J = 8.5$  Hz, 1H), 8.21-8.17 (m, 3H), 7.93 (t,  $J = 7.8$  Hz, 1H), 7.87 (d,  $J = 8.0$  Hz, 1H), 7.77-7.73 (m, 2H), 7.57 (t,  $J = 7.5$  Hz, 1H), 7.21 (t,  $J = 8.5$  Hz, 2H),  $^{13}\text{C}$  NMR (125 MHz,  $\text{CDCl}_3$ ):  $\delta$  (ppm) 163.7 (d,  $^1J_{\text{FC}} = 246.3$  Hz), 156.4, 156.1, 155.5, 148.1, 137.9, 136.8, 135.6 (d,  $^4J_{\text{FC}} = 2.5$  Hz), 130.0, 129.7, 128.9 (d,  $^3J_{\text{FC}} = 8.8$  Hz), 128.5, 127.8, 126.9, 120.4, 120.1, 119.2, 115.8 (d,  $^2J_{\text{FC}} = 22.5$  Hz). HRMS-ESI exact mass calcd. for  $\text{C}_{20}\text{H}_{14}\text{FN}_2^+$  ( $[\text{M}+\text{H}]^+$ ) requires  $m/z$  301.11355, found  $m/z$  301.11362.

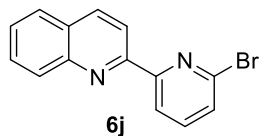

**2-(6-bromopyridin-2-yl)quinoline (6j):** (New compound); **6j**

was synthesized according to the procedures as compound

**6d**.<sup>2c</sup> yellow solid, m.p. 52-53 °C, 80% yield;  $^1\text{H}$  NMR (300 MHz,  $\text{CDCl}_3$ ):  $\delta$  (ppm) 8.65 (dd,  $J_1 = 7.8$  Hz,  $J_2 = 0.9$  Hz, 1H), 8.56 (d,  $J = 8.7$  Hz, 1H), 8.28 (d,  $J = 8.7$  Hz,

1H), 8.15 (d,  $J = 8.4$  Hz, 1H), 7.86 (d,  $J = 8.1$  Hz, 1H), 7.77-7.70 (m, 2H), 7.59-7.53 (m, 2H);  $^{13}\text{C}$  NMR (100 MHz,  $\text{CDCl}_3$ ):  $\delta$  (ppm) 157.5, 154.6, 147.8, 141.7, 139.3, 137.2, 129.9, 129.9, 128.6, 128.5, 127.8, 127.3, 120.7, 119.2. HRMS-ESI exact mass calcd. for  $\text{C}_{14}\text{H}_{10}\text{BrN}_2^+$  ( $[\text{M}+\text{H}]^+$ ) requires  $m/z$  285.00219, found  $m/z$  285.00235.

#### (5) Compounds: **6k-o**

First, the corresponding 2-aminobenzoic acids were synthesized according to the previously reported procedures.<sup>2g-h</sup>

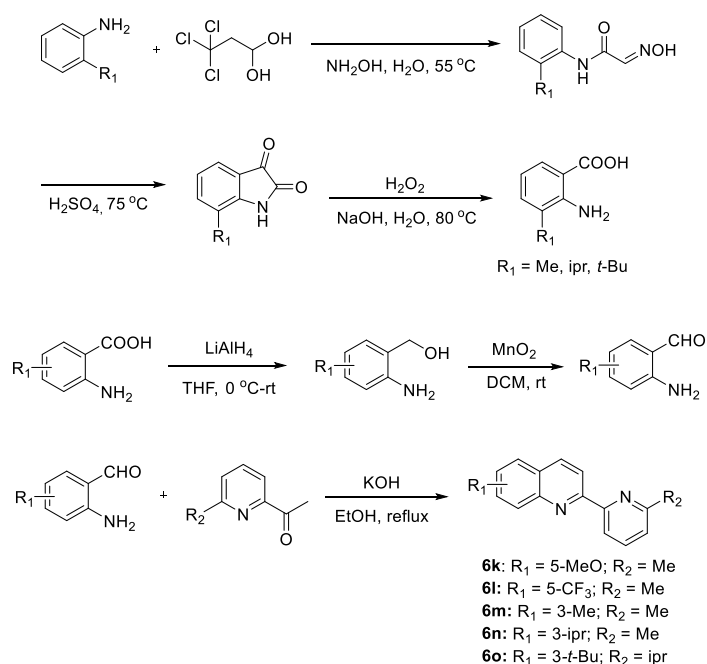

To a stirred solution of aniline in  $\text{H}_2\text{O}$  (0.1 M) at 25 °C, chloral hydrate solution (1.2 eq), hydroxylamine hydrochloride (3.6 eq), sodium sulfate (1.0 eq) and hydrochloric acid (12.5 mL) were added. The reaction was stirred at 55 °C for 12 h. After cooling to room temperature, the reaction mixture was filtered, and the filter cake was washed with water ( $3 \times 50$  mL) to yield yellow solid. To the solid at 55 °C was added  $\text{H}_2\text{SO}_4$  (45.0 mL, 18.4 M) dropwise during 0.5 h. Then, the reaction was stirred at 80 °C for 10 min. After cooling to room temperature and pouring into ice water for 30 min, the mixture was filtered. The obtained filter cake was washed with water ( $3 \times 50$  mL) to yield brown solid. To a stirred solution of brown solid in saturated sodium hydroxide at 80 °C was added  $\text{H}_2\text{O}_2$  (33.0 mL, 15%) dropwise during 0.5 h. The reaction was stirred at 80 °C for 5 h. After cooling to room temperature and adding

activated carbon, the reaction mixture was washed with aqueous solution of hydrochloric acid, filtered, and washed with EtOH. The organic layers were combined, and evaporated under reduced pressure to yield the corresponding 2-aminobenzoic acid.

To a stirred suspension of lithium aluminium hydride in dry THF (0.5 M, 1.5 eq) at 0 °C under nitrogen was added a solution of 2-aminobenzoic acid (1.0 eq) in dry THF (1.0 M). The reaction was then stirred at 25 °C for another 12 h. Then, sodium sulfate decahydrate (1.0 M) was added to quench the reaction, filtered with celite, and the filtrate was evaporated under reduced pressure. The residue was purified by silica gel column chromatography (eluent: ethyl acetate/petroleum) to yield the corresponding 2-aminobenzyl alcohol. And to a stirred solution of 2-aminobenzyl alcohol in DCM (1.0 M) at 25 °C was added manganese dioxide (5.0 eq). The reaction was stirred at 25 °C for 12 h, filtered with celite, and the filtrate was evaporated under reduced pressure (< 25 °C) to yield the corresponding 2-aminobenzyl aldehyde. And to a stirred solution of 2-aminobenzyl aldehyde in EtOH (1.0 M) at 25 °C was added 2-acetylpyridine (1.2 eq) and KOH (0.2 eq). The reaction mixture was stirred at 85 °C for 3 h. After cooling to room temperature, the mixture was evaporated under reduced pressure. The residue was purified by silica gel column chromatography (eluent: ethyl acetate/petroleum) to give yellow solids **6k-o**. The analytical data of the products are summarized below.

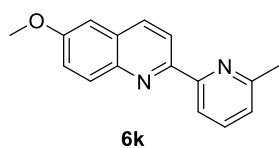

**6-methoxy-2-(6-methylpyridin-2-yl)quinoline (6k):** (New compound); white solid, m.p. 163-164 °C, 58% yield; <sup>1</sup>H NMR (500 MHz, CDCl<sub>3</sub>): δ (ppm) 8.63 (d, *J* = 9.0 Hz, 1H), 8.55 (d, *J* = 8.0 Hz, 1H), 8.23 (d, *J* = 8.5 Hz, 1H), 7.75 (t, *J* = 7.8 Hz, 1H), 7.68 (d, *J* = 8.0 Hz, 1H), 7.57 (d, *J* = 7.0 Hz, 1H), 7.43 (t, *J* = 7.5 Hz, 1H), 7.21 (d, *J* = 7.5 Hz, 1H), 2.92 (s, 3H), 2.68 (s, 3H); <sup>13</sup>C NMR (125 MHz, CDCl<sub>3</sub>): δ (ppm) 157.9, 156.3, 155.1, 147.0, 137.8, 137.1, 137.0, 129.6, 128.3, 126.5, 125.7, 123.5, 118.9, 118.7, 24.8, 18.0. HRMS-ESI exact mass calcd. for C<sub>16</sub>H<sub>15</sub>ON<sub>2</sub><sup>+</sup> ([M+H]<sup>+</sup>) requires *m/z* 251.11789, found *m/z* 251.11751.

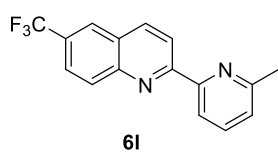

**2-(6-methylpyridin-2-yl)-6-(trifluoromethyl)quinoline (6l):**

(New compound); white solid, m.p. 153-154 °C, 54% yield; <sup>1</sup>H

NMR (500 MHz, CDCl<sub>3</sub>): δ (ppm) 8.74 (d, *J* = 8.5 Hz, 1H),

8.48 (d, *J* = 8.0 Hz, 1H), 8.36 (d, *J* = 8.5 Hz, 1H), 8.28 (d, *J* = 9.0 Hz, 1H), 8.17 (s,

1H), 7.89 (dd, *J*<sub>1</sub> = 9.0 Hz, *J*<sub>2</sub> = 1.5 Hz, 1H), 7.79 (t, *J* = 7.8 Hz, 1H), 7.28-7.26 (m,

1H), 2.70 (s, 3H); <sup>13</sup>C NMR (125 MHz, CDCl<sub>3</sub>): δ (ppm) 158.4, 158.2, 155.0, 149.0,

137.6, 131.0, 128.5 (q, <sup>2</sup>*J*<sub>FC</sub> = 32.5 Hz), 127.3, 125.7 (q, <sup>3</sup>*J*<sub>FC</sub> = 4.6 Hz), 125.3, 125.3,

124.4, 124.2 (q, <sup>1</sup>*J*<sub>FC</sub> = 270.9 Hz), 120.6, 119.4, 24.7. HRMS-ESI exact mass calcd.

for C<sub>16</sub>H<sub>12</sub>F<sub>3</sub>N<sub>2</sub><sup>+</sup> ([M+H]<sup>+</sup>) requires m/z 289.09471, found m/z 289.09460.

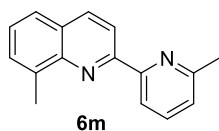

**8-methyl-2-(6-methylpyridin-2-yl)quinoline (6m):** (New

compound); yellow solid, m.p. 64-66 °C, 48% yield; <sup>1</sup>H NMR (500

MHz, CDCl<sub>3</sub>): δ (ppm) 8.63 (d, *J* = 9.0 Hz, 1H), 8.55 (d, *J* = 8.0

Hz, 1H), 8.23 (d, *J* = 8.5 Hz, 1H), 7.75 (t, *J* = 7.8 Hz, 1H), 7.68 (d, *J* = 8.0 Hz, 1H),

7.58 (d, *J* = 7.0 Hz, 1H), 7.43 (t, *J* = 7.5 Hz, 1H), 7.21 (d, *J* = 7.5 Hz, 1H), 2.92 (s,

3H), 2.68 (s, 3H); <sup>13</sup>C NMR (125 MHz, CDCl<sub>3</sub>): δ(ppm) 157.9, 156.3, 155.1, 147.0,

137.8, 137.1, 137.0, 129.6, 128.3, 126.5, 125.7, 123.5, 118.9, 118.7, 24.8, 18.0.

HRMS-ESI exact mass calcd. for C<sub>16</sub>H<sub>15</sub>N<sub>2</sub><sup>+</sup> ([M+H]<sup>+</sup>) requires m/z 235.12298, found

m/z 235.12282.

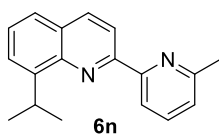

**8-isopropyl-2-(6-methylpyridin-2-yl)quinoline (6n):** (New

compound); yellow oil, 32% yield; <sup>1</sup>H NMR (500 MHz, CDCl<sub>3</sub>): δ

(ppm) 8.61 (d, *J* = 8.5 Hz, 1H), 8.52 (d, *J* = 8.0 Hz, 1H), 8.18 (d, *J*

= 8.5 Hz, 1H), 7.69 (t, *J* = 7.5 Hz, 1H), 7.62 (d, *J* = 7.5 Hz, 1H), 7.57 (d, *J* = 7.0 Hz,

1H), 7.45 (t, *J* = 7.5 Hz, 1H), 7.13 (d, *J* = 7.5 Hz, 1H), 4.51-4.46 (m, 1H), 2.64 (s, 3H),

1.45 (d, *J* = 7.0 Hz, 6H); <sup>13</sup>C NMR (125 MHz, CDCl<sub>3</sub>): δ(ppm) 157.7, 156.3, 154.8,

147.7, 145.7, 137.0, 128.4, 126.7, 125.4, 125.2, 123.4, 118.8, 118.5, 27.8, 24.8, 23.7.

HRMS-ESI exact mass calcd. for C<sub>18</sub>H<sub>19</sub>N<sub>2</sub><sup>+</sup> ([M+H]<sup>+</sup>) requires m/z 263.15428, found

m/z 263.15404.



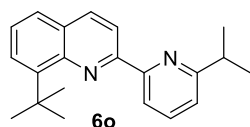

**8-(*t*-butyl)-2-(6-isopropylpyridin-2-yl)quinoline (6o):** (New compound); oil, 42% yield;  $^1\text{H}$  NMR (400 MHz,  $\text{CDCl}_3$ ):  $\delta$  (ppm) 8.72 (d,  $J = 8.8$  Hz, 1H), 8.51 (dd,  $J_1 = 8.0$  Hz,  $J_2 = 0.8$  Hz, 1H), 8.24 (d,  $J = 8.8$  Hz, 1H), 7.82 (t,  $J = 7.8$  Hz, 1H), 7.72-7.69 (m, 2H), 7.46 (t,  $J = 7.8$  Hz, 1H), 7.24 (d,  $J = 7.6$  Hz, 1H), 3.25-3.16 (m, 1H), 1.80 (s, 9H), 1.44 (d,  $J = 7.2$  Hz, 6H);  $^{13}\text{C}$  NMR (100 MHz,  $\text{CDCl}_3$ ):  $\delta$  (ppm) 166.6, 156.0, 153.9, 148.3, 146.7, 137.4, 137.3, 129.3, 126.7, 126.2, 126.2, 120.9, 119.0, 118.1, 36.8, 36.5, 31.5, 22.9. HRMS-ESI exact mass calcd. for  $\text{C}_{21}\text{H}_{25}\text{N}_2^+$  ( $[\text{M}+\text{H}]^+$ ) requires  $m/z$  305.20123, found  $m/z$  305.20084.

#### (6) Compound: **6p**

The corresponding intermediates were synthesized according to the previously reported procedures.<sup>2i</sup>

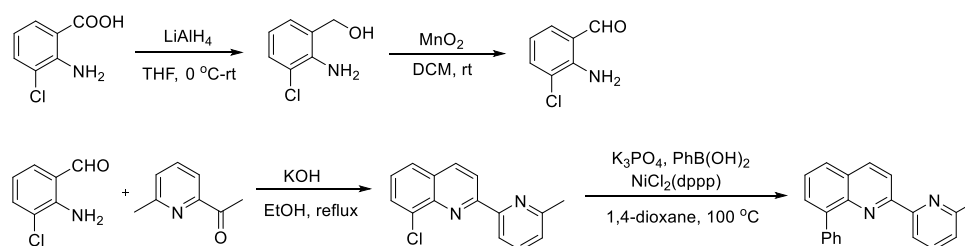

To a stirred suspension of lithium aluminium hydride in dry THF (0.5 M, 1.5 eq) at 0 °C under nitrogen was added a solution of 2-aminobenzoic acid (1.0 eq) in dry THF (1.0 M). The reaction was stirred at 25 °C for 12 h. Then, sodium sulfate decahydrate (1.0 M) was added to quench the reaction, filtered with celite, and the filtrate was evaporated under reduced pressure. The residue was purified by silica gel column chromatography (eluent: ethyl acetate/petroleum) to yield the corresponding 2-aminobenzyl alcohol. And to a stirred solution of 2-aminobenzyl alcohol in DCM (1.0 M) at 25 °C was added manganese dioxide (5.0 eq). The reaction was stirred at 25 °C for 12 h, filtered with celite, and the filtrate was evaporated under reduced pressure (< 25 °C) to yield the corresponding 2-aminobenzyl aldehyde. And to a stirred solution of 2-aminobenzyl aldehyde in EtOH (1.0 M) at 25 °C was added

2-acetylpyridine (1.2 eq) and KOH (0.2 eq). The reaction mixture was stirred at 85 °C for 3 h. After cooling to room temperature, the mixture was evaporated under reduced pressure. The residue was purified by silica gel column chromatography (eluent: ethyl acetate/petroleum) to give a yellow solid. To a stirred solution of yellow solid in 1,4-dioxane (0.1 M) at 25 °C was added phenylboronic acid (2.0 eq), K<sub>3</sub>PO<sub>4</sub> (3.0 eq) and NiCl<sub>2</sub>(dppp) (1% eq). The reaction was stirred at 100 °C for 12 h. After cooling to room temperature, the organic layer was evaporated under reduced pressure. The residue was purified by silica gel column chromatography (eluent: ethyl acetate/petroleum = 1:50, v/v) to yield the white solid.

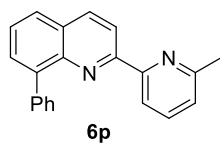

**2-(6-methylpyridin-2-yl)-8-phenylquinoline (6p):** (New compound); white solid, m.p. 105-107 °C, 40% yield; <sup>1</sup>H NMR (400 MHz, CDCl<sub>3</sub>): δ (ppm) 8.70 (d, *J* = 8.8 Hz, 1H), 8.33-8.27 (m, 2H),

7.89-7.80 (m, 4H), 7.68-7.54 (m, 4H), 7.49-7.45 (m, 1H), 7.17 (d, *J* = 7.6 Hz, 1H), 2.67 (s, 3H); <sup>13</sup>C NMR (100 MHz, CDCl<sub>3</sub>): δ (ppm) 157.7, 155.9, 155.8, 145.4, 140.9, 139.7, 137.2, 137.1, 131.3, 130.3, 128.8, 127.8, 127.4, 127.3, 126.6, 123.6, 119.1, 118.7, 24.8. HRMS-ESI exact mass calcd. for C<sub>21</sub>H<sub>17</sub>N<sub>2</sub><sup>+</sup> ([M+H]<sup>+</sup>) requires *m/z* 297.13863, found *m/z* 297.13858.

#### 4. General procedure for asymmetric hydrogenation

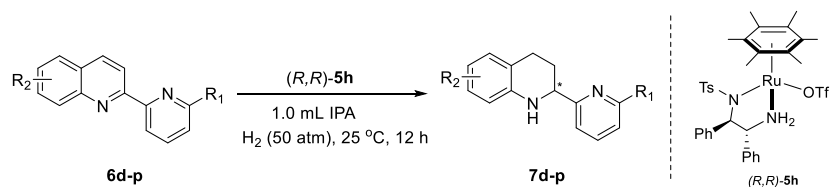

Typical procedure: A 30 mL glass-lined stainless-steel reactor equipped with a magnetic stirrer bar was charged with substrates **6** (0.2 mmol) and catalyst (*R,R*)-**5h** (0.004 mmol) in 2.0 mL IPA under N<sub>2</sub> atmosphere in a glove box. The autoclave was closed, and the final pressure of the hydrogen gas was adjusted to 50 atm after purging the autoclave with hydrogen gas several times. The mixture was stirred at room temperature for 12 h. Then the hydrogen gas was carefully released and the conversions were determined by <sup>1</sup>H NMR. The reaction mixture was filtered through a short pad of silica eluted with EA and PE to give the isolated pure product. The enantiomeric excesses of the product were determined by HPLC with a chiral column.

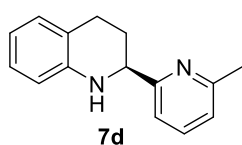

**(S)-2-(6-methylpyridin-2-yl)-1,2,3,4-tetrahydroquinoline (7d):**

(New compound); pale yellow oil, 92% yield, 98% ee;  $[\alpha]_D^{20} = -104.0$  ( $c = 0.25$ , CHCl<sub>3</sub>); <sup>1</sup>H NMR (400 MHz, CDCl<sub>3</sub>):  $\delta$  (ppm)

7.57 (t,  $J = 7.8$  Hz, 1H), 7.24 (d,  $J = 8.0$  Hz, 1H), 7.06-6.98 (m, 3H), 6.66-6.61 (m, 2H), 4.57 (dd,  $J_1 = 8.8$  Hz,  $J_2 = 3.6$  Hz, 1H), 2.95-2.87 (m, 1H), 2.72-2.65 (m, 1H), 2.58 (s, 3H), 2.29-2.23 (m, 1H), 2.05-1.95 (m, 1H); <sup>13</sup>C NMR (100 MHz, CDCl<sub>3</sub>):  $\delta$  (ppm) 162.5, 157.8, 144.3, 137.3, 129.3, 127.1, 121.9, 121.2, 117.6, 117.3, 114.6, 56.9, 28.9, 26.1, 24.5. HRMS-ESI exact mass calcd. for C<sub>15</sub>H<sub>17</sub>N<sub>2</sub><sup>+</sup> ( $[M+H]^+$ ) requires  $m/z$  225.13863, found  $m/z$  225.13826.

The enantiomeric excess was determined by HPLC on Chiralcel OB-H column (hexane : isopropanol = 95 : 5, flowing rate = 1.0 mL/min, 25 °C, UV detection at  $\lambda = 254$  nm),  $t_{R1} = 10.6$  min (minor),  $t_{R2} = 12.8$  min (major).

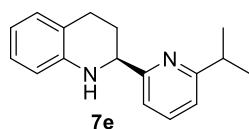

**(S)-2-(6-isopropylpyridin-2-yl)-1,2,3,4-tetrahydroquinoline**

**(7e):** (New compound); pale yellow oil, 90% yield, 97% ee;

$[\alpha]_D^{20} = -165.0$  ( $c = 0.25$ ,  $\text{CHCl}_3$ );  $^1\text{H}$  NMR (500 MHz,  $\text{CDCl}_3$ ):  $\delta$  (ppm) 7.59 (t,  $J = 7.8$  Hz, 1H), 7.21 (d,  $J = 8.0$  Hz, 1H), 7.07-6.98 (m, 3H), 6.65-6.62 (m, 2H), 4.55 (dd,  $J_1 = 9.0$  Hz,  $J_2 = 3.0$  Hz, 1H), 3.09-3.06 (m, 1H), 2.96-2.89 (m, 1H), 2.73-2.68 (m, 1H), 2.29-2.25 (m, 1H), 2.00-1.95 (m, 1H), 1.31 (d,  $J = 7.0$  Hz, 6H);  $^{13}\text{C}$  NMR (125 MHz,  $\text{CDCl}_3$ ):  $\delta$  (ppm) 166.8, 161.9, 144.5, 137.2, 129.3, 127.0, 121.3, 118.8, 117.8, 117.2, 114.6, 56.8, 36.4, 28.9, 26.4, 22.8. HRMS-ESI exact mass calcd. for  $\text{C}_{17}\text{H}_{21}\text{N}_2^+$  ( $[\text{M}+\text{H}]^+$ ) requires  $m/z$  253.16993, found  $m/z$  253.16977.

The enantiomeric excess was determined by HPLC on Chiralcel OB-H column (hexane : isopropanol = 95 : 5, flowing rate = 1.0 mL/min, 25 °C, UV detection at  $\lambda = 254$  nm),  $t_{R1} = 6.5$  min (minor),  $t_{R2} = 7.5$  min (major).

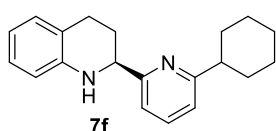

**(S)-2-(6-cyclohexylpyridin-2-yl)-1,2,3,4-tetrahydroquinoline**

**(7f)**: (New compound); pale yellow oil, 91% yield, 96% ee;

$[\alpha]_D^{20} = -124.8$  ( $c = 0.25$ ,  $\text{CHCl}_3$ );  $^1\text{H}$  NMR (500 MHz,  $\text{CDCl}_3$ ):

$\delta$  (ppm) 7.59 (t,  $J = 7.8$  Hz, 1H), 7.21 (d,  $J = 7.5$  Hz, 1H), 7.05-6.98 (m, 3H), 6.66-6.62 (m, 2H), 4.65 (s, 1H), 4.56-4.54 (m, 1H), 2.95-2.89 (m, 1H), 2.73-2.68 (m, 2H), 2.29-2.24 (m, 1H), 2.01-1.94 (m, 3H), 1.87-1.84 (m, 2H), 1.77-1.75 (m, 1H), 1.54-1.39 (m, 4H), 1.32-1.25 (m, 1H);  $^{13}\text{C}$  NMR (125 MHz,  $\text{CDCl}_3$ ):  $\delta$  (ppm) 166.0, 162.0, 144.5, 137.1, 129.3, 127.0, 121.3, 119.2, 117.8, 117.2, 114.6, 56.9, 46.6, 33.2, 33.1, 28.9, 26.7, 26.3. HRMS-ESI exact mass calcd. for  $\text{C}_{20}\text{H}_{25}\text{N}_2^+$  ( $[\text{M}+\text{H}]^+$ ) requires  $m/z$  293.20123, found  $m/z$  293.20093.

The enantiomeric excess was determined by HPLC on Chiralcel AD-H column (hexane : isopropanol = 95 : 5, flowing rate = 1.0 mL/min, 25 °C, UV detection at  $\lambda = 254$  nm),  $t_{R1} = 6.5$  min (minor),  $t_{R2} = 7.1$  min (major).

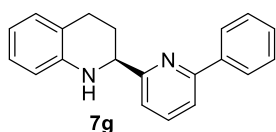

**(S)-2-(6-phenylpyridin-2-yl)-1,2,3,4-tetrahydroquinoline**

**(7g)**: (New compound); yellow oil, 90% yield, 96% ee;  $[\alpha]_D^{20}$

$= -159.0$  ( $c = 0.25$ ,  $\text{CHCl}_3$ );  $^1\text{H}$  NMR (500 MHz,  $\text{CDCl}_3$ ):  $\delta$

(ppm) 8.02 (d,  $J = 7.5$  Hz, 2H), 7.72 (t,  $J = 7.8$  Hz, 1H), 7.62 (d,  $J = 8.0$  Hz, 1H), 7.49-7.40 (m, 3H), 7.34 (d,  $J = 8.0$  Hz, 1H), 7.05-7.00 (m, 2H), 6.67-6.64 (m, 2H),

4.72 (s, 1H), 4.66 (dd,  $J_1 = 9.0$  Hz,  $J_2 = 3.5$  Hz, 1H), 2.96-2.90 (m, 1H), 2.75-2.70 (m, 1H), 2.35-2.29 (m, 1H), 2.13-2.05 (m, 1H);  $^{13}\text{C}$  NMR (100 MHz,  $\text{CDCl}_3$ ):  $\delta$  (ppm) 162.9, 156.7, 144.3, 139.5, 137.5, 129.4, 129.1, 128.9, 127.1, 121.3, 119.0, 118.9, 117.3, 114.6, 56.9, 28.7, 26.2. HRMS-ESI exact mass calcd. for  $\text{C}_{20}\text{H}_{19}\text{N}_2^+$  ( $[\text{M}+\text{H}]^+$ ) requires  $m/z$  287.15428, found  $m/z$  287.15387.

The enantiomeric excess was determined by HPLC on Chiralcel AD-H column (hexane : isopropanol = 95 : 5, flowing rate = 1.0 mL/min, 25 °C, UV detection at  $\lambda = 254$  nm),  $t_{\text{R}1} = 23.7$  min (minor),  $t_{\text{R}2} = 30.6$  min (major).

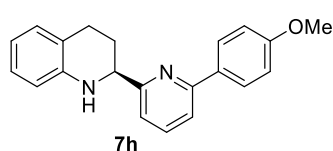

**(S)-2-(6-(4-methoxyphenyl)pyridin-2-yl)-1,2,3,4-tetrahydroquinoline (7h):** (New compound); colorless oil, 83% yield, 96% ee;  $[\alpha]_{\text{D}}^{20} = -104.8$  ( $c = 0.25$ ,  $\text{CHCl}_3$ );  $^1\text{H}$

NMR (500 MHz,  $\text{CDCl}_3$ ):  $\delta$  (ppm) 7.99 (d,  $J = 9.0$  Hz, 2H), 7.69 (t,  $J = 7.8$  Hz, 1H), 7.56 (d,  $J = 7.5$  Hz, 1H), 7.29 (d,  $J = 7.5$  Hz, 1H), 7.05-6.99 (m, 4H), 6.67-6.64 (m, 2H), 4.64 (dd,  $J_1 = 9.0$  Hz,  $J_2 = 3.5$  Hz, 1H), 3.87 (s, 3H), 2.95-2.90 (m, 1H), 2.76-2.70 (m, 1H), 2.33-2.29 (m, 1H), 2.12-2.06 (m, 1H);  $^{13}\text{C}$  NMR (125 MHz,  $\text{CDCl}_3$ ):  $\delta$  (ppm) 162.6, 160.6, 156.4, 144.4, 137.5, 132.1, 129.4, 128.4, 127.1, 121.4, 118.3, 118.2, 117.3, 114.6, 114.3, 56.9, 55.5, 28.7, 26.2. HRMS-ESI exact mass calcd. for  $\text{C}_{21}\text{H}_{21}\text{ON}_2^+$  ( $[\text{M}+\text{H}]^+$ ) requires  $m/z$  317.16484, found  $m/z$  317.16479.

The enantiomeric excess was determined by HPLC on Chiralcel OB-H column (hexane : isopropanol = 80 : 20, flowing rate = 1.0 mL/min, 25 °C, UV detection at  $\lambda = 254$  nm),  $t_{\text{R}1} = 52.2$  min (minor),  $t_{\text{R}2} = 91.4$  min (major).

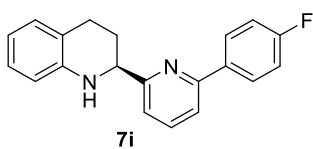

**(S)-2-(6-(4-fluorophenyl)pyridin-2-yl)-1,2,3,4-tetrahydroquinoline (7i):** (New compound); colorless oil, 93% yield, 97% ee;  $[\alpha]_{\text{D}}^{20} = -127.0$  ( $c = 0.25$ ,  $\text{CHCl}_3$ );  $^1\text{H}$  NMR (400 MHz,

$\text{CDCl}_3$ ):  $\delta$  (ppm) 8.03-7.99 (m, 2H), 7.73 (t,  $J = 7.8$  Hz, 1H), 7.57 (d,  $J = 7.6$  Hz, 1H), 7.35 (d,  $J = 7.6$  Hz, 1H), 7.15 (t,  $J = 8.6$  Hz, 2H), 7.06-6.99 (m, 2H), 6.68-6.65 (m, 2H), 4.66 (dd,  $J_1 = 8.8$  Hz,  $J_2 = 3.6$  Hz, 1H), 2.97-2.87 (m, 1H), 2.75-2.68 (m, 1H), 2.35-2.28 (m, 1H), 2.16-2.04 (m, 1H);  $^{13}\text{C}$  NMR (100 MHz,  $\text{CDCl}_3$ ):  $\delta$  (ppm) 163.7 (d,

$^1J_{\text{FC}} = 247.0$  Hz), 162.9, 155.7, 144.2, 137.7, 135.6, 129.4, 128.9 (d,  $^3J_{\text{FC}} = 8.0$  Hz), 127.1, 121.4, 119.1, 118.7, 117.5, 115.8 (d,  $^2J_{\text{FC}} = 21.0$  Hz), 114.7, 56.9, 28.7, 26.1. HRMS-ESI exact mass calcd. for  $\text{C}_{20}\text{H}_{18}\text{FN}_2^+$  ( $[\text{M}+\text{H}]^+$ ) requires  $m/z$  305.14485, found  $m/z$  305.14474.

The enantiomeric excess was determined by HPLC on Chiralcel AD-H column (hexane : isopropanol = 95 : 5, flowing rate = 1.0 mL/min, 25 °C, UV detection at  $\lambda = 254$  nm),  $t_{\text{R}1} = 25.2$  min (major),  $t_{\text{R}2} = 43.9$  min (minor).

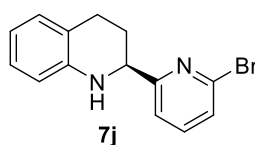

**(S)-2-(6-bromopyridin-2-yl)-1,2,3,4-tetrahydroquinoline (7j):**

(New compound); pale yellow oil, 52% yield, 95% ee;  $[\alpha]_{\text{D}}^{20} = -108.5$  ( $c = 0.25$ ,  $\text{CHCl}_3$ );  $^1\text{H}$  NMR (500 MHz,  $\text{CDCl}_3$ ):  $\delta$  (ppm) 7.53 (t,  $J = 7.8$  Hz, 1H), 7.41-7.37 (m, 2H), 7.04 (t,  $J = 7.5$  Hz, 1H), 6.99 (d,  $J = 7.0$  Hz, 1H), 6.69 (t,  $J = 7.5$  Hz, 1H), 6.65 (d,  $J = 8.0$  Hz, 1H), 4.60 (dd,  $J_1 = 8.0$  Hz,  $J_2 = 4.0$  Hz, 1H), 2.90-2.84 (m, 1H), 2.67-2.61 (m, 1H), 2.28-2.22 (m, 1H), 2.10-2.03 (m, 1H);  $^{13}\text{C}$  NMR (125 MHz,  $\text{CDCl}_3$ ):  $\delta$  (ppm) 165.3, 143.7, 141.7, 139.2, 129.4, 127.2, 126.6, 121.2, 119.5, 117.7, 114.6, 56.5, 28.5, 25.5. HRMS-ESI exact mass calcd. for  $\text{C}_{14}\text{H}_{14}\text{BrN}_2^+$  ( $[\text{M}+\text{H}]^+$ ) requires  $m/z$  289.03349, found  $m/z$  289.03323.

The enantiomeric excess was determined by HPLC on Chiralcel OB-H column (hexane : isopropanol = 95 : 5, flowing rate = 1.0 mL/min, 25 °C, UV detection at  $\lambda = 254$  nm),  $t_{\text{R}1} = 23.4$  min (minor),  $t_{\text{R}2} = 28.2$  min (major).

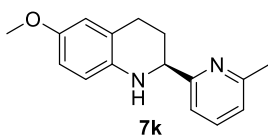

**(S)-6-methoxy-2-(6-methylpyridin-2-yl)-1,2,3,4-tetrahydroquinoline (7k):**

(New compound); pale yellow oil, 80% yield, 95% ee;  $[\alpha]_{\text{D}}^{20} = -82.0$  ( $c = 0.25$ ,  $\text{CHCl}_3$ );  $^1\text{H}$  NMR (500 MHz,  $\text{CDCl}_3$ ):  $\delta$  (ppm) 7.56 (t,  $J = 7.8$  Hz, 1H), 7.24 (t,  $J = 7.5$  Hz, 1H), 7.04 (d,  $J = 7.5$  Hz, 1H), 6.66-6.58 (m, 3H), 4.48 (dd,  $J_1 = 9.3$  Hz,  $J_2 = 2.8$  Hz, 1H), 3.74 (s, 3H), 2.97-2.90 (m, 1H), 2.72-2.67 (m, 1H), 2.56 (s, 3H), 2.27-2.22 (m, 1H), 2.01-1.97 (m, 1H);  $^{13}\text{C}$  NMR (125 MHz,  $\text{CDCl}_3$ ):  $\delta$  (ppm) 162.7, 157.8, 152.1, 138.5, 137.1, 122.6, 121.9, 117.5, 115.9, 114.7, 113.2, 57.4, 56.0, 29.3, 26.7, 24.6. HRMS-ESI exact mass calcd. for  $\text{C}_{16}\text{H}_{19}\text{ON}_2^+$  ( $[\text{M}+\text{H}]^+$ ) requires  $m/z$  255.14919, found  $m/z$  255.14882.

The enantiomeric excess was determined by HPLC on Chiralcel AD-H column (hexane : isopropanol = 95 : 5, flowing rate = 1.0 mL/min, 25 °C, UV detection at  $\lambda$  = 254 nm),  $t_{R1}$  = 15.8 min (minor),  $t_{R2}$  = 18.2 min (major).

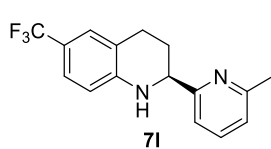

**(S)-2-(6-methylpyridin-2-yl)-6-trifluoromethyl-1,2,3,4-tetra**

**hydroquinoline (7l):** (New compound); colorless oil, 65% yield, 89% ee;  $[\alpha]_D^{20}$  = -69.2 ( $c$  = 0.25,  $\text{CHCl}_3$ );  $^1\text{H}$  NMR (400 MHz,  $\text{CDCl}_3$ ):  $\delta$  (ppm) 7.49 (t,  $J$  = 7.6 Hz, 1H), 7.18-7.14 (m, 2H), 7.08 (d,  $J$  = 8.0 Hz, 1H), 6.98 (d,  $J$  = 7.6 Hz, 1H), 6.54 (d,  $J$  = 8.0 Hz, 1H), 4.93 (s, 1H), 4.50 (d,  $J$  = 6.0 Hz, 1H), 2.87-2.79 (m, 1H), 2.67-2.61 (m, 1H), 2.49 (s, 3H), 2.24-2.15 (m, 1H), 1.96-1.87 (m, 1H),  $^{13}\text{C}$  NMR (100 MHz,  $\text{CDCl}_3$ ):  $\delta$ (ppm) 161.4, 158.1, 147.0, 137.1, 126.4 (q,  $^3J_{\text{FC}}$  = 3.7 Hz), 125.2 (q,  $^1J_{\text{FC}}$  = 268.0 Hz), 124.3 (q,  $^3J_{\text{FC}}$  = 4.0 Hz), 122.0, 121.8, 120.6, 118.5 (q,  $^2J_{\text{FC}}$  = 32.3 Hz), 117.4, 113.6, 56.5, 28.1, 26.0, 24.6. HRMS-ESI exact mass calcd. for  $\text{C}_{16}\text{H}_{16}\text{N}_2\text{F}_3^+$  ( $[\text{M}+\text{H}]^+$ ) requires  $m/z$  293.12601, found  $m/z$  293.12570.

The enantiomeric excess was determined by HPLC on Chiralcel OD-H column (hexane : isopropanol = 95 : 5, flowing rate = 1.0 mL/min, 25 °C, UV detection at  $\lambda$  = 254 nm),  $t_{R1}$  = 9.9 min (major),  $t_{R2}$  = 11.4 min (minor).

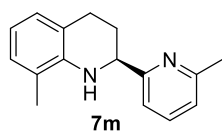

**(S)-8-methyl-2-(6-methylpyridin-2-yl)-1,2,3,4-tetrahydroquinol**

**-ine (7m):** (New compound); pale yellow oil, 79% yield, 98% ee;  $[\alpha]_D^{20}$  = -93.0 ( $c$  = 0.25,  $\text{CHCl}_3$ );  $^1\text{H}$  NMR (500 MHz,  $\text{CDCl}_3$ ):  $\delta$  (ppm) 7.57 (t,  $J$  = 7.8 Hz, 1H), 7.25 (d,  $J$  = 7.0 Hz, 1H), 7.05 (d,  $J$  = 7.5 Hz, 1H), 6.94 (d,  $J$  = 7.0 Hz, 1H), 6.89 (d,  $J$  = 7.0 Hz, 1H), 6.60 (t,  $J_1$  = 7.3 Hz, 1H), 4.60 (d,  $J$  = 7.0 Hz, 1H), 4.42 (s, 1H), 2.98-2.92 (m, 1H), 2.74-2.69 (m, 1H), 2.57 (s, 3H), 2.30-2.25 (m, 1H), 2.17 (s, 3H), 2.01-1.95 (m, 1H);  $^{13}\text{C}$  NMR (125 MHz,  $\text{CDCl}_3$ ):  $\delta$  (ppm) 162.8, 157.8, 142.3, 137.2, 128.2, 127.2, 121.9, 121.6, 120.7, 117.5, 116.7, 57.3, 29.0, 26.5, 24.6, 17.4. HRMS-ESI exact mass calcd. for  $\text{C}_{16}\text{H}_{19}\text{N}_2^+$  ( $[\text{M}+\text{H}]^+$ ) requires  $m/z$  239.15428, found  $m/z$  239.15413.

The enantiomeric excess was determined by HPLC on Chiralcel AD-H column

(hexane : isopropanol = 99 : 1, flowing rate = 1.0 mL/min, 25 °C, UV detection at  $\lambda$  = 254 nm),  $t_{R1}$  = 10.1 min (minor),  $t_{R2}$  = 11.1 min (major).

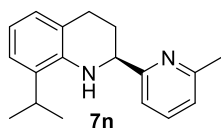

**(S)-8-isopropyl-2-(6-methylpyridin-2-yl)-1,2,3,4-tetrahydroquinoline (7n):** (New compound); pale yellow oil, 83% yield, 86% ee;  $[\alpha]_D^{20}$  = -190.0 ( $c$  = 0.25,  $\text{CHCl}_3$ );  $^1\text{H}$  NMR (500 MHz,  $\text{CDCl}_3$ ):  $\delta$

(ppm) 7.57 (t,  $J$  = 7.5 Hz, 1H), 7.24-7.22 (m, 1H), 7.04 (t,  $J$  = 8.0 Hz, 2H), 6.88 (d,  $J$  = 7.0 Hz, 1H), 6.67 (t,  $J$  = 7.3 Hz, 1H), 4.68 (s, 1H), 4.60-4.59 (m, 1H), 3.00-2.90 (m, 2H), 2.75-2.70 (m, 1H), 2.57 (s, 3H), 2.28-2.25 (m, 1H), 1.98-1.90 (m, 1H), 1.30 (t,  $J$  = 7.3 Hz, 6H);  $^{13}\text{C}$  NMR (125 MHz,  $\text{CDCl}_3$ ):  $\delta$  (ppm) 162.8, 157.7, 141.0, 137.1, 131.8, 127.0, 123.1, 121.8, 121.1, 117.5, 116.9, 57.2, 28.9, 27.3, 26.9, 24.6, 22.4. HRMS-ESI exact mass calcd. for  $\text{C}_{18}\text{H}_{23}\text{N}_2^+$  ( $[\text{M}+\text{H}]^+$ ) requires  $m/z$  267.18558, found  $m/z$  267.18528.

The enantiomeric excess was determined by HPLC on Chiralcel AD-H column (hexane : isopropanol = 95 : 5, flowing rate = 1.0 mL/min, 25 °C, UV detection at  $\lambda$  = 254 nm),  $t_{R1}$  = 4.5 min (major),  $t_{R2}$  = 5.0 min (minor).

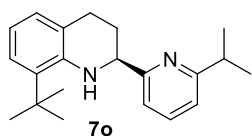

**(S)-8-(*t*-butyl)-2-(6-isopropylpyridin-2-yl)-1,2,3,4-tetrahydroquinoline (7o):** (New compound); pale yellow oil, 88% yield, 77% ee;  $[\alpha]_D^{20}$  = -150.0 ( $c$  = 0.25,  $\text{CHCl}_3$ );  $^1\text{H}$  NMR (400 MHz,  $\text{CDCl}_3$ ):  $\delta$  (ppm) 7.60 (t,  $J$  = 7.8 Hz, 1H), 7.19 (d,  $J$  = 7.6 Hz, 1H), 7.13 (d,  $J$  = 7.2 Hz, 1H), 7.06 (d,  $J$  = 7.6 Hz, 1H), 6.91 (d,  $J$  = 7.2 Hz, 1H), 6.60 (t,  $J$  = 7.6 Hz, 1H), 5.62 (s, 1H), 4.57 (d,  $J$  = 8.8 Hz, 1H), 3.11-3.03 (m, 2H), 2.87-2.81 (m, 1H), 2.37-2.31 (m, 1H), 1.91-1.82 (m, 1H), 1.50 (s, 9H), 1.32 (dd,  $J_1$  = 7.0 Hz,  $J_2$  = 1.8 Hz, 6H);  $^{13}\text{C}$

NMR (100 MHz,  $\text{CDCl}_3$ ):  $\delta$  (ppm) 166.4, 161.1, 142.6, 137.1, 132.9, 127.7, 124.4, 121.3, 119.0, 117.7, 116.1, 56.4, 36.5, 34.4, 30.0, 28.4, 22.8, 22.7. HRMS-ESI exact mass calcd. for  $\text{C}_{21}\text{H}_{29}\text{N}_2^+$  ( $[\text{M}+\text{H}]^+$ ) requires  $m/z$  309.23253, found  $m/z$  309.23193.

The enantiomeric excess was determined by HPLC on Chiralcel AD-H column (hexane : isopropanol = 99.5 : 0.5, flowing rate = 1.0 mL/min, 25 °C, UV detection at  $\lambda$  = 254 nm),  $t_{R1}$  = 17.6 min (major),  $t_{R2}$  = 18.9 min (minor).



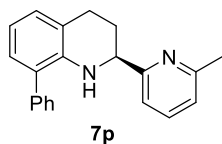

**(S)-2-(6-methylpyridin-2-yl)-8-phenyl-1,2,3,4-tetrahydroquinol**

**-ine (7p):** (New compound); pale yellow oil, 90% yield, 80% ee;

$[\alpha]_D^{20} = -137.0$  ( $c = 0.25$ ,  $\text{CHCl}_3$ );  $^1\text{H}$  NMR (500 MHz,  $\text{CDCl}_3$ ):  $\delta$  (ppm) 7.54-7.50 (m, 3H), 7.43 (t,  $J = 7.8$  Hz, 2H), 7.31 (t,  $J = 7.5$  Hz, 1H), 7.16 (d,  $J = 7.5$  Hz, 1H), 7.01-6.99 (m, 3H), 6.71 (t,  $J = 7.3$  Hz, 1H), 4.81 (s, 1H), 4.53 (d,  $J = 4.5$  Hz, 1H), 2.98-2.92 (m, 1H), 2.76-2.71 (m, 1H), 2.51 (s, 3H), 2.30-2.24 (m, 1H), 2.06-1.99 (m, 1H);  $^{13}\text{C}$  NMR (125 MHz,  $\text{CDCl}_3$ ):  $\delta$  (ppm) 162.9, 157.8, 141.1, 139.7, 137.1, 129.5, 128.9, 128.7, 128.4, 127.2, 126.8, 121.7, 121.1, 117.3, 116.6, 57.0, 28.7, 26.3, 24.5. HRMS-ESI exact mass calcd. for  $\text{C}_{21}\text{H}_{21}\text{N}_2^+$  ( $[\text{M}+\text{H}]^+$ ) requires  $m/z$  301.16993, found  $m/z$  301.17010.

The enantiomeric excess was determined by HPLC on Chiralcel AD-H column (hexane : isopropanol = 95 : 5, flowing rate = 1.0 mL/min, 25 °C, UV detection at  $\lambda = 254$  nm),  $t_{R1} = 5.5$  min (major),  $t_{R2} = 6.1$  min (minor).

## 5. General procedure for the synthesis of P,N-ligands

### (1) Gram-scale asymmetric hydrogenation

**Table S2.** Optimization of the reaction conditions for gram-scale asymmetric hydrogenation of **6d**<sup>a</sup>

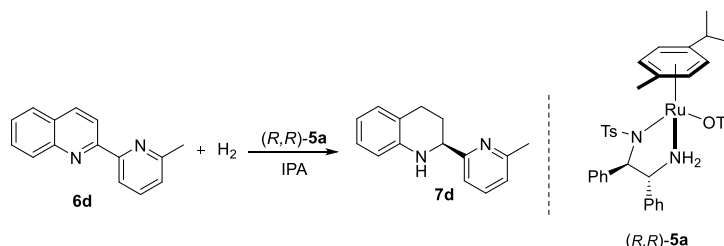

| entry | <b>6d</b> (mg/mmol) | solvent (mL) | time (h) | conv. (%) <sup>b</sup> | ee (%) <sup>c</sup> |
|-------|---------------------|--------------|----------|------------------------|---------------------|
| 1     | 11.5/0.05           | 0.5          | 4        | 96                     | 89                  |
| 2     | 110/0.5             | 5.0          | 4        | 96                     | 88                  |
| 3     | 110/0.5             | 2.5          | 4        | >99                    | 89                  |
| 4     | 220/1.0             | 5.0          | 4        | >99                    | 89                  |
| 5     | 330/1.5             | 5.0          | 4        | >99                    | 89                  |
| 6     | 1100/5.0            | 5.0          | 12       | >99                    | 89                  |
| 7     | 1320/6.0            | 5.0          | 12       | >99                    | 89                  |
| 8     | 2200/10             | 6.0          | 24       | >99                    | 88                  |
| 9     | 3300/15             | 6.0          | 48       | >99                    | 88                  |

<sup>a</sup>Reaction conditions: substrate **6d** in IPA, Ru-catalyst **5a** (2.0 mol %), H<sub>2</sub> (50 atm), stirred at 25 °C. <sup>b</sup>The conversions were determined by <sup>1</sup>H NMR spectroscopy of the crude reaction mixtures.

<sup>c</sup>The enantiomeric excesses were determined by HPLC with a chiral OB-H column.

### (2) The synthesis of P,N-ligands **4**

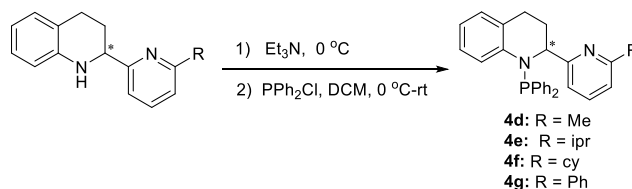

To a stirred solution of tetrahydroquinoline (1.0 eq) in anhydrous DCM (0.5 M) at 0 °C under nitrogen was added anhydrous triethylamine (3.0 eq). After the reaction mixture was stirred at 0 °C for 1 h, chlorodiphenylphosphine (1.0 eq) was added. The

reaction mixture was stirred at 0 °C for 1 h and stirred at room temperature overnight. Then, anhydrous basic aluminum oxide was added to the solution, and the solvent was evaporated under reduced pressure to provide the powder. The powder was eluted by anhydrous petroleum quickly to give the spummy solid. Then, recrystallization from anhydrous methanol yielded the corresponding white solid. The analytical data of the products **4d-g** are summarized below.

Determination of enantiomeric excess: The synthesized ligands were dissolved in DCM and hydrolyzed by adding dilute hydrochloric acid, affording chiral 1,2,3,4-tetrahydroquinolines which were used for the determination of enantiomeric excess.

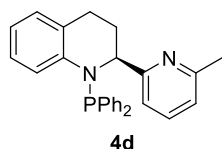

**(S)-1-(diphenylphosphanyl)-2-(6-methylpyridin-2-yl)-1,2,3,4-tetrahydroquinoline (4d)**: (New compound); white solid, m.p. 110-111 °C, 60% yield, 99% ee;  $[\alpha]_D^{20} = -72.4$  ( $c = 0.25$ ,  $\text{CHCl}_3$ );

$^1\text{H}$  NMR (500 MHz,  $\text{CDCl}_3$ ):  $\delta$  (ppm) 8.08-8.05 (m, 1H), 7.44-7.31 (m, 7H), 7.17 (t,  $J = 7.8$  Hz, 1H), 7.10-7.01 (m, 4H), 6.97 (d,  $J = 7.5$  Hz, 1H), 6.78 (t,  $J = 7.5$  Hz, 1H), 6.69 (d,  $J = 7.5$  Hz, 1H), 6.61 (d,  $J = 7.0$  Hz, 1H), 4.95 (s, 1H), 2.59-2.56 (m, 1H), 2.34 (s, 3H), 2.31-2.25 (m, 2H), 2.10-2.04 (m, 1H);  $^{31}\text{P}$  NMR (202 MHz,  $\text{CDCl}_3$ ):  $\delta$  (ppm) 50.7 (s);  $^{13}\text{C}$  NMR (125 MHz,  $\text{CDCl}_3$ ):  $\delta$  (ppm) 161.9, 156.9, 145.8 (d,  $J_{\text{C-P}} = 22.5$  Hz), 137.5 (d,  $J_{\text{C-P}} = 16.3$  Hz), 135.8, 135.6 (d,  $J_{\text{C-P}} = 11.3$  Hz), 134.4 (d,  $J_{\text{C-P}} = 23.8$  Hz), 131.2 (d,  $J_{\text{C-P}} = 18.8$  Hz), 130.0, 129.4, 128.6 (d,  $J_{\text{C-P}} = 5.0$  Hz), 127.9 (d,  $J_{\text{C-P}} = 7.5$  Hz), 127.0, 124.8 (d,  $J_{\text{C-P}} = 3.8$  Hz), 120.4, 118.9, 118.8, 117.5, 117.2, 61.0 (d,  $J_{\text{C-P}} = 7.5$  Hz), 27.3, 24.3, 23.5. HRMS-ESI exact mass calcd. for  $\text{C}_{27}\text{H}_{26}\text{N}_2\text{P}^+$  ( $[\text{M}+\text{H}]^+$ ) requires  $m/z$  409.18281, found  $m/z$  409.18286.

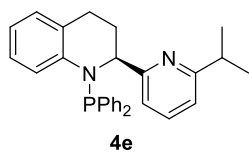

**(S)-1-(diphenylphosphanyl)-2-(6-isopropylpyridin-2-yl)-1,2,3,4-tetrahydroquinoline (4e)**: (New compound); white solid, m.p. 85-87 °C, 58% yield, 99% ee;  $[\alpha]_D^{20} = -116.8$  ( $c = 0.25$ ,  $\text{CHCl}_3$ );

$^1\text{H}$  NMR (500 MHz,  $\text{CDCl}_3$ ):  $\delta$  (ppm) 8.06 (t,  $J = 7.8$  Hz, 1H), 7.44-7.31 (m, 7H), 7.15 (t,  $J = 7.8$  Hz, 1H), 7.11-7.05 (m, 2H), 7.00 (t,  $J = 7.0$  Hz, 2H), 6.96 (d,  $J = 7.5$

Hz, 1H), 6.77 (t,  $J = 7.5$  Hz, 1H), 6.70 (d,  $J = 7.5$  Hz, 1H), 6.59 (d,  $J = 7.5$  Hz, 1H), 4.95 (s, 1H), 2.83 (sept,  $J = 6.8$  Hz, 1H), 2.58-2.54 (m, 1H), 2.29-2.22 (m, 2H), 2.11-2.03 (m, 1H), 1.16 (d,  $J = 7.0$  Hz, 3H), 1.15 (d,  $J = 7.0$  Hz, 3H);  $^{31}\text{P}$  NMR (202 MHz,  $\text{CDCl}_3$ ):  $\delta$  (ppm) 50.4 (s);  $^{13}\text{C}$  NMR (125 MHz,  $\text{CDCl}_3$ ):  $\delta$  (ppm) 166.1, 161.5, 145.9 (d,  $J_{\text{C-P}} = 22.5$  Hz), 137.7 (d,  $J_{\text{C-P}} = 16.3$  Hz), 135.8, 135.6 (d,  $J_{\text{C-P}} = 12.5$  Hz), 134.4 (d,  $J_{\text{C-P}} = 25.0$  Hz), 131.2 (d,  $J_{\text{C-P}} = 18.8$  Hz), 130.0, 129.5, 128.6 (d,  $J_{\text{C-P}} = 5.0$  Hz), 127.9 (d,  $J_{\text{C-P}} = 8.8$  Hz), 126.9, 126.9, 124.9 (d,  $J_{\text{C-P}} = 3.8$  Hz), 119.0, 118.8, 117.4, 117.1, 61.0 (d,  $J_{\text{C-P}} = 6.3$  Hz), 36.4, 27.4, 23.6, 22.7. HRMS-ESI exact mass calcd. for  $\text{C}_{27}\text{H}_{30}\text{N}_2\text{P}^+$  ( $[\text{M}+\text{H}]^+$ ) requires  $m/z$  437.21411, found  $m/z$  437.21396.

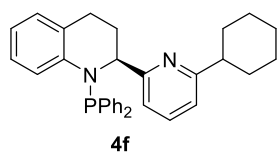

**(S)-2-(6-cyclohexylpyridin-2-yl)-1-(diphenylphosphanyl)-1,2,3,4-tetrahydroquinoline (4f):** (New compound); white solid, m.p. 92-93 °C, 63% yield, 99% ee;  $[\alpha]_{\text{D}}^{20} = -60.0$  ( $c = 0.25$ ,  $\text{CHCl}_3$ );  $^1\text{H}$  NMR (400 MHz,  $\text{CDCl}_3$ ):  $\delta$  (ppm) 7.99 (t,  $J = 7.6$  Hz, 1H), 7.34-7.25 (m, 7H), 7.07 (t,  $J = 7.4$  Hz, 1H), 7.01-6.86 (m, 5H), 6.68 (t,  $J = 7.0$  Hz, 1H), 6.60 (d,  $J = 7.6$  Hz, 1H), 6.50 (d,  $J = 7.2$  Hz, 1H), 4.88 (s, 1H), 2.49-2.40 (m, 2H), 2.20-2.13 (m, 2H), 2.02-1.99 (m, 1H), 1.71-1.61 (m, 5H), 1.27-1.12 (m, 5H);  $^{31}\text{P}$  NMR (162 MHz,  $\text{CDCl}_3$ ):  $\delta$  (ppm) 50.3 (s);  $^{13}\text{C}$  NMR (125 MHz,  $\text{CDCl}_3$ ):  $\delta$  (ppm) 165.3, 161.5, 145.9 (d,  $J_{\text{C-P}} = 22.5$  Hz), 137.7 (d,  $J_{\text{C-P}} = 16.3$  Hz), 135.8, 135.6 (d,  $J_{\text{C-P}} = 11.3$  Hz), 134.4 (d,  $J_{\text{C-P}} = 23.8$  Hz), 131.2 (d,  $J_{\text{C-P}} = 18.8$  Hz), 130.0, 129.5, 128.6 (d,  $J_{\text{C-P}} = 5.0$  Hz), 127.9 (d,  $J_{\text{C-P}} = 7.5$  Hz), 126.9, 124.9 (d,  $J_{\text{C-P}} = 3.8$  Hz), 119.1, 118.8, 117.5, 117.4, 117.1, 61.0 (d,  $J_{\text{C-P}} = 6.3$  Hz), 46.6, 33.1, 27.4, 26.7, 26.2, 23.6. HRMS-ESI exact mass calcd. for  $\text{C}_{32}\text{H}_{34}\text{N}_2\text{P}^+$  ( $[\text{M}+\text{H}]^+$ ) requires  $m/z$  477.24541, found  $m/z$  477.24521.

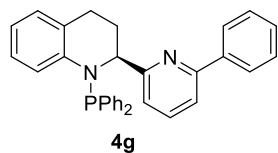

**(S)-1-(diphenylphosphanyl)-2-(6-phenylpyridin-2-yl)-1,2,3,4-tetrahydroquinoline (4g):** (New compound); white solid, m.p. 93-94 °C, 65% yield, 99% ee;  $[\alpha]_{\text{D}}^{20} = -99.2$  ( $c = 0.25$ ,  $\text{CHCl}_3$ );  $^1\text{H}$  NMR (400 MHz,  $\text{CDCl}_3$ ):  $\delta$  (ppm) 8.05 (t,  $J = 7.4$  Hz, 1H), 7.82-7.80 (m, 2H), 7.46-7.35 (m, 10H), 7.29-7.16 (m, 3H), 7.05-6.96 (m, 4H), 6.81-6.74 (m, 2H), 5.05 (s, 1H), 2.61-2.56 (m, 1H), 2.43-2.28 (m, 2H), 2.10-2.02 (m, 1H);  $^{31}\text{P}$  NMR (162

MHz, CDCl<sub>3</sub>):  $\delta$  (ppm) 51.8 (s); <sup>13</sup>C NMR (100 MHz, CDCl<sub>3</sub>):  $\delta$  (ppm) 162.4, 156.2, 145.9 (d,  $J_{C-P}$  = 22.0 Hz), 139.8, 137.7 (d,  $J_{C-P}$  = 17.0 Hz), 136.2, 135.9 (d,  $J_{C-P}$  = 12.0 Hz), 134.1 (d,  $J_{C-P}$  = 23.0 Hz), 131.5 (d,  $J_{C-P}$  = 18.0 Hz), 130.0, 129.5, 128.7, 128.7, 128.6 (d,  $J_{C-P}$  = 5.0 Hz), 128.0 (d,  $J_{C-P}$  = 7.0 Hz), 127.0, 126.9, 125.1 (d,  $J_{C-P}$  = 4.0 Hz), 120.2, 119.1, 117.9, 117.7, 117.6, 61.1 (d,  $J_{C-P}$  = 6.0 Hz), 27.3, 23.6. HRMS-ESI exact mass calcd. for C<sub>32</sub>H<sub>28</sub>N<sub>2</sub>P<sup>+</sup> ([M+H]<sup>+</sup>) requires m/z 471.19846, found m/z 471.19861.

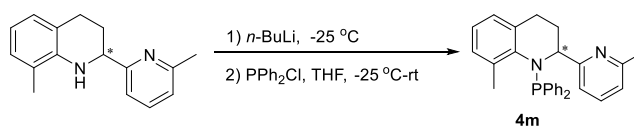

To a stirred solution of tetrahydroquinoline (1.0 eq) in anhydrous THF (0.5 M) at -25 °C under nitrogen was added *n*-BuLi (1.2 eq). After the reaction mixture was stirred at -25 °C for 1 h, chlorodiphenylphosphine (1.0 eq) was added. The reaction mixture was stirred at -25 °C for 1 h and stirred at room temperature overnight. Then, anhydrous basic aluminum oxide was added to the solution and the solvent was evaporated under reduced pressure to provide the powder. The powder was eluted by anhydrous petroleum quickly to give the spummy solid. Then, recrystallization from anhydrous methanol yielded **4m** as a white solid. The analytical data of the product are summarized below.

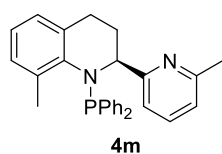

**(S)-1-(diphenylphosphanyl)-8-methyl-2-(6-methylpyridin-2-yl)-1,2,3,4-tetrahydroquinoline (4m):** (New compound); white solid,

m.p. 100-101 °C, 43% yield, 99% ee;  $[\alpha]_D^{20}$  = -113.5 (*c* = 0.25, CHCl<sub>3</sub>); <sup>1</sup>H NMR (500 MHz, CDCl<sub>3</sub>):  $\delta$  (ppm) 7.50 (t, *J* = 7.0 Hz, 2H), 7.45-7.33 (m, 6H), 7.24-7.19 (m, 3H), 7.12 (d, *J* = 7.5 Hz, 1H), 6.94 (d, *J* = 7.5 Hz, 1H), 6.90-6.86 (m, 2H), 6.74 (d, *J* = 7.0 Hz, 1H), 4.77 (s, 1H), 2.62 (s, 3H), 2.45 (s, 3H), 2.33-2.28 (m, 1H), 2.08-2.01 (m, 1H), 1.94-1.89 (m, 1H), 1.18-1.12 (m, 1H); <sup>31</sup>P NMR (202 MHz, CDCl<sub>3</sub>):  $\delta$  (ppm) 63.0 (s); <sup>13</sup>C NMR (125 MHz, CDCl<sub>3</sub>):  $\delta$  (ppm) 163.0, 157.5,

144.5 (d,  $J_{C-P}$  = 20.0 Hz), 138.1 (d,  $J_{C-P}$  = 18.8 Hz), 137.9 (d,  $J_{C-P}$  = 5.0 Hz), 136.7, 134.8 (d,  $J_{C-P}$  = 23.8 Hz), 131.2 (d,  $J_{C-P}$  = 5.0 Hz), 131.0 (d,  $J_{C-P}$  = 5.0 Hz), 130.8 (d,

$J_{C-P} = 18.8$  Hz), 130.1, 129.7, 128.7 (d,  $J_{C-P} = 6.3$  Hz), 128.2 (d,  $J_{C-P} = 5.0$  Hz), 127.9, 126.8, 120.0 (d,  $J_{C-P} = 2.5$  Hz), 120.8, 118.4, 60.8 (d,  $J_{C-P} = 8.8$  Hz), 26.6, 24.7, 23.8, 20.5 (d,  $J_{C-P} = 18.8$  Hz). HRMS-ESI exact mass calcd. for  $C_{28}H_{28}N_2P^+$  ( $[M+H]^+$ ) requires  $m/z$  423.19846, found  $m/z$  423.19785.

## 6. General procedure for the synthesis of Ir-P,N-catalysts

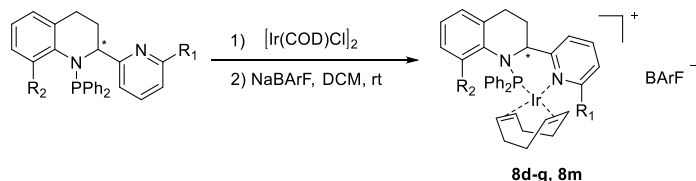

General procedure:<sup>3</sup> To a stirred solution of P,N-ligands (1.0 eq) in anhydrous DCM (0.5 M) at 25 °C under nitrogen was added  $[Ir(COD)Cl]_2$  (0.5 eq). After the reaction mixture was stirred at 25 °C for 2 h, sodium tetrakis[3,5-bis(trifluoromethyl)phenyl]borate (1.5 eq) was added. The reaction mixture was stirred at room temperature for another 2 h. Then, the solvent was evaporated under reduced pressure. The residue was purified by silica gel column chromatography (eluent: DCM) to yield the red solid. The analytical data of the products are summarized below.

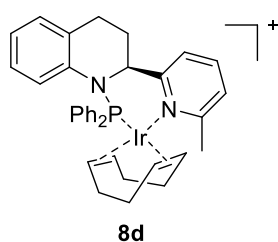

**(S)-8d:** (New compound); red solid, m.p. 185-187 °C, 83% yield;  $[\alpha]_D^{20} = -56.0$  ( $c = 0.25$ ,  $CHCl_3$ );  $^1H$  NMR (500 MHz,  $CD_2Cl_2$ ):  $\delta$  (ppm) 7.73 (s, 8H), 7.56 (s, 4H), 7.49-7.43 (m, 2H), 7.39-7.29 (m, 7H), 7.22-7.18 (m, 2H), 7.10-7.05 (m, 2H), 6.92-6.87 (m, 1H), 6.67 (t,  $J = 7.5$  Hz, 1H), 6.48 (t,  $J = 7.8$  Hz, 1H), 6.21 (d,  $J = 8.0$  Hz, 1H), 5.02 (m, 1H), 4.13-4.07 (m, 2H), 3.36-3.35 (m, 1H), 3.07-2.99 (m, 2H), 2.86-2.84 (m, 1H), 2.60-2.42 (m, 4H), 2.37-2.27 (m, 5H), 2.20-2.04 (m, 2H), 1.73-1.55 (m, 2H);  $^{31}P$  NMR (162 MHz,  $CD_2Cl_2$ ):  $\delta$  (ppm) 59.6 (s);  $^{13}C$  NMR (125 MHz,  $CD_2Cl_2$ ):  $\delta$  (ppm) 162.2 (q,  $^1J_{C-B} = 49.2$  Hz, 4C; BARF quat. C *ipso* to B), 161.1, 160.1, 140.3, 139.1 (d,  $J_{C-P} = 5.0$  Hz), 135.2 (br,  $^2J_{C-B}$ ,  $^3J_{C-F}$ , 8C; BARF *ortho* CH), 132.3, 132.2 (d,  $J_{C-P} = 2.5$  Hz), 132.1 (d,  $J_{C-P} = 11.3$  Hz), 132.0 (d,  $J_{C-P} = 2.5$  Hz), 131.8, 131.4 (d,  $J_{C-P} = 2.5$  Hz), 130.5 (d,  $J_{C-P}$

= 12.5 Hz), 129.3 (qq,  $^3J_{C-B}$ ,  $^2J_{C-F}$ , 8C; BArF C *ipso* to CF<sub>3</sub>), 128.3, 127.9, 126.6, 125.0 (q,  $^1J_{C-F}$  = 270.8 Hz, 8C; BArF CF<sub>3</sub>), 122.7, 122.6, 122.2, 120.9 (d,  $J_{C-P}$  = 3.8 Hz), 119.6, 117.9 (sept,  $^3J_{C-F}$  = 3.8 Hz, 4C; BArF *para* CH), 98.0 (d,  $J_{C-P}$  = 10.0 Hz), 89.5 (d,  $J_{C-P}$  = 13.8 Hz), 67.8 (d,  $J_{C-P}$  = 13.8 Hz), 66.7, 64.4, 37.1 (d,  $J_{C-P}$  = 2.5 Hz), 34.1, 31.0, 29.1, 28.0 (d,  $J_{C-P}$  = 7.5 Hz), 27.7, 26.0 (d,  $J_{C-P}$  = 18.8 Hz). FTMS-ESI exact mass calcd. for C<sub>35</sub>H<sub>37</sub>IrN<sub>2</sub>P<sup>+</sup> ([M-BArF]<sup>+</sup>) requires m/z 709.23181, found m/z 709.23151.

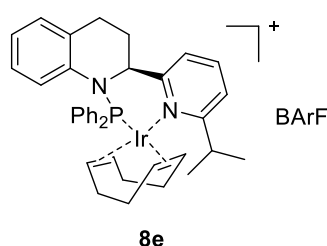

**(S)-8e:** (New compound); red solid, m.p. 150-152 °C, 85% yield;  $[\alpha]_D^{20}$  = -35.2 (*c* = 0.25, CHCl<sub>3</sub>); <sup>1</sup>H NMR (500 MHz, CDCl<sub>3</sub>): δ (ppm) 7.59 (t, *J* = 7.8 Hz, 1H), 7.52 (s, 8H), 7.33 (s, 4H), 7.26 (d, *J* = 8.0 Hz, 1H), 7.22-7.17 (m, 3H), 7.14-7.07 (m, 4H), 7.00 (t, *J* = 8.0 Hz, 3H), 6.81 (d, *J* = 7.5 Hz, 1H), 6.69 (qui, *J* = 6.0 Hz, 1H), 6.46 (t, *J* = 7.5 Hz, 1H), 6.25 (t, *J* = 7.8 Hz, 1H), 5.91 (d, *J* = 8.0 Hz, 1H), 4.90 (m, 1H), 4.09 (m, 1H), 3.85-3.83 (m, 1H), 3.66 (qui, *J* = 6.7 Hz, 1H), 3.08 (m, 1H), 2.85-2.76 (m, 2H), 2.57-2.55 (m, 1H), 2.42-2.35 (m, 1H), 2.28-2.18 (m, 2H), 2.12-2.07 (m, 2H), 1.92-1.78 (m, 2H), 1.46-1.32 (m, 3H), 1.14-1.07 (m, 6H); <sup>31</sup>P NMR (202 MHz, CDCl<sub>3</sub>): δ (ppm) 59.0 (s); <sup>13</sup>C NMR (125 MHz, CDCl<sub>3</sub>): δ (ppm) 171.0, 161.8 (q,  $^1J_{C-B}$  = 49.6 Hz, 4C; BArF quat. C *ipso* to B), 159.0, 140.7, 138.9 (d,  $J_{C-P}$  = 5.0 Hz), 134.9 (br,  $^2J_{C-B}$ ,  $^3J_{C-F}$ , 8C; BArF *ortho* CH), 132.0 (d,  $J_{C-P}$  = 2.5 Hz), 131.8 (d,  $J_{C-P}$  = 10.0 Hz), 131.5 (d,  $J_{C-P}$  = 2.5 Hz), 131.2, 130.9 (d,  $J_{C-P}$  = 2.5 Hz), 130.8, 130.1 (d,  $J_{C-P}$  = 12.5 Hz), 129.7 (d,  $J_{C-P}$  = 10.0 Hz), 129.0 (qq,  $^3J_{C-B}$ ,  $^2J_{C-F}$ , 8C; BArF C *ipso* to CF<sub>3</sub>), 128.2, 126.6, 124.7 (q,  $^1J_{C-F}$  = 270.8 Hz, 8C; BArF CF<sub>3</sub>), 124.4, 123.0, 122.6, 120.8 (d,  $J_{C-P}$  = 3.8 Hz), 119.5, 117.6 (sept,  $^3J_{C-F}$  = 3.8 Hz, 4C; BArF *para* CH), 97.1 (d,  $J_{C-P}$  = 8.8 Hz), 86.4 (d,  $J_{C-P}$  = 16.3 Hz), 67.3, 66.8 (d,  $J_{C-P}$  = 13.8 Hz), 65.1, 39.9, 37.7 (d,  $J_{C-P}$  = 2.5 Hz), 34.9, 28.2, 27.9 (d,  $J_{C-P}$  = 7.5 Hz), 27.7, 25.0 (d,  $J_{C-P}$  = 2.5 Hz), 23.7, 22.4. FTMS-ESI exact mass calcd. for C<sub>37</sub>H<sub>41</sub>IrN<sub>2</sub>P<sup>+</sup> ([M-BArF]<sup>+</sup>) requires m/z 737.26311, found m/z 737.26355.

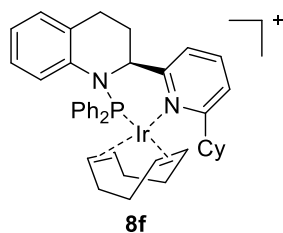

**(S)-8f:** (New compound); red solid, m.p. 180-182 °C, 75% yield;  $[\alpha]_D^{20} = -33.2$  ( $c = 0.25$ ,  $\text{CHCl}_3$ );  $^1\text{H}$  NMR (500 MHz,  $\text{CDCl}_3$ ):  $\delta$  (ppm) 7.77-7.71 (m, 9H), 7.51 (m, 4H), 7.43 (t,  $J = 6.8$  Hz, 1H), 7.38-7.37 (m, 3H), 7.31-7.24 (m, 4H), 7.22-7.18 (m, 2H), 7.13 (t,  $J = 7.0$  Hz, 1H), 6.98 (t,  $J = 6.3$  Hz, 1H), 6.87-6.82 (m, 1H), 6.66-6.61 (m, 1H), 6.45-6.41 (m, 1H), 6.11 (t,  $J = 7.0$  Hz, 1H), 5.09 (m, 1H), 4.36 (m, 1H), 3.94-3.93 (m, 1H), 3.65-3.63 (m, 1H), 3.24 (m, 1H), 3.03-3.00 (m, 1H), 2.72 (m, 1H), 2.60-2.30 (m, 5H), 2.08-2.01 (m, 2H), 1.91 (m, 2H), 1.72-1.43 (m, 7H), 1.26-1.16 (m, 3H), 0.96-0.93 (m, 1H), 0.56-0.54 (m, 1H);  $^{31}\text{P}$  NMR (162 MHz,  $\text{CDCl}_3$ ):  $\delta$  (ppm) 58.3 (s);  $^{13}\text{C}$  NMR (125 MHz,  $\text{CDCl}_3$ ):  $\delta$  (ppm) 169.4, 161.9 (q,  $^1J_{\text{C-B}} = 49.2$  Hz, 4C; BArF quat. C *ipso* to B), 159.2, 140.6, 138.9 (d,  $J_{\text{C-P}} = 3.8$  Hz), 135.0 (br,  $^2J_{\text{C-B}}$ ,  $^3J_{\text{C-F}}$ , 8C; BArF *ortho* CH), 132.0, 131.8 (d,  $J_{\text{C-P}} = 10.0$  Hz), 131.4, 131.3, 131.0, 130.9, 130.1 (d,  $J_{\text{C-P}} = 12.5$  Hz), 129.6 (d,  $J_{\text{C-P}} = 10.0$  Hz), 128.9 (qq,  $^3J_{\text{C-B}}$ ,  $^2J_{\text{C-F}}$ , 8C; BArF C *ipso* to  $\text{CF}_3$ ), 128.2, 126.6, 125.0, 124.8 (q,  $^1J_{\text{C-F}} = 282.1$  Hz, 8C; BArF  $\text{CF}_3$ ), 123.1, 122.6, 120.8, 119.4, 117.6 (sept,  $^3J_{\text{C-F}}$ , 4C; BArF *para* CH), 97.1 (d,  $J_{\text{C-P}} = 8.8$  Hz), 86.0 (d,  $J_{\text{C-P}} = 15.0$  Hz), 67.6, 66.7 (d,  $J_{\text{C-P}} = 13.8$  Hz), 65.4, 53.6, 51.1, 38.3, 35.4, 34.0, 33.1, 29.9, 27.9 (d,  $J_{\text{C-P}} = 12.5$  Hz), 27.7 (d,  $J_{\text{C-P}} = 16.3$  Hz), 26.5, 25.5, 25.2. FTMS-ESI exact mass calcd. for  $\text{C}_{40}\text{H}_{45}\text{IrN}_2\text{P}^+$  ( $[\text{M-BArF}]^+$ ) requires  $m/z$  777.29441, found  $m/z$  777.29352.

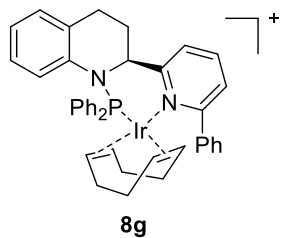

**(S)-8g:** (New compound); red solid, m.p. 188-189 °C, 87% yield;  $[\alpha]_D^{20} = -68.8$  ( $c = 0.25$ ,  $\text{CHCl}_3$ );  $^1\text{H}$  NMR (500 MHz,  $\text{CDCl}_3$ ):  $\delta$  (ppm) 7.97-7.93 (m, 1H), 7.73-7.68 (m, 9H), 7.55-7.47 (m, 10H), 7.39-7.29 (m, 7H), 7.06 (d,  $J = 7.5$  Hz, 2H), 6.99 (d,  $J = 7.5$  Hz, 1H), 6.86-6.81 (m, 1H), 6.67 (t,  $J = 7.3$  Hz, 1H), 6.51 (t,  $J = 7.8$  Hz, 1H), 6.31 (d,  $J = 8.0$  Hz, 1H), 4.63 (m, 1H), 4.16 (m, 1H), 3.41 (m, 1H), 3.06-2.98 (m, 2H), 2.79-2.62 (m, 3H), 2.39-2.26 (m, 2H), 2.10-1.89 (m, 4H), 1.26-1.25 (m, 1H), 1.12-1.11 (m, 1H), 0.97-0.93 (m, 1H);  $^{31}\text{P}$  NMR (202 MHz,  $\text{CDCl}_3$ ):  $\delta$  (ppm) 58.8 (s);  $^{13}\text{C}$  NMR (125 MHz,  $\text{CDCl}_3$ ):  $\delta$  (ppm) 162.3, 161.9 (q,  $^1J_{\text{C-B}} = 49.6$  Hz, 4C; BArF quat. C *ipso* to B), 160.5, 140.4, 139.0 (d,



$J_{C-P} = 5.0$  Hz), 138.6, 135.0 (br,  $^2J_{C-B}$ ,  $^3J_{C-F}$ , 8C; BArF *ortho* CH), 133.9, 133.5, 132.1, 131.9 (d,  $J_{C-P} = 10.0$  Hz), 131.6, 131.4, 131.1, 129.9 (d,  $J_{C-P} = 12.5$  Hz), 129.7 (d,  $J_{C-P} = 10.0$  Hz), 129.0 (qq,  $^3J_{C-B}$ ,  $^2J_{C-F}$ , 8C; BArF C *ipso* to CF<sub>3</sub>), 128.2, 128.0, 127.3, 126.7, 124.7 (q,  $^1J_{C-F} = 270.8$  Hz, 8C; BArF CF<sub>3</sub>), 123.1, 122.8, 122.7, 121.0, 120.2, 117.6 (sept,  $^3J_{C-F}$ , 4C; BArF *para* CH), 94.0 (d,  $J_{C-P} = 8.8$  Hz), 85.7 (d,  $J_{C-P} = 15.0$  Hz), 67.3 (d,  $J_{C-P} = 15.0$  Hz), 66.8, 65.6, 36.2, 34.7, 29.9, 28.2 (d,  $J_{C-P} = 8.8$  Hz), 27.6, 24.5. FTMS-ESI exact mass calcd. for C<sub>40</sub>H<sub>39</sub>IrN<sub>2</sub>P<sup>+</sup> ([M-BArF]<sup>+</sup>) requires m/z 771.24746, found m/z 771.24725.

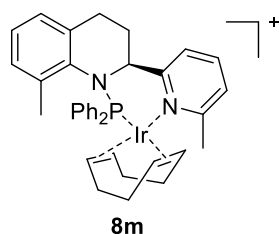

**(S)-8m:** (New compound); red solid, m.p. 192-193 °C, 84% yield;  $[\alpha]_D^{20} = -44.8$  ( $c = 0.25$ , CHCl<sub>3</sub>); <sup>1</sup>H NMR (500 MHz, CDCl<sub>3</sub>):  $\delta$  (ppm) 7.72 (s, 8H), 7.52 (s, 4H), 7.35-7.25 (m, 8H), 7.14-6.97 (m, 6H), 6.84-6.81 (m, 1H), 6.48 (d,  $J = 7.0$  Hz, 1H), 5.05 (m, 1H), 4.68-4.54 (m, 2H), 4.12 (m, 1H), 3.97-3.96 (m, 1H), 3.68-3.63 (m, 1H), 3.41-3.36 (m, 1H), 3.27 (m, 1H), 2.99-2.87 (m, 1H), 2.44-2.16 (m, 8H), 2.01-1.95 (m, 1H), 1.56 (m, 5H); <sup>31</sup>P NMR (202 MHz, CDCl<sub>3</sub>):  $\delta$  (ppm) 58.9 (s); <sup>13</sup>C NMR (125 MHz, CDCl<sub>3</sub>):  $\delta$  (ppm) 162.0, 161.8 (q,  $^1J_{C-B} = 49.6$  Hz, 4C; BArF quat. C *ipso* to B), 159.8, 142.4, 139.2, 135.0 (br,  $^2J_{C-B}$ ,  $^3J_{C-F}$ , 8C; BArF *ortho* CH), 133.8, 133.2 (d,  $J_{C-P} = 11.3$  Hz), 132.8, 132.5, 132.2, 132.0, 131.0, 129.9 (d,  $J_{C-P} = 12.5$  Hz), 128.9 (qq,  $^3J_{C-B}$ ,  $^2J_{C-F}$ , 8C; BArF C *ipso* to CF<sub>3</sub>), 128.0 (d,  $J_{C-P} = 11.3$  Hz), 127.4 (d,  $J_{C-P} = 20.0$  Hz), 125.9, 125.1, 123.6 (q,  $^1J_{C-F} = 270.6$  Hz, 8C; BArF CF<sub>3</sub>), 120.6, 120.2, 117.6 (sept,  $^3J_{C-F}$ , 4C; BArF *para* CH), 95.4 (d,  $J_{C-P} = 10.0$  Hz), 92.1 (d,  $J_{C-P} = 13.8$  Hz), 69.9 (d,  $J_{C-P} = 7.5$  Hz), 65.8, 59.2, 37.2 (d,  $J_{C-P} = 32.5$  Hz), 34.0, 29.9, 28.6, 28.3, 27.2, 24.8, 20.8. FTMS-ESI exact mass calcd. for C<sub>36</sub>H<sub>39</sub>IrN<sub>2</sub>P<sup>+</sup> ([M-BArF]<sup>+</sup>) requires m/z 723.24746, found m/z 723.24579.

## 7. General procedure for asymmetric hydrogenation of olefins

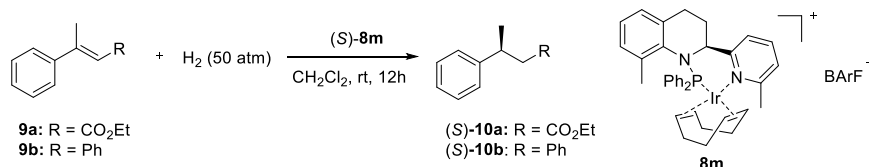

A 30 mL glass-lined stainless-steel reactor equipped with a magnetic stirrer bar was charged with Ir-catalyst (*S*)-**8m** (3.4 mg, 2.0 mol %) and substrate **6** (0.1 mmol) in DCM (1.0 mL) under nitrogen atmosphere in a glove box. The autoclave was closed, and the final pressure of the hydrogen gas was adjusted to 50 atm after purging the autoclave with hydrogen gas several times. The reaction mixture was stirred at 25 °C for 12 h. Then the hydrogen gas was carefully released and the conversion was determined by  $^1\text{H}$  NMR. The reaction mixture was filtered through a short pad of silica (petroleum/DCM, 2/1, v/v) to give the pure product. The enantiomeric excess of the product was determined by HPLC with a chiral column. The analytical data of the products are summarized below.

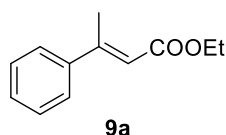

**Ethyl *trans*-beta-methylcinnamate (9a):** (Known compound, see: A. Lightfoot, P. Schnider and A. Pfaltz, *Angew. Chem., Int. Ed.* 1998, **37**, 2897); colourless oil;  $^1\text{H}$  NMR (300 MHz,  $\text{CDCl}_3$ ):

$\delta$  (ppm) 7.49-7.45 (m, 2H), 7.38-7.34 (m, 3H), 6.13 (m, 1H), 4.21 (q,  $J = 7.1$  Hz, 2H), 2.57 (s, 3H), 1.31 (t,  $J = 7.1$  Hz, 3H);  $^{13}\text{C}$  NMR (125 MHz,  $\text{CDCl}_3$ ):  $\delta$  (ppm) 166.9, 155.5, 142.3, 129.0, 128.5, 126.4, 117.3, 59.9, 18.0, 14.4.

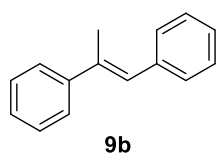

***E*-1,2-diphenylpropene (9b):** (Known compound, see: A. Lightfoot, P. Schnider and A. Pfaltz, *Angew. Chem., Int. Ed.* 1998, **37**, 2897); colourless oil;  $^1\text{H}$  NMR (300 MHz,  $\text{CDCl}_3$ ):  $\delta$  (ppm)

7.54-7.52 (m, 2H), 7.40-7.35 (m, 6H), 7.31-7.21 (m, 2H), 6.84 (m, 1H), 2.29 (s, 3 H);  $^{13}\text{C}$  NMR (125 MHz,  $\text{CDCl}_3$ ):  $\delta$  (ppm) 144.1, 138.5, 137.6, 129.3, 128.5, 128.3, 127.8, 127.3, 126.6, 126.1, 17.6.

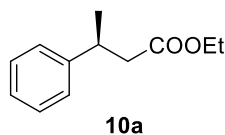

**Ethyl (*S*)-3-phenylbutanoate (10a):** (Known compound, see: A. Lightfoot, P. Schnider and A. Pfaltz, *Angew. Chem., Int. Ed.* 1998, **37**, 2897); colourless oil, 94% yield, 99% ee;  $[\alpha]_{\text{D}}^{20} = +40$  ( $c = 0.25$ ,  $\text{CHCl}_3$ ), [Lit.<sup>4</sup>  $[\alpha]_{\text{D}}^{20} = +9.3$  ( $c = 1.43$ ,  $\text{CHCl}_3$ ), 82% ee for (*S*) enantiomer];  $^1\text{H}$  NMR (300 MHz,  $\text{CDCl}_3$ ):  $\delta$  (ppm) 7.31-7.20 (m, 5H), 4.06 (q,  $J = 7.2$  Hz, 2H), 3.27 (q,  $J = 7.1$  Hz, 1H), 2.64-2.48 (m, 2H), 1.29 (d,  $J = 6.9$  Hz, 3H), 1.16 (t,  $J = 7.1$  Hz, 3H);  $^{13}\text{C}$  NMR (125 MHz,  $\text{CDCl}_3$ ):  $\delta$  (ppm) 172.4, 145.8, 128.5, 126.8, 126.4, 60.2, 43.0, 36.6, 21.8, 14.2.

The enantiomeric excess was determined by HPLC on Chiralcel OB-H column (hexane : isopropanol = 99.5 : 0.5, flowing rate = 1.0 mL/min, 25 °C, UV detection at  $\lambda = 254$  nm),  $t_{\text{R}1} = 7.4$  min (minor),  $t_{\text{R}2} = 9.3$  min (major).

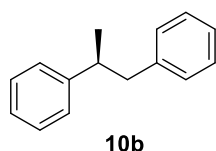

**(*S*)-1,2-Diphenylpropane (10b):** (Known compound, see: A. Lightfoot, P. Schnider and A. Pfaltz, *Angew. Chem., Int. Ed.* 1998, **37**, 2897); colourless oil, 95% yield, 99% ee;  $[\alpha]_{\text{D}}^{20} = +37$  ( $c = 0.25$ ,  $\text{CHCl}_3$ ), [Lit.<sup>5</sup>  $[\alpha]_{\text{D}}^{23.5} = -80.5$  ( $c = 2.07$ ,  $\text{CHCl}_3$ ), >99% ee for (*R*) enantiomer];  $^1\text{H}$  NMR (500 MHz,  $\text{CDCl}_3$ ):  $\delta$  (ppm) 7.27-7.13 (m, 7H), 7.07-7.06 (m, 2H), 3.01-2.91 (m, 2H), 2.77-2.73 (m, 1H), 1.23 (d,  $J = 6.5$  Hz, 3H);  $^{13}\text{C}$  NMR (125 MHz,  $\text{CDCl}_3$ ):  $\delta$  (ppm) 147.1, 140.9, 129.3, 128.4, 128.2, 127.2, 126.1, 126.0, 45.2, 42.0, 21.3.

The enantiomeric excess was determined by HPLC on Chiralcel OJ-H column (hexane : isopropanol = 95 : 5, flowing rate = 1.0 mL/min, 25 °C, UV detection at  $\lambda = 254$  nm),  $t_{\text{R}1} = 5.5$  min (minor),  $t_{\text{R}2} = 8.5$  min (major).

## 8. General procedure for the synthesis of benzoazepines and benzodiazepines

### (1) The procedure for the synthesis of 2,4-diaryl-3*H*-benzo[*b*]azepines

The corresponding substrates were synthesized according to the previously reported procedures.<sup>6a</sup>

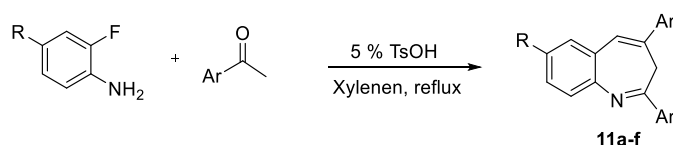

A solution of 2-fluoroaniline (6.0 mmol, 1.0 equiv), aryl methyl ketone (6.0 mmol, 1.0 equiv) and *p*-toluenesulfonic acid (0.05 g, 0.3 mmol, 0.05 equiv) in 30 mL of xylene was heated to reflux for 24 h. After cooling to room temperature, the solution was washed with saturated NaHCO<sub>3</sub> solution, and dried over Na<sub>2</sub>SO<sub>4</sub>. Removal of the solvent under reduced pressure gave dark oil or solid, which was purified by crystallization using EtOH as solvent. The analytical data of the products are summarized below.

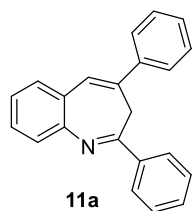

**2,4-diphenyl-3*H*-benzo[*b*]azepine (11a):** (Known compound, see: K.

Ramig, S. Alli, M. Cheng, M. Leung, R. Razi, M. Washington and L.

Kudzma, *Synlett* 2007, **18**, 2868); <sup>1</sup>H NMR (500 MHz, CDCl<sub>3</sub>): δ

(ppm) 7.89-7.87 (m, 2H), 7.60-7.59 (m, 1H), 7.55-7.54 (m, 2H), 7.48

(d, *J* = 8.0 Hz, 1H), 7.40-7.32 (m, 7H), 7.23-7.20 (m, 1H), 7.08 (s, 1H), 3.40 (s, 2H);

<sup>13</sup>C NMR (125 MHz, CDCl<sub>3</sub>): δ (ppm) 157.6, 146.8, 140.0, 138.2, 135.0, 130.7, 130.4,

129.7, 128.9, 128.7, 128.2, 128.1, 128.0, 127.1, 127.0, 126.9, 124.2, 34.0.

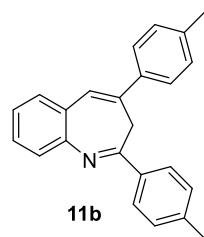

**2,4-di-*p*-tolyl-3*H*-benzo[*b*]azepine (11b):** (Known compound, see:

K. Ramig, S. Alli, M. Cheng, M. Leung, R. Razi, M. Washington

and L. Kudzma, *Synlett* 2007, **18**, 2868); <sup>1</sup>H NMR (500 MHz,

CDCl<sub>3</sub>): δ (ppm) 7.81-7.78 (m, 2H), 7.61-7.57 (m, 1H), 7.47-7.43

(m, 3H), 7.38-7.35 (m, 1H), 7.23-7.04 (m, 5H), 7.04 (s, 1H), 3.36 (s, 2H), 2.36 (s, 3H),

2.32 (s, 3H);  $^{13}\text{C}$  NMR (125 MHz,  $\text{CDCl}_3$ ):  $\delta$  (ppm) 157.7, 146.5, 140.8, 137.9, 137.1, 135.0, 130.6, 129.9, 129.6, 129.4, 128.3, 128.2, 128.0, 127.0, 126.8, 126.2, 124.1, 33.8, 21.5, 21.3.

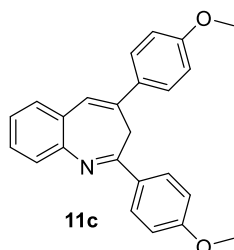

**2,4-bis(4-methoxyphenyl)-3H-benzo[*b*]azepine (11c):** (Known compound, see: K. Ramig, S. Alli, M. Cheng, M. Leung, R. Razi, M. Washington and L. Kudzma, *Synlett* 2007, **18**, 2868);  $^1\text{H}$  NMR (500 MHz,  $\text{CDCl}_3$ ):  $\delta$  (ppm) 7.87-7.85 (m, 2H), 7.56-7.55 (m, 1H), 7.51-7.45 (m, 3H), 7.38-7.34 (m, 1H), 7.20-7.17 (m, 1H), 6.99 (s, 1H), 6.93-6.90 (m, 2H), 6.86-6.83 (m, 2H), 3.83 (s, 3H), 3.79 (s, 3H), 3.33 (s, 2H);  $^{13}\text{C}$  NMR (125 MHz,  $\text{CDCl}_3$ ):  $\delta$  (ppm) 161.4, 159.5, 156.5, 146.9, 134.5, 132.7, 130.9, 130.6, 129.9, 128.2, 128.0, 126.8, 125.4, 123.7, 114.2, 114.0, 55.5, 33.8.

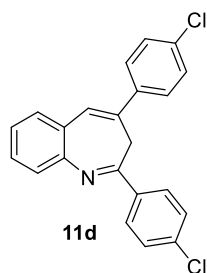

**2,4-bis(4-chlorophenyl)-3H-benzo[*b*]azepine (11d):** (Known compound, see: K. Ramig, S. Alli, M. Cheng, M. Leung, R. Razi, M. Washington and L. Kudzma, *Synlett* 2007, **18**, 2868);  $^1\text{H}$  NMR (500 MHz,  $\text{CDCl}_3$ ):  $\delta$  (ppm) 7.86-7.85 (m, 2H), 7.74 (s, 1H), 7.61-7.26 (m, 9H), 7.10 (s, 1H), 3.40 (s, 2H);  $^{13}\text{C}$  NMR (125 MHz,  $\text{CDCl}_3$ ):  $\delta$  (ppm) 142.5, 140.1, 137.7, 134.5, 133.5, 130.7, 130.1, 129.3, 128.8, 128.2, 127.9, 127.8, 127.7, 126.1, 33.9.

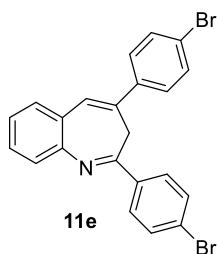

**2,4-bis(4-bromophenyl)-3H-benzo[*b*]azepine (11e):** (Known compound, see: Z.-S. Yang, Z.-Y. Ding, F. Chen, Y.-M. He, N.-F. Yang and Q.-H. Fan, *Eur. J. Org. Chem.*, 2017, 1973);  $^1\text{H}$  NMR (500 MHz,  $\text{CDCl}_3$ ):  $\delta$  (ppm) 7.74-7.72 (m, 2H), 7.59-7.48 (m, 6H), 7.43-7.38 (m, 3H), 7.26-7.23 (m, 1H), 7.06-7.05 (m, 1H), 3.32 (s, 2H);  $^{13}\text{C}$  NMR (125 MHz,  $\text{CDCl}_3$ ):  $\delta$  (ppm) 156.0, 146.5, 138.7, 136.7, 133.4, 132.2, 132.0, 130.7, 129.7, 129.4, 128.5, 128.1, 127.5, 127.5, 125.3, 124.5, 122.4, 33.6.

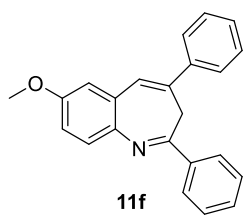

**7-methoxy-2,4-diphenyl-3H-benzo[b]azepine (11f):** (Known compound, see: Z.-S. Yang, Z.-Y. Ding, F. Chen, Y.-M. He, N.-F. Yang and Q.-H. Fan, *Eur. J. Org. Chem.*, 2017, 1973);  $^1\text{H}$  NMR (500 MHz,  $\text{CDCl}_3$ ):  $\delta$  (ppm) 7.86-7.85 (m, 2H), 7.53-7.52 (m, 3H), 7.37-7.28 (m, 6H), 7.02-7.00 (m, 2H), 6.91 (s, 1H), 3.83 (s, 3H), 3.39 (s, 2H);  $^{13}\text{C}$  NMR (125 MHz,  $\text{CDCl}_3$ ):  $\delta$  (ppm) 155.9, 141.3, 139.9, 138.5, 134.8, 130.7, 130.0, 129.9, 128.8, 128.6, 128.0, 127.9, 126.9, 126.7, 115.6, 112.5, 55.5, 33.8.

## (2) The procedure for the synthesis of 2,4-diaryl-3H-benzodiazepines

The corresponding substrates were synthesized according to the previously reported procedures.<sup>6b</sup>

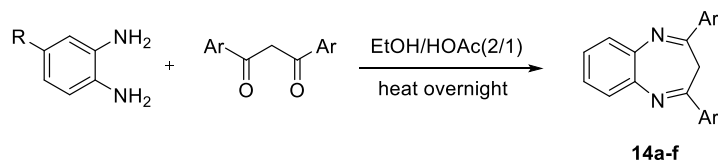

2,4-Diaryl-substituted-3H-1,5-benzodiazepines **14a-f** were prepared according to the method previously reported in the literature. o-Phenylenediamine (5 mmol) and 1,3-diarylpentane-1,3-dione (5 mmol) in a mixture of ethanol (5 mL) and acetic acid (2.5 mL) were heated overnight. The mixture was cooled, neutralized by NaOH and then recrystallized from ethanol. The analytical data of the products are summarized below.

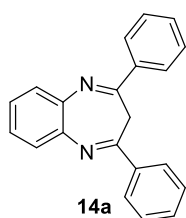

**2,4-diphenyl-3H-1,5-benzodiazepine (14a):** (Known compound, see: I. L. Finar, *J. Chem. Soc.*, 1958, 4904); white solid, m.p. 156-159 °C, 65% yield;  $^1\text{H}$  NMR (500 MHz,  $\text{CDCl}_3$ ):  $\delta$  (ppm) 7.98-7.96 (m, 4H), 7.64-7.60 (m, 2H), 7.44-7.39 (m, 6H), 7.37-7.33 (m, 2H);  $^{13}\text{C}$  NMR (125 MHz,  $\text{CDCl}_3$ ):  $\delta$  (ppm) 154.3, 140.8, 137.4, 130.7, 128.9, 128.8, 128.2, 125.6, 35.1.

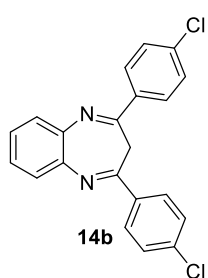

**2,4-bis(4-chlorophenyl)-3H-1,5-benzozepine (14b):** (Known compound, see: Z.-Y. Ding, F. Chen, J. Qin, Y.-M. He and Q.-H. Fan, *Angew. Chem., Int. Ed.* 2012, **51**, 5706); white solid, m.p. 220-222 °C, 63% yield; <sup>1</sup>H NMR (500 MHz, CDCl<sub>3</sub>): δ (ppm) 7.89-7.87 (m, 4H), 7.59-7.57 (m, 2H), 7.39-7.33 (m, 6H); <sup>13</sup>C NMR (125 MHz, CDCl<sub>3</sub>): δ (ppm) 152.5, 140.6, 137.2, 135.6, 129.5, 129.1, 128.9, 125.9, 34.7.

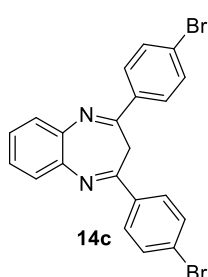

**2,4-bis(4-bromophenyl)-3H-1,5-benzozepine (14c):** (Known compound, see: Z.-Y. Ding, F. Chen, J. Qin, Y.-M. He and Q.-H. Fan, *Angew. Chem., Int. Ed.* 2012, **51**, 5706); white solid, m.p. 223-225 °C, 84% yield; <sup>1</sup>H NMR (500 MHz, CDCl<sub>3</sub>): δ (ppm) 7.83-7.81 (m, 4H), 7.59-7.55 (m, 6H), 7.37-7.35 (m, 2H); <sup>13</sup>C NMR (125 MHz, CDCl<sub>3</sub>): δ (ppm) 152.6, 140.6, 136.1, 132.2, 129.8, 128.9, 126.0, 125.8, 34.6.

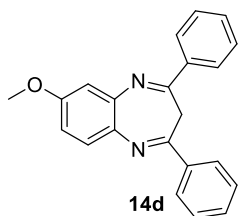

**7-methoxy-2,4-diphenyl-3H-1,5-benzodiazepine (14d):** (Known compound, see: Z.-Y. Ding, F. Chen, J. Qin, Y.-M. He and Q.-H. Fan, *Angew. Chem., Int. Ed.* 2012, **51**, 5706); yellow solid, m.p. 169-172 °C, 78% yield; <sup>1</sup>H NMR (500 MHz, CDCl<sub>3</sub>): δ (ppm) 7.97-7.96 (m, 4H), 7.55-7.53 (m, 1H), 7.43-7.40 (m, 6H), 7.09-7.07 (m, 1H), 7.00-6.97 (m, 1H); 3.90 (s, 3H); <sup>13</sup>C NMR (125 MHz, CDCl<sub>3</sub>): δ (ppm) 157.1, 153.7, 151.8, 141.8, 137.6, 137.4, 135.1, 130.8, 130.5, 130.3, 128.9, 128.8, 128.3, 128.1, 115.1, 110.1, 55.7, 35.3.

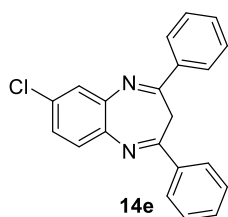

**7-chloro-2,4-Diphenyl-3H-1,5-benzodiazepine (14e):** (Known compound, see: M. Takahashi, T. Takada and T. Sakagami, *J. Heterocyclic Chem.* 1987, **24**, 797); white solid, m.p. 178-180 °C, 69% yield; <sup>1</sup>H NMR (500 MHz, CDCl<sub>3</sub>): δ (ppm) 7.97-7.96 (m,

4H), 7.61 (d,  $J = 2.0$  Hz, 1H), 7.53 (d,  $J = 8.5$  Hz, 1H), 7.45-7.40 (m, 6H), 7.31-7.28 (m, 1H);  $^{13}\text{C}$  NMR (125 MHz,  $\text{CDCl}_3$ ):  $\delta$  (ppm) 155.1, 154.5, 141.6, 139.4, 137.2, 137.0, 131.1, 131.0, 130.6, 130.2, 128.9, 128.4, 128.3, 128.2, 125.9, 35.3.

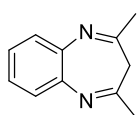

**14f**

**2,4-dimethyl-3H-1,5-benzodiazepine (14f):** (Known compound, see: I. L. Finar, *J. Chem. Soc.*, 1958, 4904); white solid, m.p. 146-147 °C, 79% yield;  $^1\text{H}$  NMR (500 MHz,  $\text{CDCl}_3$ ):  $\delta$  (ppm) 7.36-7.35 (m, 2H), 7.22-7.20 (m, 2H), 2.81 (s, 2H), 2.34 (s, 6H);  $^{13}\text{C}$  NMR (125 MHz,  $\text{CDCl}_3$ ):  $\delta$  (ppm) 157.8, 140.4, 127.6, 125.0, 43.3, 27.8.

## 9. General procedure for asymmetric hydrogenation of cyclic imines

### (1) Asymmetric hydrogenation of 2,4-diaryl-3H-benzo[*b*]azepines

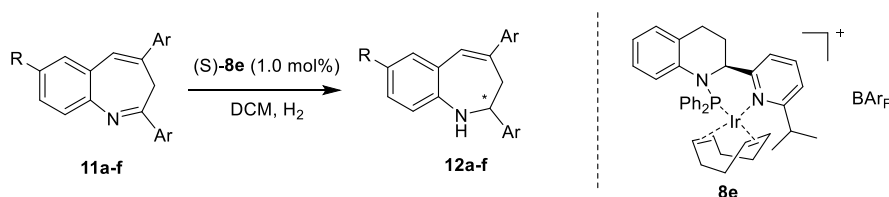

**For 12 a-f:** A 30 mL glass-lined stainless-steel reactor equipped with a magnetic stirrer bar was charged with Ir-catalyst (*S*)-**8e** (3.4 mg, 1.0 mol %) and substrate **11** (0.2 mmol) in DCM (2 mL) under nitrogen atmosphere in a glove box. The autoclave was closed, and the final pressure of the hydrogen gas was adjusted to 50 atm after purging the autoclave with hydrogen gas several times. The reaction mixture was stirred at 25 °C for 12 h. Then, the hydrogen gas was carefully released and the conversion was determined by  $^1\text{H}$  NMR. The reaction mixture was filtered through a short pad of silica (petroleum/DCM, 2/1, v/v) to give the pure products. The enantiomeric excess of the product was determined by HPLC with a chiral column. The analytical data of the products are summarized below.

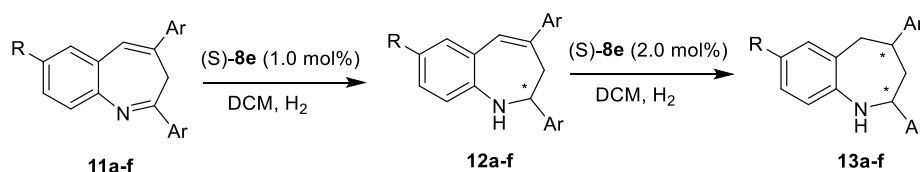



**For 13a-f (one-pot and two-step):** A 30 mL glass-lined stainless-steel reactor equipped with a magnetic stirrer bar was charged with Ir-catalyst (*S*)-**8e** (3.4 mg, 1.0 mol %) and substrate **11** (0.2 mmol) in DCM (2 mL) under nitrogen atmosphere in a glove box. The autoclave was closed, and the final pressure of the hydrogen gas was adjusted to 50 atm after purging the autoclave with hydrogen gas several times. The reaction mixture was stirred at 25 °C for 12 h. Then, the hydrogen gas was carefully released, and another Ir-catalyst (*S*)-**8e** (6.8 mg, 2.0 mol %) in DCM (2 mL) was added. The final pressure of the hydrogen gas was adjusted to 50 atm after purging the autoclave with hydrogen gas several times. The reaction mixture was stirred at 25 °C for 12 h. Then, the hydrogen gas was carefully released and the conversion was determined by <sup>1</sup>H NMR. The reaction mixture was filtered through a short pad of silica (petroleum/acetone, 45/1, v/v) to give the pure products. The enantiomeric excess of the product was determined by HPLC with a chiral column. The analytical data of the products are summarized below.

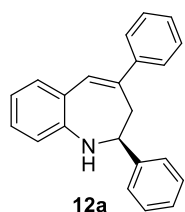

**(*S*)-2,4-diphenyl-2,3-dihydro-1*H*-benzo[*b*]azepine (12a):** (Known compound, see: Z.-S. Yang, Z.-Y. Ding, F. Chen, Y.-M. He, N.-F. Yang and Q.-H. Fan, *Eur. J. Org. Chem.*, 2017, 1973); white solid, 94% yield, 87% ee;  $[\alpha]_{\text{D}}^{20} = -260.2$  ( $c = 0.25$ , CHCl<sub>3</sub>); <sup>1</sup>H NMR (500 MHz, CDCl<sub>3</sub>):  $\delta$  (ppm) 7.44-7.42 (m, 2H), 7.39-7.38 (m, 4H), 7.34-7.29 (m, 3H), 7.24-7.21 (m, 2H), 7.04-7.00 (m, 1H), 6.83-6.80 (m, 1H), 6.76 (d,  $J = 2.5$  Hz, 1H), 6.61 (d,  $J = 7.5$  Hz, 1H), 4.40 (dd,  $J_1 = 9.5$  Hz,  $J_2 = 1.5$  Hz, 1H), 3.33-3.27 (m, 1H), 3.02 (dd,  $J_1 = 17.5$  Hz,  $J_2 = 1.5$  Hz, 1H); <sup>13</sup>C NMR (125 MHz, CDCl<sub>3</sub>):  $\delta$  (ppm) 147.2, 144.7, 144.6, 139.0, 134.1, 129.2, 128.4, 128.0, 127.9, 127.0, 126.9, 126.2, 123.2, 119.6, 117.9, 59.7, 44.8.

The enantiomeric excess was determined by HPLC on Chiralcel OD-H column (hexane : isopropanol = 85 : 15, flowing rate = 1.0 mL/min, 25 °C, UV detection at  $\lambda = 254$  nm),  $t_{\text{R}1} = 6.9$  min (major),  $t_{\text{R}2} = 9.6$  min (minor).

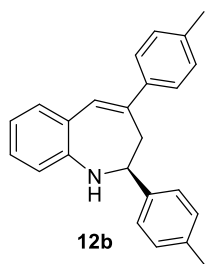

**(S)-2,4-di-p-tolyl-2,3-dihydro-1H-benzo[b]azepine (12b):**

(Known compound, see: Z.-S. Yang, Z.-Y. Ding, F. Chen, Y.-M. He, N.-F. Yang and Q.-H. Fan, *Eur. J. Org. Chem.*, 2017, 1973); white solid, 91% yield, 90% ee;  $[\alpha]_{\text{D}}^{20} = -213.0$  ( $c = 1.0$ ,  $\text{CHCl}_3$ );  $^1\text{H}$  NMR (500 MHz,  $\text{CDCl}_3$ ):  $\delta$  (ppm) 7.33 (d,  $J = 8.5$  Hz, 2H), 7.27 (d,  $J = 7.5$  Hz, 2H), 7.21-7.16 (m, 3H), 7.11 (d,  $J = 7.5$  Hz, 2H), 6.99 (t,  $J = 7.3$  Hz, 1H), 6.79 (t,  $J = 7.3$  Hz, 1H), 6.74 (d,  $J = 1.5$  Hz, 1H), 6.57 (d,  $J = 8.0$  Hz, 1H), 4.34 (d,  $J = 9.5$  Hz, 1H), 3.29-3.23 (m, 1H), 3.00 (d,  $J = 17.5$  Hz, 1H), 2.35 (s, 3H), 2.32 (s, 3H);

$^{13}\text{C}$  NMR (125 MHz,  $\text{CDCl}_3$ ):  $\delta$  (ppm) 147.3, 141.9, 141.8, 138.9, 137.6, 136.7, 134.0, 129.8, 129.1, 128.5, 127.7, 126.7, 126.0, 123.3, 119.5, 117.8, 59.3, 44.9, 21.2, 21.2.

The enantiomeric excess was determined by HPLC on Chiralcel OD-H column (hexane : isopropanol = 85 : 15, flowing rate = 1.0 mL/min, 25 °C, UV detection at  $\lambda = 254$  nm),  $t_{\text{R}1} = 6.1$  min (major),  $t_{\text{R}2} = 12.3$  min (minor).

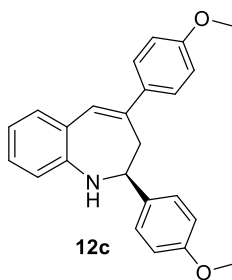

**(S)-2,4-bis(4-methoxyphenyl)-2,3-dihydro-1H-benzo[b]azepine (12c):**

(Known compound, see: Z.-S. Yang, Z.-Y. Ding, F. Chen, Y.-M. He, N.-F. Yang and Q.-H. Fan, *Eur. J. Org. Chem.*, 2017, 1973); white solid, 90% yield, 95% ee;  $[\alpha]_{\text{D}}^{20} = -237.6$  ( $c = 0.25$ ,  $\text{CHCl}_3$ );  $^1\text{H}$  NMR (500 MHz,  $\text{CDCl}_3$ ):  $\delta$  (ppm) 7.39-7.37 (m, 2H), 7.33-7.30 (m, 2H), 7.25-7.21 (m, 2H), 7.03-7.00 (m, 1H), 6.93-6.91 (m, 2H), 6.87-6.81 (m, 3H), 6.70 (d,  $J = 2.0$  Hz, 1H), 6.63 (d,  $J = 6.0$  Hz, 1H), 4.37 (d,  $J = 9.0$  Hz, 1H), 3.85-3.76 (m, 5H), 3.28-3.22 (m, 1H), 2.98 (d,  $J = 17.0$  Hz, 1H);  $^{13}\text{C}$  NMR (125 MHz,  $\text{CDCl}_3$ ):  $\delta$  (ppm) 159.3, 158.8, 147.0, 138.6, 137.2, 137.0, 133.9, 128.0, 127.8, 127.6, 127.3, 123.6, 119.7, 118.0, 114.5, 113.8, 59.2, 55.5, 44.9, 29.9.

The enantiomeric excess was determined by HPLC on Chiralcel OD-H column (hexane : isopropanol = 85 : 15, flowing rate = 1.0 mL/min, 25 °C, UV detection at  $\lambda = 254$  nm),  $t_{\text{R}1} = 12.1$  min (major),  $t_{\text{R}2} = 40.1$  min (minor).

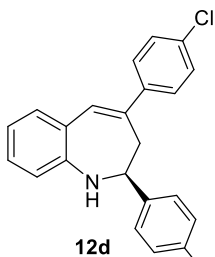

**(S)-2,4-bis(4-chlorophenyl)-2,3-dihydro-1H-benzo[b]azepine**

**(12d):** (Known compound, see: Z.-S. Yang, Z.-Y. Ding, F. Chen, Y.-M. He, N.-F. Yang and Q.-H. Fan, *Eur. J. Org. Chem.*, 2017, 1973); yellow solid, 89% yield, 92% ee;  $[\alpha]_{\text{D}}^{20} = -210.6$  ( $c = 0.25$ ,  $\text{CHCl}_3$ ), [Lit.<sup>7</sup>  $[\alpha]_{\text{D}}^{20} = -218.4$  ( $c = 1.0$ ,  $\text{CHCl}_3$ ), 89% ee for

(*S*) enantiomer];  $^1\text{H}$  NMR (400 MHz,  $\text{CDCl}_3$ ):  $\delta$  (ppm) 7.37-7.21 (m, 9H), 7.06 (t,  $J = 7.6$  Hz, 1H), 6.84 (t,  $J = 7.6$  Hz, 1H), 6.73 (s, 1H), 6.65 (d,  $J = 7.6$  Hz, 1H), 4.42 (d,  $J = 8.8$  Hz, 1H), 3.27-3.20 (m, 1H), 2.94 (d,  $J = 16.8$  Hz, 1H);  $^{13}\text{C}$  NMR (125 MHz,  $\text{CDCl}_3$ ):  $\delta$  (ppm) 147.1, 142.9, 137.3, 134.2, 133.8, 132.8, 129.7, 129.4, 129.2, 128.8, 128.5, 128.2, 128.2, 127.4, 122.9, 119.8, 118.0, 59.1, 44.4.

The enantiomeric excess was determined by HPLC on Chiralcel OD-H column (hexane : isopropanol = 85 : 15, flowing rate = 1.0 mL/min, 25 °C, UV detection at  $\lambda = 254$  nm),  $t_{\text{R}1} = 8.5$  min (major),  $t_{\text{R}2} = 13.2$  min (minor).

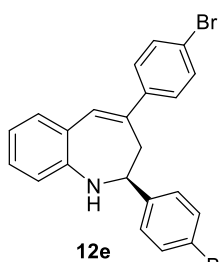

**(S)-2,4-bis(4-bromophenyl)-2,3-dihydro-1H-benzo[b]azepine**

**(12e):** (Known compound, see: Z.-S. Yang, Z.-Y. Ding, F. Chen, Y.-M. He, N.-F. Yang and Q.-H. Fan, *Eur. J. Org. Chem.*, 2017, 1973); yellow solid, 55% yield, 88% ee;  $[\alpha]_{\text{D}}^{20} = -207.6$  ( $c = 0.25$ ,  $\text{CHCl}_3$ );  $^1\text{H}$  NMR (400 MHz,  $\text{CDCl}_3$ ):  $\delta$  (ppm) 7.47 (d,  $J =$

8.4 Hz, 2H), 7.41-7.38 (m, 2H), 7.24-7.18 (m, 5H), 7.05-7.00 (m, 1H), 6.81 (t,  $J = 7.4$  Hz, 1H), 6.71 (d,  $J = 1.6$  Hz, 1H), 6.60 (d,  $J = 8.0$  Hz, 1H), 4.35 (d,  $J = 8.0$  Hz, 1H), 3.22-3.15 (m, 1H), 2.90 (dd,  $J_1 = 17.0$  Hz,  $J_2 = 1.4$  Hz, 1H);  $^{13}\text{C}$  NMR (100 MHz,  $\text{CDCl}_3$ ):  $\delta$  (ppm) 146.9, 143.3, 143.2, 137.2, 134.2, 132.2, 131.4, 129.7, 128.5, 128.2, 127.7, 122.8, 121.8, 120.9, 119.8, 118.0, 59.0, 44.1.

The enantiomeric excess was determined by HPLC on Chiralcel OD-H column (hexane : isopropanol = 85 : 15, flowing rate = 1.0 mL/min, 25 °C, UV detection at  $\lambda = 254$  nm),  $t_{\text{R}1} = 9.4$  min (major),  $t_{\text{R}2} = 14.9$  min (minor).

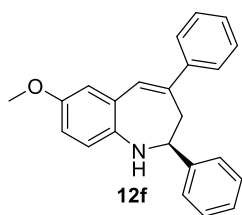

**(S)-7-methoxy-2,4-diphenyl-2,3-dihydro-1H-benzo[b]azepine**

**(12f):** (Known compound, see: Z.-S. Yang, Z.-Y. Ding, F. Chen, Y.-M. He, N.-F. Yang and Q.-H. Fan, *Eur. J. Org. Chem.*, 2017,

1973); white solid, 65% yield, 90% ee;  $[\alpha]_{\text{D}}^{20} = -278.0$  ( $c = 0.25$ ,

$\text{CHCl}_3$ );  $^1\text{H}$  NMR (500 MHz,  $\text{CDCl}_3$ ):  $\delta$  (ppm) 7.44-7.43 (m, 2H), 7.38-7.37 (m, 4H), 7.32-7.29 (m, 3H), 7.22 (d,  $J = 7.5$  Hz, 1H), 6.78 (d,  $J = 3.0$  Hz, 1H), 6.71 (s, 1H), 6.66-6.63 (m, 1H), 6.55 (d,  $J = 8.5$  Hz, 1H), 4.34 (d,  $J = 9.0$  Hz, 1H), 3.75 (s, 3H), 3.31-3.25 (m, 1H), 2.99 (d,  $J = 17.0$  Hz, 1H);  $^{13}\text{C}$  NMR (125 MHz,  $\text{CDCl}_3$ ):  $\delta$  (ppm) 153.4, 144.8, 144.5, 141.6, 140.0, 129.1, 128.8, 128.4, 127.9, 127.1, 126.8, 126.2, 124.6, 119.1, 117.8, 114.5, 60.4, 55.8, 45.0.

The enantiomeric excess was determined by HPLC on Chiralcel OD-H column (hexane : isopropanol = 85 : 15, flowing rate = 1.0 mL/min, 25 °C, UV detection at  $\lambda = 254$  nm),  $t_{\text{R}1} = 7.7$  min (major),  $t_{\text{R}2} = 8.5$  min (minor).

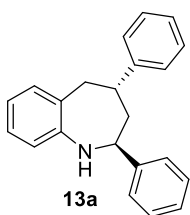

**(2S,4S)-2,4-diphenyl-2,3,4,5-tetrahydro-1H-benzo[b]azepine (13a):**

(New compound); white solid, m.p. 107-108 °C, 90% yield, dr = 11:1,

88% ee;  $[\alpha]_{\text{D}}^{20} = +25.2$  ( $c = 0.25$ ,  $\text{CHCl}_3$ );  $^1\text{H}$  NMR (500 MHz,

$\text{CDCl}_3$ ):  $\delta$  (ppm) 7.45-7.44 (m, 2H), 7.37-7.32 (m, 2H), 7.30-7.27 (m,

5H), 7.21-7.18 (m, 1H), 7.15 (d,  $J = 7.5$  Hz, 1H), 7.09 (t,  $J = 7.5$  Hz, 2H), 6.90 (t,  $J = 7.3$  Hz, 1H), 6.77 (d,  $J = 7.5$  Hz, 1H), 3.94 (d,  $J = 11.0$  Hz, 1H), 3.78 (s, 1H), 3.29 (t,  $J = 12.5$  Hz, 1H), 2.95 (d,  $J = 13.5$  Hz, 1H), 2.80 (t,  $J = 11.5$  Hz, 1H), 2.26-2.10 (m, 2H);  $^{13}\text{C}$  NMR (125 MHz,  $\text{CDCl}_3$ ):  $\delta$  (ppm) 149.4, 148.0, 145.7, 132.9, 131.1, 129.0, 128.7, 127.8, 127.3, 126.8, 126.6, 125.3, 121.9, 120.4, 63.7, 49.1, 44.7, 43.2. HRMS-ESI exact mass calcd. for  $\text{C}_{22}\text{H}_{22}\text{N}^+$  ( $[\text{M}+\text{H}]^+$ ) requires  $m/z$  300.17468, found  $m/z$  300.17505.

The enantiomeric excess was determined by HPLC on Chiralcel OD-H column (hexane : isopropanol = 90 : 10, flowing rate = 1.0 mL/min, 25 °C, UV detection at  $\lambda = 254$  nm),  $t_{\text{R}1} = 5.3$  min (major),  $t_{\text{R}2} = 6.3$  min (minor).

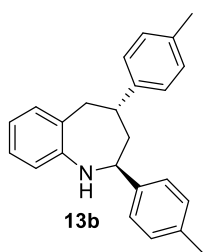

**(2*S*,4*S*)-2,4-di-*p*-tolyl-2,3,4,5-tetrahydro-1*H*-benzo[*b*]azepine**

**(13b):** (New compound); white solid, m.p. 127-129 °C, 93% yield, dr = 12:1, 90% ee;  $[\alpha]_{\text{D}}^{20} = +31.6$  ( $c = 0.25$ ,  $\text{CHCl}_3$ );  $^1\text{H}$  NMR (500 MHz,  $\text{CDCl}_3$ ):  $\delta$  (ppm) 7.32 (d,  $J = 8.0$  Hz, 2H), 7.18-7.06 (m, 8H), 6.88 (t,  $J = 7.0$  Hz, 1H), 6.74 (d,  $J = 7.0$  Hz, 1H), 3.89 (d,  $J = 10.5$  Hz, 1H), 3.72 (s, 1H), 3.25 (t,  $J = 12.5$  Hz, 1H), 2.91 (d,  $J = 13.5$  Hz, 1H), 2.76 (t,  $J = 11.5$  Hz, 1H), 2.33 (s, 3H), 2.31 (s, 3H), 2.22-2.15 (m, 1H), 2.07 (d,  $J = 13.0$  Hz, 1H);  $^{13}\text{C}$  NMR (125 MHz,  $\text{CDCl}_3$ ):  $\delta$  (ppm) 149.4, 145.1, 142.8, 137.4, 135.7, 133.0, 131.1, 129.5, 129.3, 127.2, 126.7, 126.5, 121.8, 120.4, 63.4, 49.0, 44.2, 43.4, 21.2, 21.1. HRMS-ESI exact mass calcd. for  $\text{C}_{24}\text{H}_{26}\text{N}^+$  ( $[\text{M}+\text{H}]^+$ ) requires  $m/z$  328.20598, found  $m/z$  328.20609.

The enantiomeric excess was determined by HPLC on Chiralcel OD-H column (hexane : isopropanol = 90 : 10, flowing rate = 1.0 mL/min, 25 °C, UV detection at  $\lambda = 254$  nm),  $t_{\text{R}1} = 4.6$  min (major),  $t_{\text{R}2} = 5.8$  min (minor).

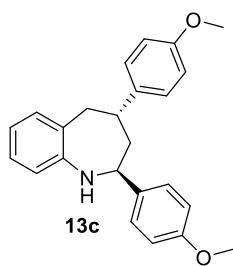

**(2*S*,4*S*)-2,4-bis(4-methoxyphenyl)-2,3,4,5-tetrahydro-1*H*-benzo[*b*]azepine (13c):** (New compound); white solid, m.p. 134-135 °C,

87% yield, dr = 16:1, 99% ee;  $[\alpha]_{\text{D}}^{20} = +11.6$  ( $c = 0.25$ ,  $\text{CHCl}_3$ );  $^1\text{H}$  NMR (500 MHz,  $\text{CDCl}_3$ ):  $\delta$  (ppm) 7.36 (d,  $J = 8.5$  Hz, 2H), 7.23-7.20 (m, 2H), 7.13 (d,  $J = 7.5$  Hz, 1H), 7.09 (t,  $J = 7.5$  Hz, 1H), 6.88-6.84 (m, 5H), 6.77 (s, 1H), 3.89 (d,  $J = 11.0$  Hz, 1H), 3.79 (s, 3H), 3.78 (s, 1H), 3.24 (s, 1H), 2.91 (d,  $J = 14.0$  Hz, 1H), 2.75 (t,  $J = 11.5$  Hz, 1H), 2.19 (d,  $J = 9.5$  Hz, 1H), 2.07-2.04 (m, 1H);  $^{13}\text{C}$  NMR (125 MHz,  $\text{CDCl}_3$ ):  $\delta$  (ppm) 159.1, 158.0, 149.4, 140.3, 138.1, 132.9, 131.1, 128.4, 127.7, 127.2, 121.8, 120.4, 114.2, 114.0, 63.1, 55.4, 55.4, 49.1, 43.8, 43.5. HRMS-ESI exact mass calcd. for  $\text{C}_{24}\text{H}_{26}\text{NO}_2^+$  ( $[\text{M}+\text{H}]^+$ ) requires  $m/z$  360.19581, found  $m/z$  360.19580.

The enantiomeric excess was determined by HPLC on Chiralcel OD-H column (hexane : isopropanol = 90 : 10, flowing rate = 0.5 mL/min, 25 °C, UV detection at  $\lambda = 254$  nm),  $t_{\text{R}1} = 38.8$  min (major),  $t_{\text{R}2} = 66.6$  min (minor).

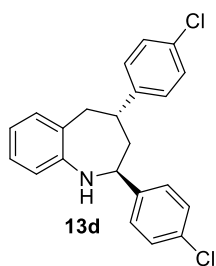

**(2*S*,4*S*)-2,4-bis(4-chlorophenyl)-2,3,4,5-tetrahydro-1*H*-benzo[*b*]**

**azepine (13d):** (New compound); white solid, m.p. 203-204 °C, 95%

yield, dr = 20:1, 96% ee;  $[\alpha]_D^{20} = +27.6$  ( $c = 0.25$ ,  $\text{CHCl}_3$ );  $^1\text{H}$

NMR (400 MHz,  $\text{CDCl}_3$ ):  $\delta$  (ppm) 7.38-7.36 (m, 2H), 7.32-7.30

(m, 2H), 7.27-7.25 (m, 2H), 7.23-7.21 (m, 2H), 7.18-7.08 (m, 2H),

6.92 (t,  $J = 7.0$  Hz, 1H), 6.78 (s, 1H), 3.90 (d,  $J = 11.6$  Hz, 1H), 3.23 (t,  $J = 11.6$  Hz,

1H), 2.88 (d,  $J = 14.0$  Hz, 1H), 2.76 (t,  $J = 11.6$  Hz, 1H), 2.16-2.13 (m, 1H), 2.02 (d,  $J$

= 12.8 Hz, 1H);  $^{13}\text{C}$  NMR (100 MHz,  $\text{CDCl}_3$ ):  $\delta$  (ppm) 149.0, 146.2, 143.9, 133.5,

132.5, 132.0, 131.2, 129.0, 128.8, 128.1, 127.9, 127.5, 122.1, 120.5, 62.9, 48.8, 44.0,

43.0. HRMS-ESI exact mass calcd. for  $\text{C}_{22}\text{H}_{20}\text{NCl}_2^+$  ( $[\text{M}+\text{H}]^+$ ) requires  $m/z$  368.09673, found  $m/z$  368.09700.

The enantiomeric excess was determined by HPLC on Chiralcel OD-H column (hexane : isopropanol = 90 : 10, flowing rate = 1.0 mL/min, 25 °C, UV detection at  $\lambda = 254$  nm),  $t_{R1} = 6.9$  min (major),  $t_{R2} = 9.6$  min (minor).

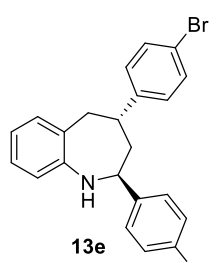

**(2*S*,4*S*)-2,4-bis(4-bromophenyl)-2,3,4,5-tetrahydro-1*H*-benzo[*b*]**

**azepine (13e):** (New compound); white solid, m.p. 204-205 °C, 92%

yield, dr = 5:1, 90% ee;  $[\alpha]_D^{20} = +25.6$  ( $c = 0.25$ ,  $\text{CHCl}_3$ );  $^1\text{H}$  NMR

(500 MHz,  $\text{CDCl}_3$ ):  $\delta$  (ppm) 7.46-7.45 (m, 2H), 7.35-7.26 (m, 8H),

7.21-7.11 (m, 3H), 6.92 (s, 1H), 6.79 (s, 1H), 3.96 (d,  $J = 10.0$  Hz,

1H), 3.80 (s, 1H), 3.30 (s, 1H), 2.95 (d,  $J = 13.5$  Hz, 1H), 2.84-2.79 (m, 1H), 2.23 (s,

1H), 2.12 (d,  $J = 13.0$  Hz, 1H);  $^{13}\text{C}$  NMR (125 MHz,  $\text{CDCl}_3$ ):  $\delta$  (ppm) 149.0, 146.7,

144.4, 132.1, 131.8, 131.2, 129.1, 128.6, 128.3, 127.5, 122.1, 121.7, 120.6, 120.1,

63.0, 48.7, 44.0, 42.9. HRMS-ESI exact mass calcd. for  $\text{C}_{22}\text{H}_{19}\text{NBr}_2^+$  ( $[\text{M}+\text{H}]^+$ ) requires  $m/z$  455.99570, found  $m/z$  455.99600.

The enantiomeric excess was determined by HPLC on Chiralcel OD-H column (hexane : isopropanol = 90 : 10, flowing rate = 1.0 mL/min, 25 °C, UV detection at  $\lambda = 254$  nm),  $t_{R1} = 7.4$  min (major),  $t_{R2} = 10.0$  min (minor).

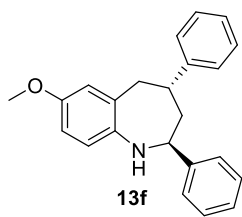

**(2*S*,4*S*)-7-methoxy-2,4-diphenyl-2,3,4,5-tetrahydro-1*H*-benzo-  
[b]azepi-ne (13f):** (New compound); yellow solid, m.p. 119-120

°C, 60% yield, dr = 11:1, 83% ee;  $[\alpha]_D^{20} = +17.6$  ( $c = 0.25$ ,  $\text{CHCl}_3$ );  $^1\text{H}$  NMR (500 MHz,  $\text{CDCl}_3$ ):  $\delta$  (ppm) 7.44-7.42 (m, 2H),

7.39-7.25 (m, 7H), 7.20-7.17 (m, 1H), 6.73-6.70 (m, 2H), 6.65-6.63 (m, 1H), 3.87 (d,  $J = 11.0$  Hz, 1H), 3.74 (s, 3H), 3.33 (t,  $J = 12.0$  Hz, 1H), 2.86 (d,  $J = 13.5$  Hz, 1H), 2.79 (t,  $J = 10.5$  Hz, 1H), 2.24-2.17 (m, 1H), 2.09 (d,  $J = 13.0$  Hz, 1H);  $^{13}\text{C}$  NMR (125 MHz,  $\text{CDCl}_3$ ):  $\delta$  (ppm) 154.8, 148.0, 145.7, 142.8, 134.6, 128.9, 128.7, 127.7, 126.8, 126.5, 126.3, 121.3, 116.5, 112.0, 64.1, 55.6, 49.3, 44.7, 43.0. HRMS-ESI exact mass calcd. for  $\text{C}_{23}\text{H}_{24}\text{NO}^+$  ( $[\text{M}+\text{H}]^+$ ) requires  $m/z$  330.18524, found  $m/z$  330.18550.

The enantiomeric excess was determined by HPLC on Chiralcel OD-H column (hexane : isopropanol = 90 : 10, flowing rate = 0.5 mL/min, 25 °C, UV detection at  $\lambda = 254$  nm),  $t_{\text{R}1} = 25.0$  min (major),  $t_{\text{R}2} = 28.2$  min (minor).

## (2) Asymmetric hydrogenation of 2,4-diaryl-3*H*-benzodiazepines

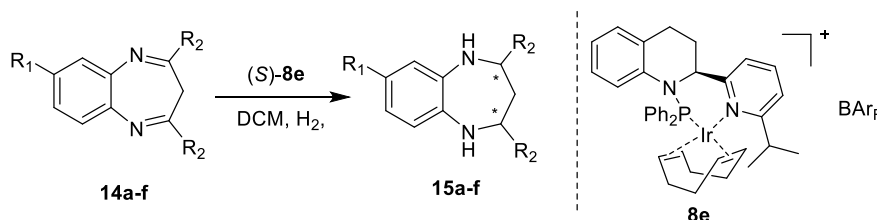

A 30 mL glass-lined stainless-steel reactor equipped with a magnetic stirrer bar was charged with Ir-catalyst (*S*)-**8e** (13.6 mg, 4.0 mol %) and substrate **14** (0.2 mmol) in DCM (2 mL) under nitrogen atmosphere in a glove box. The autoclave was closed, and the final pressure of the hydrogen gas was adjusted to 50 atm after purging the autoclave with hydrogen gas several times. The reaction mixture was stirred at 25 °C for 12 h. Then the hydrogen gas was carefully released and the conversion was determined by  $^1\text{H}$  NMR. The reaction mixture was filtered through a short pad of silica (petroleum/DCM, 2/1,  $v/v$ ) to give the pure products. The enantiomeric excess of the product was determined by HPLC with a chiral column. The analytical data of the product are summarized below.

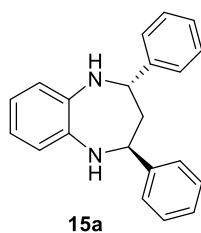

**(2*S*,4*S*)-2,4-diphenyl-2,3,4,5-tetrahydro-1*H*-1,5-benzodiazepine**

**(15a):** (Known compound, see: Z.-Y. Ding, F. Chen, J. Qin, Y.-M. He and Q.-H. Fan, *Angew. Chem., Int. Ed.* 2012, **51**, 5706); yellow solid, m.p. 137-141 °C, 95% yield, dr = 16:1, 99% ee;  $[\alpha]_{\text{D}}^{20} = -127.6$  ( $c = 0.25$ ,  $\text{CHCl}_3$ ), [Lit.<sup>8</sup>  $[\alpha]_{\text{D}}^{20} = -136.5$  ( $c = 1.0$ ,  $\text{CHCl}_3$ ), 99%

ee for (*S,S*) enantiomer]; <sup>1</sup>H NMR (500 MHz,  $\text{CDCl}_3$ ):  $\delta$  (ppm) 7.42 (d,  $J = 7.0$  Hz, 4H), 7.33 (t,  $J = 7.5$  Hz, 4H), 7.28-7.25 (m, 2H), 6.68-6.65 (m, 2H), 6.55-6.52 (m, 2H), 5.06 (t,  $J = 7.3$  Hz, 2H), 3.44 (s, 2H), 2.29 (t,  $J = 7.5$  Hz, 2H); <sup>13</sup>C NMR (125 MHz,  $\text{CDCl}_3$ ):  $\delta$  (ppm) 144.1, 138.2, 128.9, 127.7, 126.9, 120.7, 118.8, 59.1, 45.6.

The enantiomeric excess was determined by HPLC on Chiralcel OD-H column (hexane : isopropanol = 75 : 25, flowing rate = 1.0 mL/min, 25 °C, UV detection at  $\lambda = 254$  nm),  $t_{\text{R}1} = 6.5$  min (major),  $t_{\text{R}2} = 15.2$  min (minor).

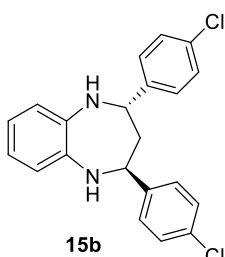

**(2*S*,4*S*)-2,4-bis(4-chlorophenyl)-2,3,4,5-tetrahydro-1*H*-1,5-benzodiazepine (15b):** (Known compound, see: Z.-Y. Ding, F. Chen, J.

Qin, Y.-M. He and Q.-H. Fan, *Angew. Chem., Int. Ed.* 2012, **51**, 5706); yellow solid, m.p. 172-176 °C, 92% yield, dr = 10:1, 97% ee;  $[\alpha]_{\text{D}}^{20} = -105.0$  ( $c = 0.25$ ,  $\text{CHCl}_3$ ), [Lit.<sup>8</sup>  $[\alpha]_{\text{D}}^{20} = -109.8$  ( $c =$

1.0,  $\text{CHCl}_3$ ), >99% ee for (*S,S*) enantiomer]; <sup>1</sup>H NMR (400 MHz,  $\text{CDCl}_3$ ):  $\delta$  (ppm) 7.36-7.29 (m, 8H), 6.71-6.68 (m, 2H), 6.59-6.56 (m, 2H), 4.96 (t,  $J = 7.2$  Hz, 2H), 3.40 (s, 2H), 2.22 (t,  $J = 7.4$  Hz, 2H); <sup>13</sup>C NMR (100 MHz,  $\text{CDCl}_3$ ):  $\delta$  (ppm) 142.5, 137.8, 133.4, 129.0, 128.3, 121.1, 119.1, 58.1, 45.2.

The enantiomeric excess was determined by HPLC on Chiralcel OD-H column (hexane : isopropanol = 75 : 25, flowing rate = 1.0 mL/min, 25 °C, UV detection at  $\lambda = 254$  nm),  $t_{\text{R}1} = 8.6$  min (major),  $t_{\text{R}2} = 28.3$  min (minor).

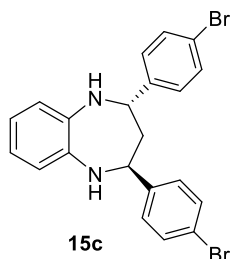

**(2*S*,4*S*)-2,4-bis(4-bromophenyl)-2,3,4,5-tetrahydro-1*H*-1,5-benzodiazepine (15c):** (Known compound, see: Z.-Y. Ding, F. Chen,

J. Qin, Y.-M. He and Q.-H. Fan, *Angew. Chem., Int. Ed.* 2012, **51**,



5706); yellow solid, m.p. 140-143 °C, 95% yield, dr > 20:1, 99% ee;  $[\alpha]_{\text{D}}^{20} = -115.2$  ( $c = 0.25$ ,  $\text{CHCl}_3$ ), [Lit.<sup>8</sup>  $[\alpha]_{\text{D}}^{20} = -106.2$  ( $c = 1.0$ ,  $\text{CHCl}_3$ ), 99% ee for (*S,S*) enantiomer]; <sup>1</sup>H NMR (400 MHz,  $\text{CDCl}_3$ ):  $\delta$  (ppm) 7.46 (d,  $J = 8.4$  Hz, 4H), 7.29 (d,  $J = 8.4$  Hz, 4H), 6.72-6.70 (m, 2H), 6.58-6.56 (m, 2H), 4.94 (t,  $J = 7.2$  Hz, 2H), 3.41 (s, 2H), 2.22 (t,  $J = 7.2$  Hz, 2H); <sup>13</sup>C NMR (100 MHz,  $\text{CDCl}_3$ ):  $\delta$  (ppm) 143.0, 137.8, 132.2, 128.7, 121.5, 121.1, 119.2, 58.2, 45.1.

The enantiomeric excess was determined by HPLC on Chiralcel OD-H column (hexane : isopropanol = 60 : 40, flowing rate = 0.9 mL/min, 25 °C, UV detection at  $\lambda = 254$  nm),  $t_{\text{R}1} = 9.8$  min (major),  $t_{\text{R}2} = 35.2$  min (minor).

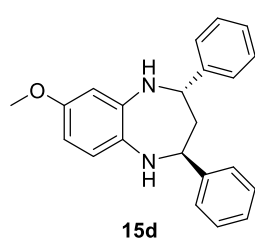

**(2*S*,4*S*)-7-methoxy-2,4-diphenyl-2,3,4,5-tetrahydro-1*H*-1,5-benzodiazepine (15d):** (Known compound, see: Z.-Y. Ding, F.

Chen, J. Qin, Y.-M. He and Q.-H. Fan, *Angew. Chem., Int. Ed.* 2012, **51**, 5706); yellow solid, m.p. 102-104 °C, 90% yield, dr >

20:1, 99% ee;  $[\alpha]_{\text{D}}^{20} = -63.1$  ( $c = 0.25$ ,  $\text{CHCl}_3$ ), [Lit.<sup>8</sup>  $[\alpha]_{\text{D}}^{20} =$

-76.1 ( $c = 1.0$ ,  $\text{CHCl}_3$ ), 97% ee for (*S,S*) enantiomer]; <sup>1</sup>H NMR (400 MHz,  $\text{CDCl}_3$ ):  $\delta$  (ppm) 7.41 (d,  $J = 7.2$  Hz, 4H), 7.33 (t,  $J = 7.2$  Hz, 4H), 7.27-7.24 (m, 2H), 6.48 (d,  $J = 8.4$  Hz, 1H), 6.26-6.24 (m, 1H), 6.15 (d,  $J = 2.0$  Hz, 1H), 5.06 (dd,  $J_1 = 10.0$  Hz,  $J_2 = 4.4$  Hz, 1H), 4.88 (dd,  $J_1 = 9.2$  Hz,  $J_2 = 4.8$  Hz, 1H), 3.67 (s, 3H), 3.35 (s, 2H), 2.36-2.22 (m, 2H); <sup>13</sup>C NMR (100 MHz,  $\text{CDCl}_3$ ):  $\delta$  (ppm) 154.6, 144.4, 144.2, 139.5, 131.7, 128.9, 128.9, 127.7, 127.6, 126.9, 126.9, 119.9, 105.3, 104.7, 59.5, 58.5, 55.6, 45.6.

The enantiomeric excess was determined by HPLC on Chiralcel OD-H column (hexane : isopropanol = 60 : 40, flowing rate = 0.9 mL/min, 25 °C, UV detection at  $\lambda = 254$  nm),  $t_{\text{R}1} = 8.5$  min (major),  $t_{\text{R}2} = 24.8$  min (minor).

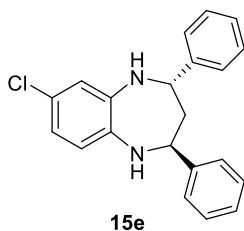

**(2*S*,4*S*)-7-chloro-2,4-diphenyl-2,3,4,5-tetrahydro-1*H*-1,5-benzodiazepine (15e):** (Known compound, see: Z.-Y. Ding, F. Chen, J. Qin, Y.-M. He and Q.-H. Fan, *Angew. Chem., Int. Ed.* 2012, **51**,

5706); yellow solid, m.p. 118-120 °C, 93% yield, dr > 20:1, 99% ee;  $[\alpha]_{\text{D}}^{20} = -75.2$  ( $c = 0.25$ ,  $\text{CHCl}_3$ ), [Lit.<sup>8</sup>  $[\alpha]_{\text{D}}^{20} = -79.8$  ( $c = 1.0$ ,  $\text{CHCl}_3$ ), 99% ee for (*S,S*) enantiomer];  $^1\text{H}$  NMR (400 MHz,  $\text{CDCl}_3$ ):  $\delta$  (ppm) 7.39-7.26 (m, 11H), 6.59 (d,  $J = 8.0$  Hz, 1H), 6.48 (d,  $J = 1.6$  Hz, 1H), 6.41 (d,  $J = 8.4$  Hz, 1H), 5.04-4.95 (m, 2H), 3.41 (s, 2H), 2.29-2.26 (m, 2H);  $^{13}\text{C}$  NMR (100 MHz,  $\text{CDCl}_3$ ):  $\delta$  (ppm) 143.8, 143.7, 139.4, 136.8, 129.0, 129.0, 127.9, 127.9, 126.9, 125.1, 120.1, 119.7, 118.3, 59.0, 58.8, 45.2.

The enantiomeric excess was determined by HPLC on Chiralcel OD-H column (hexane : isopropanol = 85 : 15, flowing rate = 1.0 mL/min, 25 °C, UV detection at  $\lambda = 254$  nm),  $t_{\text{R}1} = 7.7$  min (major),  $t_{\text{R}2} = 15.9$  min (minor).

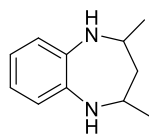

**2,4-dimethyl-2,3,4,5-tetrahydro-1*H*-1,5-benzodiazepine (15f):**

(Known compound, see: Z.-Y. Ding, F. Chen, J. Qin, Y.-M. He and Q.-H. Fan, *Angew. Chem., Int. Ed.* 2012, **51**, 5706); yellow oil, 94% yield, dr =

2:1 (*cis* : *trans*), 10% ee;  $[\alpha]_{\text{D}}^{20} = -9.1$  ( $c = 0.25$ ,  $\text{CHCl}_3$ ), [Lit.<sup>8</sup>  $[\alpha]_{\text{D}}^{20} = -32.4$  ( $c = 0.25$ ,  $\text{CHCl}_3$ ), 99% ee for (*R,R*) enantiomer];  $^1\text{H}$  NMR (500 MHz,  $\text{CDCl}_3$ ):  $\delta$  (ppm) 6.78-6.72 (m, 4H), 6.67-6.65 (m, 1H), 6.57-6.55 (m, 1H), 3.79-3.75 (m, 1H), 3.34 (s, 3H), 2.85-2.79 (m, 2H), 1.71-1.64 (m, 2H), 1.46-1.39 (m, 1H), 1.29 (d,  $J = 6.5$  Hz, 6H), 1.17 (d,  $J = 6.5$  Hz, 4H);  $^{13}\text{C}$  NMR (100 MHz,  $\text{CDCl}_3$ ):  $\delta$  (ppm) 140.3, 138.5, 121.5, 120.6, 120.5, 119.1, 52.8, 49.0, 48.2, 46.0, 24.1, 22.1.

The enantiomeric excess was determined by HPLC on Chiralcel OD-H column (hexane : isopropanol = 75 : 25, flowing rate = 1.0 mL/min, 25 °C, UV detection at  $\lambda = 254$  nm),  $t_{\text{R}1} = 6.9$  min (minor),  $t_{\text{R}2} = 10.7$  min (major).

## 10. Determination of absolute configuration

The absolute configuration of **7g** was determined to be (*S*) based on single crystal X-ray analysis (*Scheme S1*). The configuration of the other chiral products are assigned by analogy.

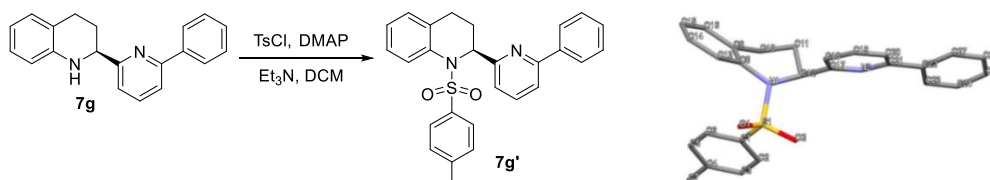

*Scheme S1*: Single crystal structure of **7g'**

The absolute configuration of **8f-g** and **8m** were determined to be (*S*) based on single crystal X-ray analysis (*Figure S1*). The configuration of the other chiral products (**8d**, **8e**) are assigned by analogy.

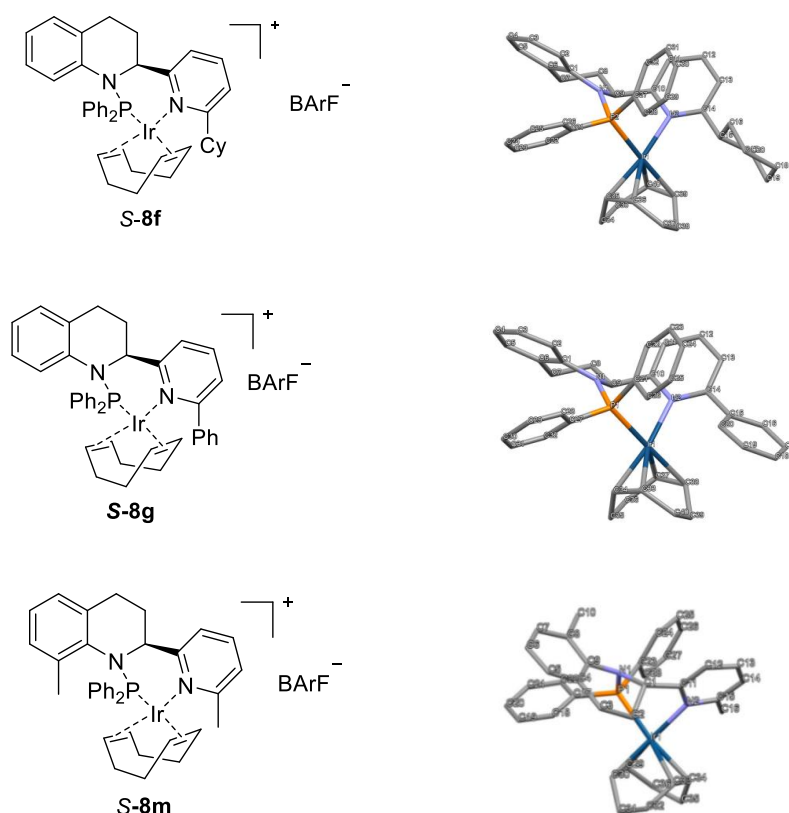

*Figure S1*. Single crystal structure of **8f-g** and **8m**

The absolute configuration of **12c** was determined to be (2*S*) based on single crystal X-ray analysis (*Figure S2*). The configuration of the other chiral products (**12a**, **12b**, **12d**, **12e**, **12f**) are assigned by analogy.

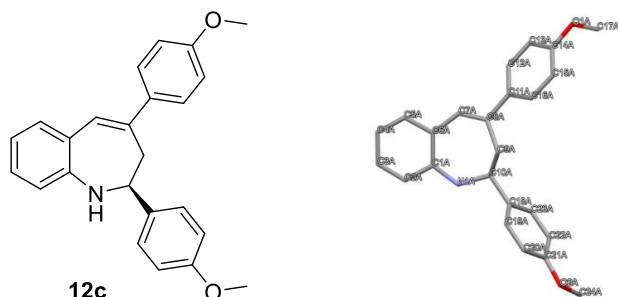

*Figure S2.* Single crystal structure of **12c**

The absolute configuration of **13c** was determined to be (2*S*,4*S*) based on the absolute configuration of **12c** in combination with 2D-NOESY spectrum (*Scheme S2*). The configuration of the other chiral products (**13a**, **13b**, **13d**, **13e**, **13f**) are assigned by analogy.

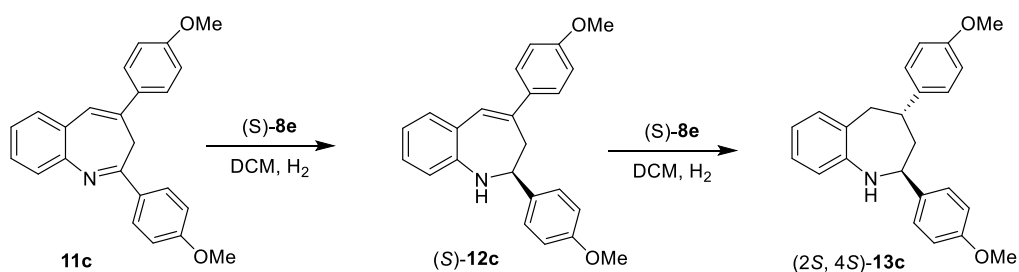

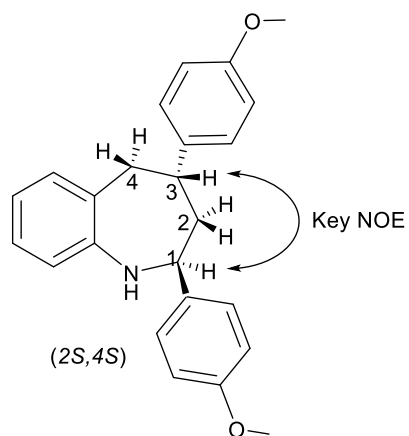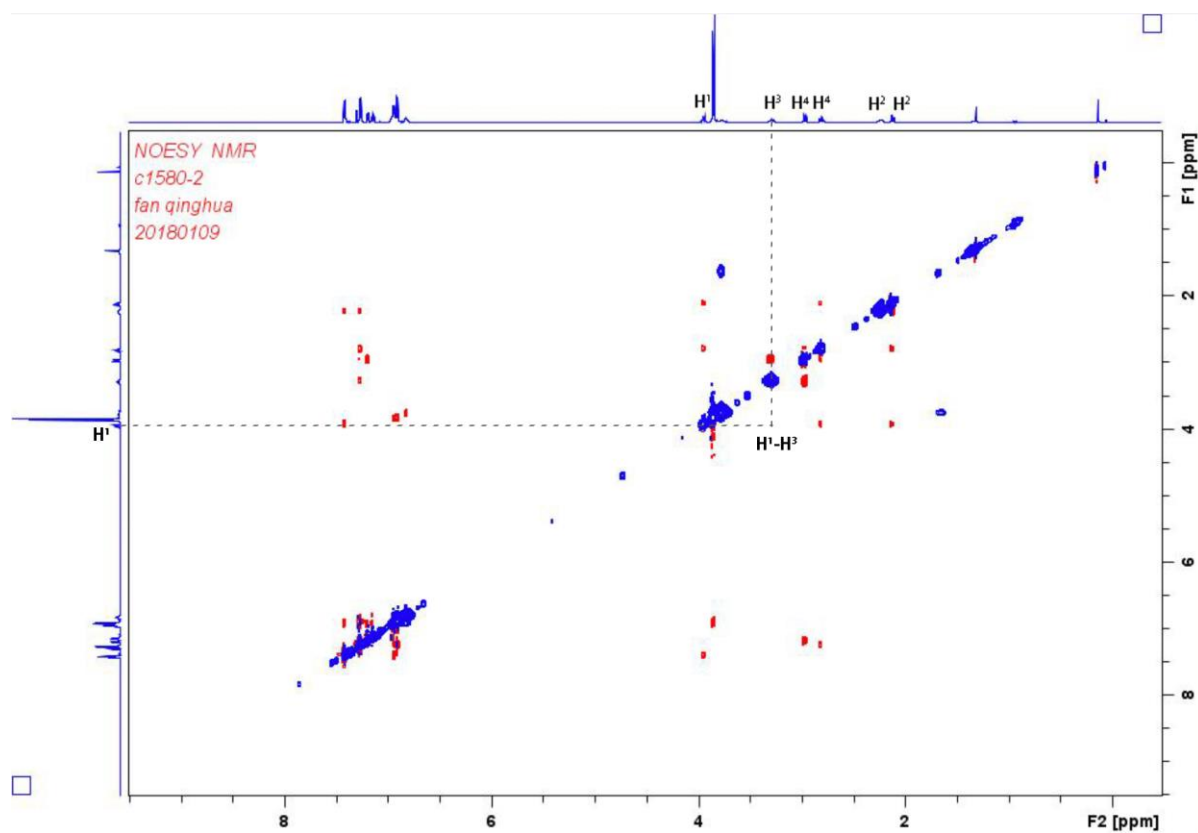

Scheme S2. The 2D-NOESY Spectrum of **13c**

## 11. References

- [1] (a) T. Ohkuma, N. Utsumi, K. Tsutsumi, K. Murata, C. Sandoval and R. Noyori, *J. Am. Chem. Soc.*, 2006, **128**, 8724; (b) T.-L. Wang, L.-G. Zhuo, Z. Li, F. Chen, Z. Ding, Y.-M. He, Q.-H. Fan, J.-F. Xiang, Z.-X. Yu and A. S. C. J. Chan, *Am. Chem. Soc.*, 2011, **133**, 9878; (c) Z.-Y. Ding, F. Chen, J. Qin, Y.-M. He and Q.-H. Fan, *Angew. Chem., Int. Ed.*, 2012, **51**, 5706.
- [2] (a) J. Haginiwa, Y. Higuchi, T. Kawashima and T. Goto, *Yakugaku Zasshi*, 1975, **95**, 204; (b) L.-Y. Xi, R.-Y. Zhang, L. Zhang, S.-Y. Chen and X.-Q. Yu, *Org. Biomol. Chem.*, 2015, **13**, 3942; (c) J. Uenishi, T. Tanaka, K. Nishiwaki, W. Wakabayashi, S. Oae and H. Tsukube, *J. Org. Chem.*, 1993, **58**, 4382; (d) X.-L. Cui and R. S. Brown, *J. Org. Chem.*, 2000, **65**, 5653; (e) N. Katrin, K. Vasily, K. Gerald, E. Gerhard and F. Roland, *Eur. J. Inorg. Chem.*, 2006, 366.; (f) T. C. Colin and L. D. Paula, *J. Am. Chem. Soc.*, 2008, **24**, 7558; (g) C. Demerson, L. Humber and A. Philipp, *J. Med. Chem.*, 1976, **19**, 391; (h) F. Zhai and R. Jordan, *Organometallics*, 2014, **33**, 7176; (i) Y.-L. Zhao, Y. Li, S.-M. Li, Y.-G. Zhou, F.-Y. Sun, L.-X. Gao and F.-S. Han, *Adv. Synth. Catal.*, 2011, **353**, 1543.
- [3] Z.-H. Lu, N. Eva and P. Andreas, *Eur. J. Org. Chem.*, 2007, 4189.
- [4] C.-J. Hou, W.-L. Guo, X.-P. Hu, J. Deng and Z. Zheng, *Tetrahedron: Asymmetry*, 2011, **22**, 195.
- [5] R. D. Broene and S. L. Buchwald, *J. Am. Chem. Soc.*, 1993, **115**, 12569.
- [6] (a) K. Ramig, S. Alli, M. Cheng, M. Leung, R. Razi, M. Washington and L. Kudzma, *Synlett* 2007, **18**, 2868; (b) I. L. Finar, *J. Chem. Soc.*, 1958, 4904.
- [7] Z.-S. Yang, Z.-Y. Ding, F. Chen, Y.-M. He, N.-F. Yang and Q.-H. Fan, *Eur. J. Org. Chem.*, 2017, 1973.
- [8] Z.-Y. Ding, F. Chen, J. Qin, Y.-M. He and Q.-H. Fan, *Angew. Chem., Int. Ed.* 2012, **51**, 1

## 12. Copy of NMR spectra

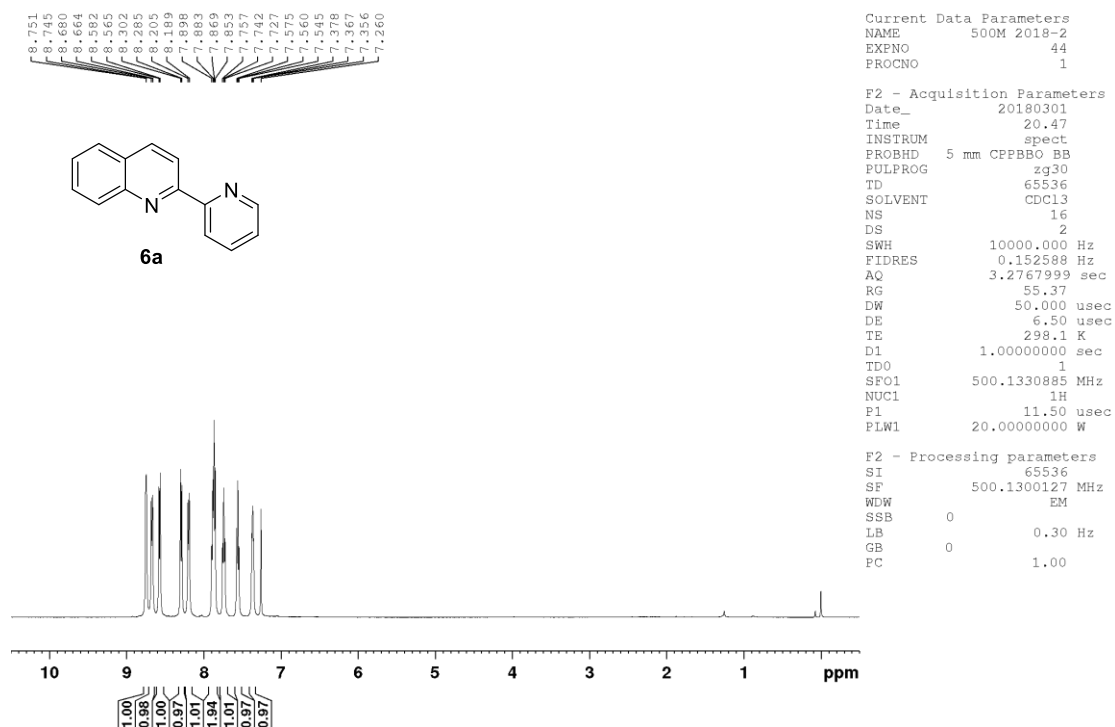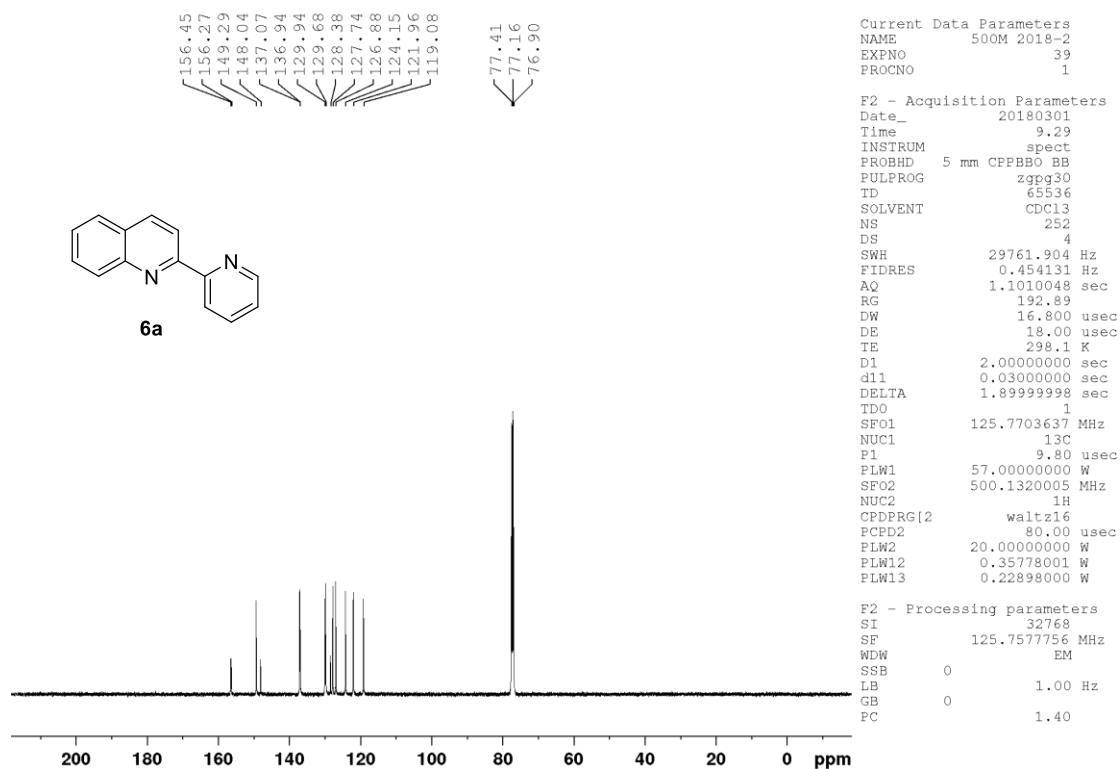

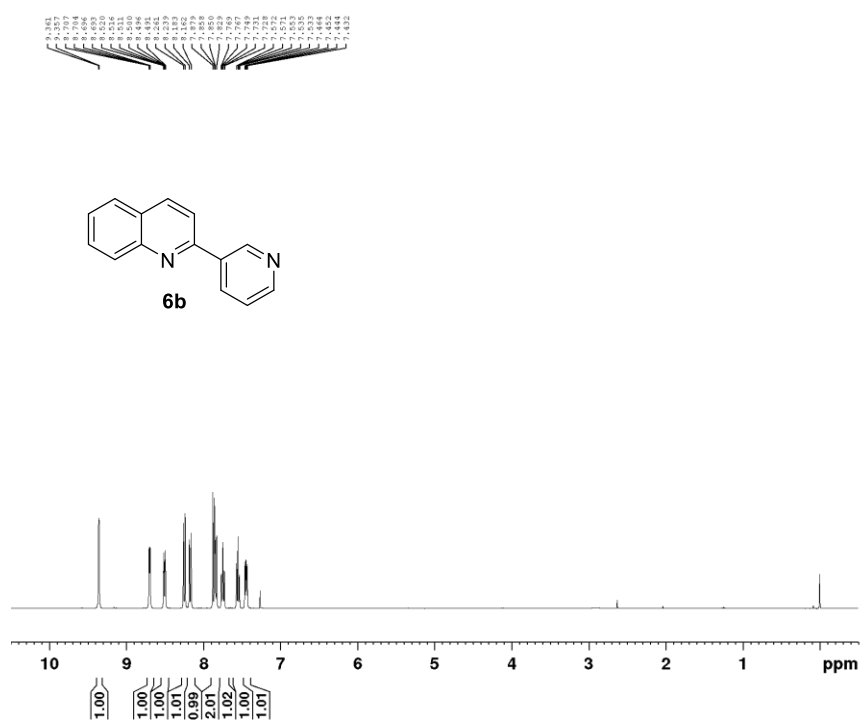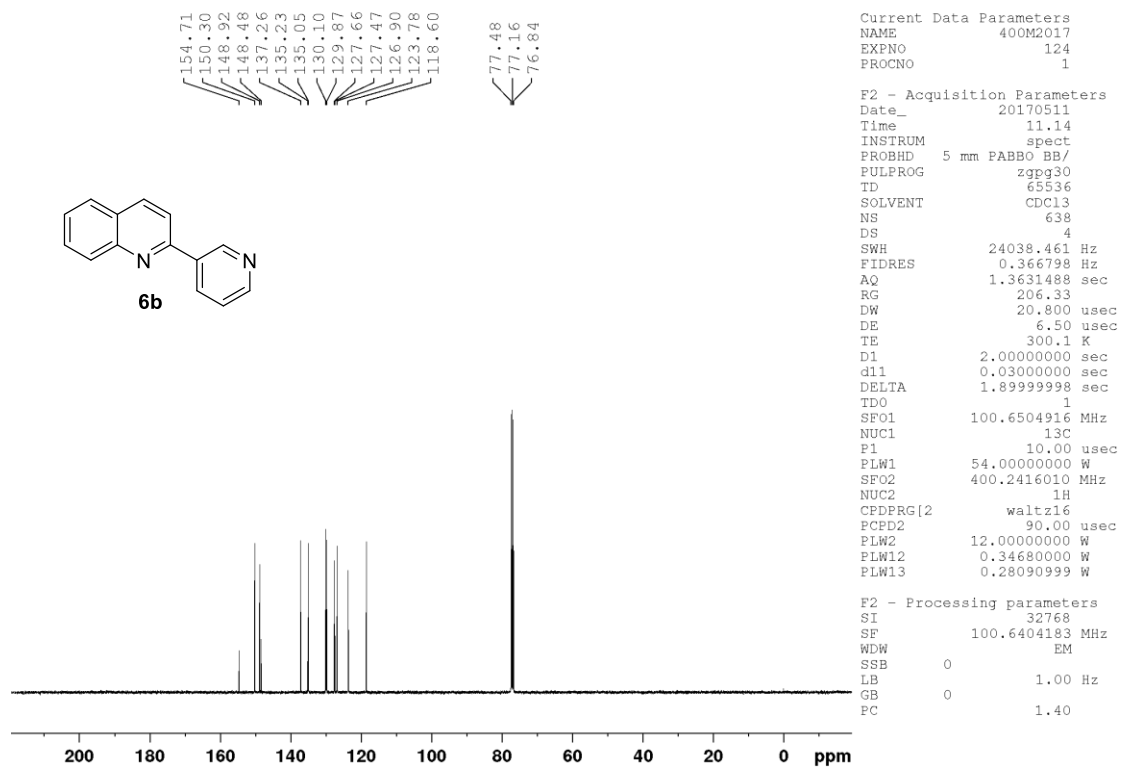



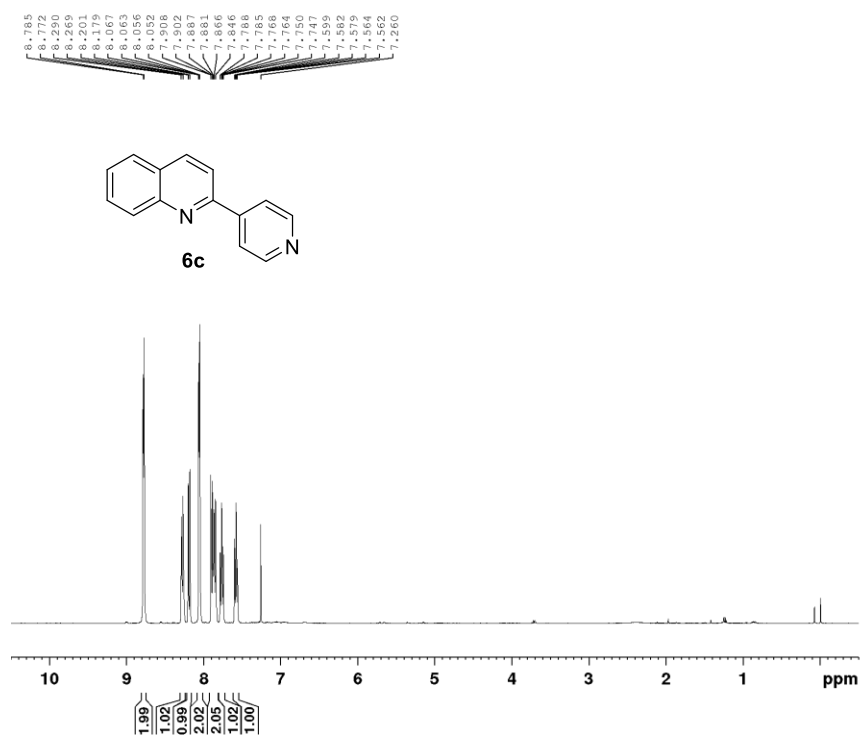

Current Data Parameters  
NAME 400M 2018  
EXPNO 319  
PROCNO 1

F2 - Acquisition Parameters  
Date\_ 20180302  
Time 9.35  
INSTRUM spect  
PROBHD 5 mm PABBO BB/  
PULPROG zg30  
TD 32768  
SOLVENT CDCl3  
NS 16  
DS 0  
SWH 8012.820 Hz  
FIDRES 0.244532 Hz  
AQ 2.0447233 sec  
RG 206.33  
DW 62.400 usec  
DE 6.50 usec  
TE 297.9 K  
D1 2.00000000 sec  
TD0 1  
SFO1 400.2424716 MHz  
NUC1 1H  
P1 14.80 usec  
PLW1 12.00000000 W

F2 - Processing parameters  
SI 65536  
SF 400.2400100 MHz  
WDW EM  
SSB 0  
LB 0.30 Hz  
GB 0  
PC 1.00

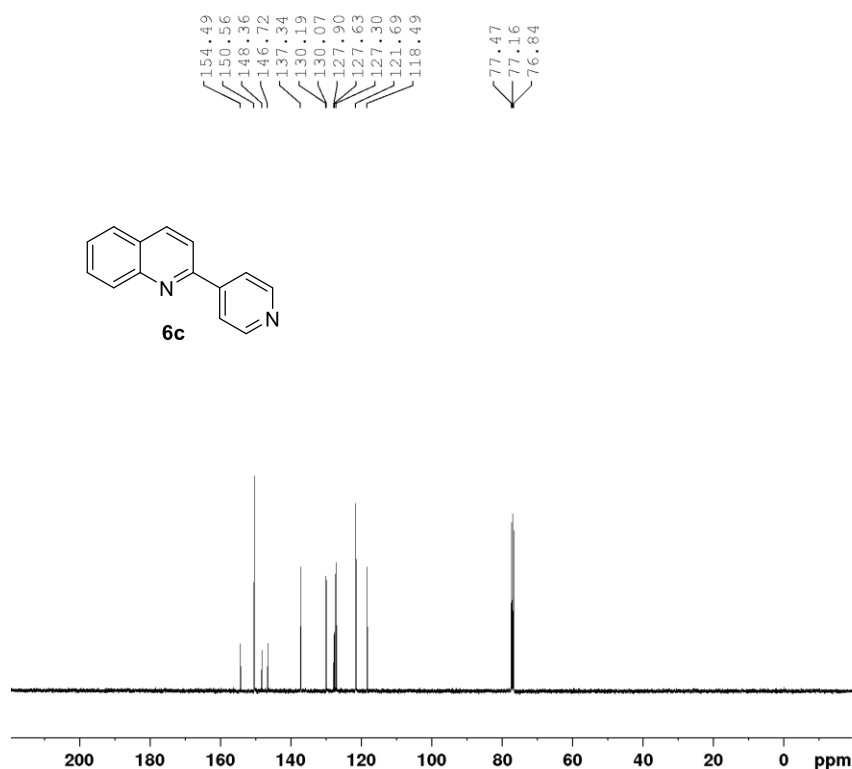

Current Data Parameters  
NAME 400M2017  
EXPNO 126  
PROCNO 1

F2 - Acquisition Parameters  
Date\_ 20170511  
Time 11.54  
INSTRUM spect  
PROBHD 5 mm PABBO BB/  
PULPROG zgpg30  
TD 65536  
SOLVENT CDCl3  
NS 101  
DS 4  
SWH 24038.461 Hz  
FIDRES 0.366798 Hz  
AQ 1.3631488 sec  
RG 206.33  
DW 20.800 usec  
DE 6.50 usec  
TE 299.6 K  
D1 2.00000000 sec  
d11 0.03000000 sec  
DELTA 1.89999998 sec  
TD0 1  
SFO1 100.6504916 MHz  
NUC1 13C  
P1 10.00 usec  
PLW1 54.00000000 W  
SFO2 400.2416010 MHz  
NUC2 1H  
CPDPRG[2] waltz16  
PCPD2 90.00 usec  
PLW2 12.00000000 W  
PLW12 0.34680000 W  
PLW13 0.28090999 W

F2 - Processing parameters  
SI 32768  
SF 100.6404205 MHz  
WDW EM  
SSB 0  
LB 1.00 Hz  
GB 0  
PC 1.40

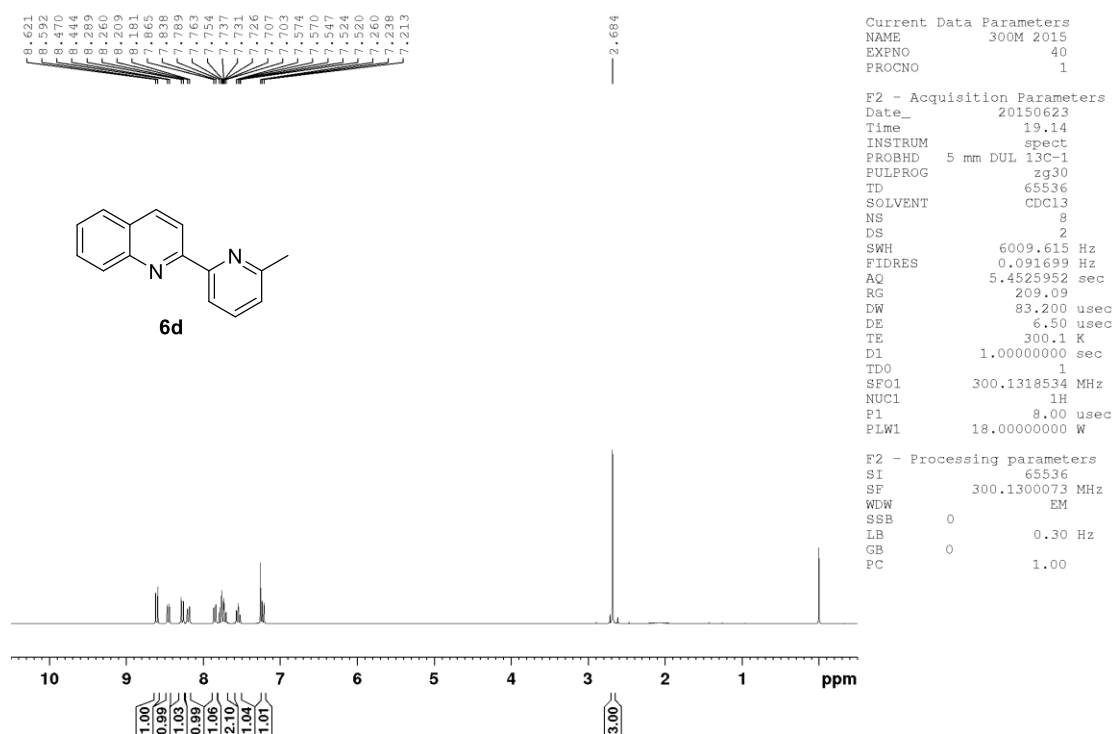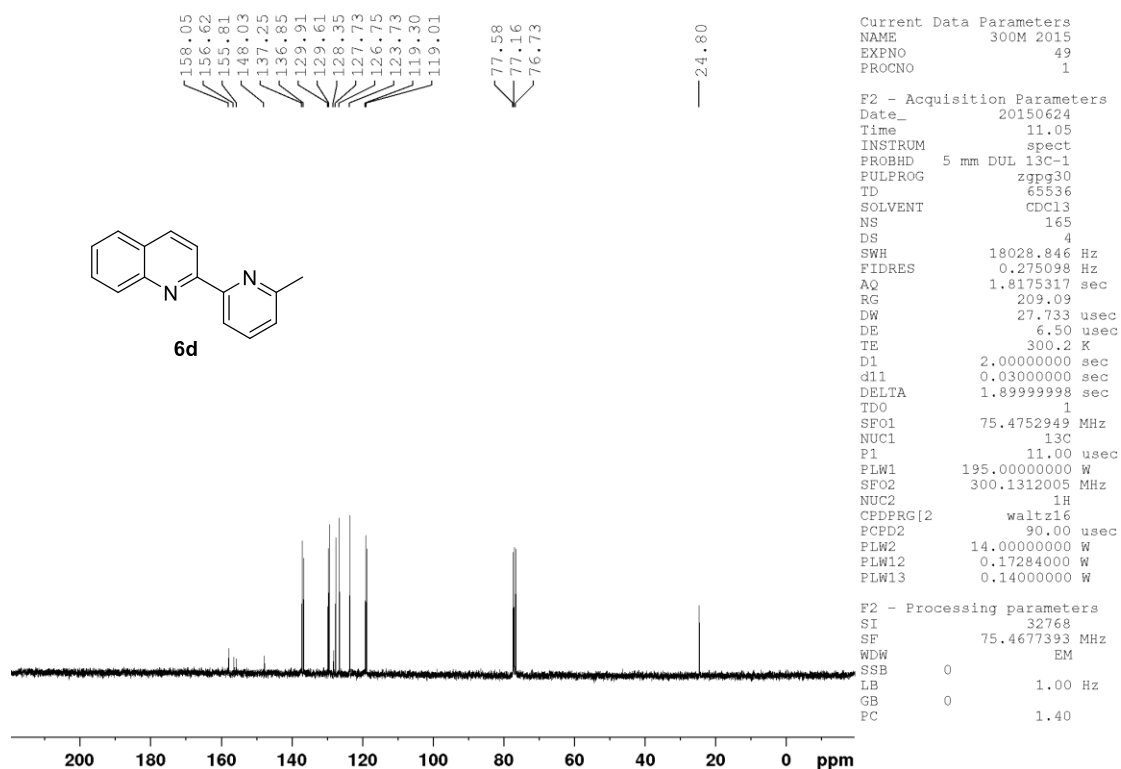

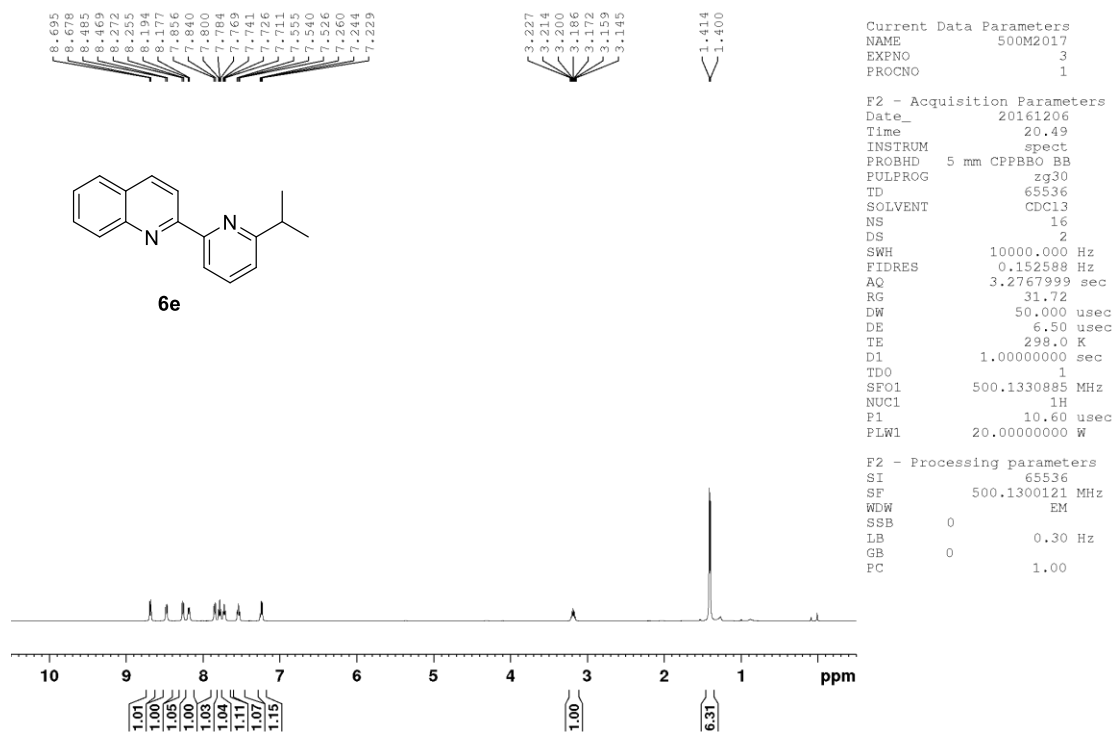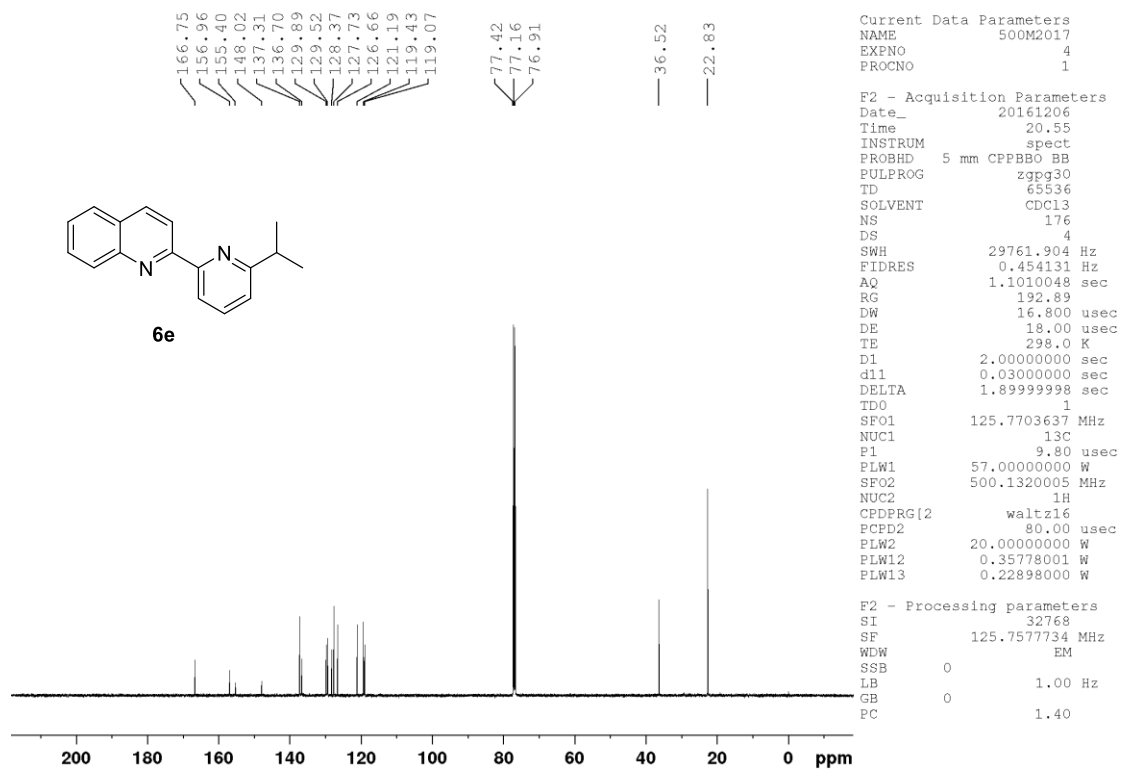

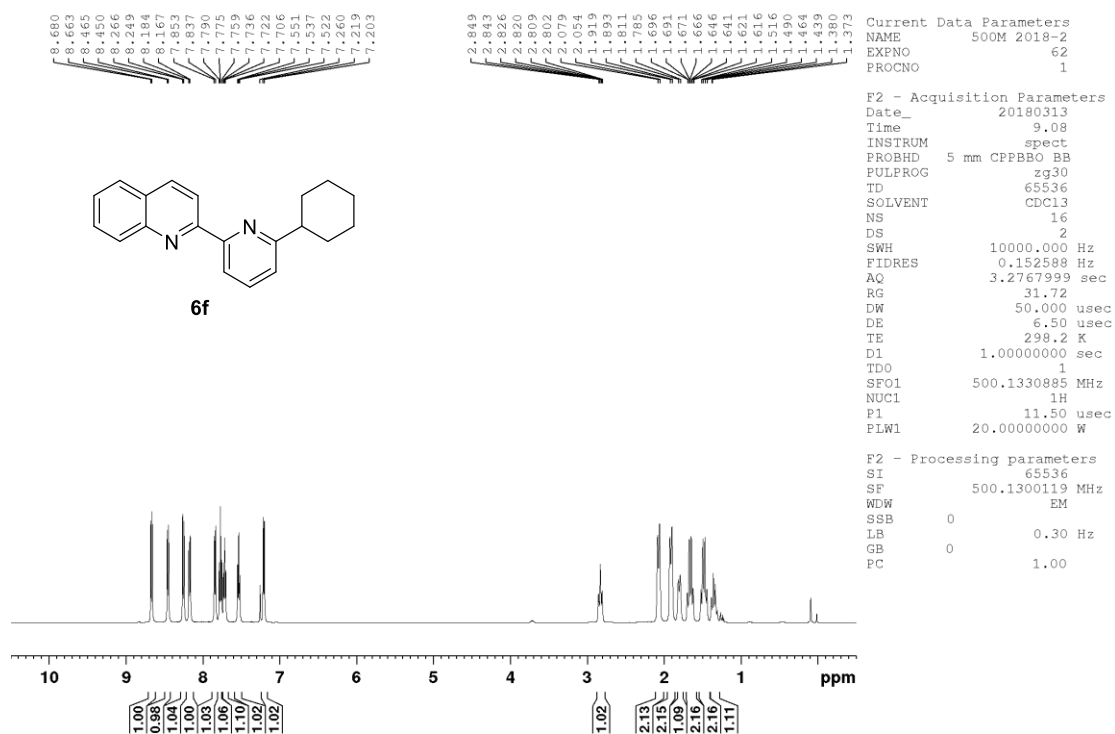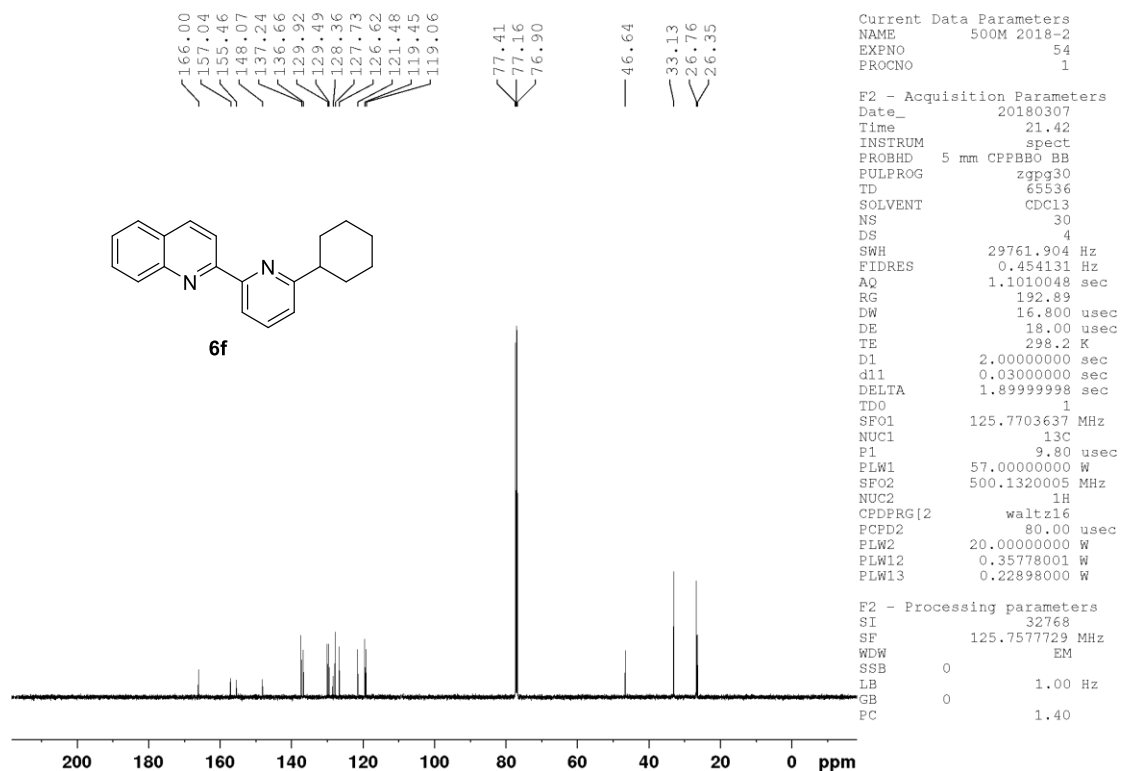

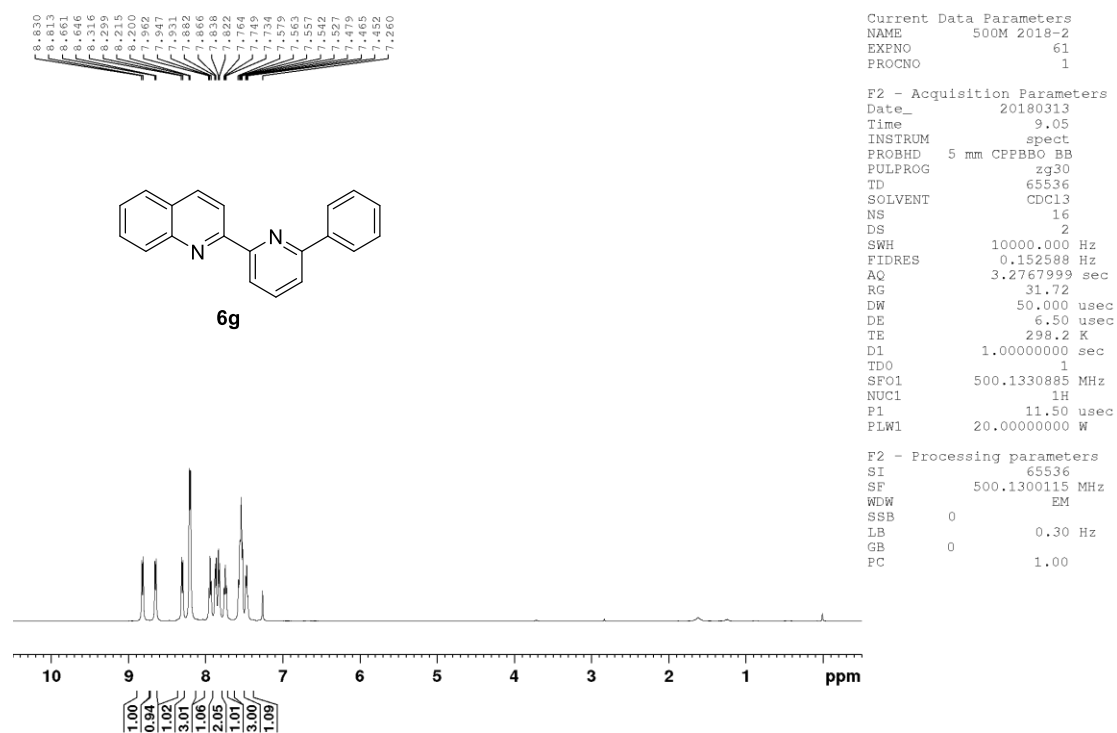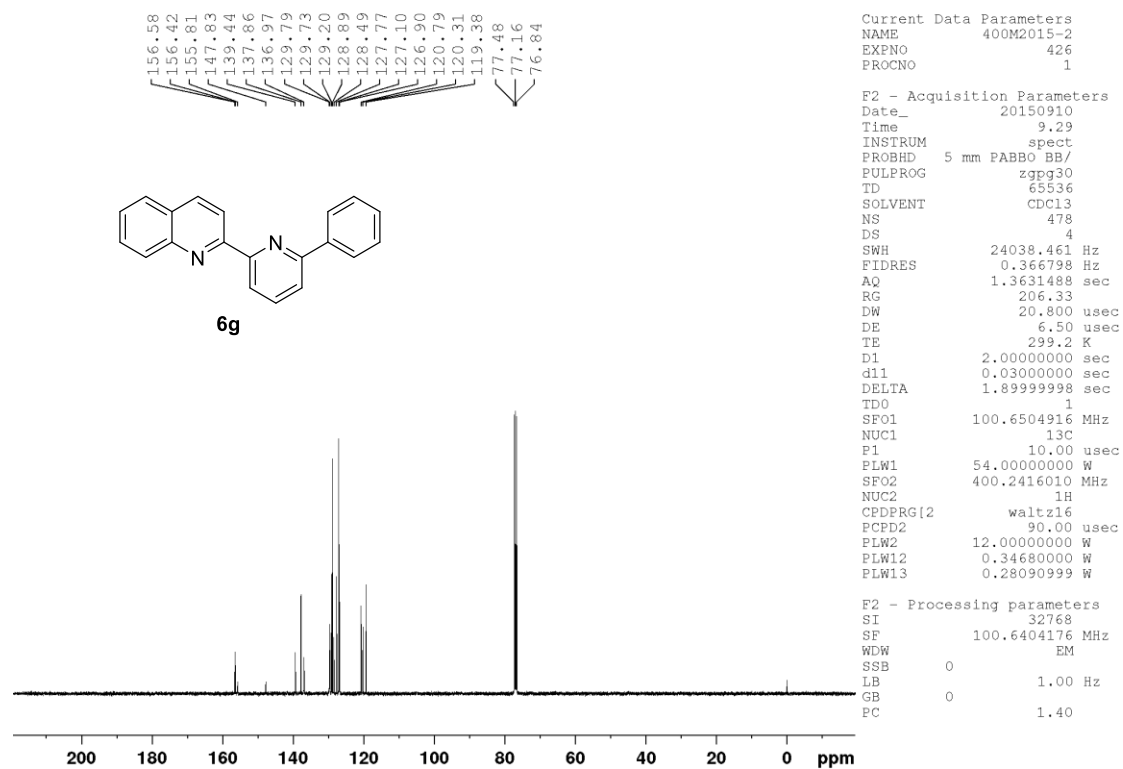

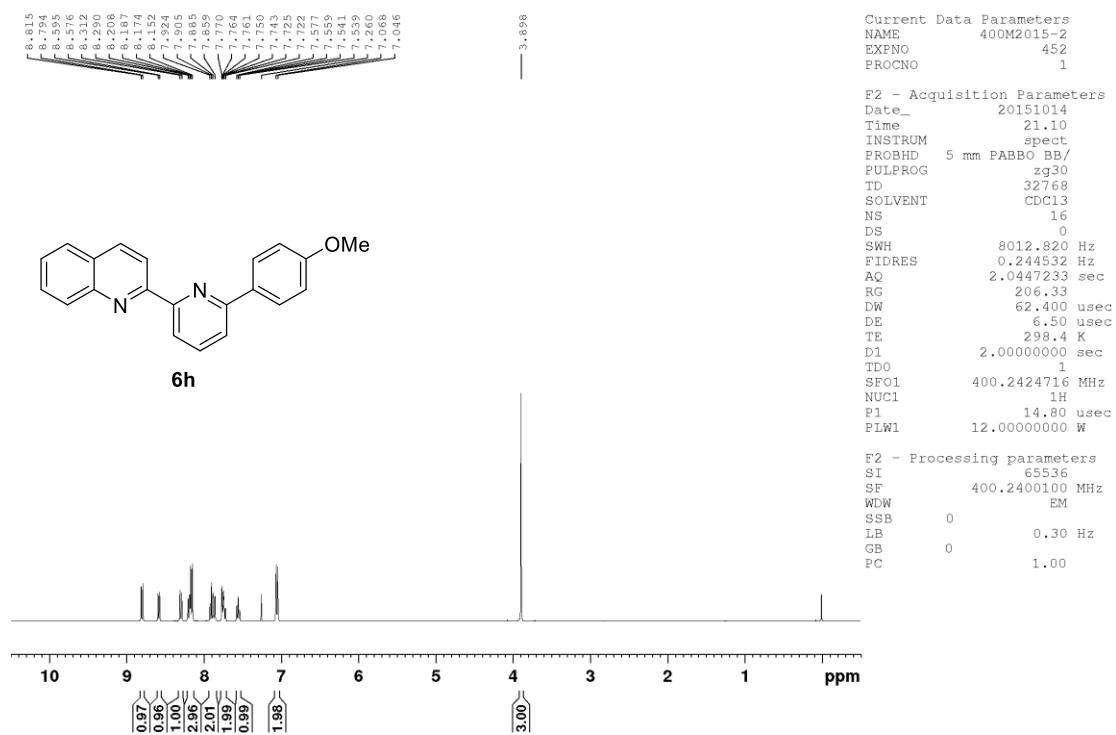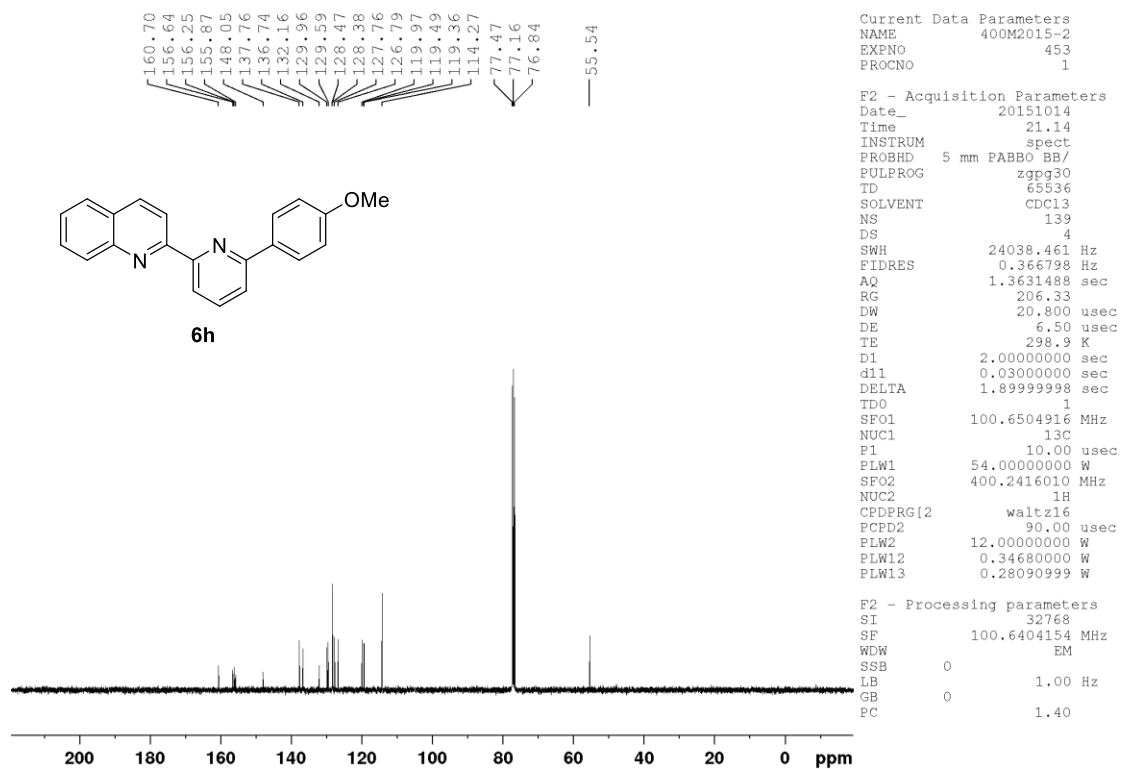

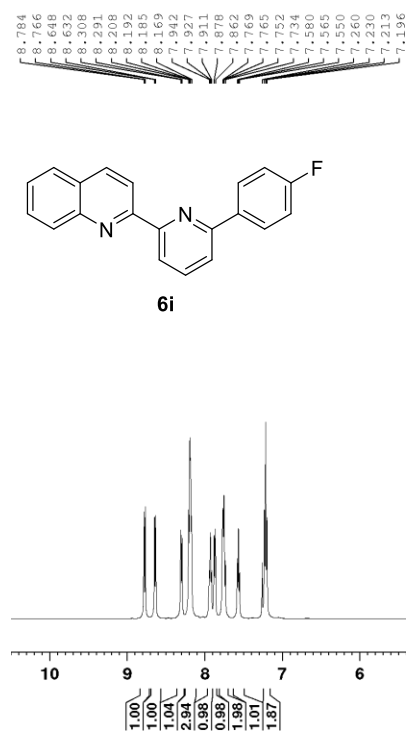

Current Data Parameters  
NAME 500M 2016C°  
EXPNO 48  
PROCNO 1

F2 - Acquisition Parameters  
Date\_ 20151017  
Time 15.49  
INSTRUM spect  
PROBHD 5 mm CPPBBO BB  
PULPROG zg30  
TD 65536  
SOLVENT CDCl3  
NS 16  
DS 2  
SWH 10000.000 Hz  
FIDRES 0.152588 Hz  
AQ 3.2767999 sec  
RG 49.27  
DW 50.000 usec  
DE 6.50 usec  
TE 298.0 K  
D1 1.00000000 sec  
TDO 1  
SFO1 500.1330885 MHz  
NUC1 1H  
P1 10.60 usec  
PLW1 20.00000000 W

F2 - Processing parameters  
SI 65536  
SF 500.1300121 MHz  
WDW EM  
SSB 0  
LB 0.30 Hz  
GB 0  
PC 1.00

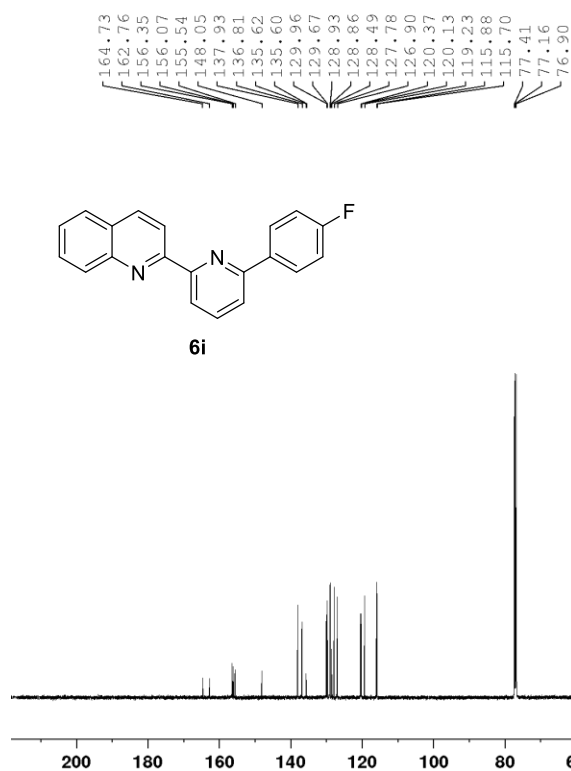

Current Data Parameters  
NAME 500M 2016C°  
EXPNO 49  
PROCNO 1

F2 - Acquisition Parameters  
Date\_ 20151017  
Time 15.53  
INSTRUM spect  
PROBHD 5 mm CPPBBO BB  
PULPROG zgpg30  
TD 65536  
SOLVENT CDCl3  
NS 97  
DS 4  
SWH 29761.904 Hz  
FIDRES 0.454131 Hz  
AQ 1.1010048 sec  
RG 192.89  
DW 16.800 usec  
DE 18.00 usec  
TE 298.0 K  
D1 2.00000000 sec  
d11 0.03000000 sec  
DELTA 1.89999998 sec  
TDO 1  
SFO1 125.7703637 MHz  
NUC1 13C  
P1 9.80 usec  
PLW1 57.00000000 W  
SFO2 500.1320005 MHz  
NUC2 1H  
CPDPRG[2] waltz16  
PCPD2 80.00 usec  
PLW2 20.00000000 W  
PLW12 0.35778001 W  
PLW13 0.22898000 W

F2 - Processing parameters  
SI 32768  
SF 125.7577738 MHz  
WDW EM  
SSB 0  
LB 1.00 Hz  
GB 0  
PC 1.40

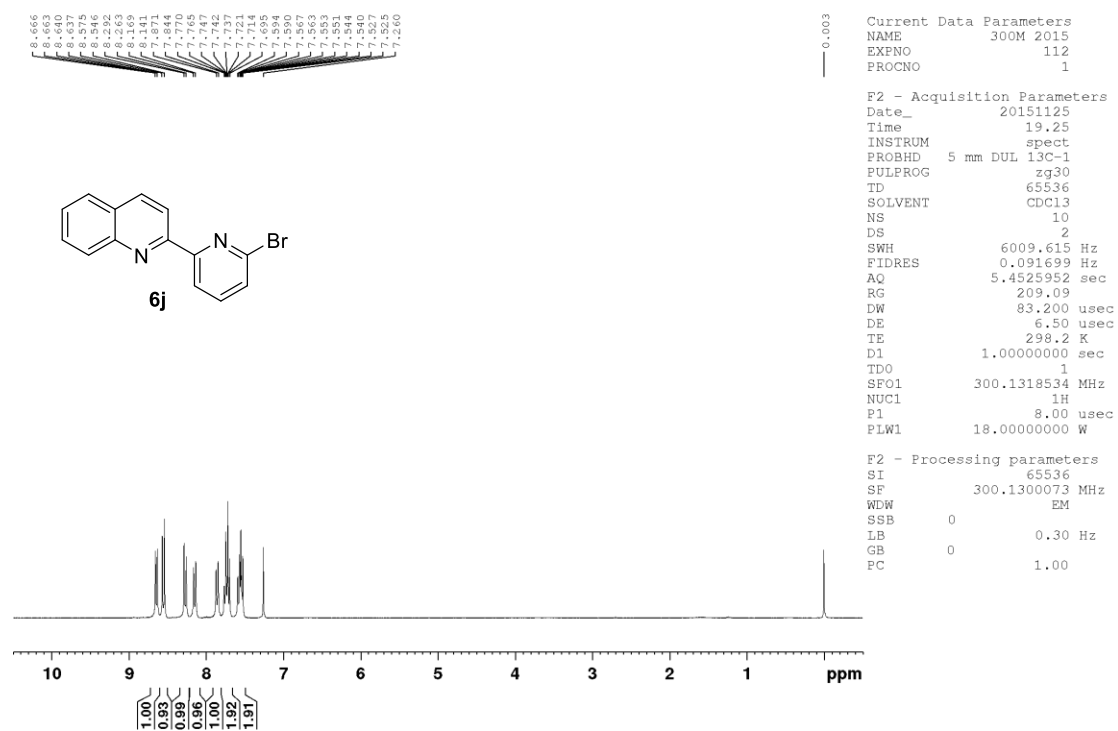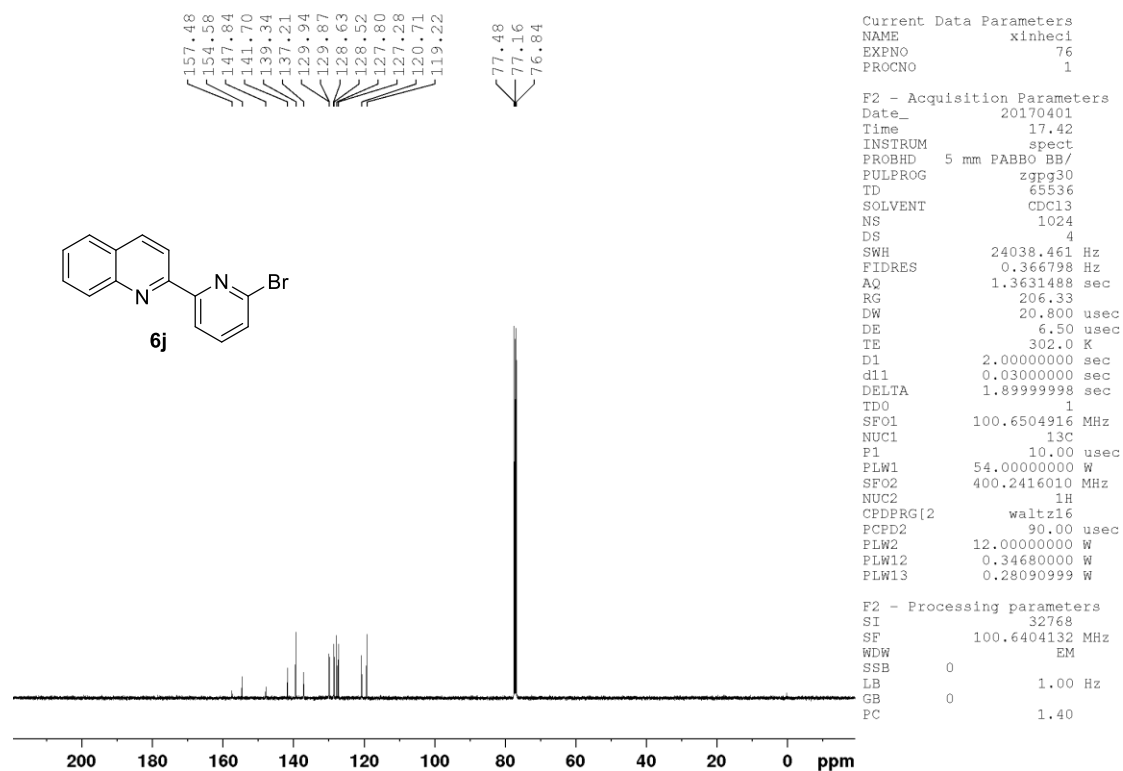



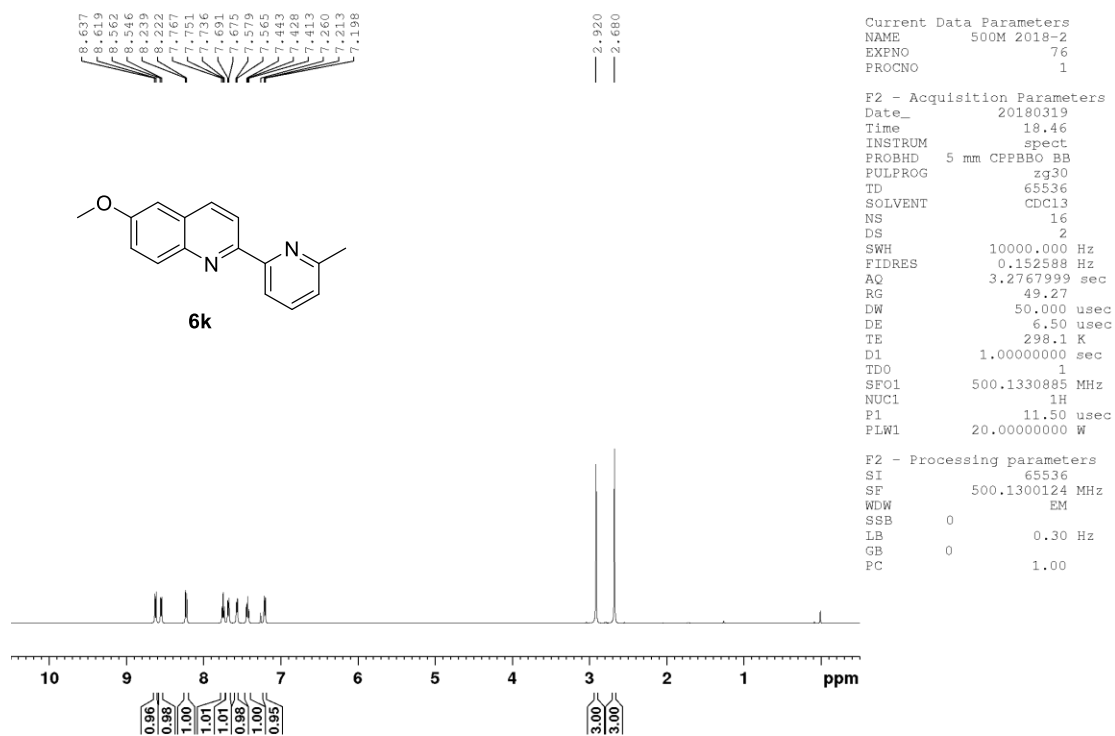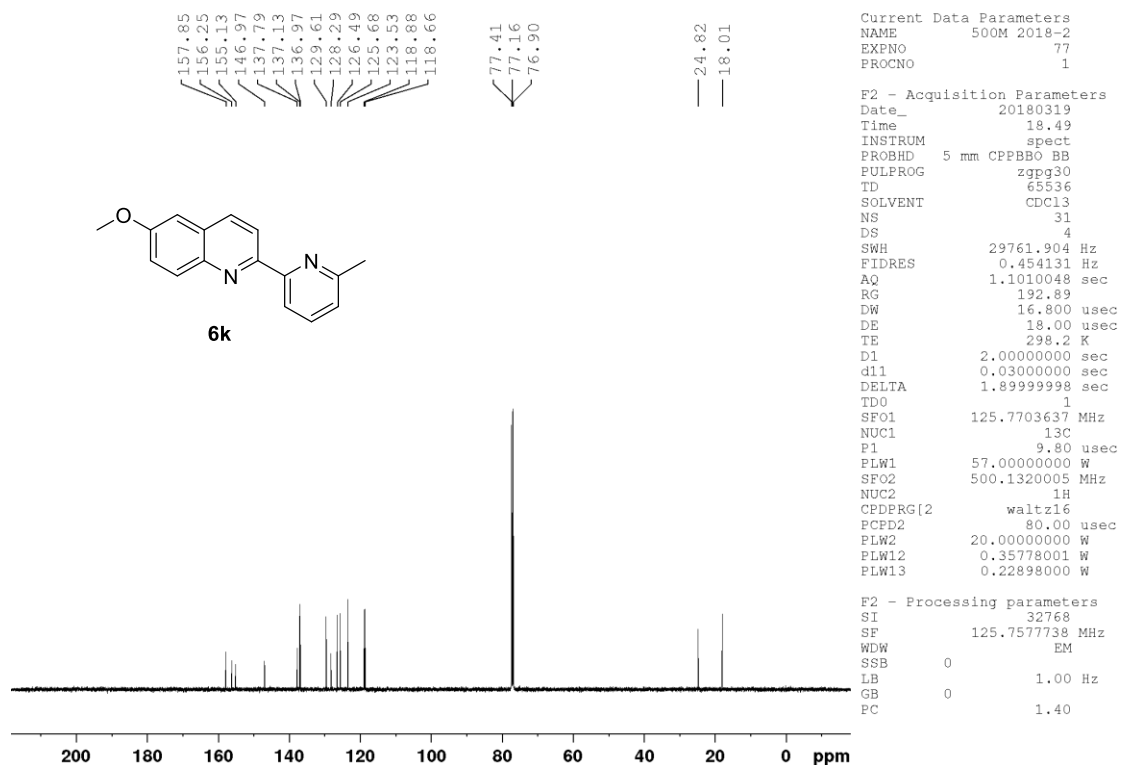

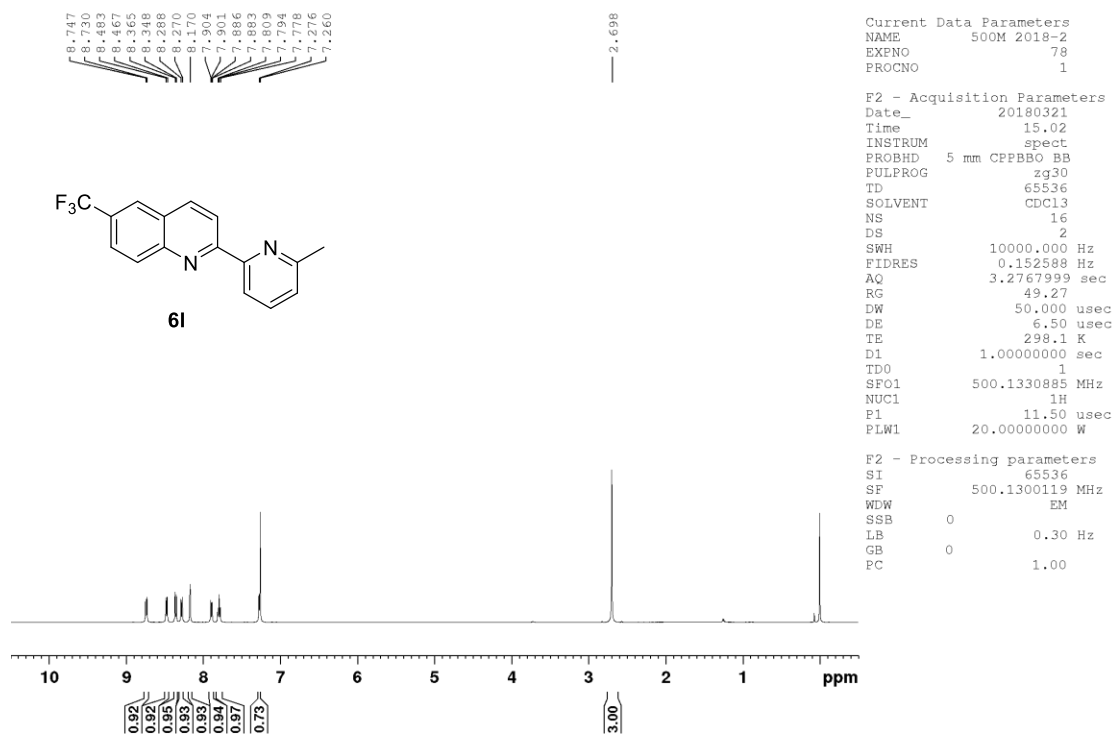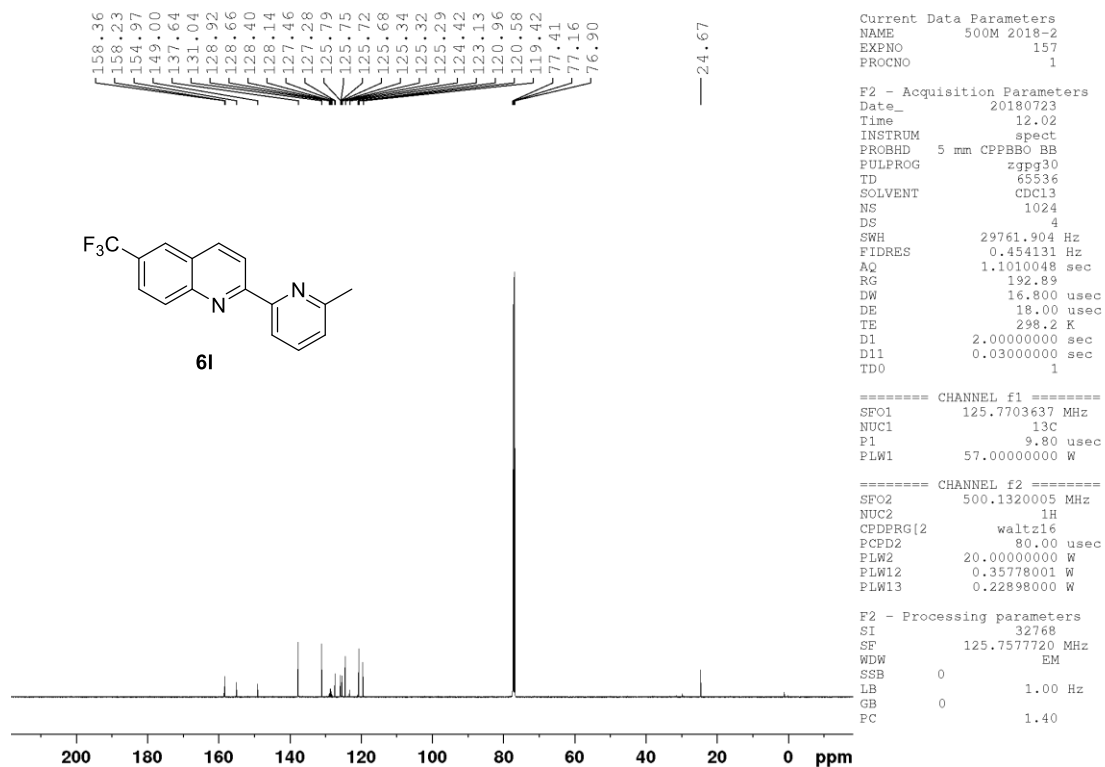

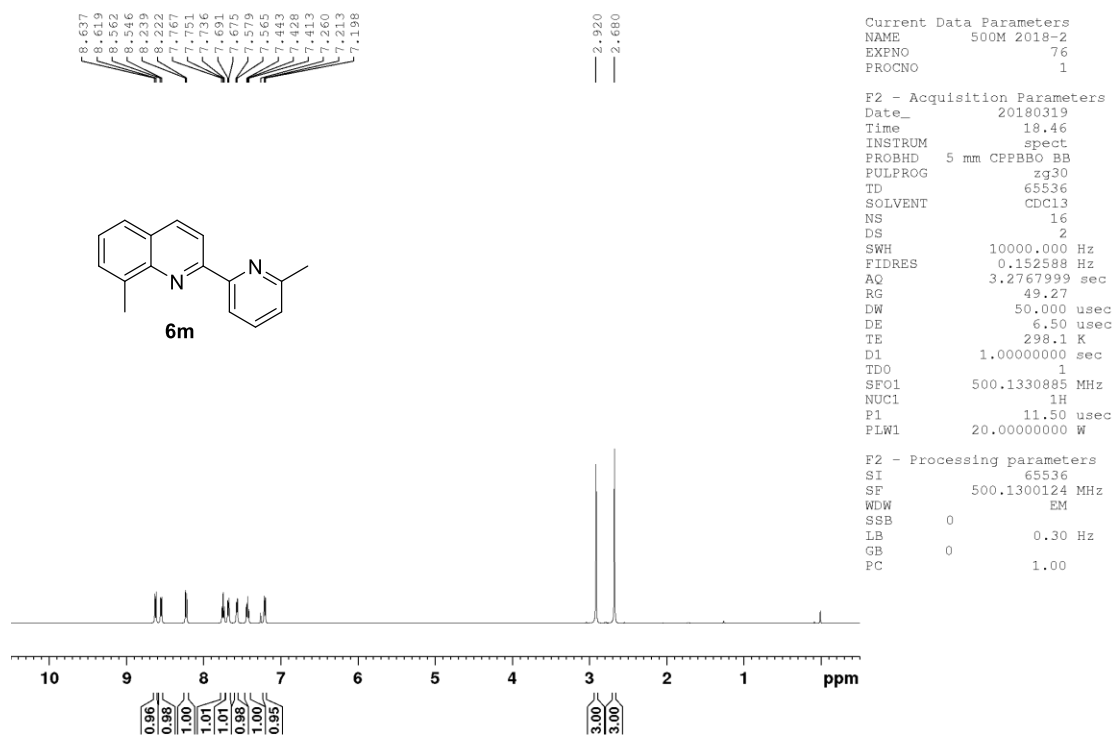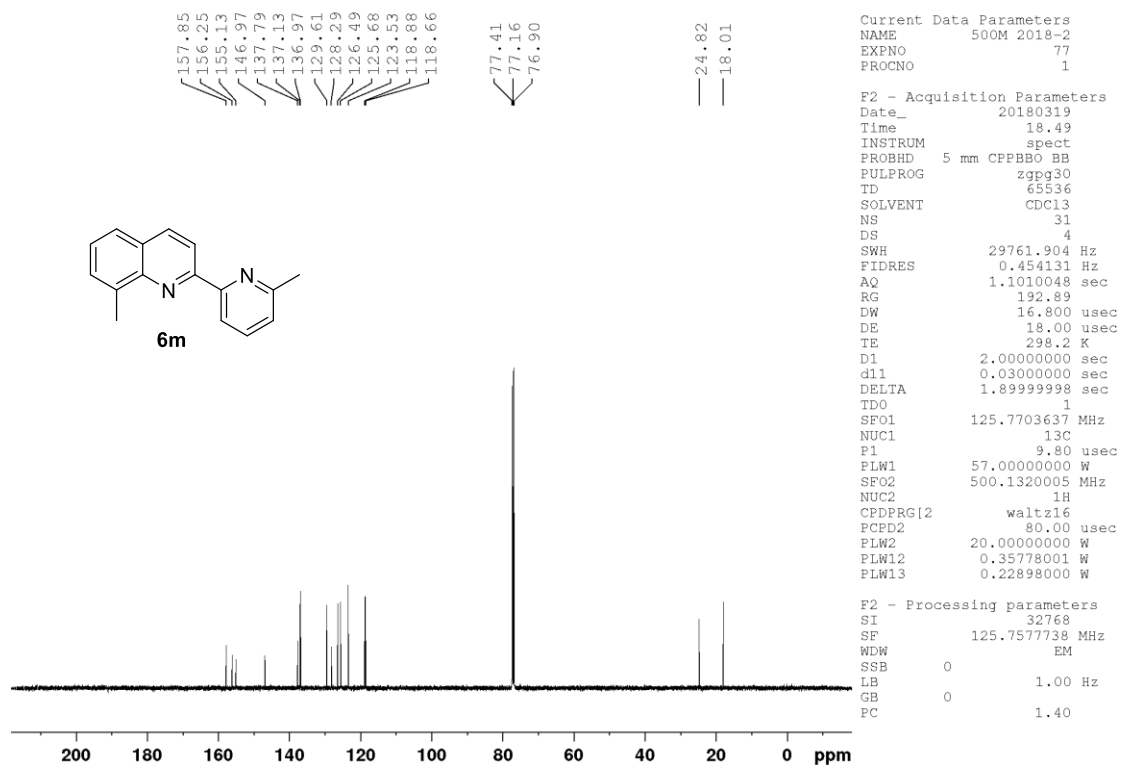

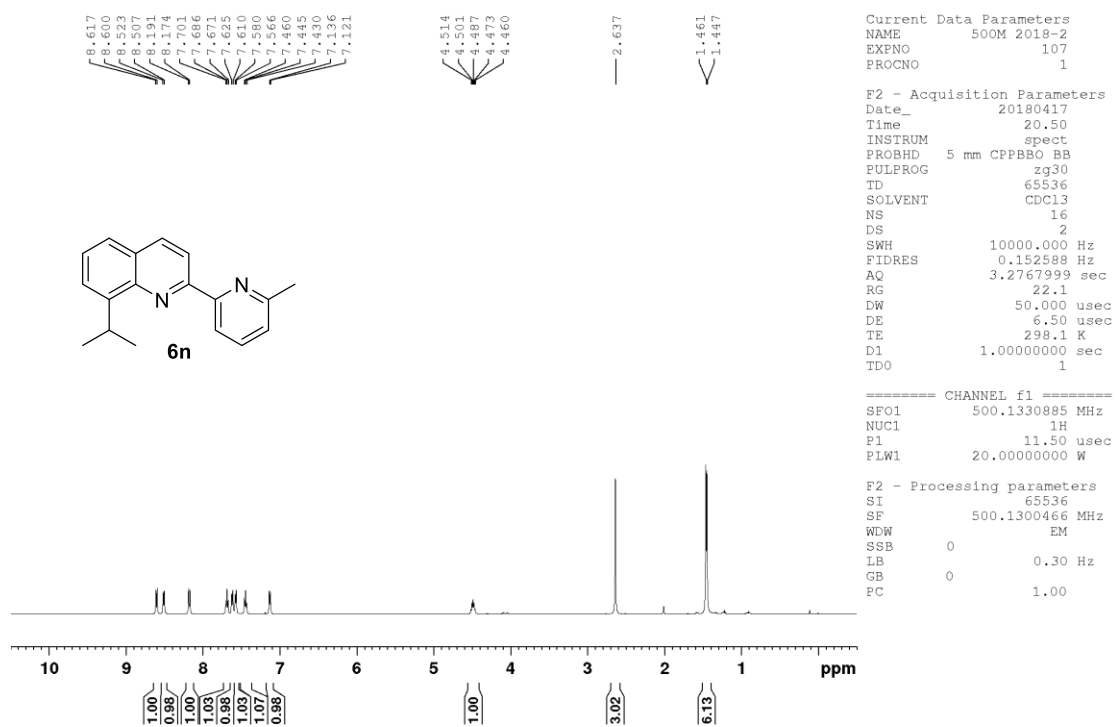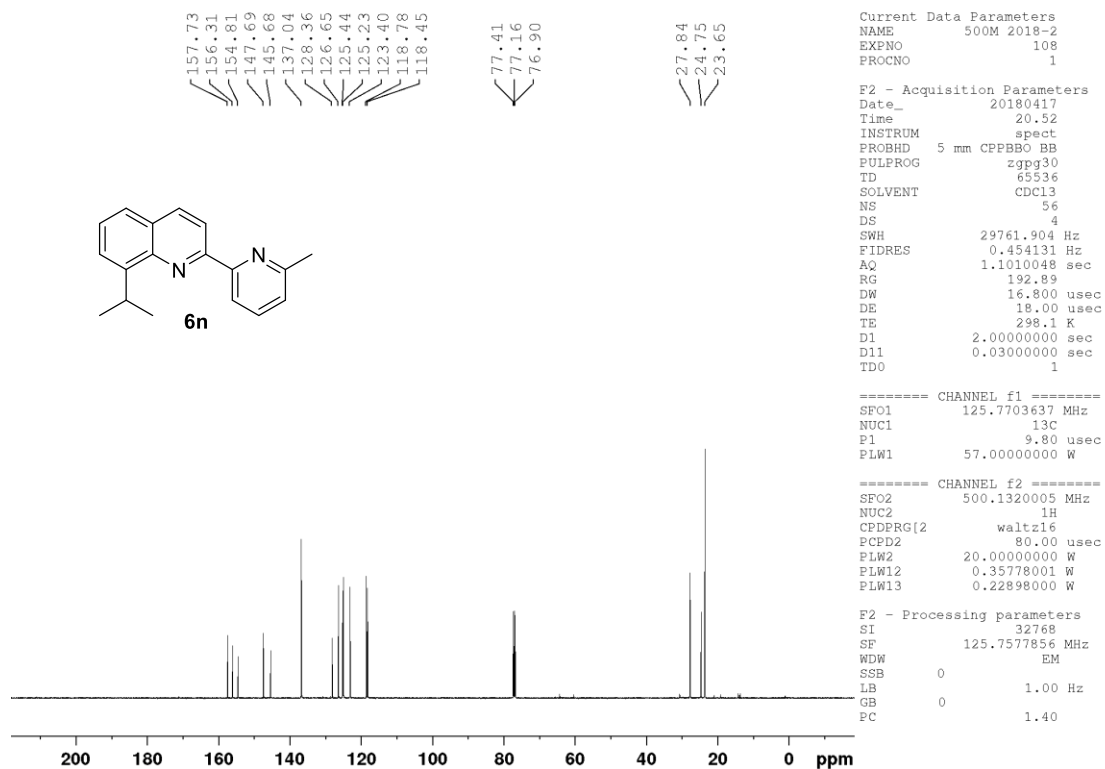

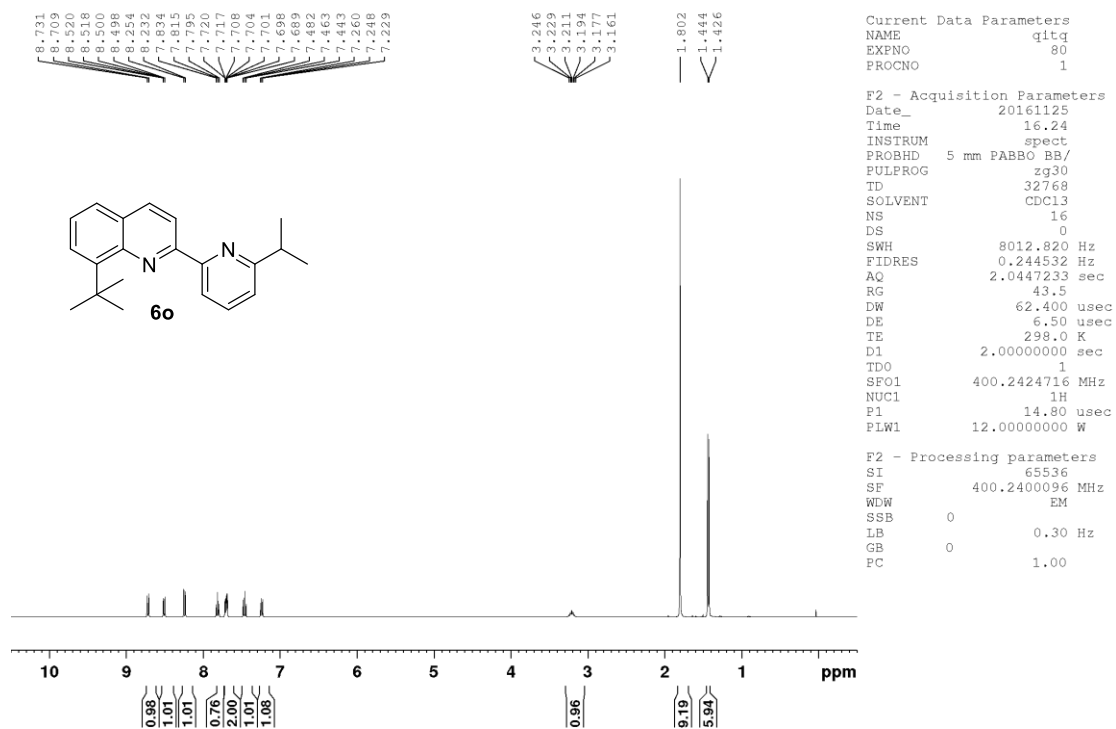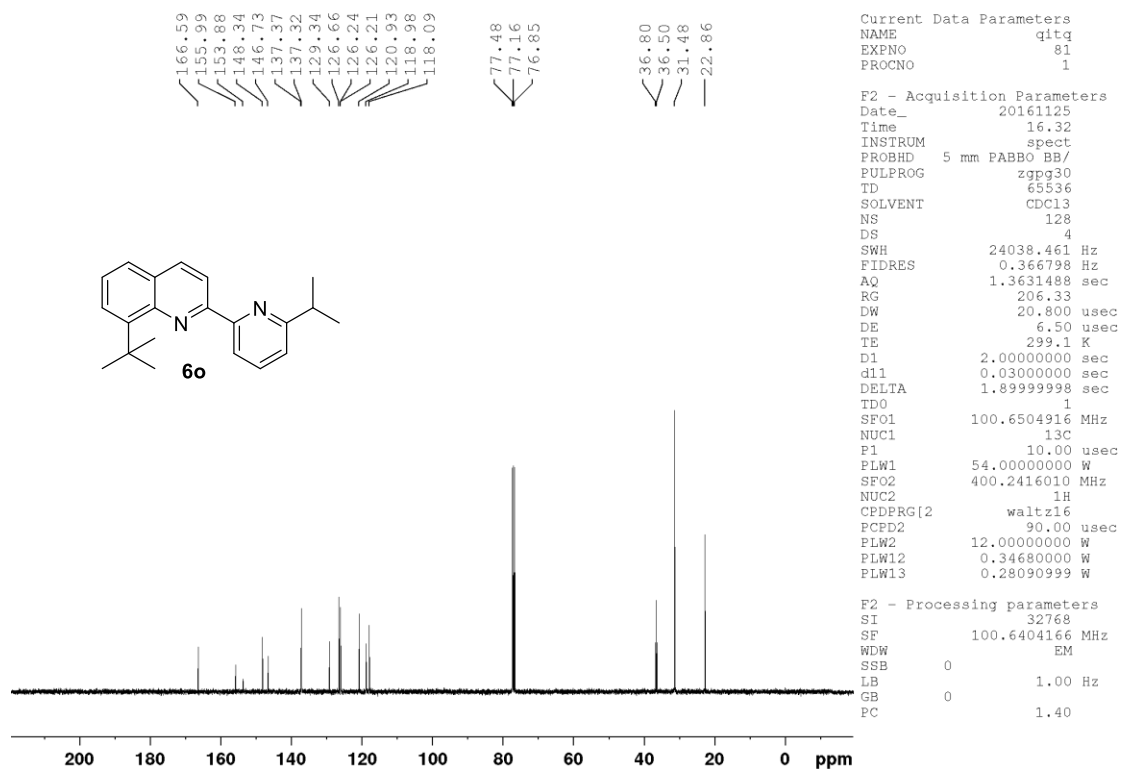

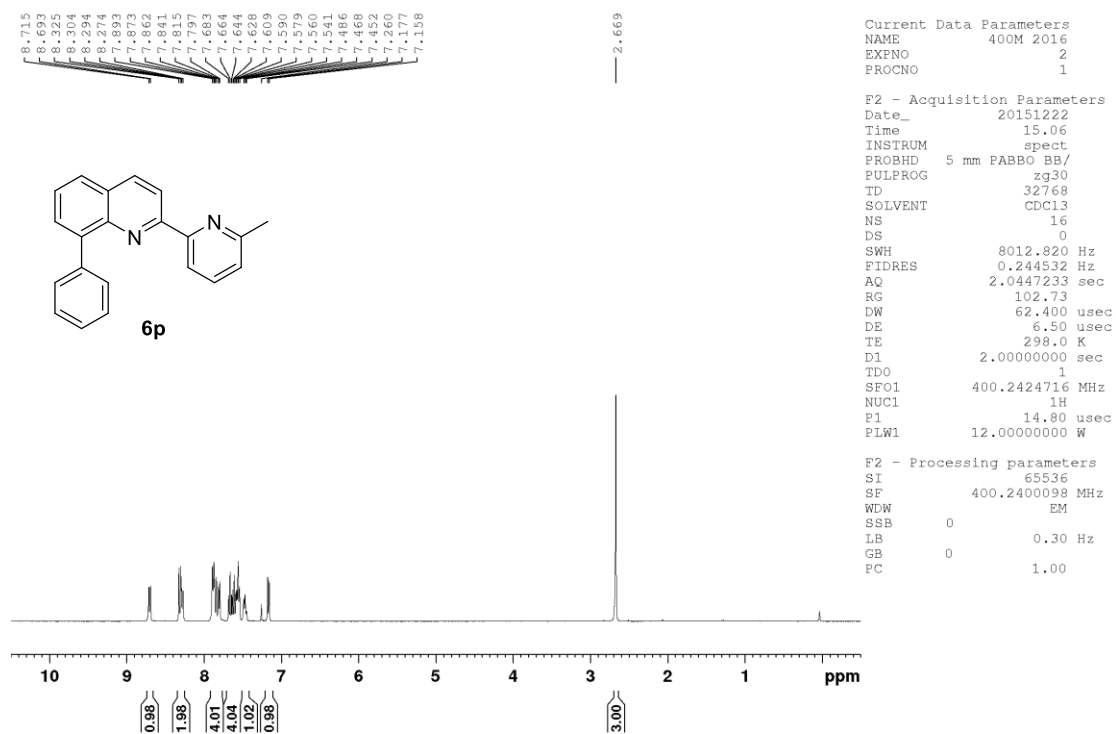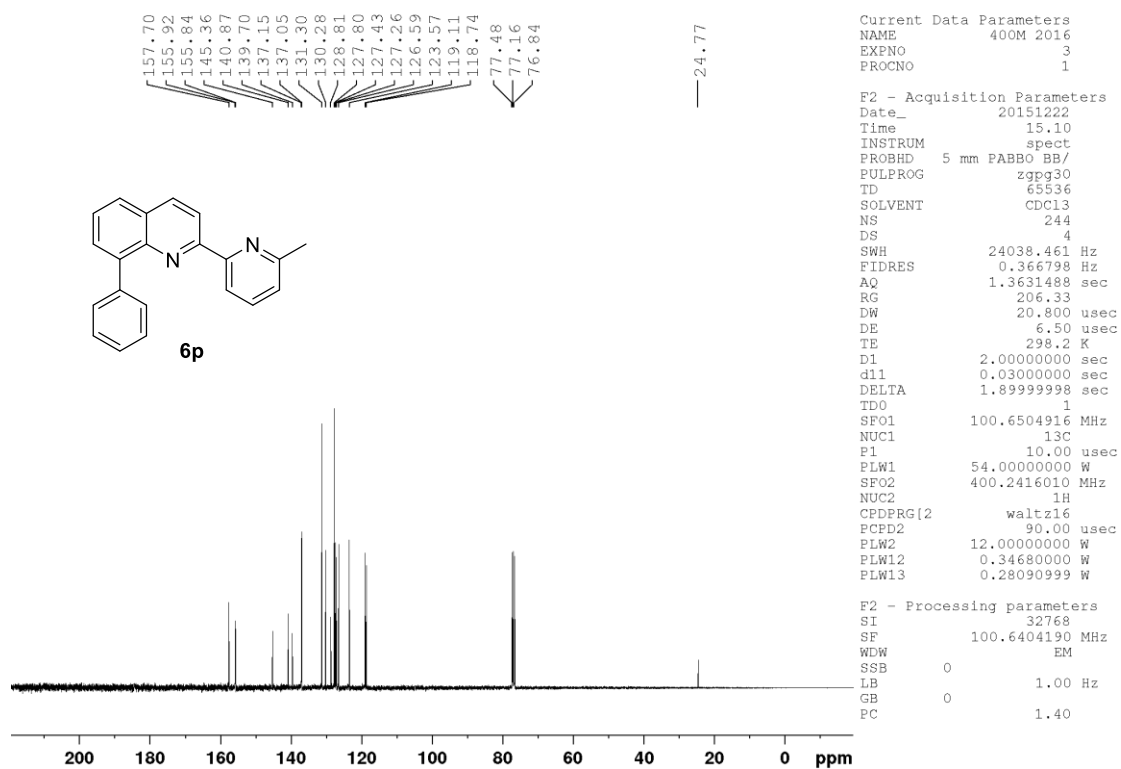

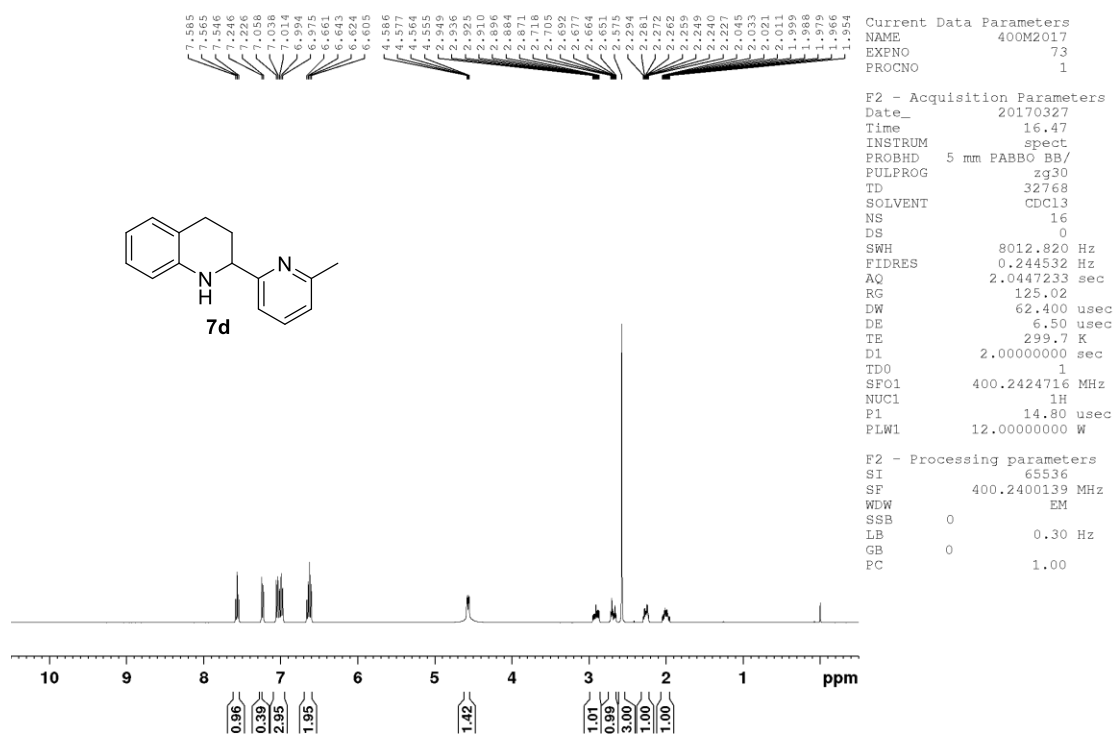

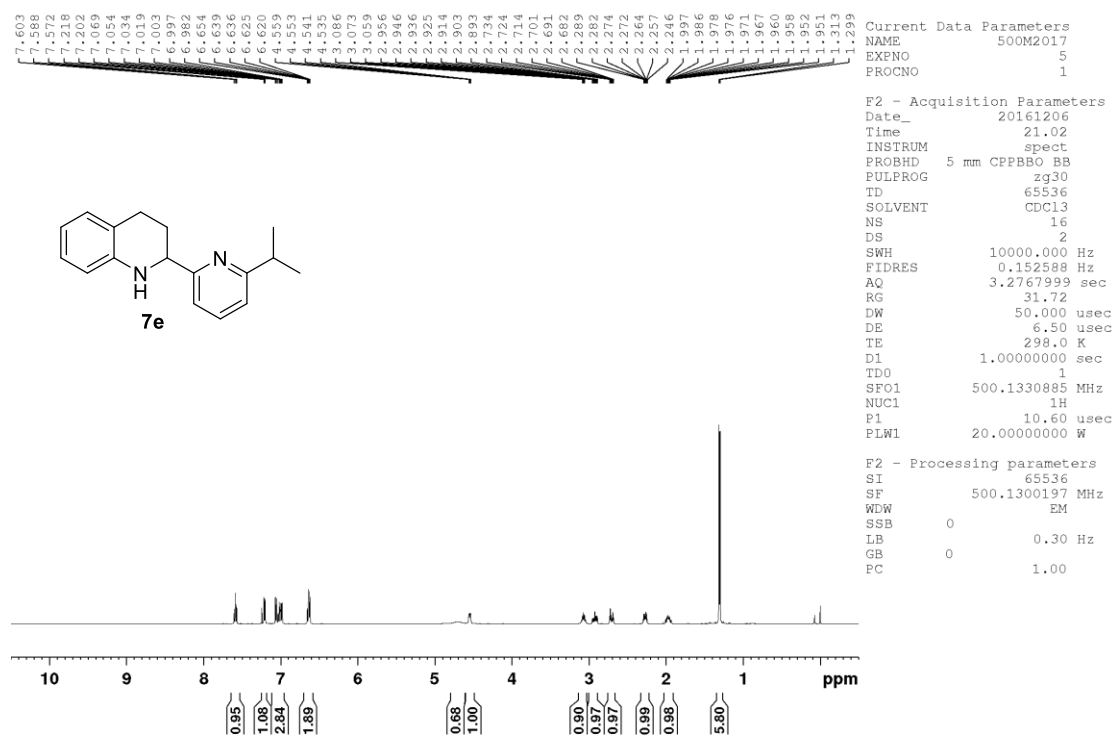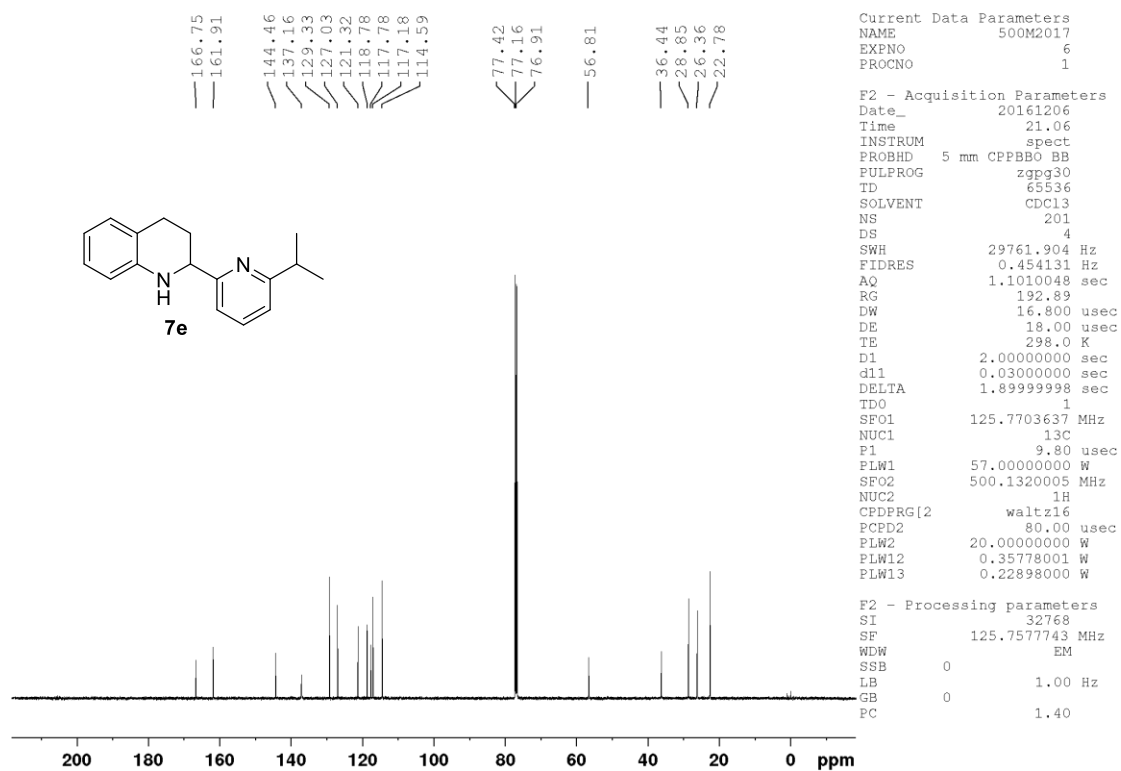



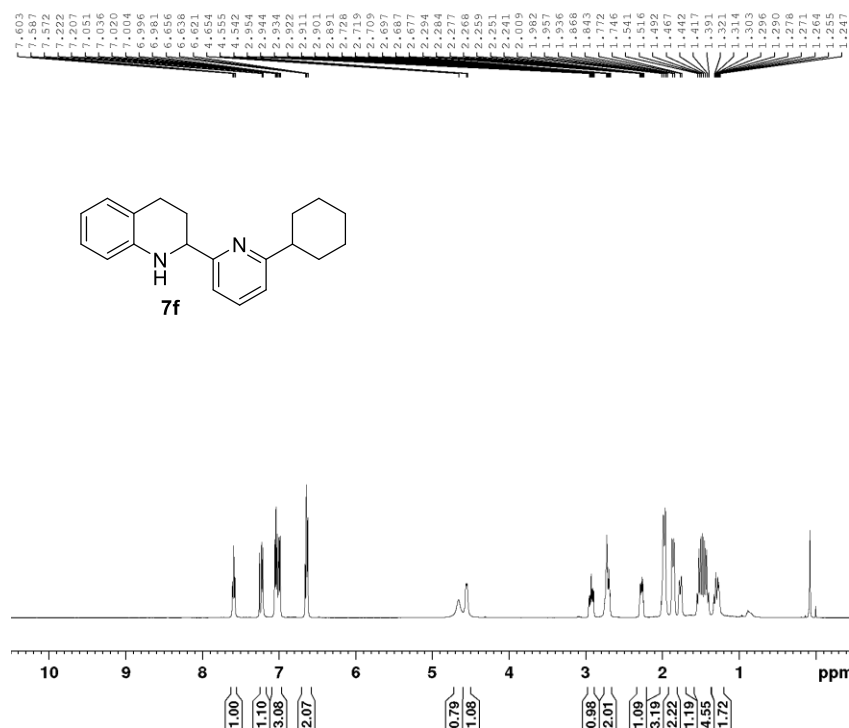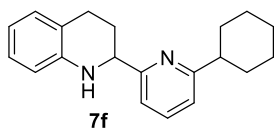

Current Data Parameters  
NAME 500M 2018-2  
EXPNO 64  
PROCNO 1

F2 - Acquisition Parameters  
Date\_ 20180313  
Time 9.15  
INSTRUM spect  
PROBHD 5 mm CPPBBO BB  
PULPROG zg30  
TD 65536  
SOLVENT CDCl3  
NS 16  
DS 2  
SWH 10000.000 Hz  
FIDRES 0.152588 Hz  
AQ 3.2767999 sec  
RG 31.72  
DW 50.000 usec  
DE 6.50 usec  
TE 298.2 K  
D1 1.00000000 sec  
TD0 1  
SFO1 500.1330885 MHz  
NUC1 1H  
P1 11.50 usec  
PLW1 20.00000000 W

F2 - Processing parameters  
SI 65536  
SF 500.1300158 MHz  
WDW EM  
SSB 0  
LB 0.30 Hz  
GB 0  
PC 1.00

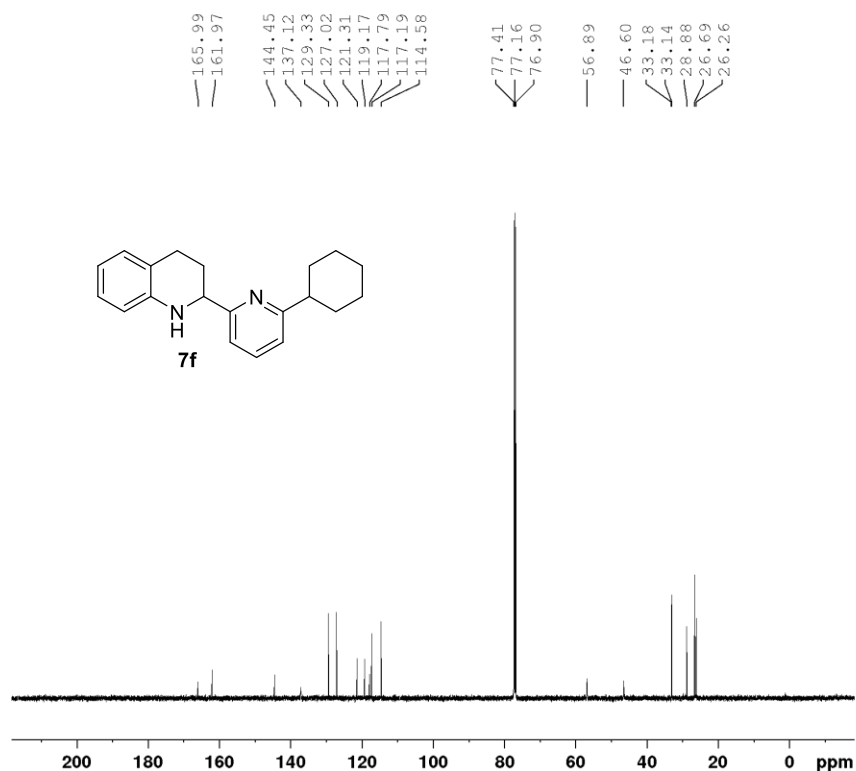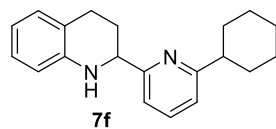

Current Data Parameters  
NAME 500M 2018-2  
EXPNO 65  
PROCNO 1

F2 - Acquisition Parameters  
Date\_ 20180313  
Time 9.18  
INSTRUM spect  
PROBHD 5 mm CPPBBO BB  
PULPROG zgpg30  
TD 65536  
SOLVENT CDCl3  
NS 45  
DS 4  
SWH 29761.904 Hz  
FIDRES 0.454131 Hz  
AQ 1.1010048 sec  
RG 192.89  
DW 16.800 usec  
DE 18.00 usec  
TE 298.1 K  
D1 2.00000000 sec  
d11 0.03000000 sec  
DELTA 1.89999998 sec  
TD0 1  
SFO1 125.7703637 MHz  
NUC1 13C  
P1 9.80 usec  
PLW1 57.00000000 W  
SFO2 500.1320005 MHz  
NUC2 1H  
CPDPRG[2] waltz16  
PCPD2 80.00 usec  
PLW2 20.00000000 W  
PLW12 0.35778001 W  
PLW13 0.22898000 W

F2 - Processing parameters  
SI 32768  
SF 125.7577738 MHz  
WDW EM  
SSB 0  
LB 1.00 Hz  
GB 0  
PC 1.40

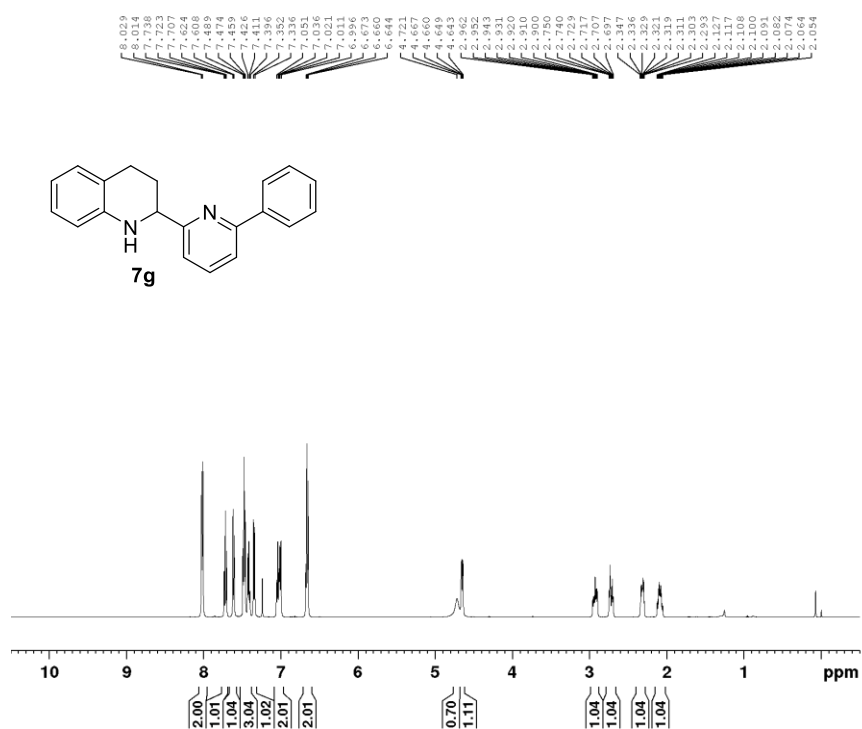

Current Data Parameters  
NAME 500M 2018-2  
EXPNO 50  
PROCNO 1

F2 - Acquisition Parameters  
Date\_ 20180307  
Time 21.50  
INSTRUM spect  
PROBHD 5 mm CFPBBO BB  
PULPROG zg30  
TD 65536  
SOLVENT CDCl3  
NS 16  
DS 2  
SWH 10000.000 Hz  
FIDRES 0.152588 Hz  
AQ 3.2767999 sec  
RG 31.72  
DW 50.000 usec  
DE 6.50 usec  
TE 298.2 K  
D1 1.00000000 sec  
TD0 1  
SF01 500.1330885 MHz  
NUC1 1H  
P1 11.50 usec  
PLW1 20.00000000 W

F2 - Processing parameters  
SI 65536  
SF 500.1300235 MHz  
WDW EM  
SSB 0  
LB 0.30 Hz  
GB 0  
PC 1.00

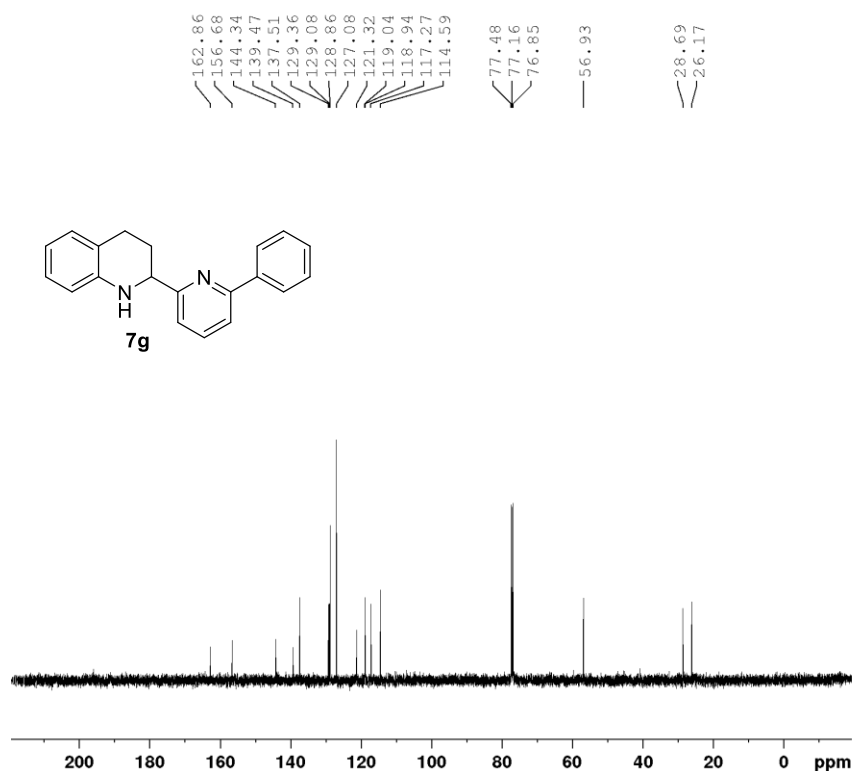

Current Data Parameters  
NAME 400M 2018  
EXPNO 325  
PROCNO 1

F2 - Acquisition Parameters  
Date\_ 20180305  
Time 15.05  
INSTRUM spect  
PROBHD 5 mm PABBO BB/  
PULPROG zgpg30  
TD 65536  
SOLVENT CDCl3  
NS 9  
DS 4  
SWH 24038.461 Hz  
FIDRES 0.366798 Hz  
AQ 1.3631488 sec  
RG 206.33  
DW 20.800 usec  
DE 6.50 usec  
TE 298.1 K  
D1 2.00000000 sec  
d11 0.03000000 sec  
DELTA 1.89999999 sec  
TD0 1  
SF01 100.6504916 MHz  
NUC1 13C  
P1 10.00 usec  
PLW1 54.00000000 W  
SF02 400.2416010 MHz  
NUC2 1H  
CPDPRG2 waltz16  
PCPD2 90.00 usec  
PLW2 12.00000000 W  
PLW12 0.34680000 W  
PLW13 0.28090999 W

F2 - Processing parameters  
SI 32768  
SF 100.6404202 MHz  
WDW EM  
SSB 0  
LB 1.00 Hz  
GB 0  
PC 1.40

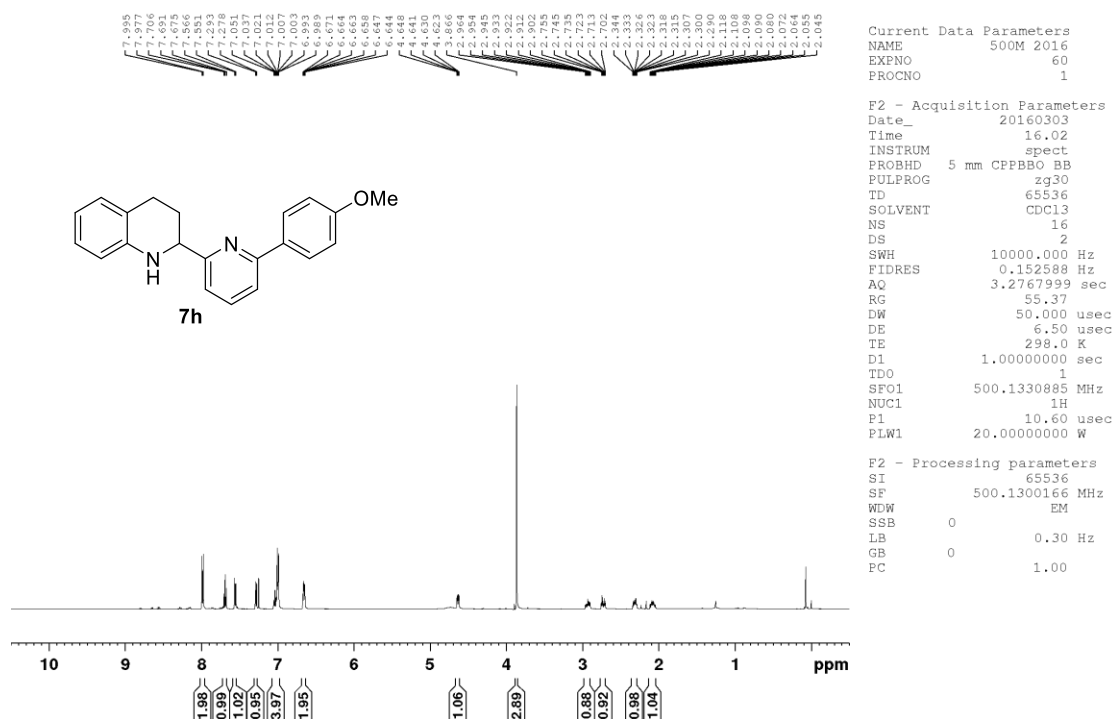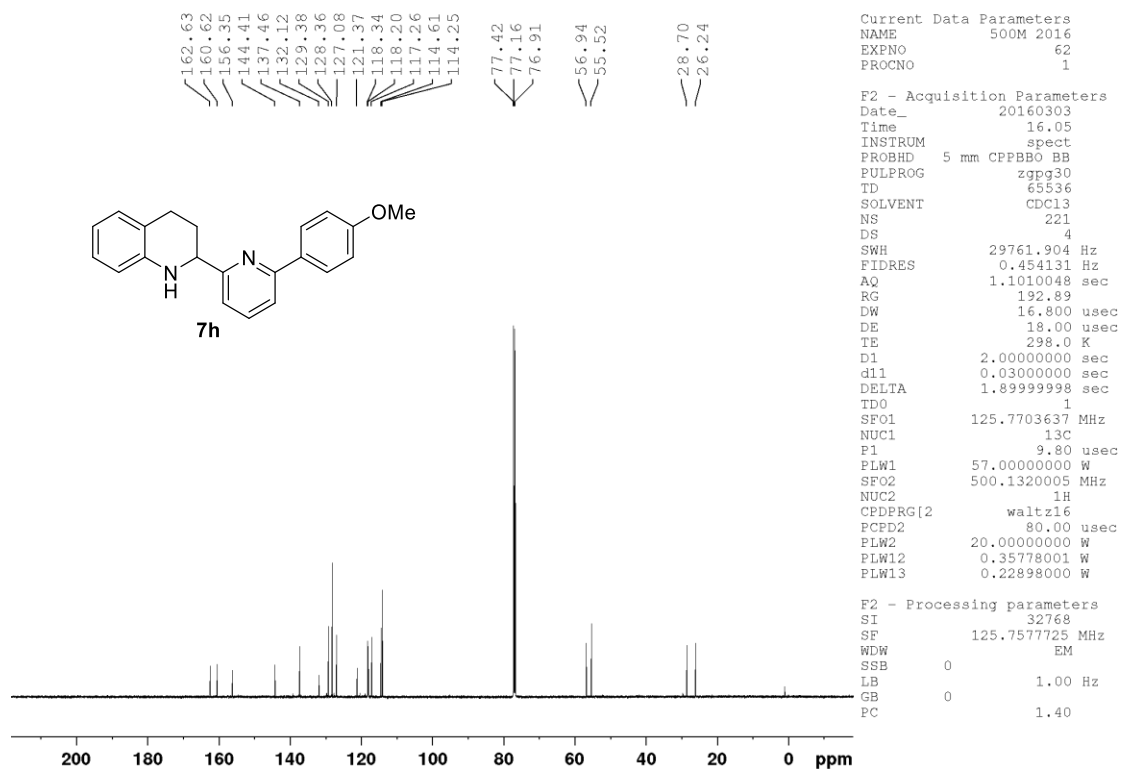

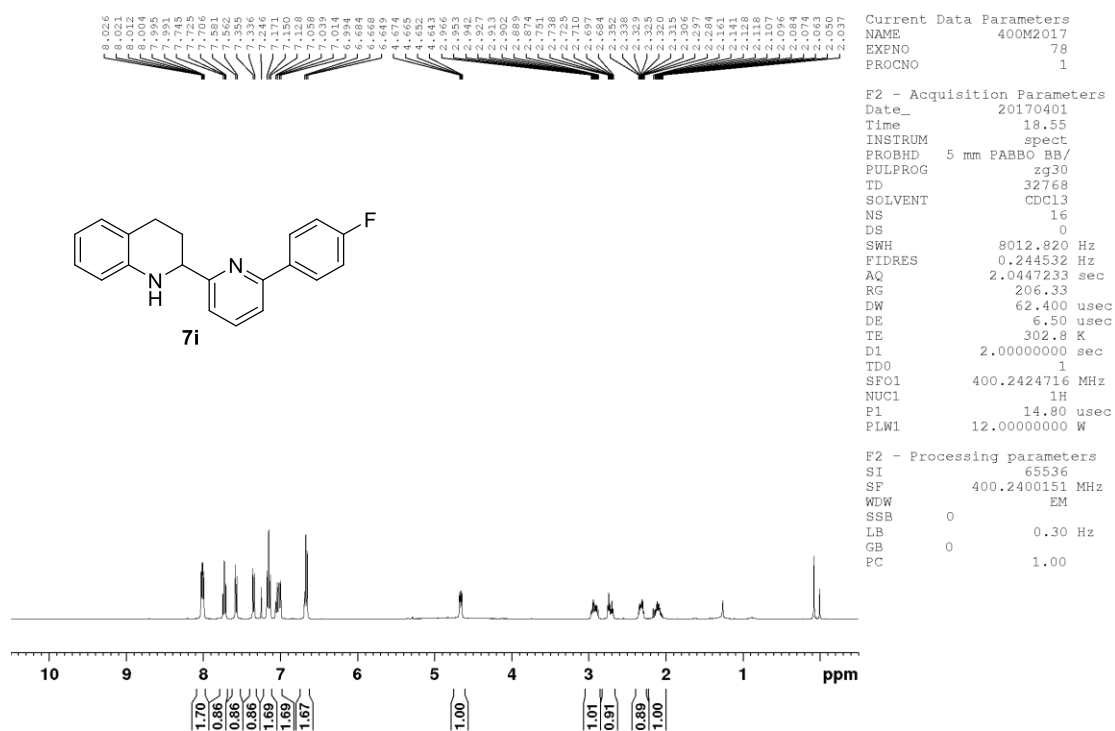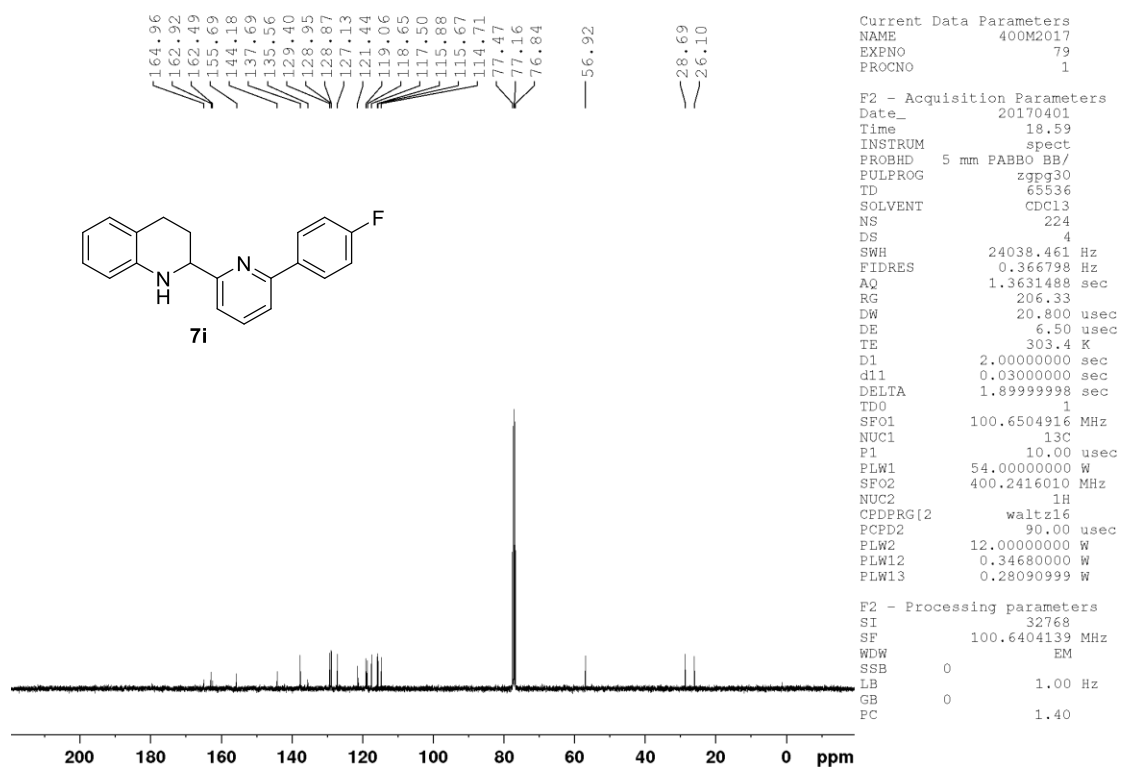

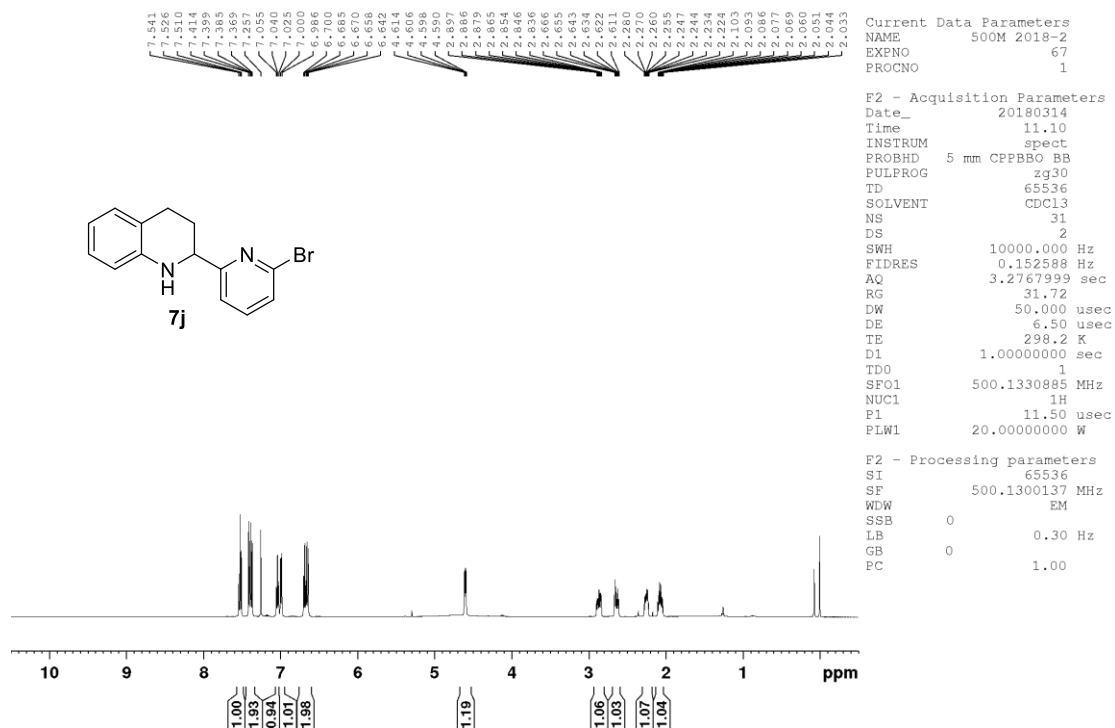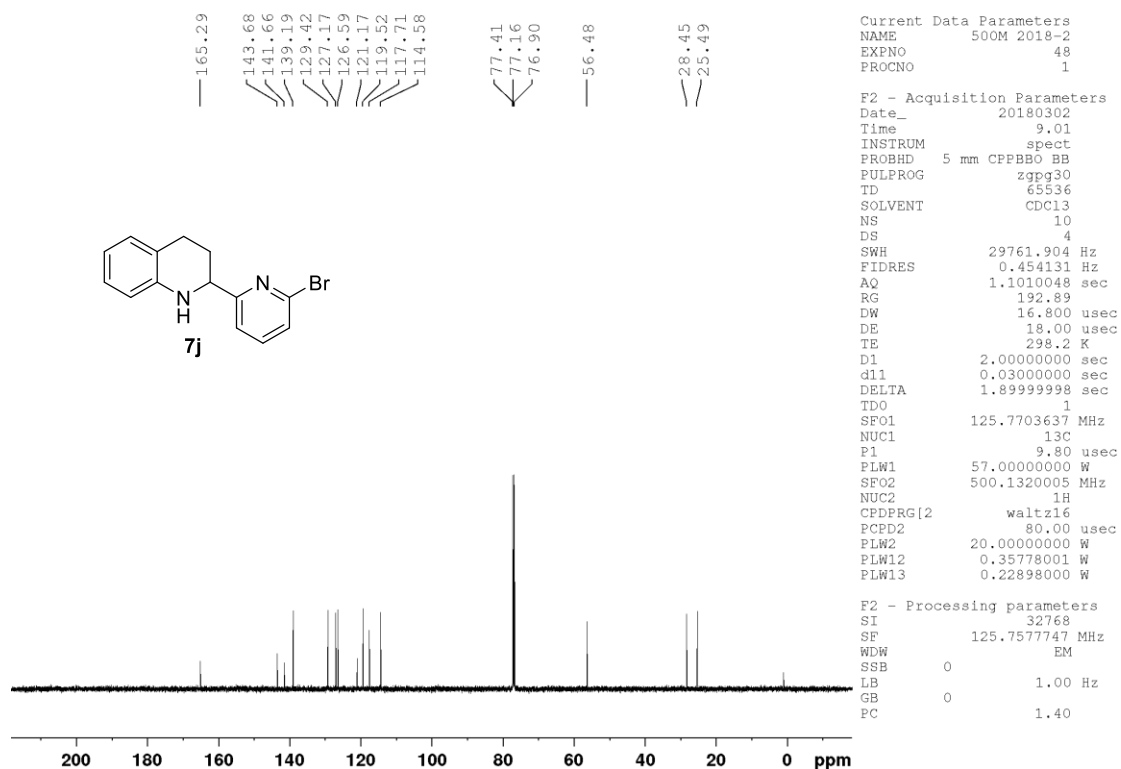

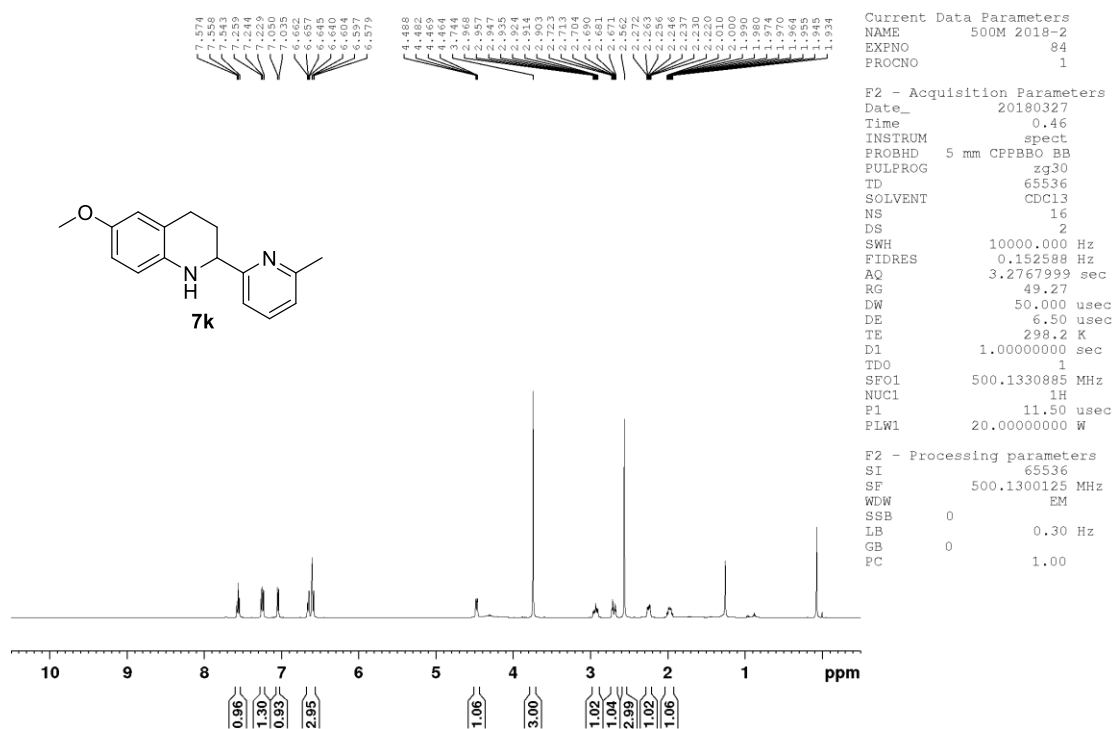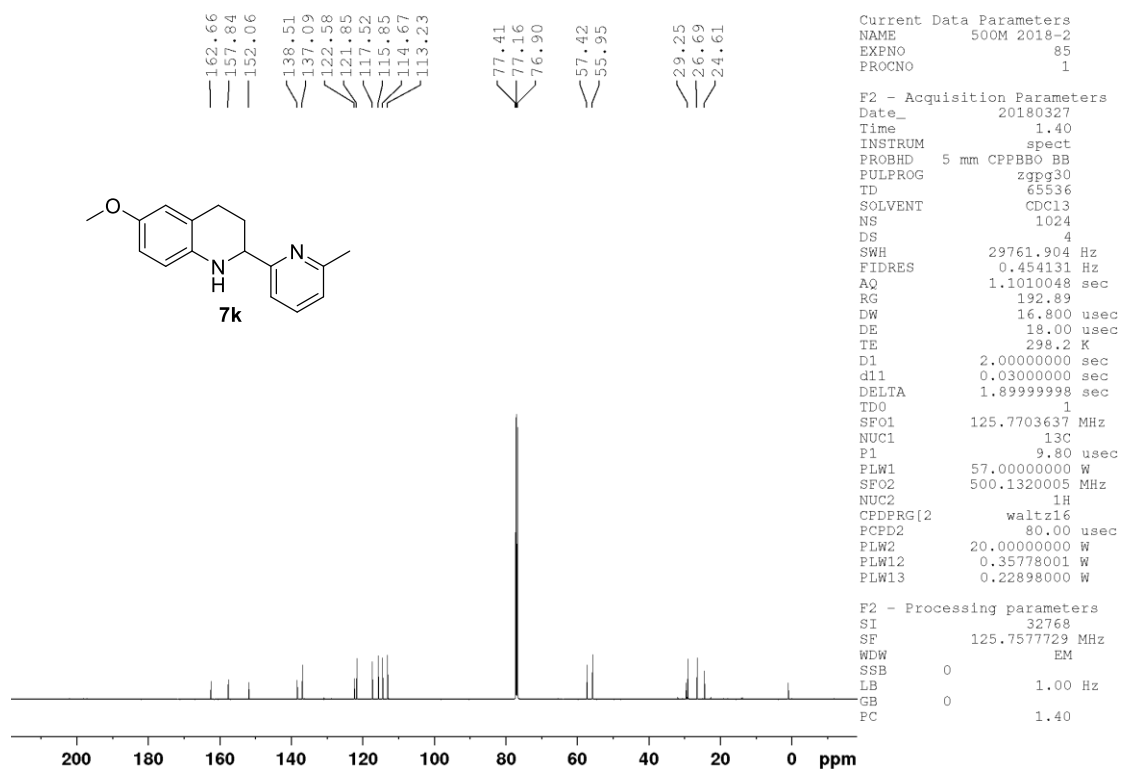

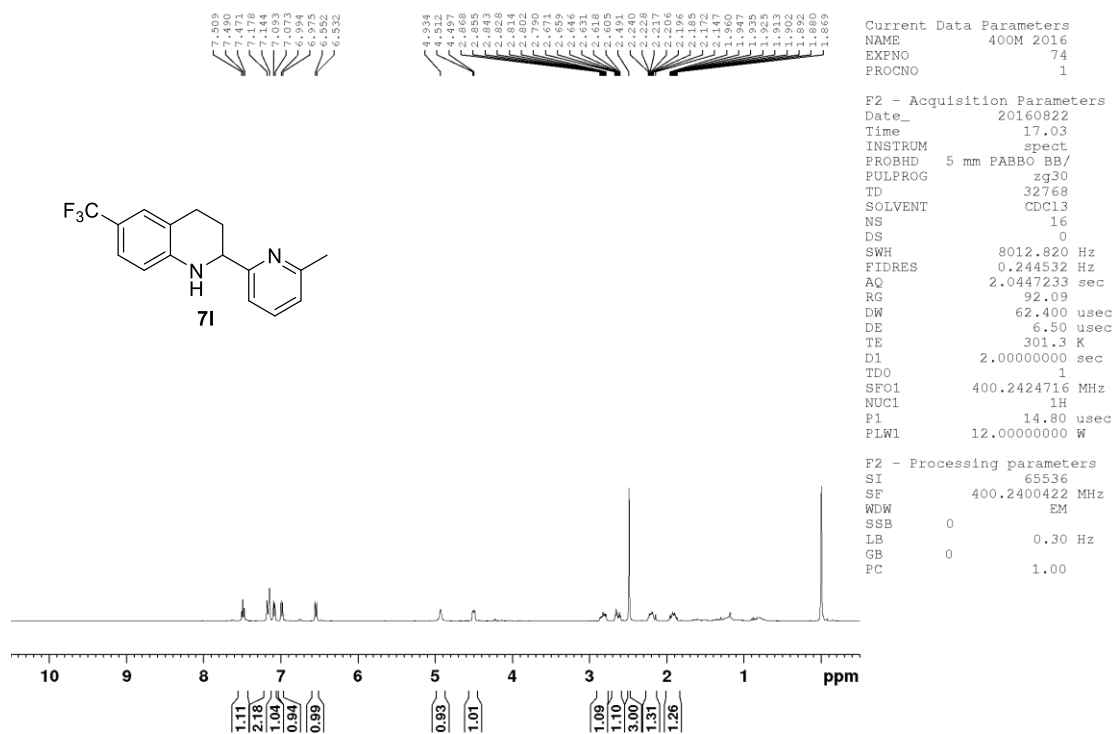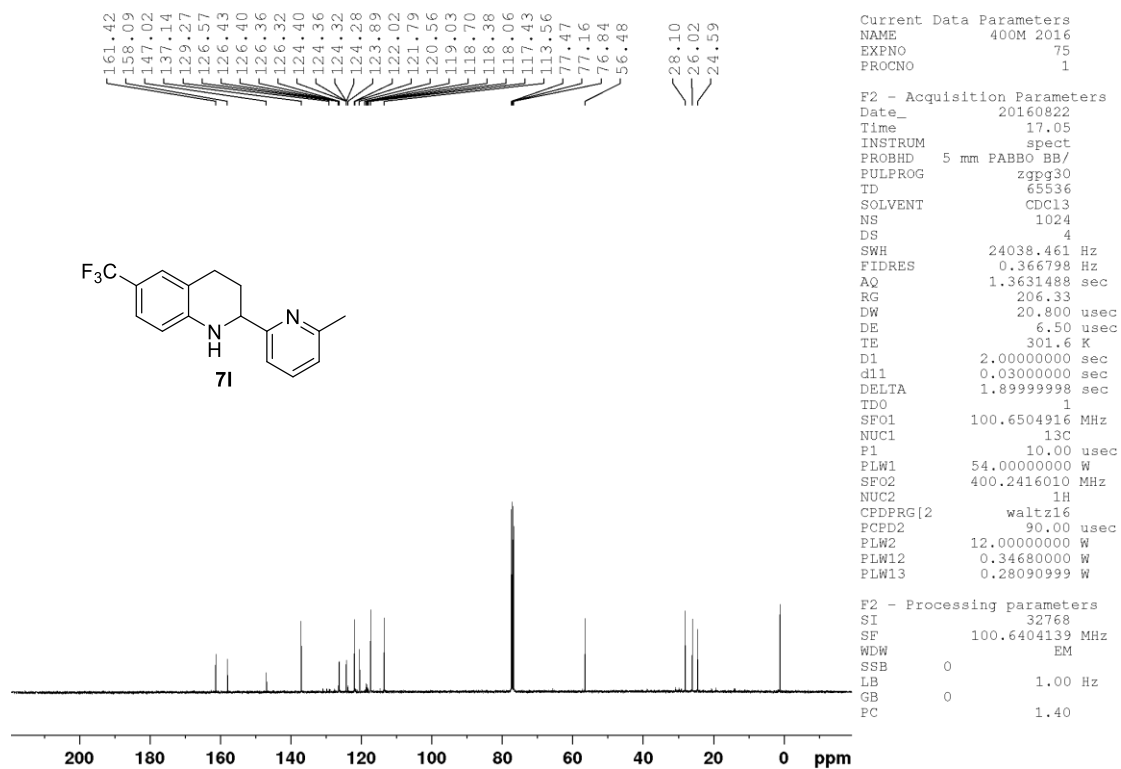

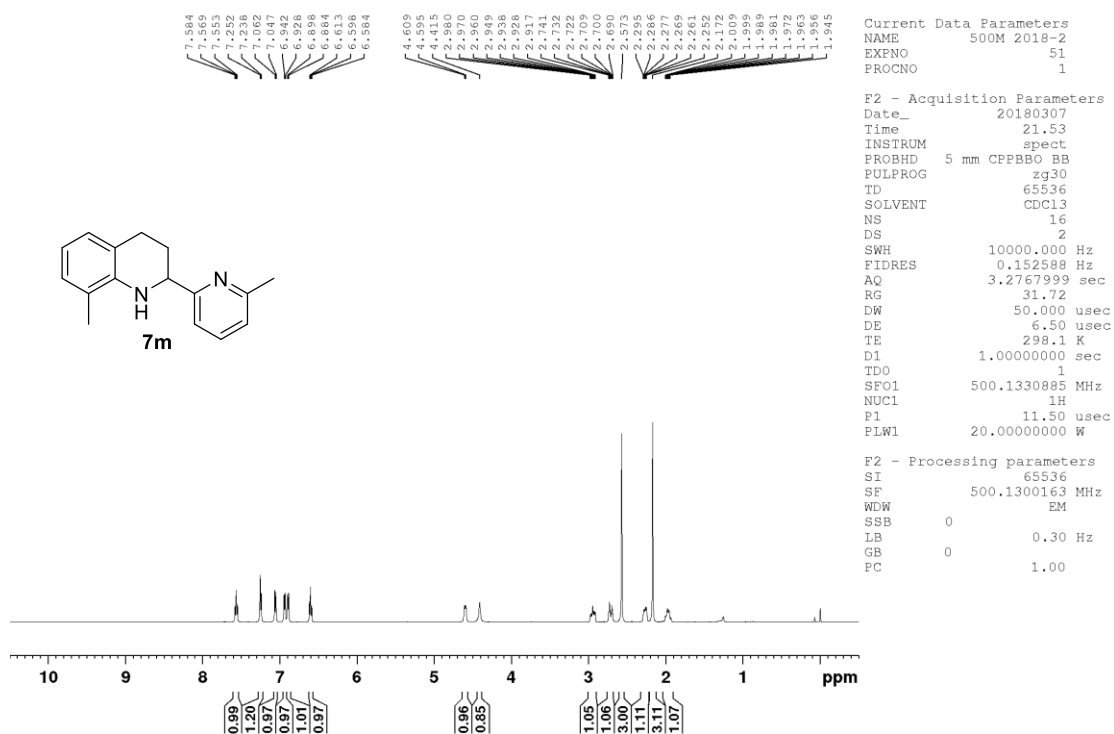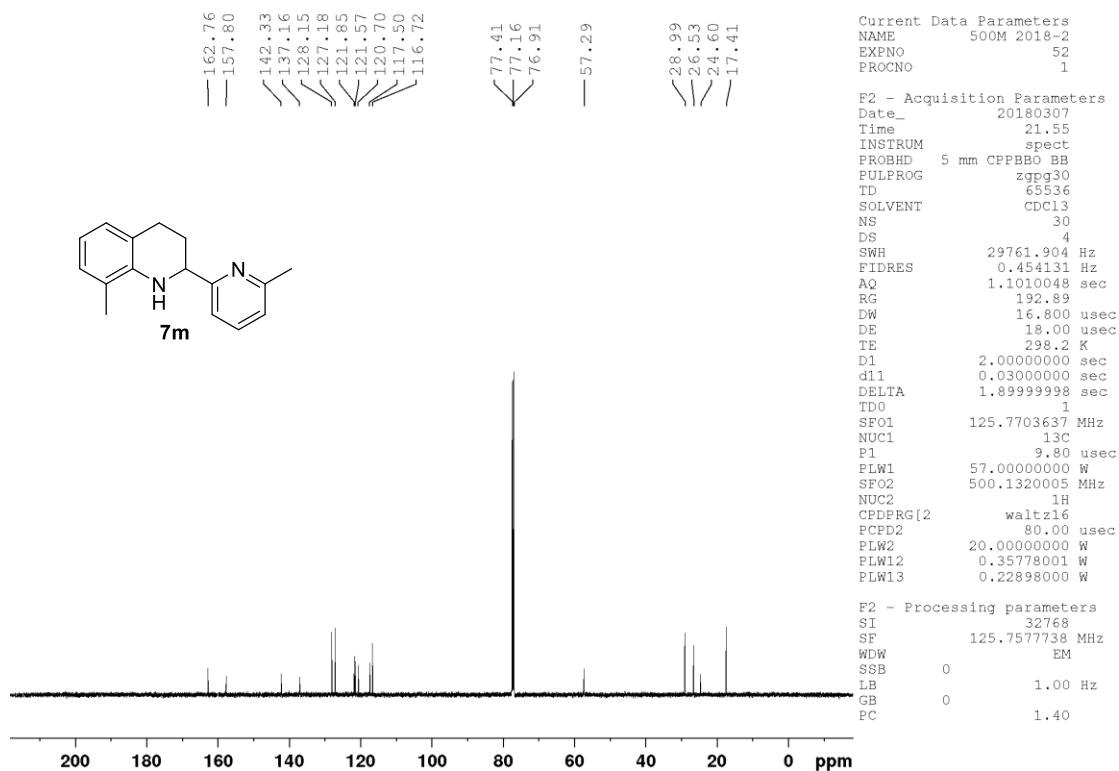



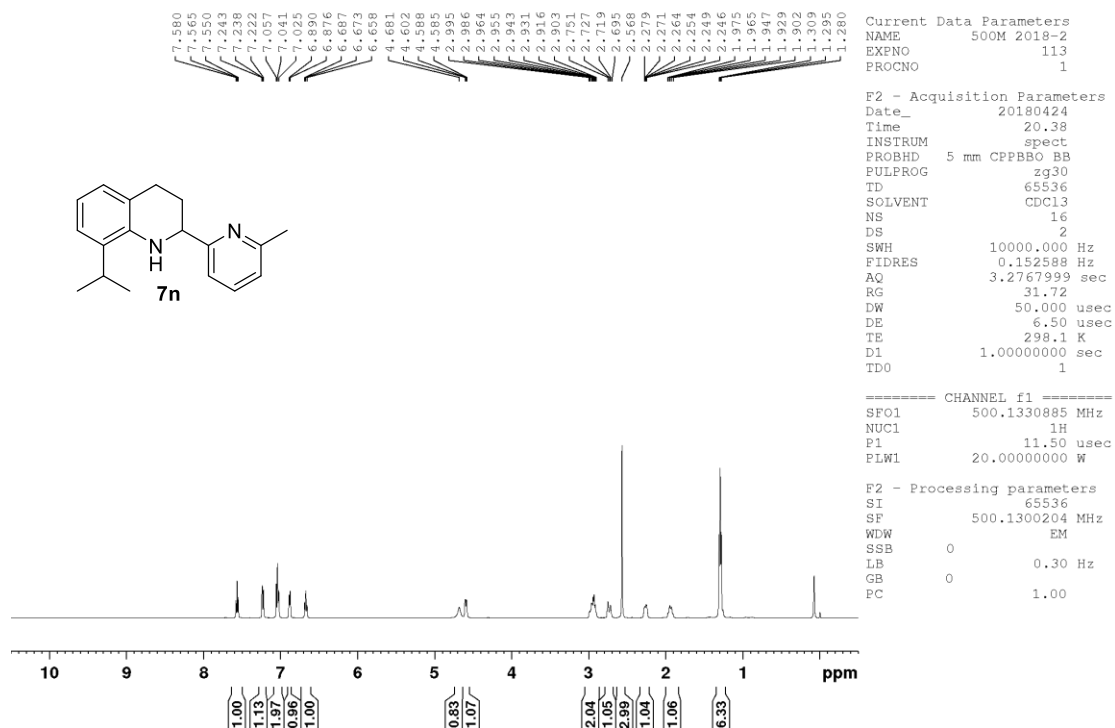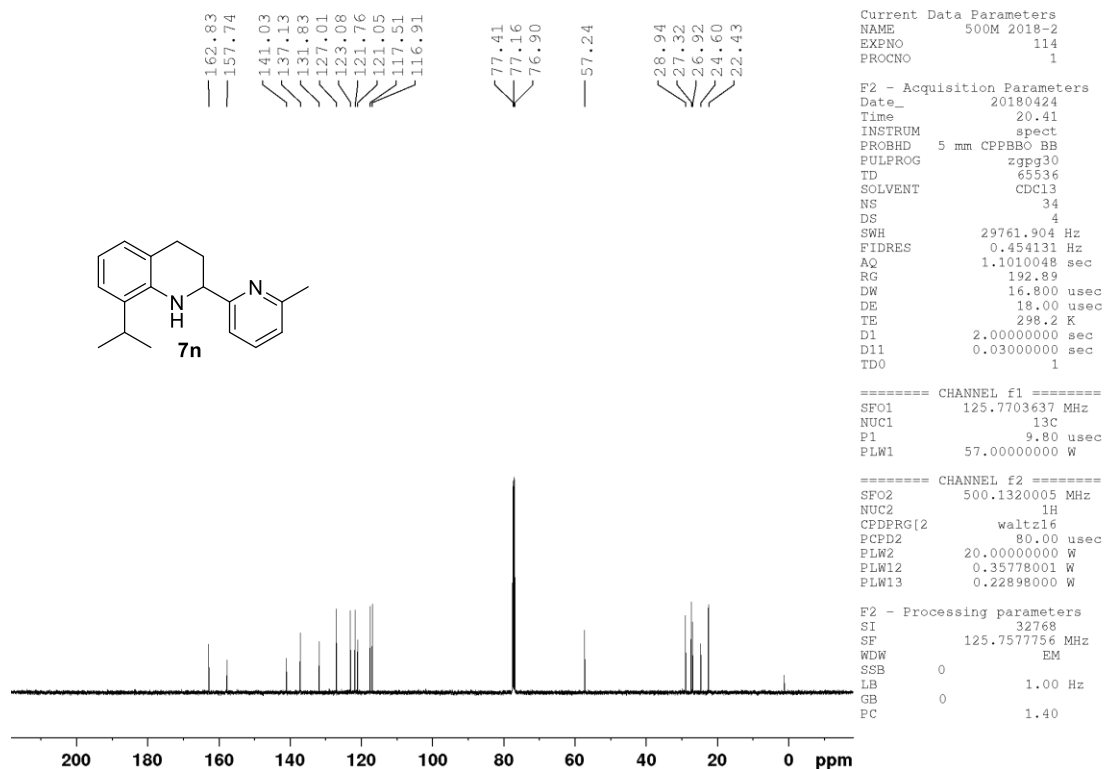

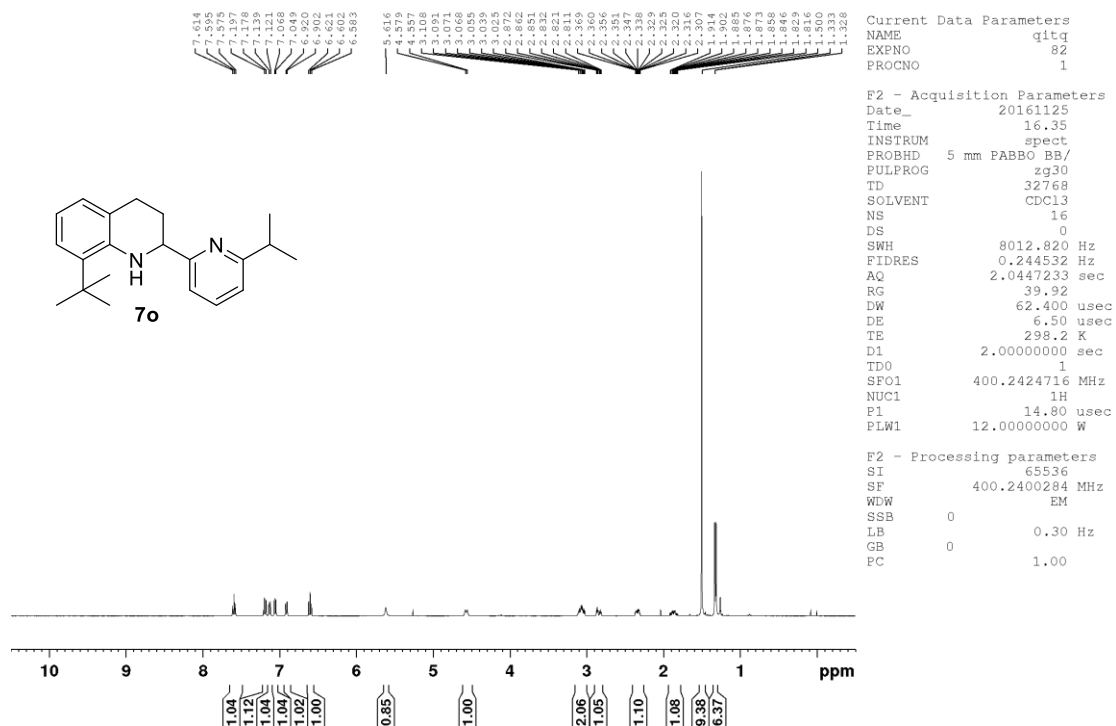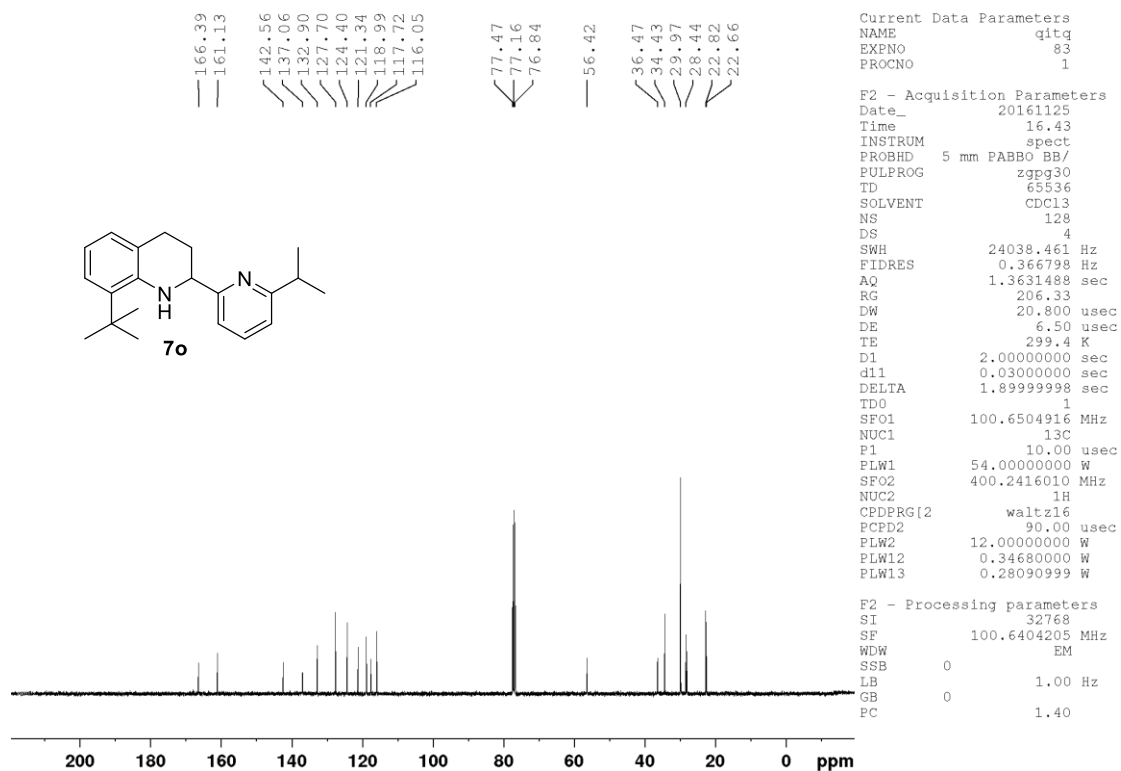

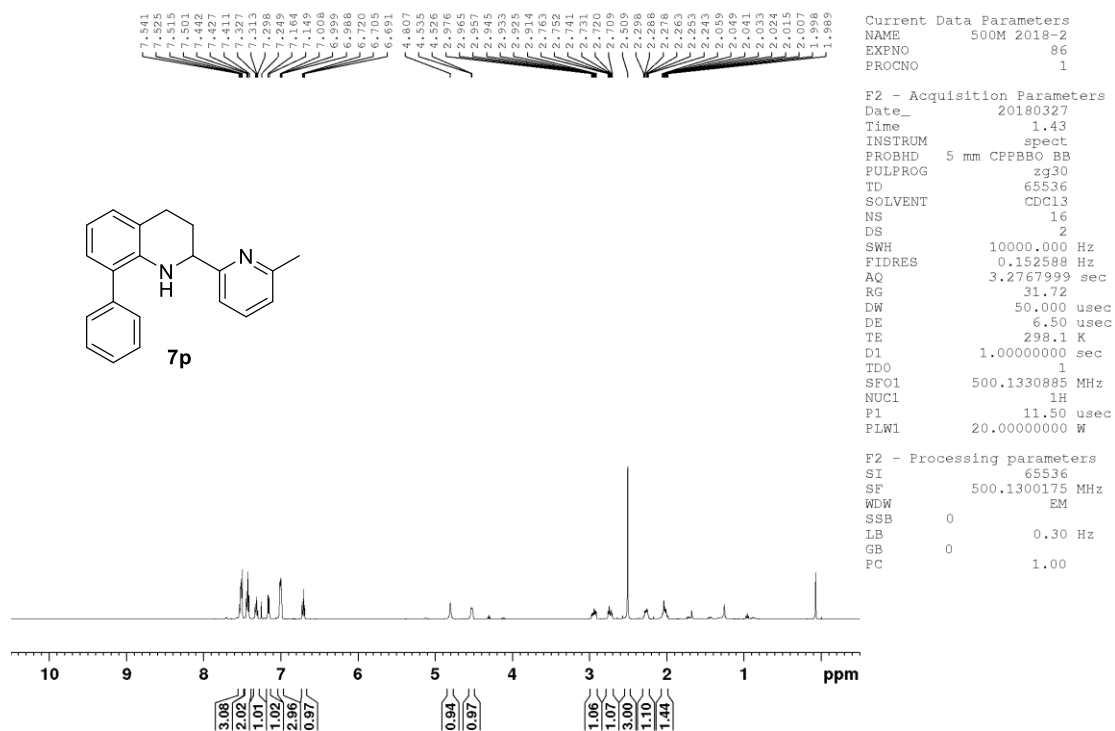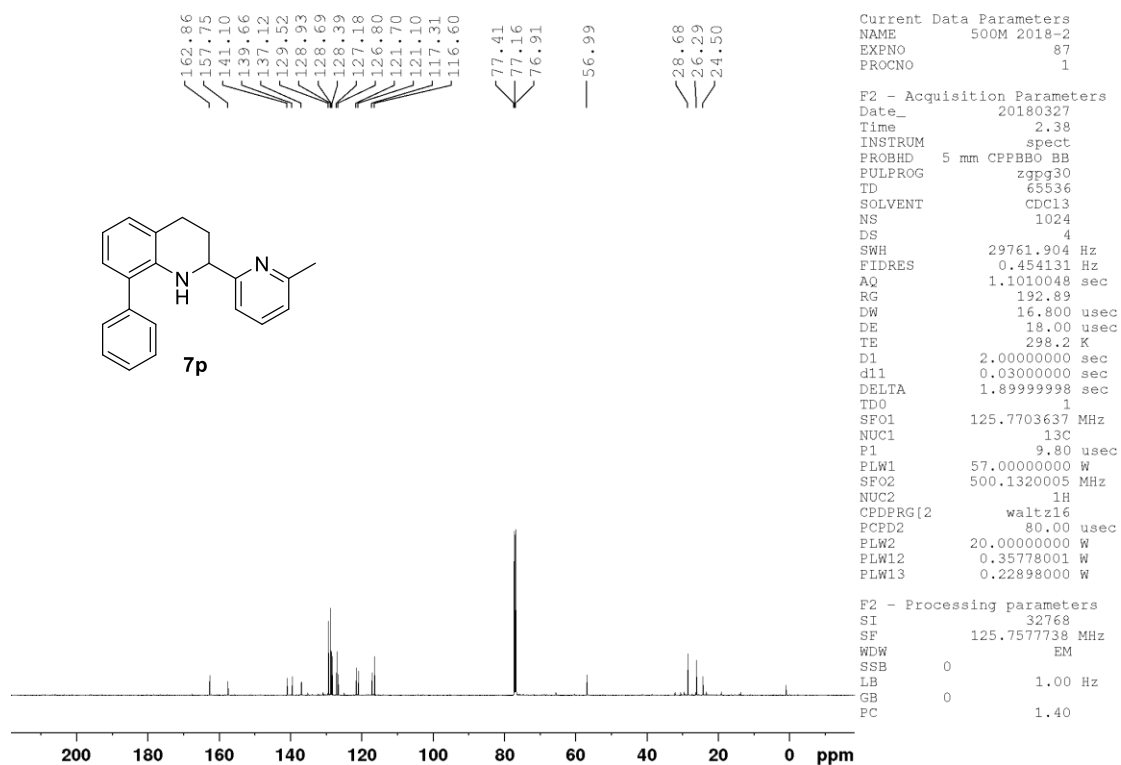



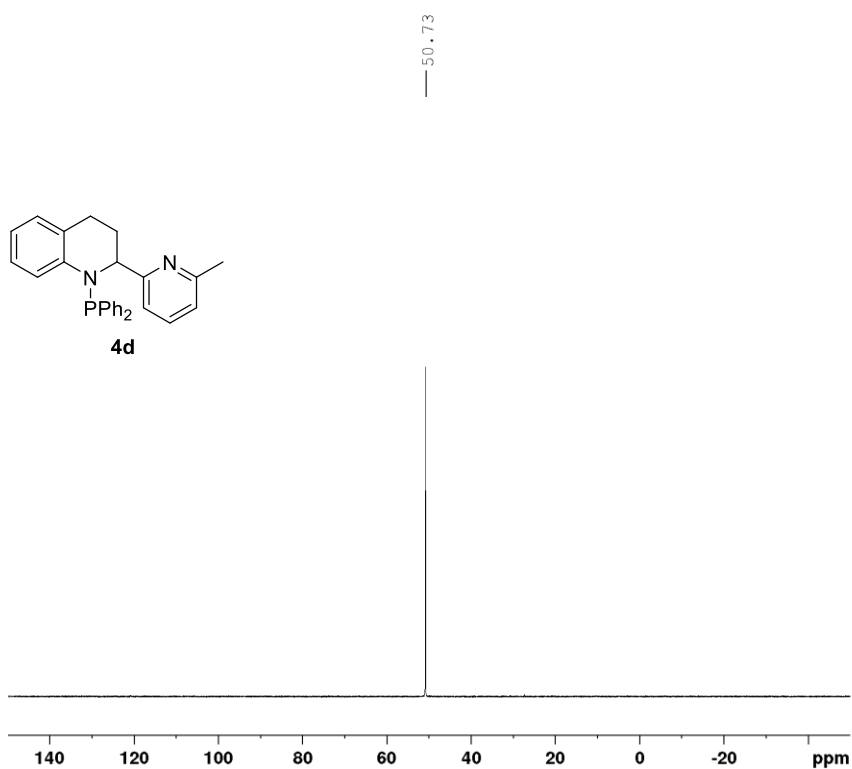

```

Current Data Parameters
NAME          500M P31
EXPNO         7
PROCNO        1

F2 - Acquisition Parameters
Date_         20161213
Time          16.34
INSTRUM       spect
PROBHD        5 mm CPPBBO BB
PULPROG       zgpgg
TD            65536
SOLVENT       CDCl3
NS            16
DS            4
SWH           100000.000 Hz
FIDRES        1.525879 Hz
AQ            0.3276800 sec
RG            192.89
DW            5.000 usec
DE            18.00 usec
TE            298.0 K
D1            2.00000000 sec
d11           0.03000000 sec
DELTA         1.89999998 sec
TD0           1
SF01          202.4664578 MHz
NUC1          31P
P1            11.50 usec
PLW1          52.96599960 W
SF02          500.1320005 MHz
NUC2          1H
CPDPRG[2]     waltz16
PCPD2         80.00 usec
PLW2          20.00000000 W
PLW12         0.35778001 W
PLW13         0.22898000 W

F2 - Processing parameters
SI            32768
SF            202.4563350 MHz
WDW           EM
SSB           0
LB            1.00 Hz
GB            0
PC            1.40

```

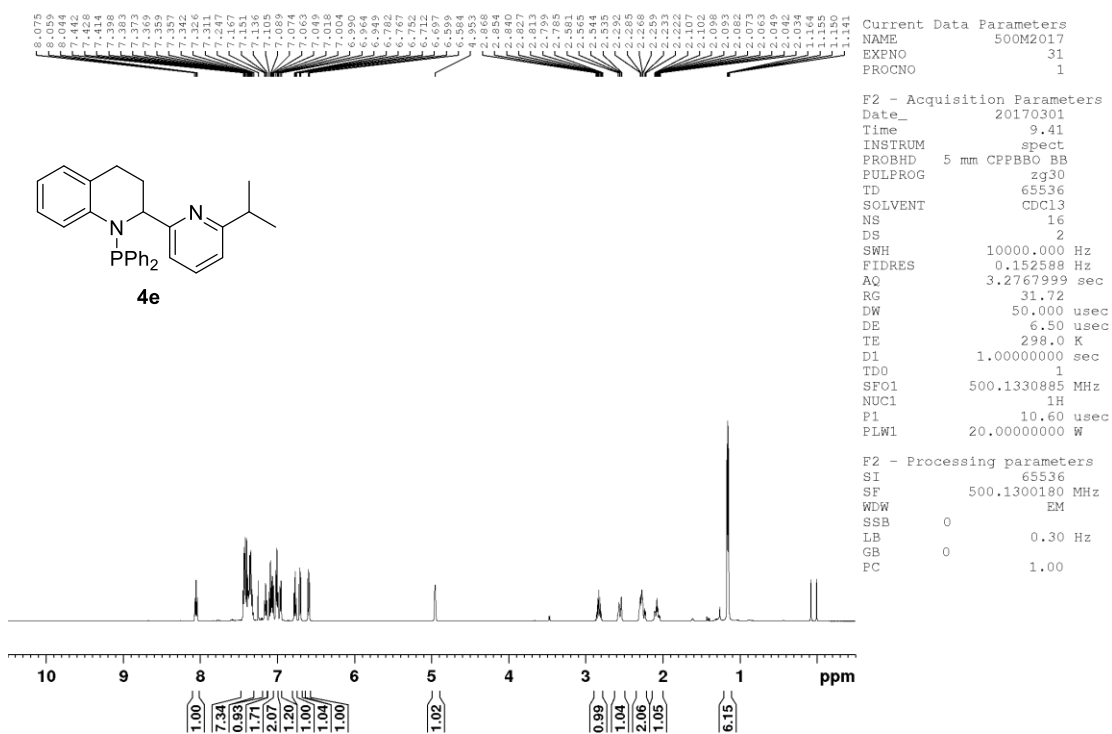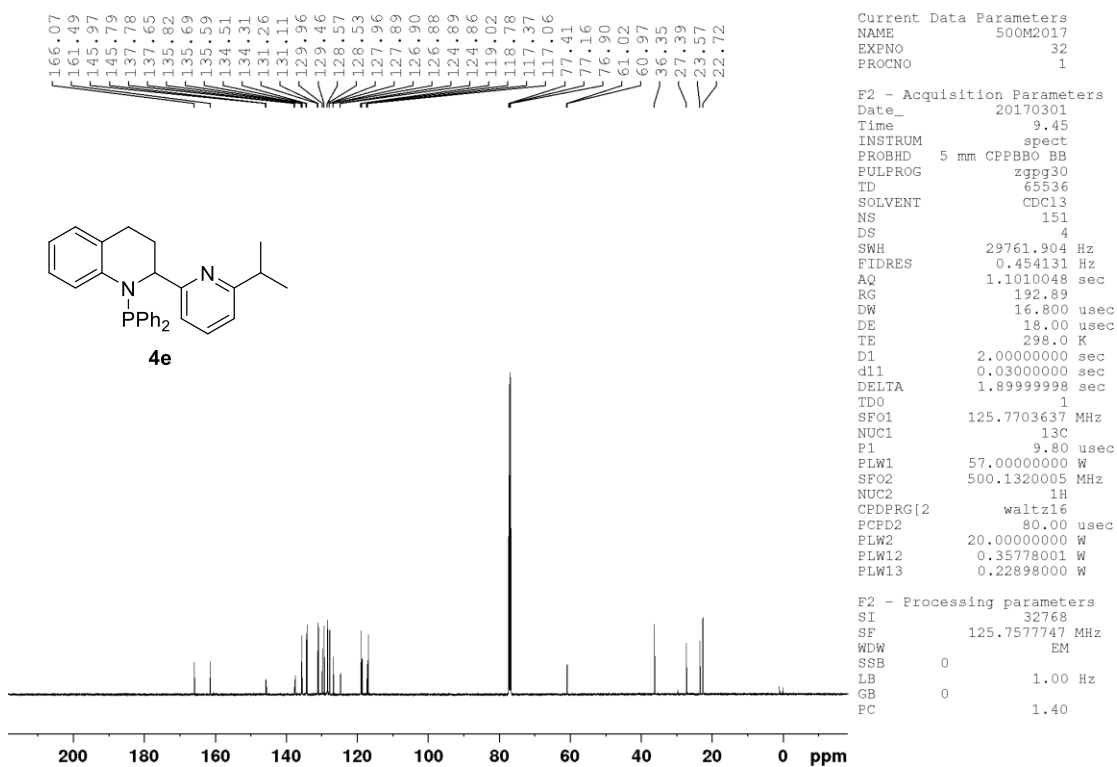

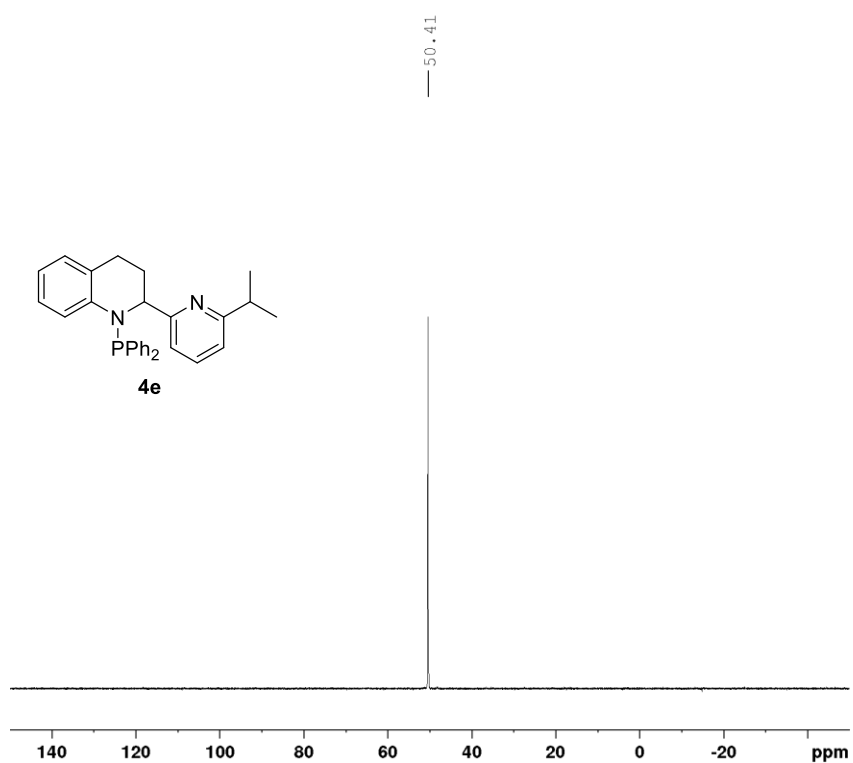

Current Data Parameters  
NAME 500M P31  
EXPNO 12  
PROCNO 1

F2 - Acquisition Parameters  
Date\_ 20170301  
Time 9.36  
INSTRUM spect  
PROBHD 5 mm CFPBBO BB  
PULPROG zgpgg  
TD 65536  
SOLVENT CDCl3  
NS 16  
DS 4  
SWH 100000.000 Hz  
FIDRES 1.525879 Hz  
AQ 0.3276800 sec  
RG 192.89  
DW 5.000 usec  
DE 18.00 usec  
TE 298.0 K  
D1 2.00000000 sec  
d11 0.03000000 sec  
DELTA 1.89999998 sec  
TD0 1  
SF01 202.4664578 MHz  
NUC1 31P  
P1 11.50 usec  
PLW1 52.96599960 W  
SF02 500.1320005 MHz  
NUC2 1H  
CPDPRG2 waltz16  
PCPD2 80.00 usec  
PLW2 20.00000000 W  
PLW12 0.35778001 W  
PLW13 0.22898000 W

F2 - Processing parameters  
SI 32768  
SF 202.4563350 MHz  
WDW EM  
SSB 0  
LB 1.00 Hz  
GB 0  
PC 1.40

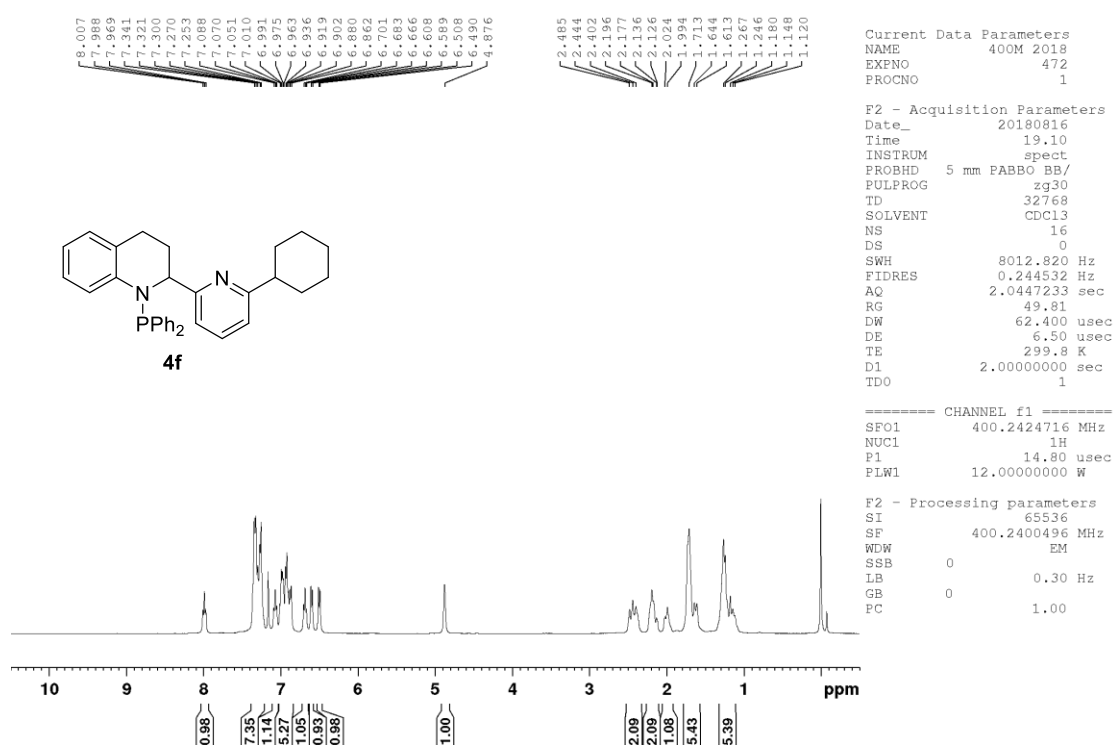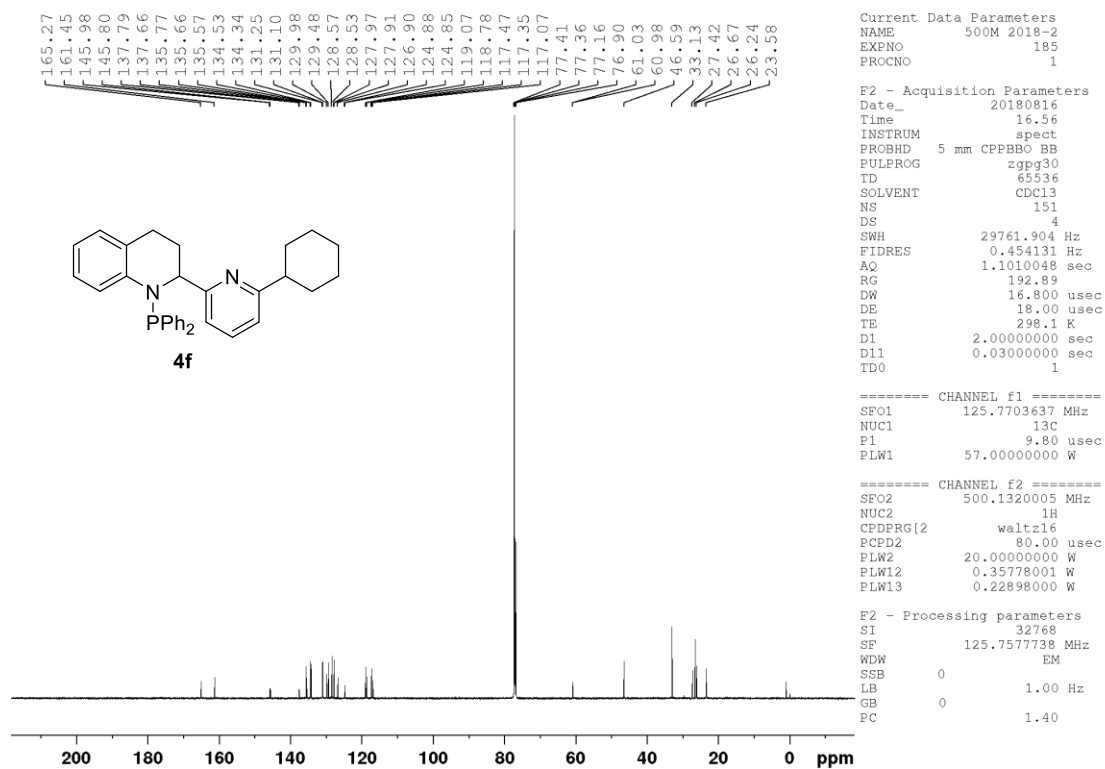



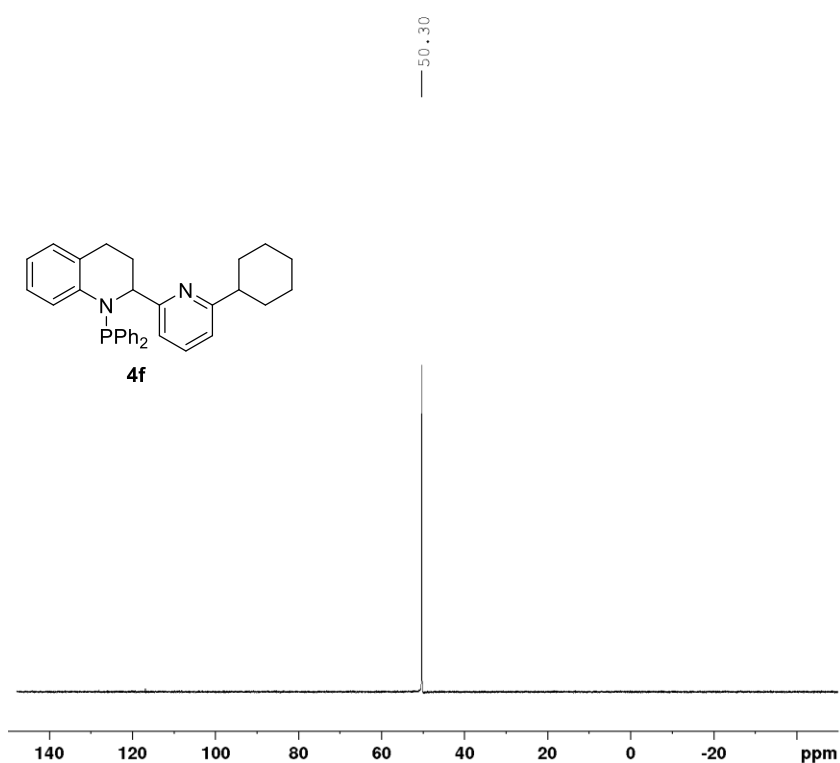

Current Data Parameters  
 NAME 400 M P31  
 EXPNO 4  
 PROCNO 1

F2 - Acquisition Parameters  
 Date\_ 20171211  
 Time 17.15  
 INSTRUM spect  
 PROBHD 5 mm PABBO BB/  
 PULPROG zgpg30  
 TD 65536  
 SOLVENT CDCl3  
 NS 16  
 DS 4  
 SWH 64102.563 Hz  
 FIDRES 0.978127 Hz  
 AQ 0.5111808 sec  
 RG 206.33  
 DW 7.800 usec  
 DE 6.50 usec  
 TE 298.6 K  
 D1 2.0000000 sec  
 d11 0.0300000 sec  
 DELTA 1.8999999 sec  
 TD0 1  
 SF01 162.0120208 MHz  
 NUC1 31P  
 P1 14.60 usec  
 PLW1 13.0000000 W  
 SF02 400.2416010 MHz  
 NUC2 1H  
 CPDPRG(2) waltz16  
 PCPD2 90.00 usec  
 PLW2 12.0000000 W  
 PLW12 0.3468000 W  
 PLW13 0.2809099 W

F2 - Processing parameters  
 SI 32768  
 SF 162.0201218 MHz  
 WDW EM  
 SSB 0  
 LB 1.00 Hz  
 GB 0  
 PC 1.40

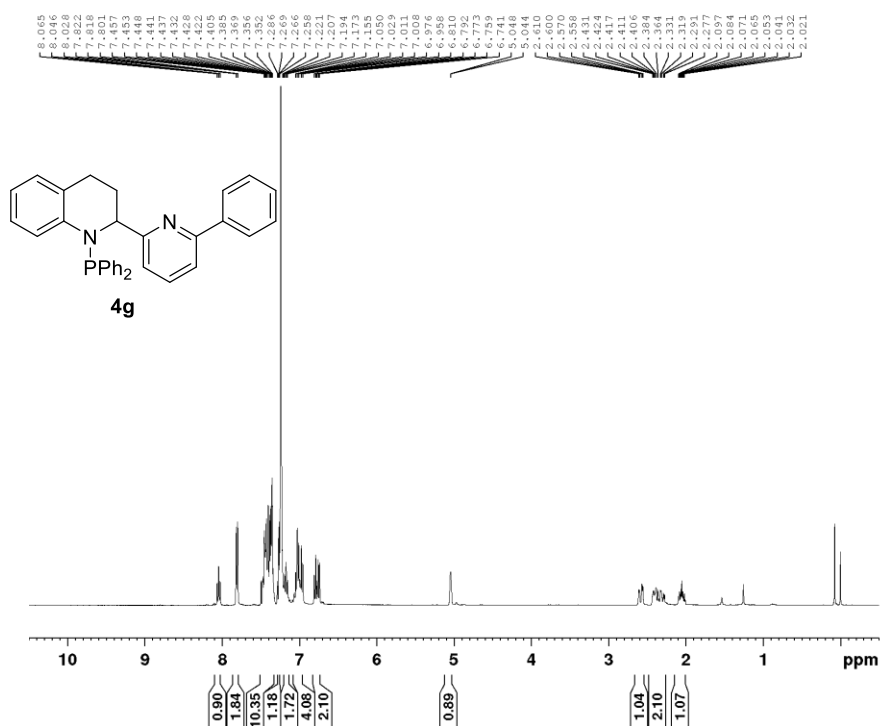

Current Data Parameters  
NAME 400M2017  
EXPNO 290  
PROCNO 1

F2 - Acquisition Parameters  
Date\_ 20171211  
Time 15.43  
INSTRUM spect  
PROBHD 5 mm PABBO BB/  
PULPROG zg30  
TD 32768  
SOLVENT CDCl3  
NS 16  
DS 0  
SWH 8012.820 Hz  
FIDRES 0.244532 Hz  
AQ 2.0447233 sec  
RG 49.81  
DW 62.400 usec  
DE 6.50 usec  
TE 298.6 K  
D1 2.00000000 sec  
TD0 1  
SF01 400.2424716 MHz  
NUC1 1H  
P1 14.80 usec  
PLW1 12.00000000 W

F2 - Processing parameters  
SI 65536  
SF 400.2400178 MHz  
WDW EM  
SSB 0  
LB 0.30 Hz  
GB 0  
PC 1.00

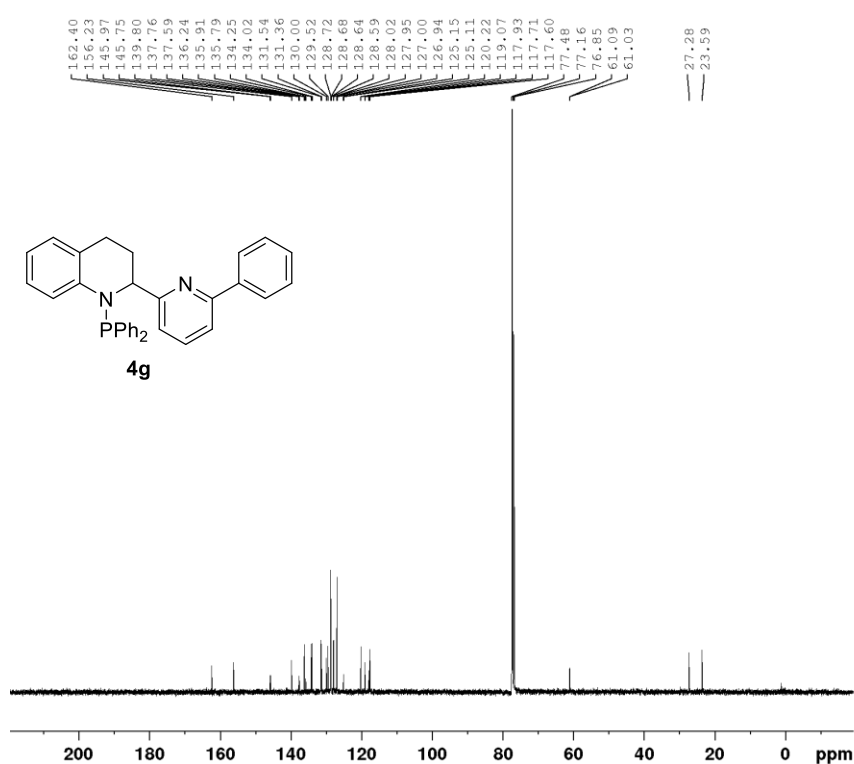

Current Data Parameters  
NAME 400M2017  
EXPNO 291  
PROCNO 1

F2 - Acquisition Parameters  
Date\_ 20171211  
Time 15.46  
INSTRUM spect  
PROBHD 5 mm PABBO BB/  
PULPROG zgpg30  
TD 65536  
SOLVENT CDCl3  
NS 470  
DS 4  
SWH 24038.461 Hz  
FIDRES 0.366798 Hz  
AQ 1.3631488 sec  
RG 206.33  
DW 20.800 usec  
DE 6.50 usec  
TE 298.8 K  
D1 2.00000000 sec  
d11 0.03000000 sec  
DELTA 1.89999999 sec  
TD0 1  
SF01 100.6504916 MHz  
NUC1 13C  
P1 10.00 usec  
PLW1 54.00000000 W  
SFO2 400.2416010 MHz  
NUC2 1H  
CPDPRG[2] waltz16  
PCPD2 90.00 usec  
PLW2 12.00000000 W  
PLW12 0.34680000 W  
PLW13 0.28090999 W

F2 - Processing parameters  
SI 32768  
SF 100.6404151 MHz  
WDW EM  
SSB 0  
LB 1.00 Hz  
GB 0  
PC 1.40

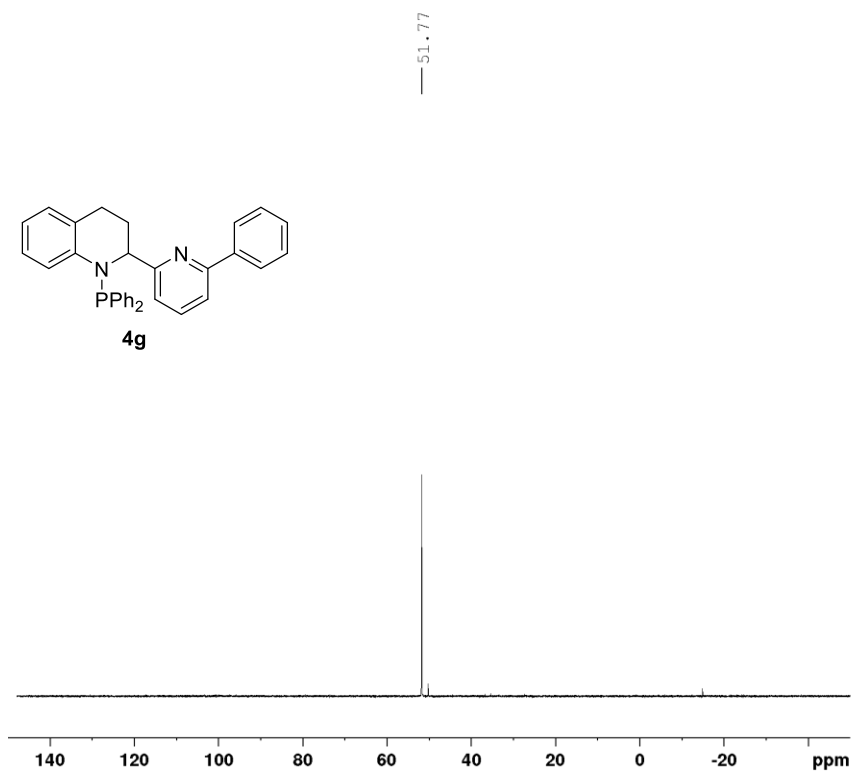

Current Data Parameters  
NAME 400 M P31  
EXPNO 5  
PROCNO 1

F2 - Acquisition Parameters  
Date\_ 20171211  
Time 17.18  
INSTRUM spect  
PROBHD 5 mm PABBO BB/  
PULPROG zgpg30  
TD 65536  
SOLVENT CDCl3  
NS 16  
DS 4  
SWH 64102.563 Hz  
FIDRES 0.978127 Hz  
AQ 0.5111808 sec  
RG 206.33  
DW 7.800 usec  
DE 6.50 usec  
TE 298.7 K  
D1 2.0000000 sec  
d11 0.0300000 sec  
DELTA 1.89999998 sec  
TD0 1  
SF01 162.0120208 MHz  
NUC1 31P  
P1 14.60 usec  
PLW1 13.00000000 W  
SF02 400.2416010 MHz  
NUC2 1H  
CPDPRG12 waltz16  
PCPD2 90.00 usec  
PLW2 12.00000000 W  
PLW12 0.34680000 W  
PLW13 0.28090999 W

F2 - Processing parameters  
SI 32768  
SF 162.0201218 MHz  
WDW EM  
SSB 0  
LB 1.00 Hz  
GB 0  
PC 1.40

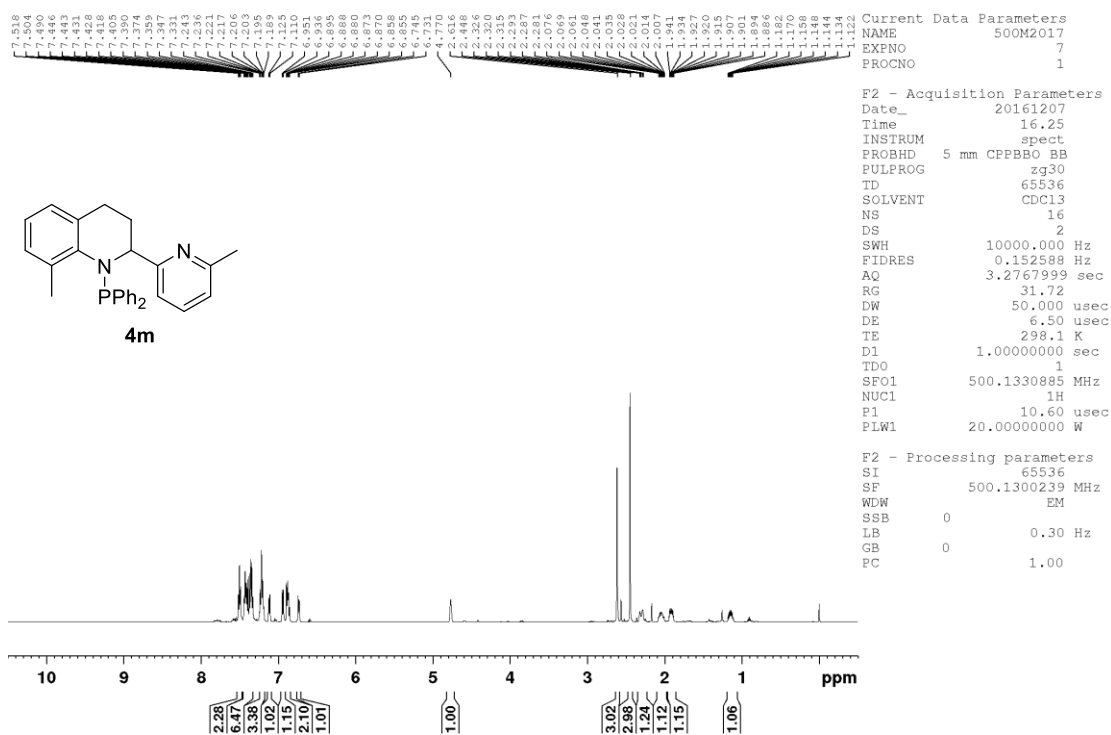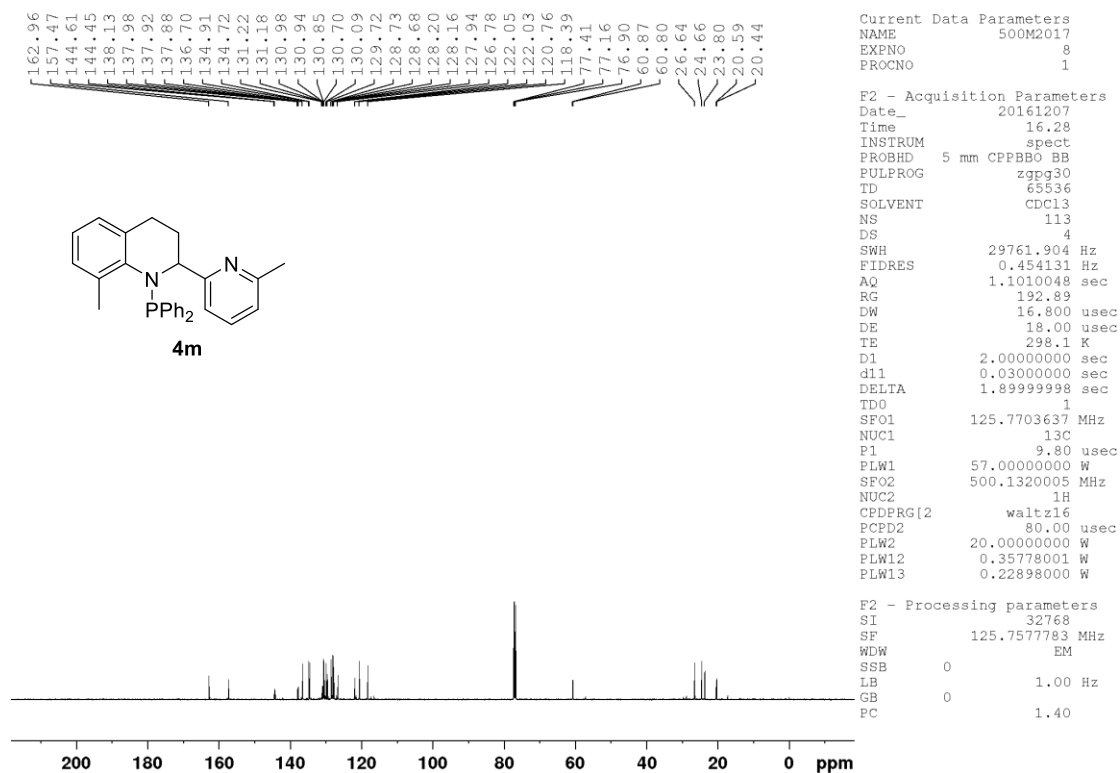

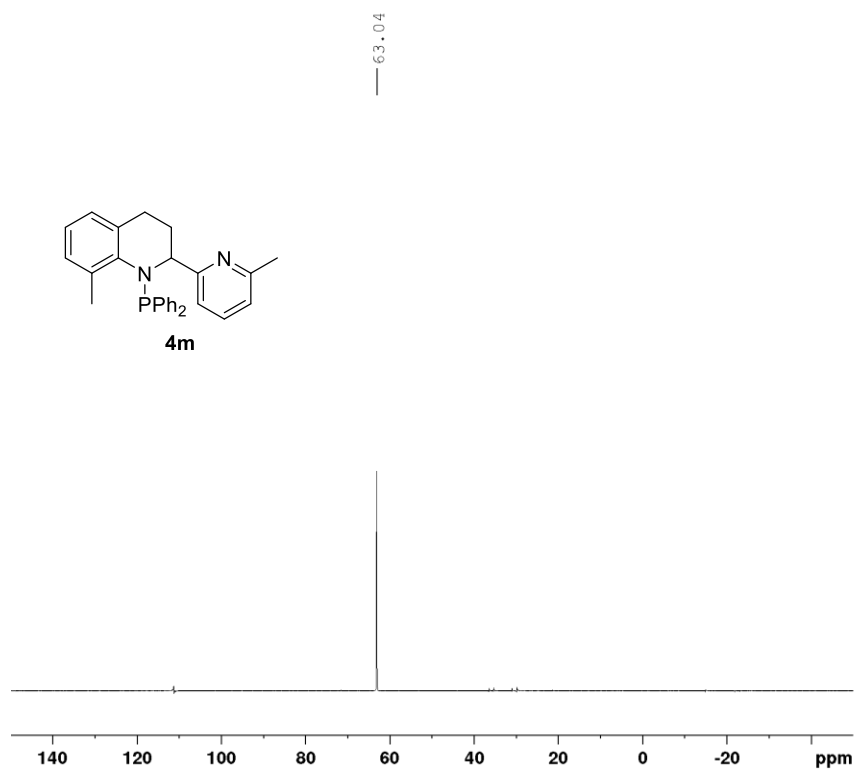

Current Data Parameters  
NAME 500M P31  
EXPNO 5  
PROCNO 1

F2 - Acquisition Parameters  
Date\_ 20161207  
Time 16.13  
INSTRUM spect  
PROBHD 5 mm CPBBO BB  
PULPROG zgpg  
TD 65536  
SOLVENT CDCl3  
NS 16  
DS 4  
SWH 100000.000 Hz  
FIDRES 1.525879 Hz  
AQ 0.3276800 sec  
RG 192.89  
DW 5.000 usec  
DE 18.00 usec  
TE 298.0 K  
D1 2.00000000 sec  
d11 0.03000000 sec  
DELTA 1.89999998 sec  
TD0 1  
SF01 202.4664578 MHz  
NUC1 31P  
P1 11.50 usec  
PLW1 52.96599960 W  
SF02 500.1320005 MHz  
NUC2 1H  
CPDPRG[2] waltz16  
PCPD2 80.00 usec  
PLW2 20.00000000 W  
PLW12 0.35778001 W  
PLW13 0.22898000 W

F2 - Processing parameters  
SI 32768  
SF 202.4563350 MHz  
WDW EM  
SSB 0  
LB 1.00 Hz  
GB 0  
PC 1.40

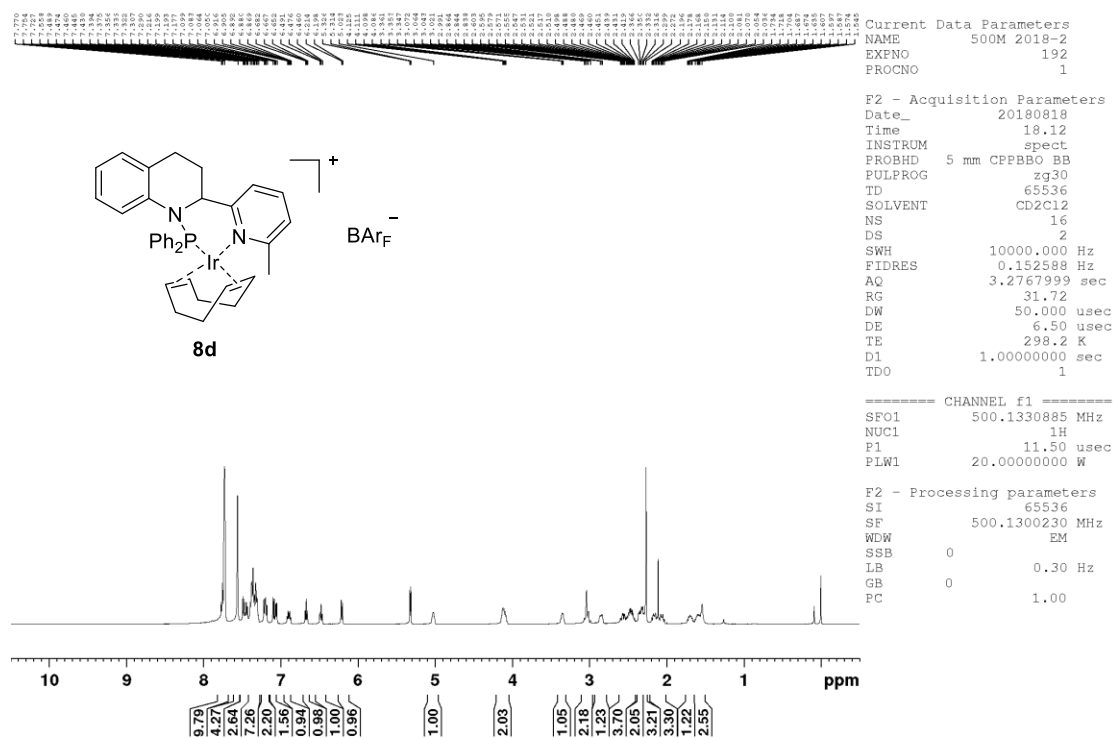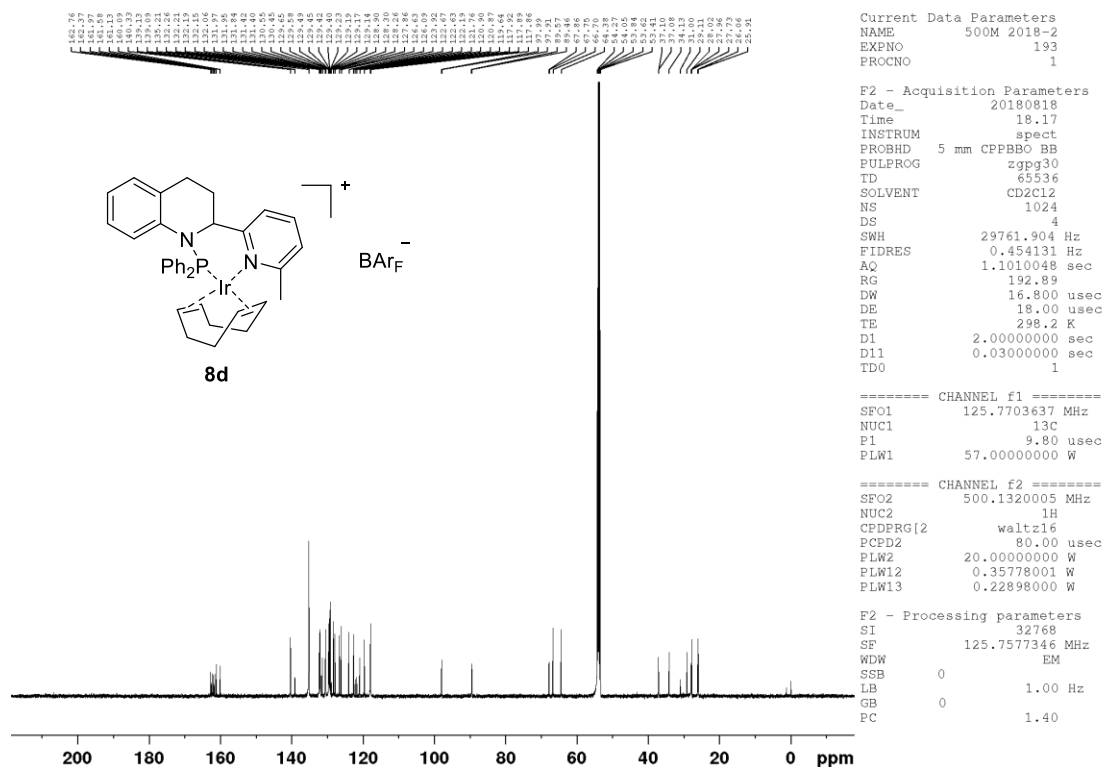

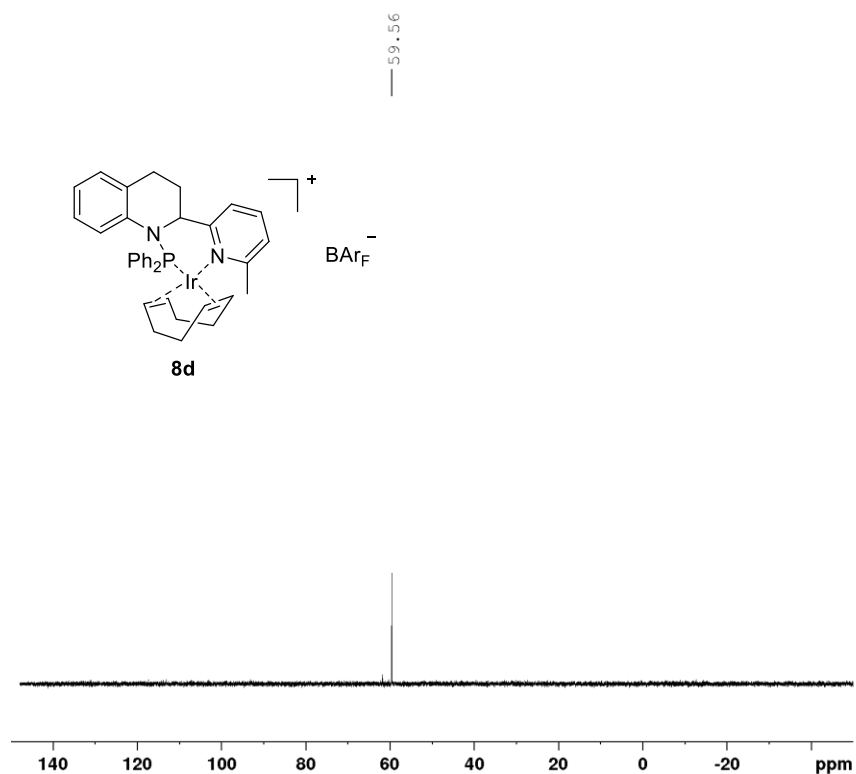

Current Data Parameters

|        |           |
|--------|-----------|
| NAME   | 400 M P31 |
| EXPNO  | 11        |
| PROCNO | 1         |

F2 - Acquisition Parameters

|           |                 |
|-----------|-----------------|
| Date_     | 20171211        |
| Time      | 21.08           |
| INSTRUM   | spect           |
| PROBHD    | 5 mm PABBO BB/  |
| PULPROG   | zgpg30          |
| TD        | 65536           |
| SOLVENT   | Acetone         |
| NS        | 16              |
| DS        | 4               |
| SWH       | 64102.563 Hz    |
| FIDRES    | 0.978127 Hz     |
| AQ        | 0.5111808 sec   |
| RG        | 206.33          |
| DW        | 7.800 usec      |
| DE        | 6.50 usec       |
| TE        | 298.3 K         |
| D1        | 2.00000000 sec  |
| d11       | 0.03000000 sec  |
| DELTA     | 1.89999998 sec  |
| TD0       | 1               |
| SFO1      | 162.0120208 MHz |
| NUC1      | 31P             |
| P1        | 14.60 usec      |
| PLW1      | 13.00000000 W   |
| SFO2      | 400.2416010 MHz |
| NUC2      | 1H              |
| CPDPRG[2] | waltz16         |
| PCPD2     | 90.00 usec      |
| PLW2      | 12.00000000 W   |
| PLW12     | 0.34680000 W    |
| PLW13     | 0.28090999 W    |

F2 - Processing parameters

|     |                 |
|-----|-----------------|
| SI  | 32768           |
| SF  | 162.0201218 MHz |
| WDW | EM              |
| SSB | 0               |
| LB  | 1.00 Hz         |
| GB  | 0               |
| PC  | 1.40            |

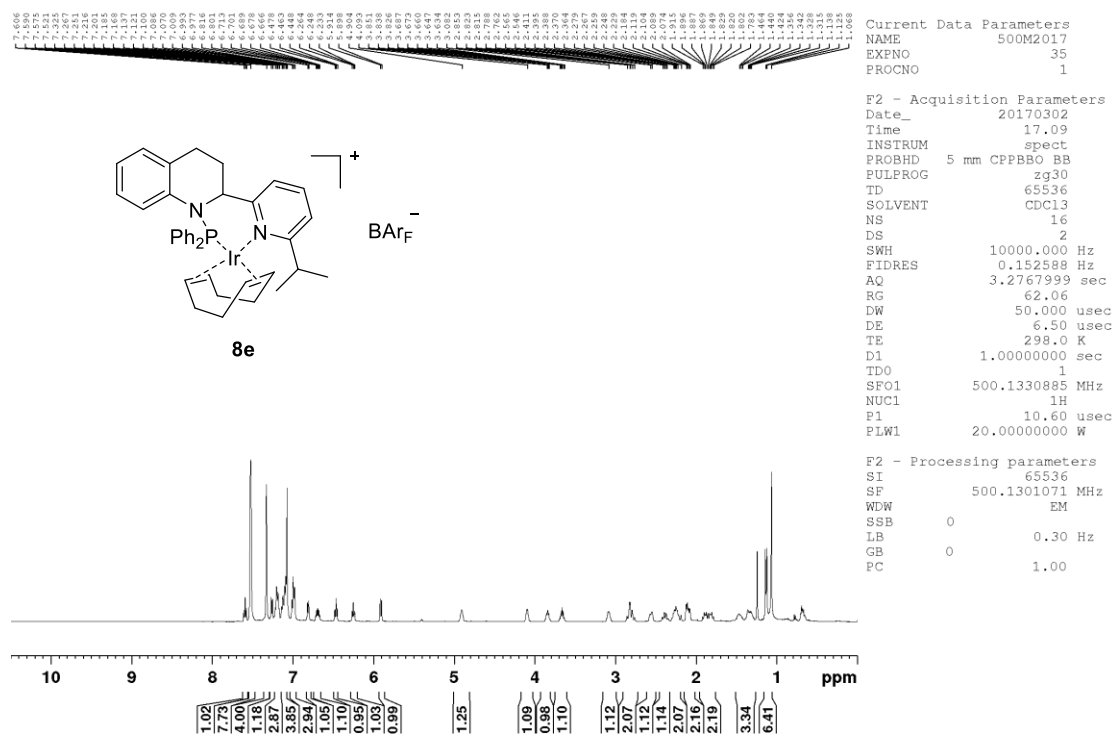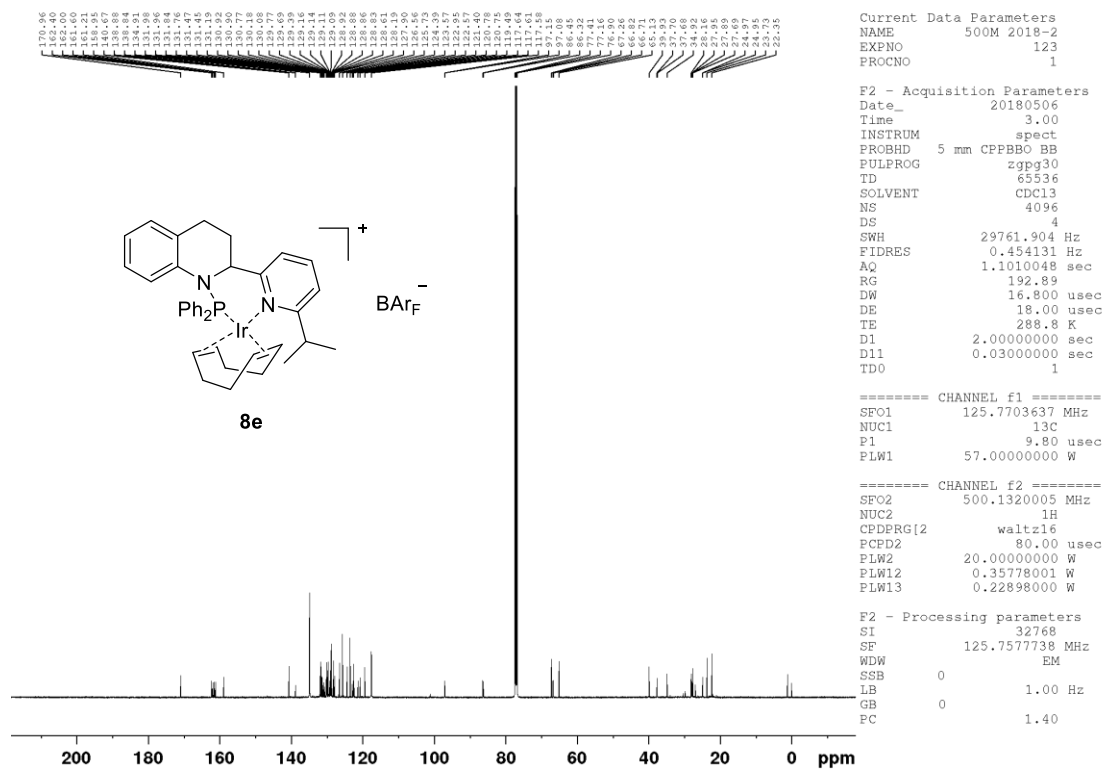



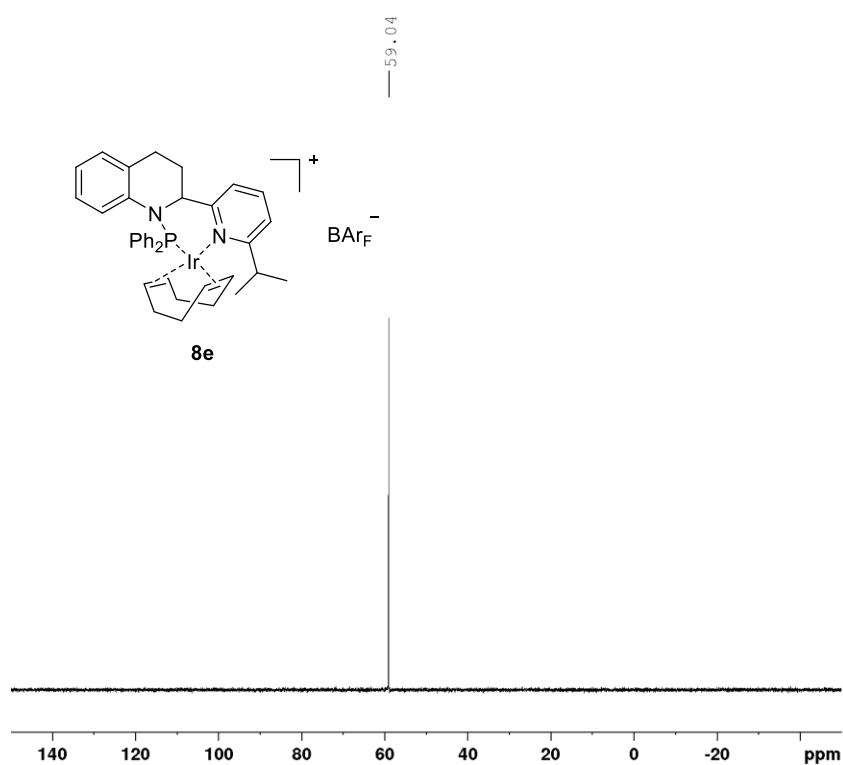

Current Data Parameters  
NAME 500M P31  
EXPNO 17  
PROCNO 1

F2 - Acquisition Parameters  
Date\_ 20170302  
Time 17.05  
INSTRUM spect  
PROBHD 5 mm CFPBBO BB  
PULPROG zgpg  
TD 65536  
SOLVENT CDCl3  
NS 16  
DS 4  
SWH 100000.000 Hz  
FIDRES 1.525879 Hz  
AQ 0.3276800 sec  
RG 192.89  
DW 5.000 usec  
DE 18.00 usec  
TE 298.0 K  
D1 2.00000000 sec  
d11 0.03000000 sec  
DELTA 1.89999998 sec  
TD0 1  
SFO1 202.4664578 MHz  
NUC1 31P  
P1 11.50 usec  
PLW1 52.96599960 W  
SFO2 500.1320005 MHz  
NUC2 1H  
CPDPRG[2] waltz16  
PCPD2 80.00 usec  
PLW2 20.00000000 W  
PLW12 0.35778001 W  
PLW13 0.22898000 W

F2 - Processing parameters  
SI 32768  
SF 202.4563350 MHz  
WDW EM  
SSB 0  
LB 1.00 Hz  
GB 0  
PC 1.40

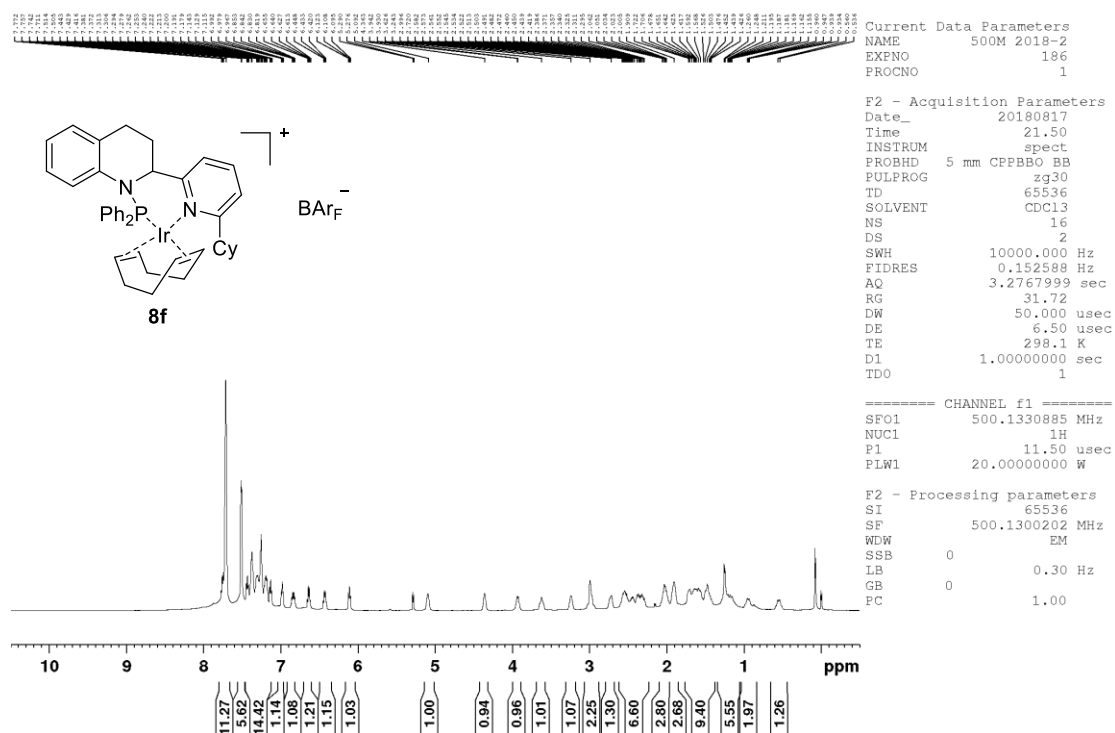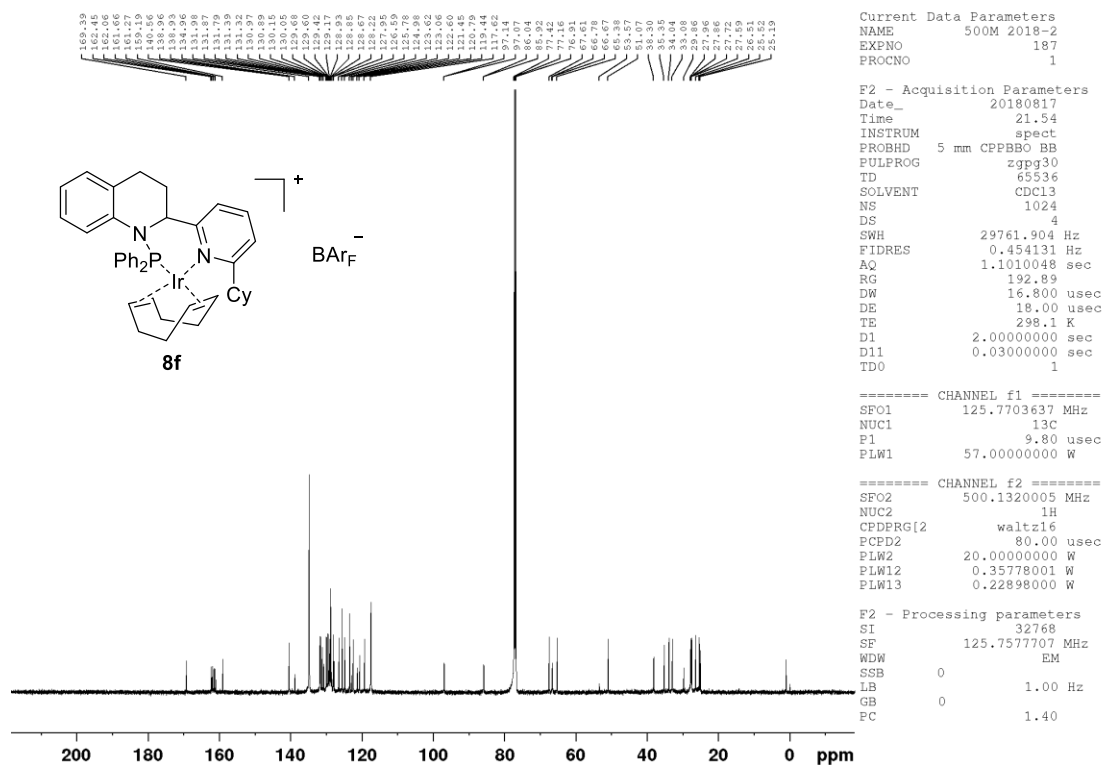

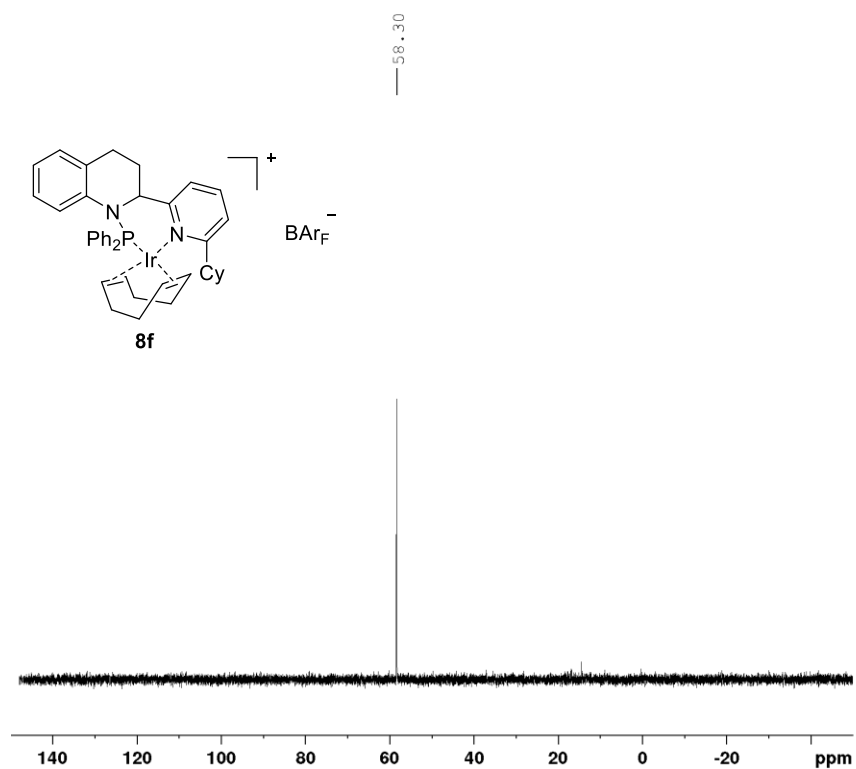

Current Data Parameters  
NAME 400 M P31  
EXPNO 12  
PROCNO 1

F2 - Acquisition Parameters  
Date\_ 20171211  
Time 21.10  
INSTRUM spect  
PROBHD 5 mm PABBO BB/  
PULPROG zgpg30  
TD 65536  
SOLVENT Acetone  
NS 16  
DS 4  
SWH 64102.563 Hz  
FIDRES 0.978127 Hz  
AQ 0.5111808 sec  
RG 206.33  
DW 7.800 usec  
DE 6.50 usec  
TE 298.5 K  
D1 2.00000000 sec  
d11 0.03000000 sec  
DELTA 1.89999998 sec  
TD0 1  
SFO1 162.0120208 MHz  
NUC1 31P  
P1 14.60 usec  
PLW1 13.00000000 W  
SFO2 400.2416010 MHz  
NUC2 1H  
CPDPRG[2] waltz16  
PCPD2 90.00 usec  
PLW2 12.00000000 W  
PLW12 0.34680000 W  
PLW13 0.28090999 W

F2 - Processing parameters  
SI 32768  
SF 162.0201218 MHz  
WDW EM  
SSB 0  
LB 1.00 Hz  
GB 0  
PC 1.40

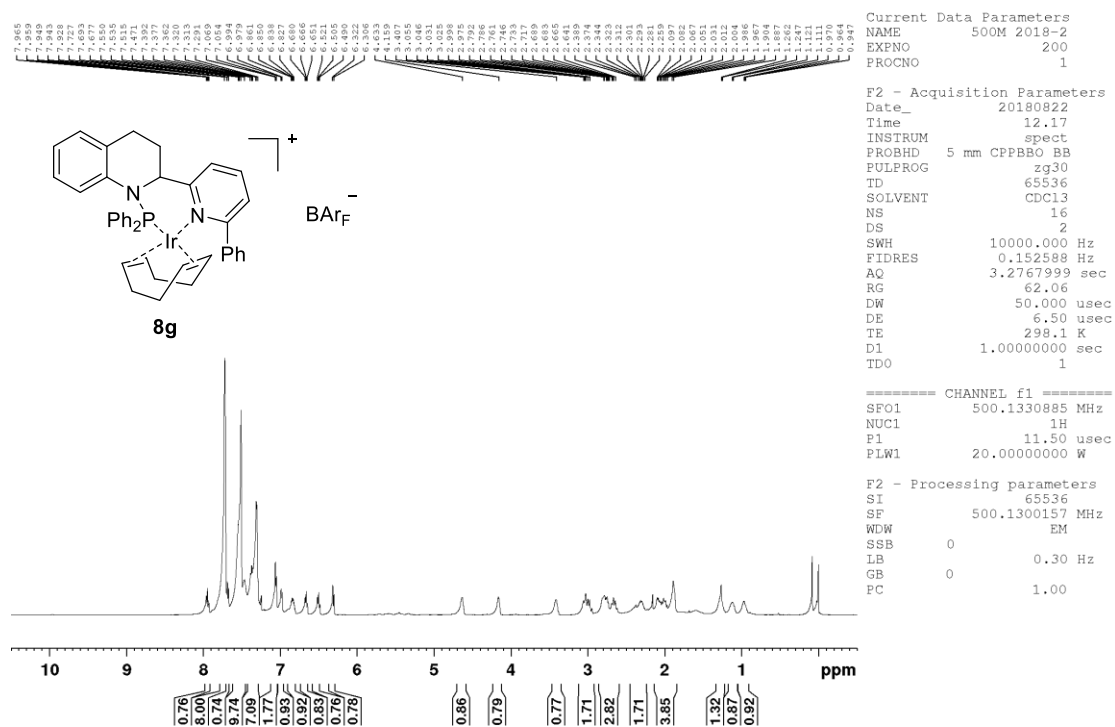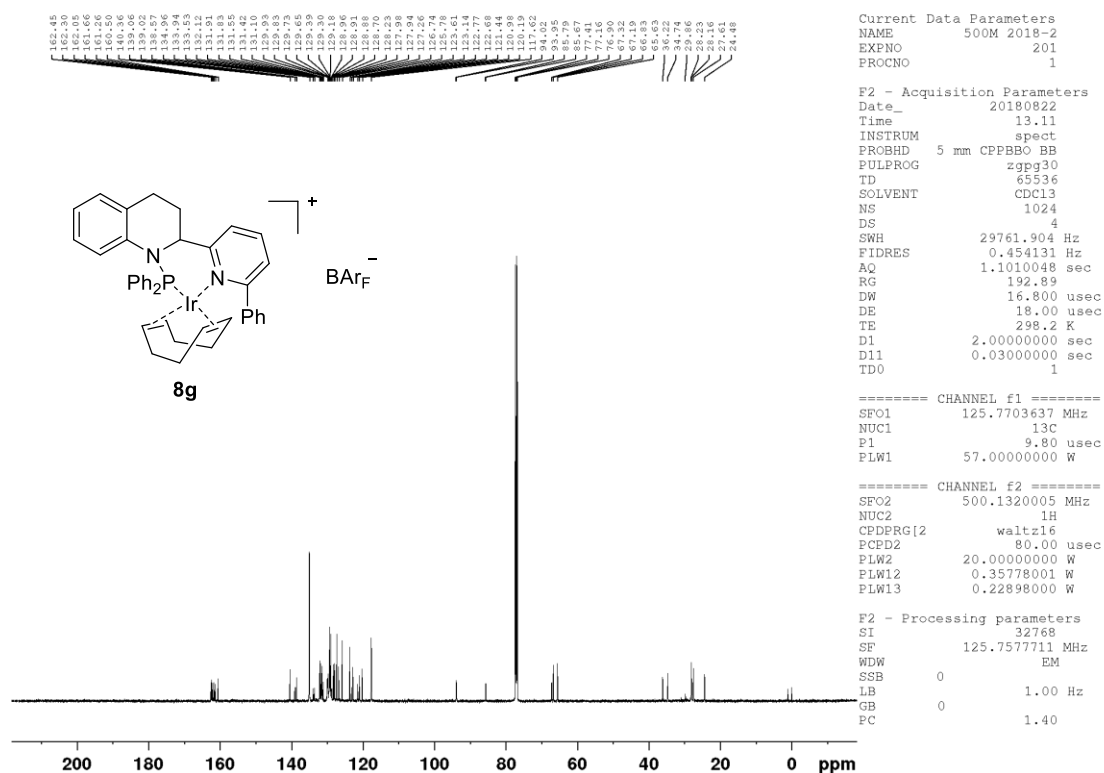

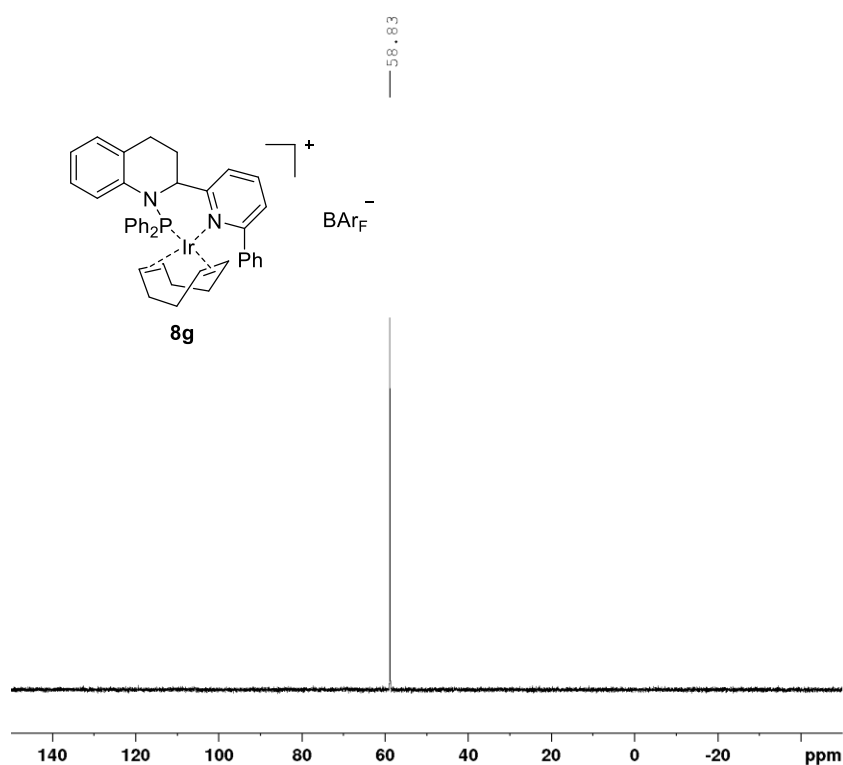

Current Data Parameters  
NAME 500M P31  
EXPNO 11  
PROCNO 1

F2 - Acquisition Parameters  
Date\_ 20161228  
Time 9.38  
INSTRUM spect  
PROBHD 5 mm CFPBBO BB  
PULPROG zgpg  
TD 65536  
SOLVENT CDCl3  
NS 16  
DS 4  
SWH 100000.000 Hz  
FIDRES 1.525879 Hz  
AQ 0.3276800 sec  
RG 192.89  
DW 5.000 usec  
DE 18.00 usec  
TE 298.0 K  
D1 2.00000000 sec  
d11 0.03000000 sec  
DELTA 1.89999998 sec  
TD0 1  
SF01 202.4664578 MHz  
NUC1 31P  
P1 11.50 usec  
PLW1 52.96599960 W  
SF02 500.1320005 MHz  
NUC2 1H  
CPDPRG[2] waltz16  
PCPD2 80.00 usec  
PLW2 20.00000000 W  
PLW12 0.35778001 W  
PLW13 0.22898000 W

F2 - Processing parameters  
SI 32768  
SF 202.4563350 MHz  
WDW EM  
SSB 0  
LB 1.00 Hz  
GB 0  
PC 1.40

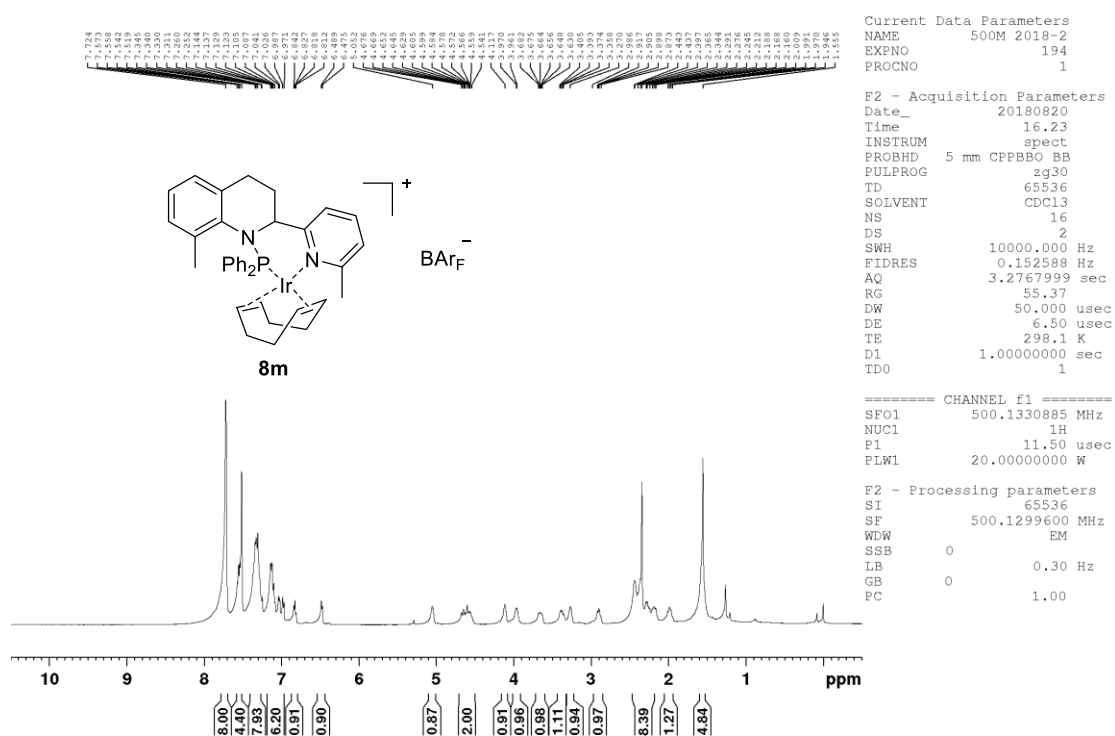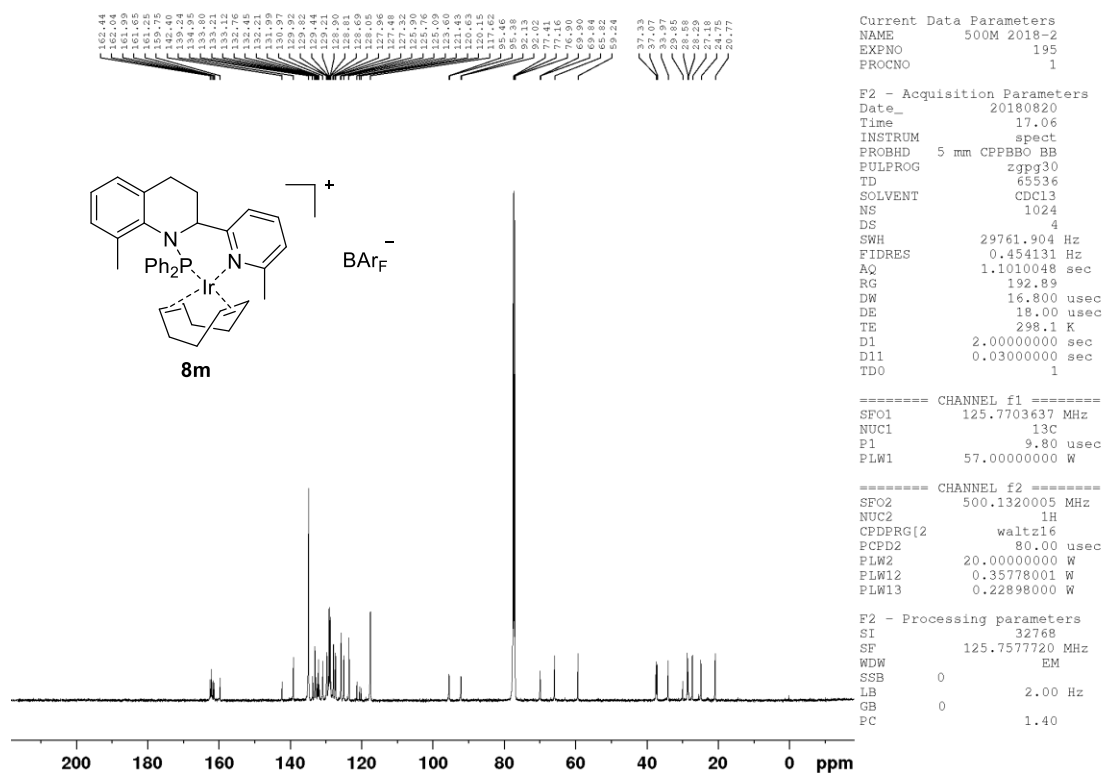

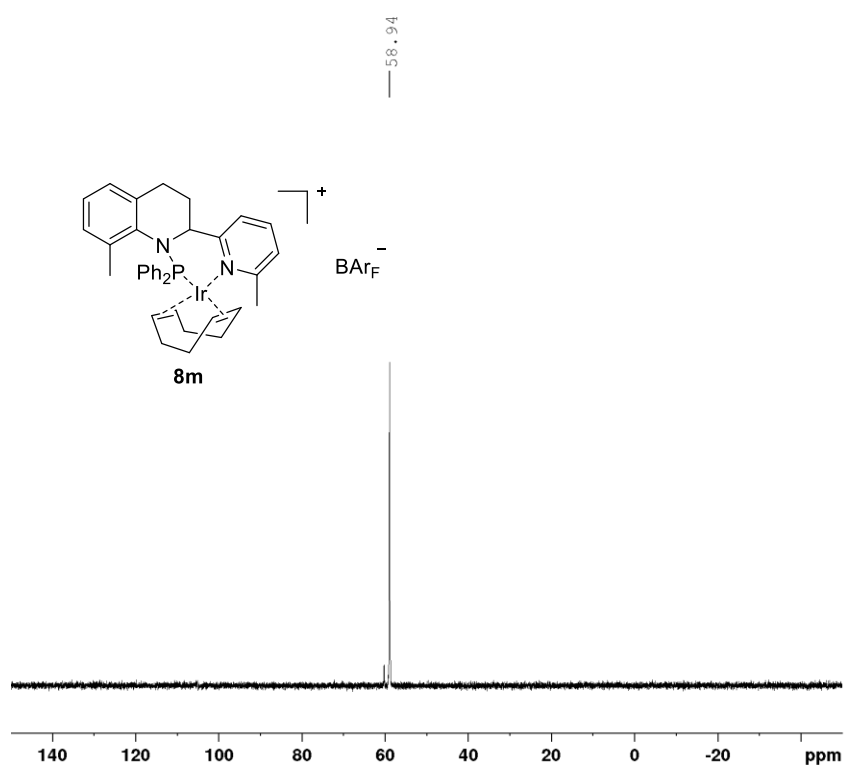

Current Data Parameters  
NAME 500M P31  
EXPNO 6  
PROCNO 1

F2 - Acquisition Parameters  
Date\_ 20161207  
Time 16.15  
INSTRUM spect  
PROBHD 5 mm CFPBBO BB  
PULPROG zgpg  
TD 65536  
SOLVENT CDCl<sub>3</sub>  
NS 16  
DS 4  
SWH 100000.000 Hz  
FIDRES 1.525879 Hz  
AQ 0.3276800 sec  
RG 192.89  
DW 5.000 usec  
DE 18.00 usec  
TE 298.0 K  
D1 2.00000000 sec  
d11 0.03000000 sec  
DELTA 1.89999998 sec  
TD0 1  
SF01 202.4664578 MHz  
NUC1 31P  
P1 11.50 usec  
PLW1 52.96599960 W  
SF02 500.1320005 MHz  
NUC2 1H  
CPDPRG[2] waltz16  
PCPD2 80.00 usec  
PLW2 20.00000000 W  
PLW12 0.35778001 W  
PLW13 0.22898000 W

F2 - Processing parameters  
SI 32768  
SF 202.4563350 MHz  
WDW EM  
SSB 0  
LB 1.00 Hz  
GB 0  
PC 1.40

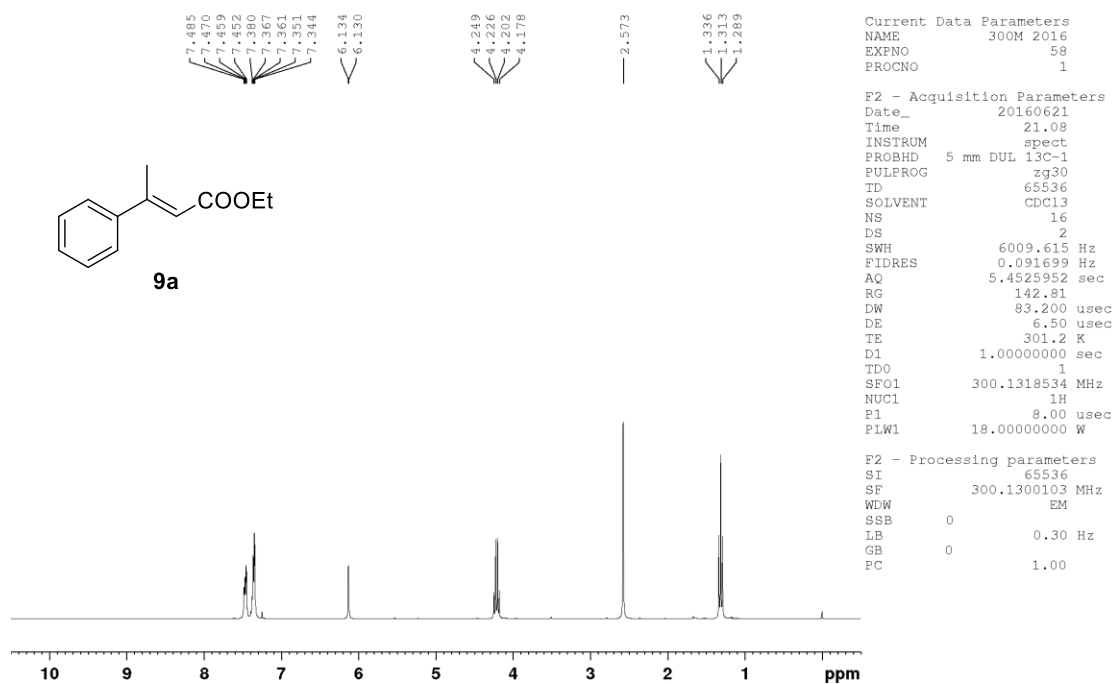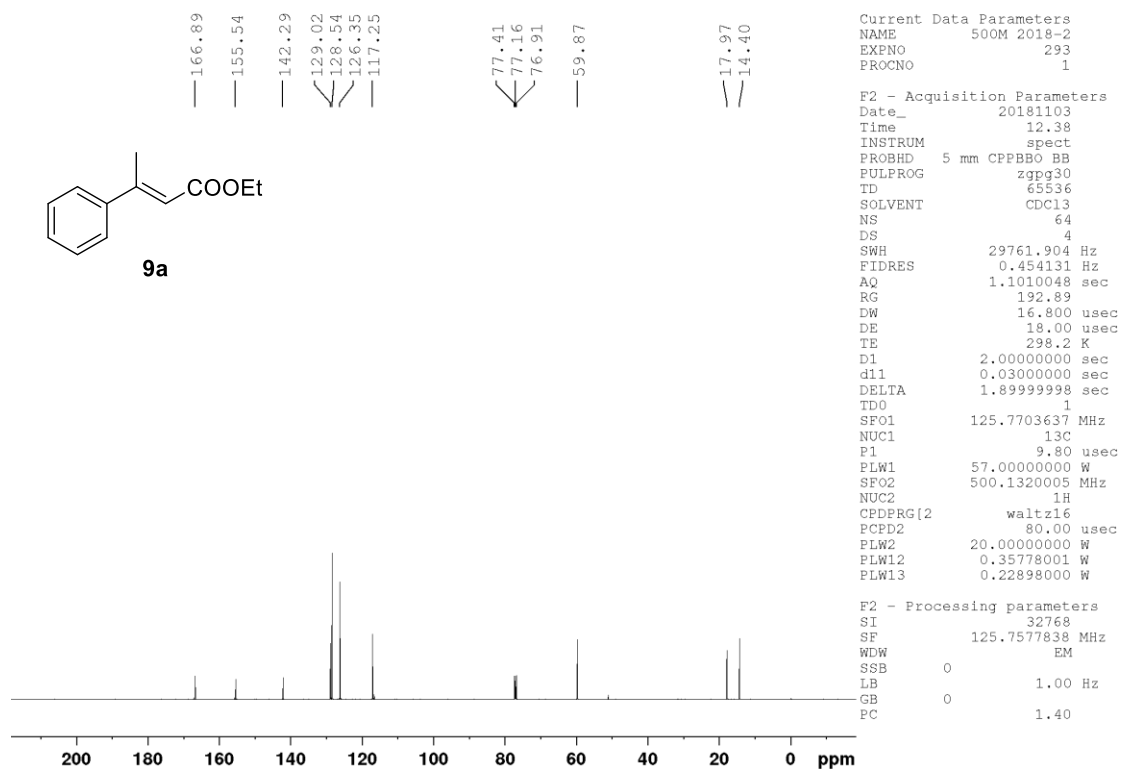



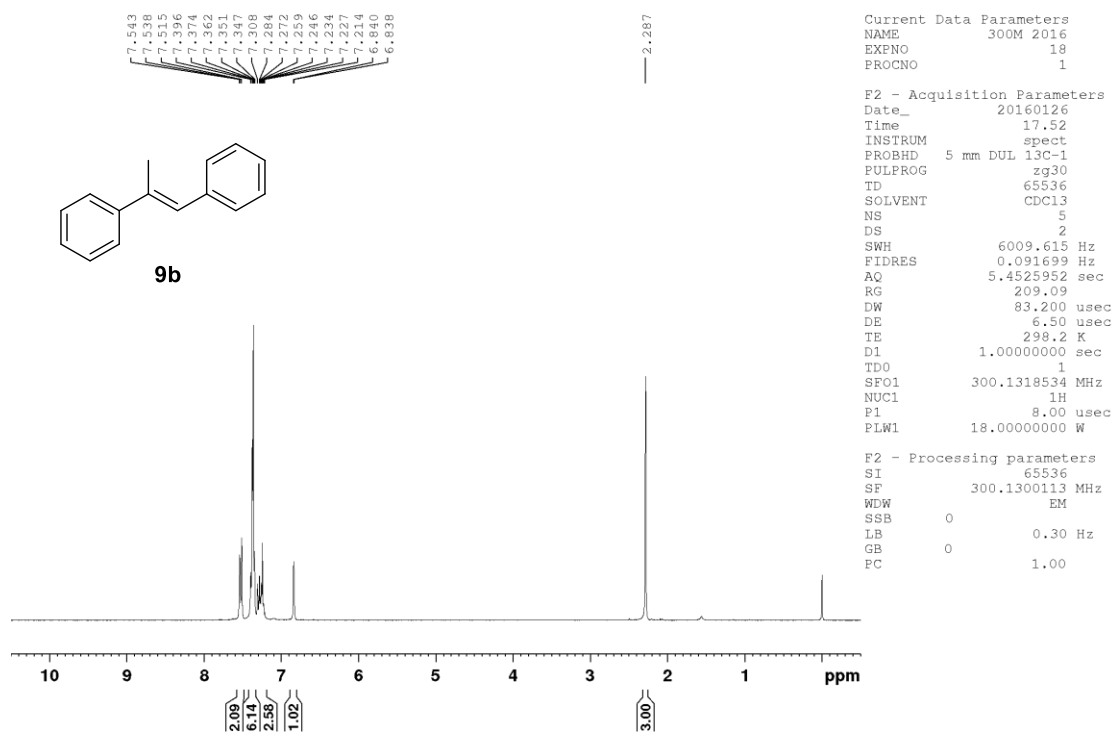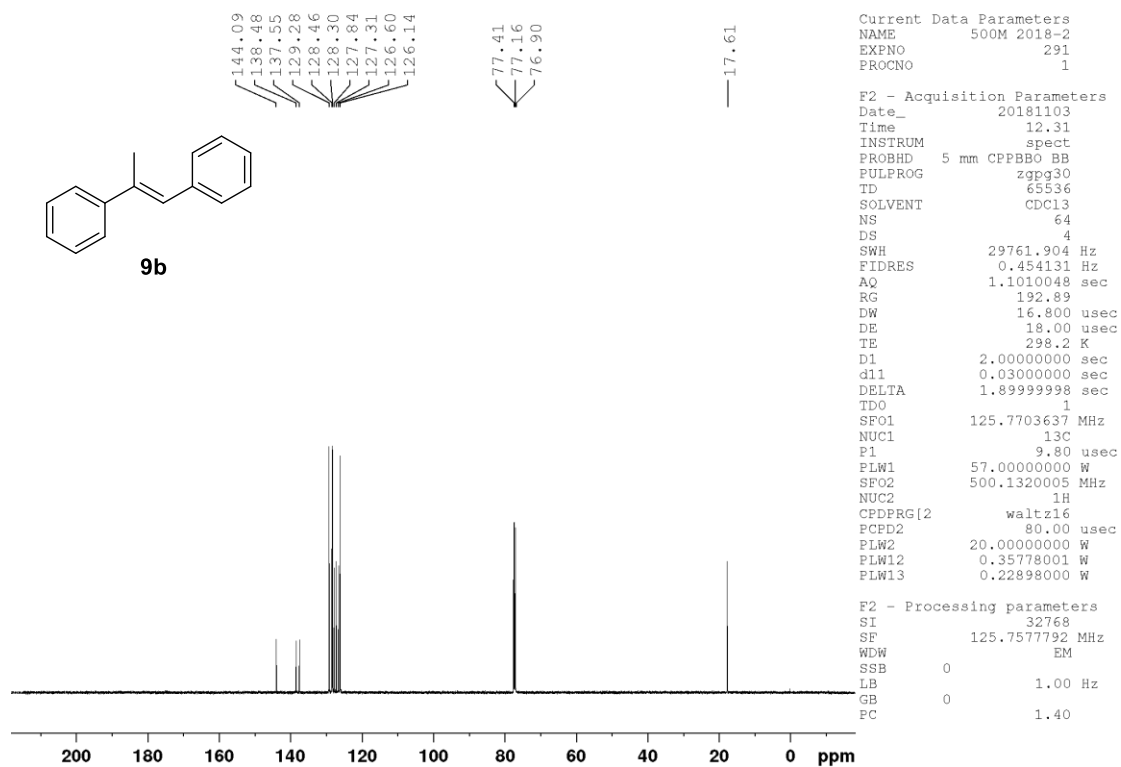

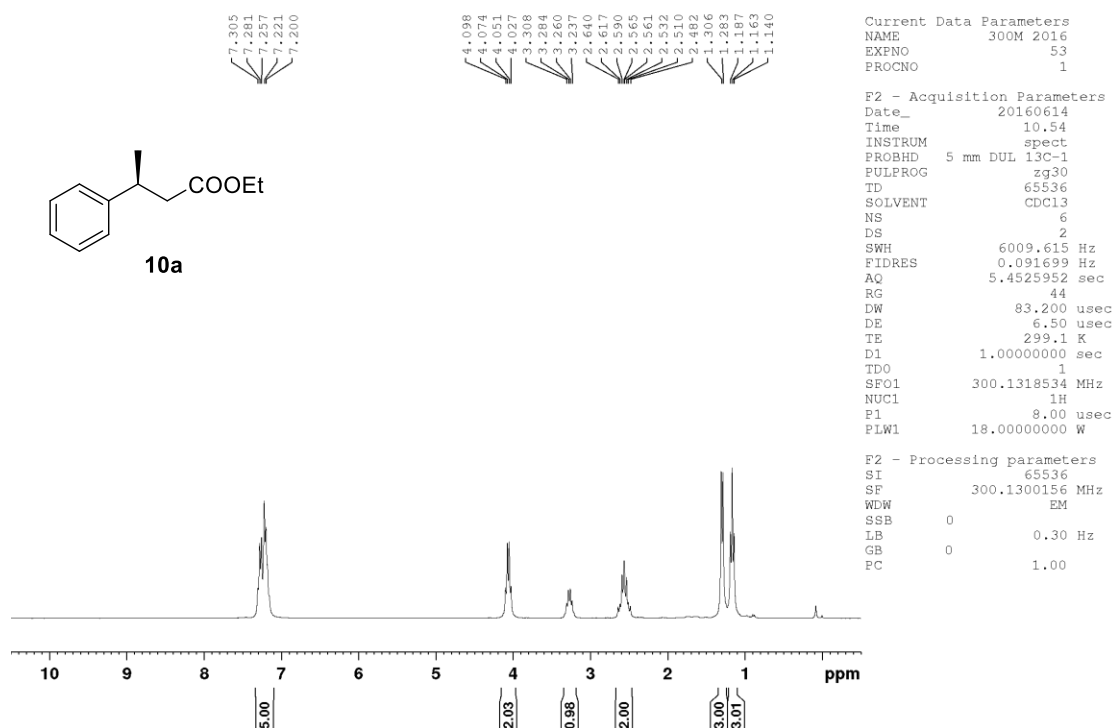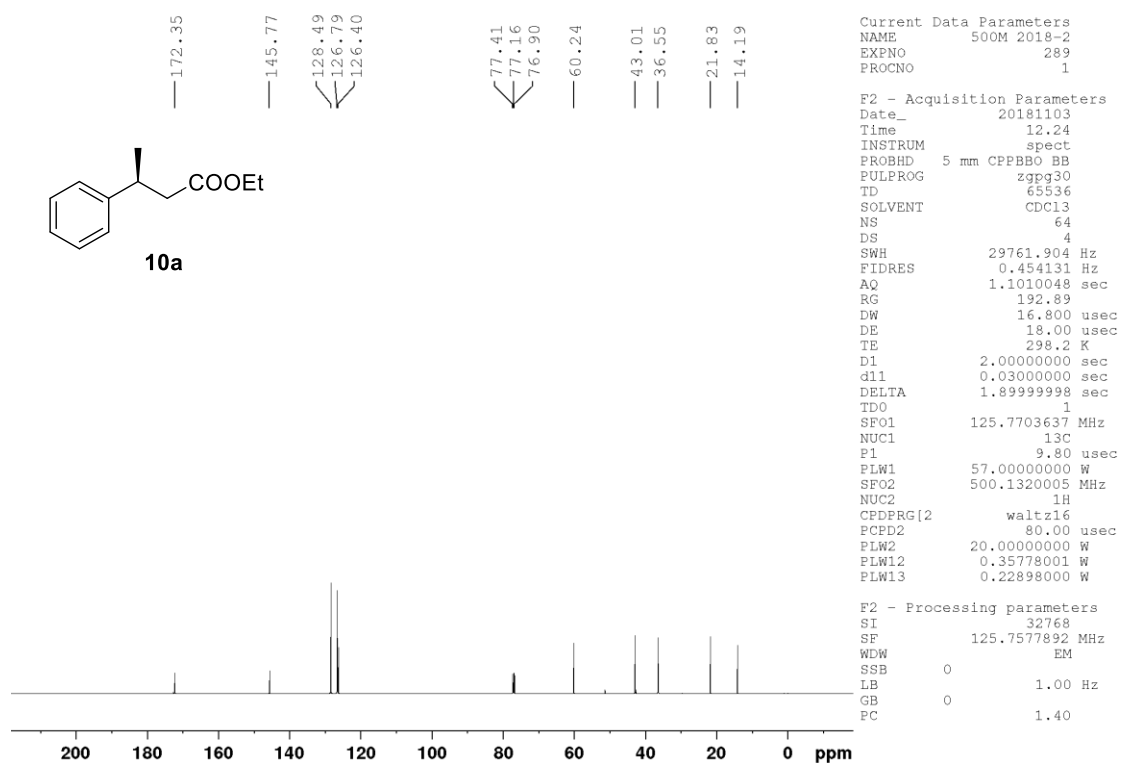

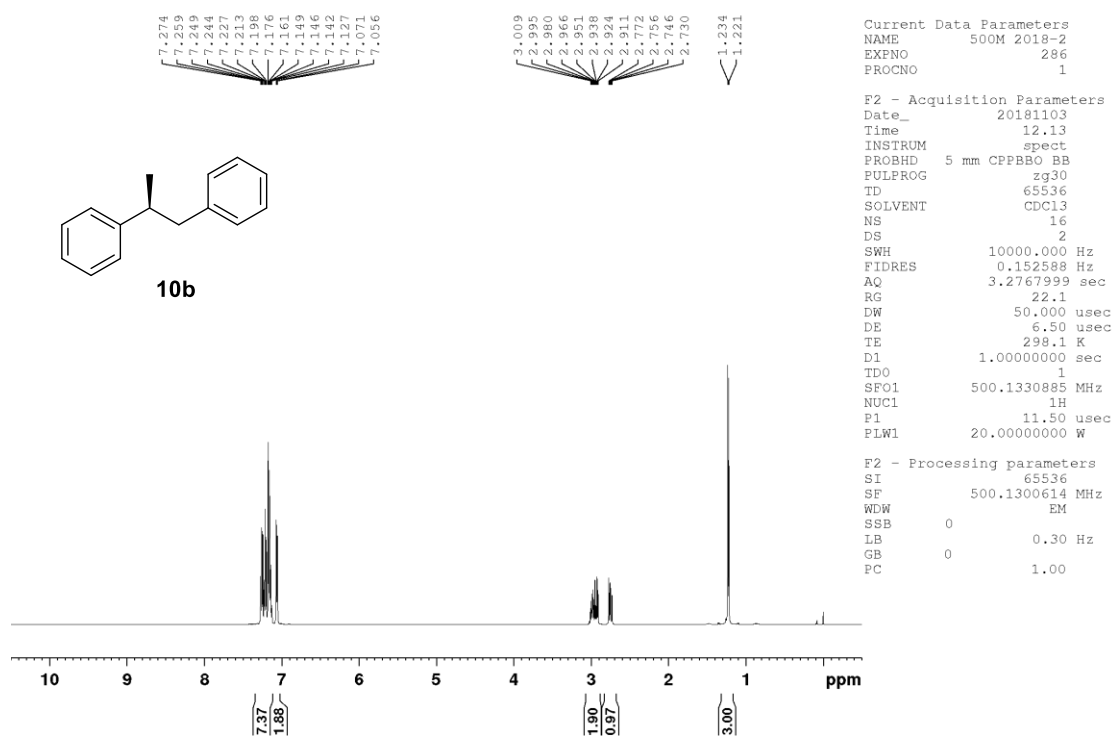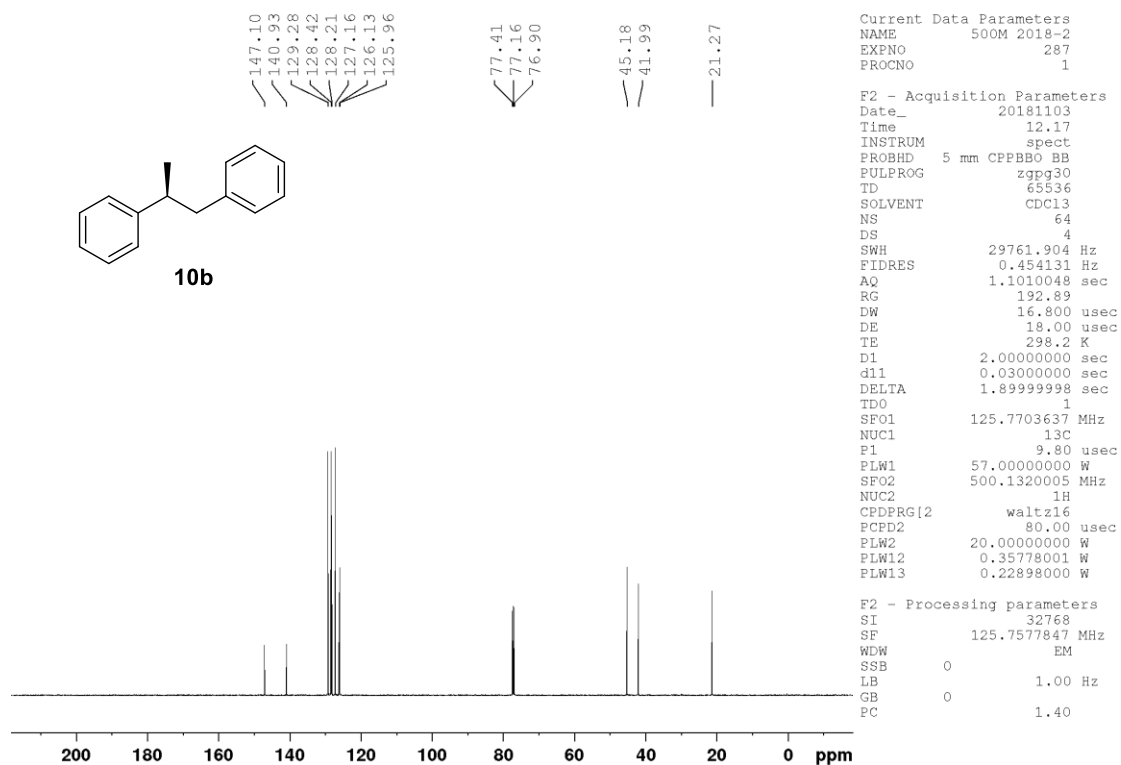

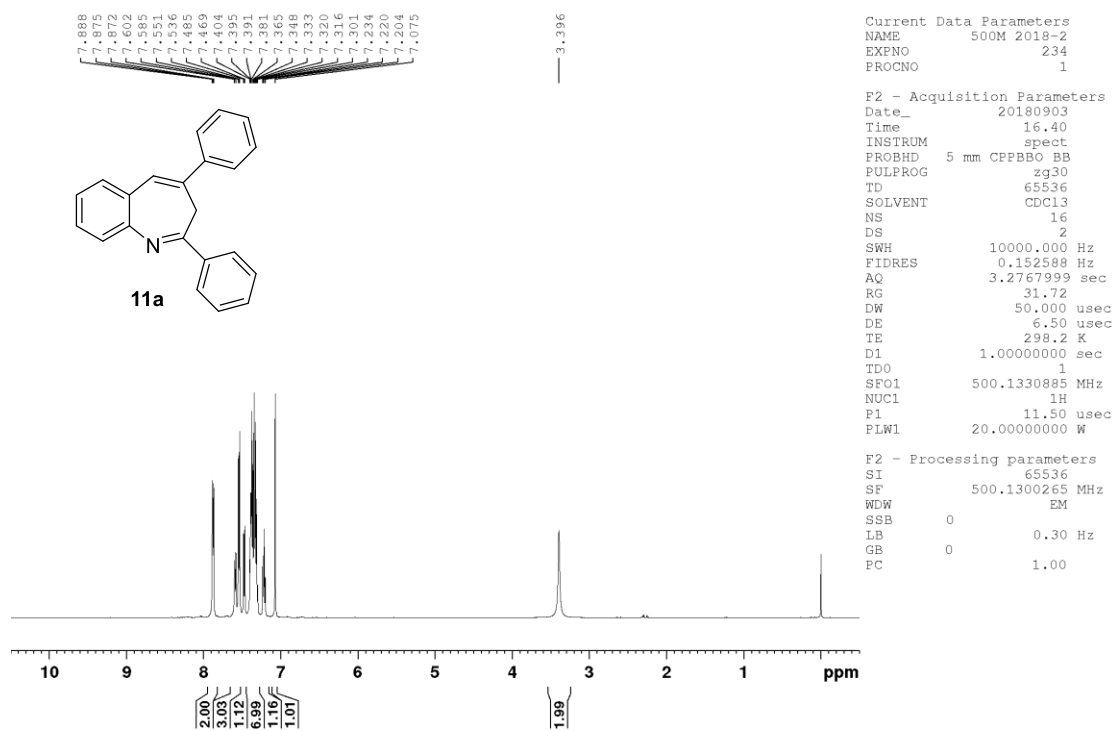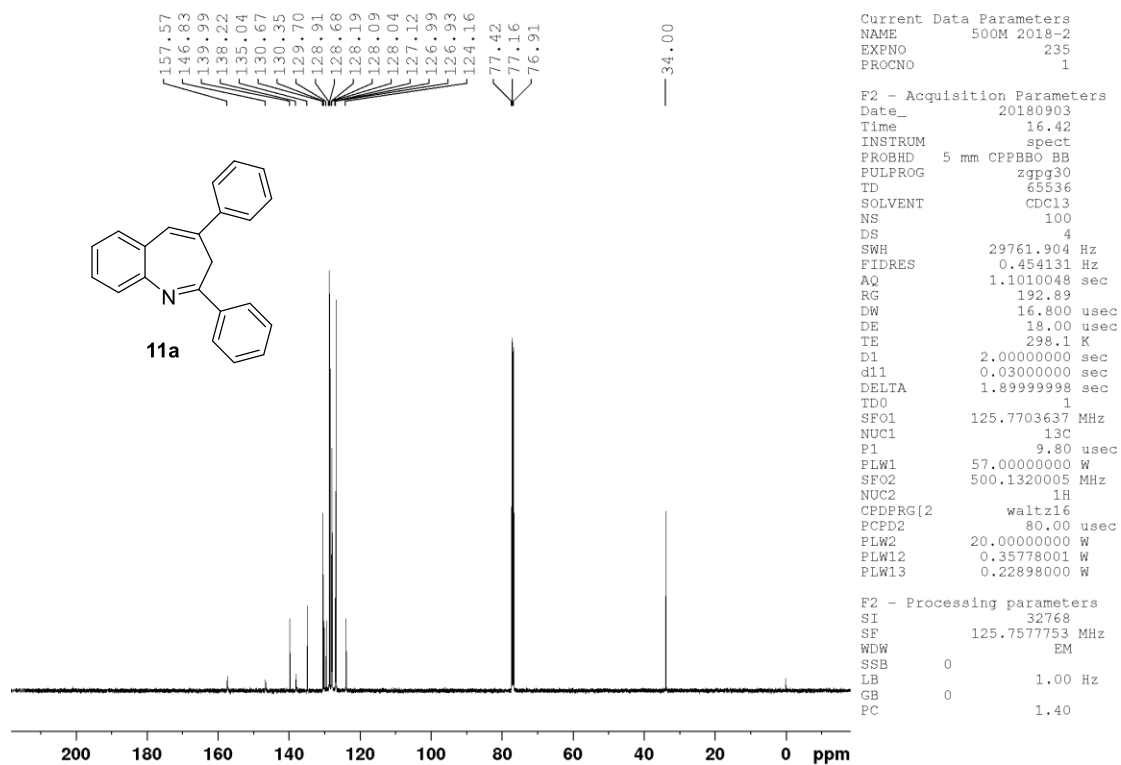

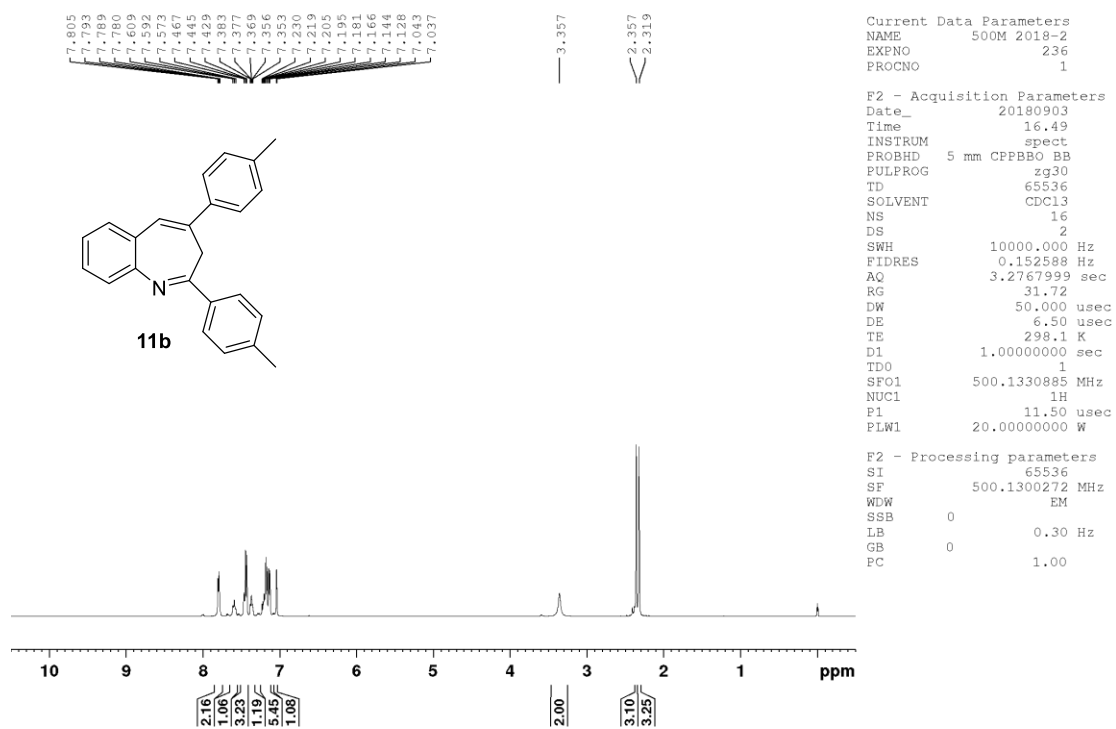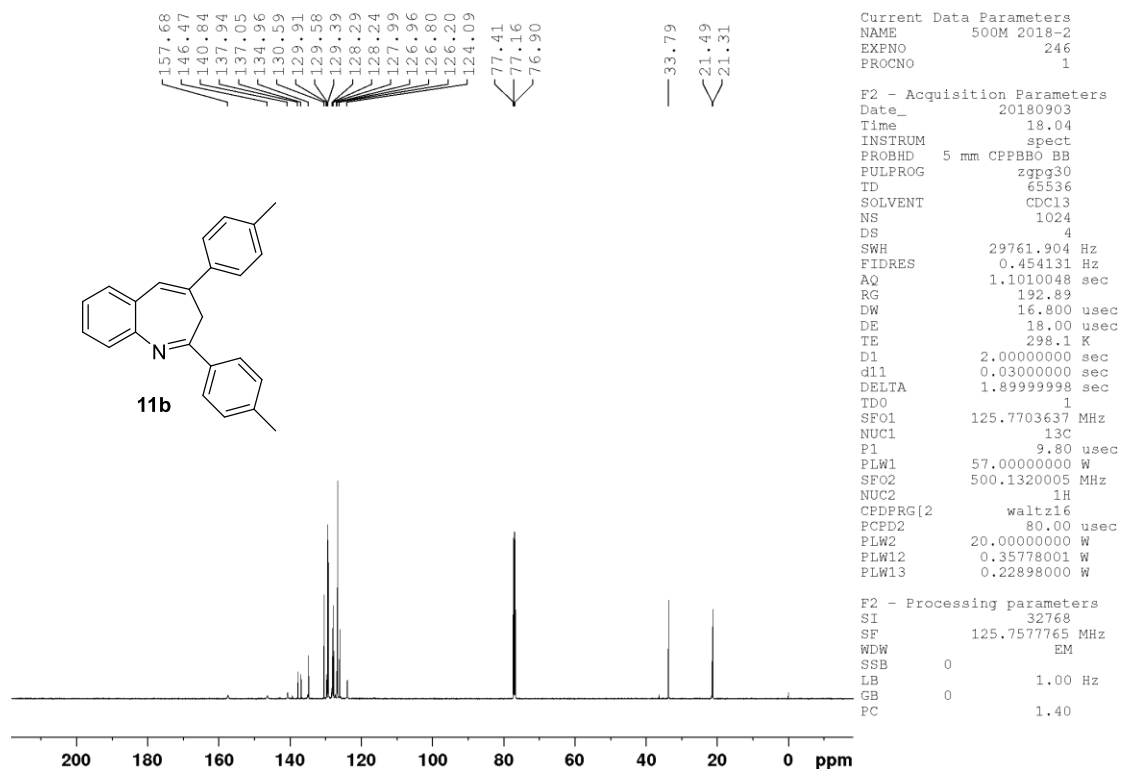

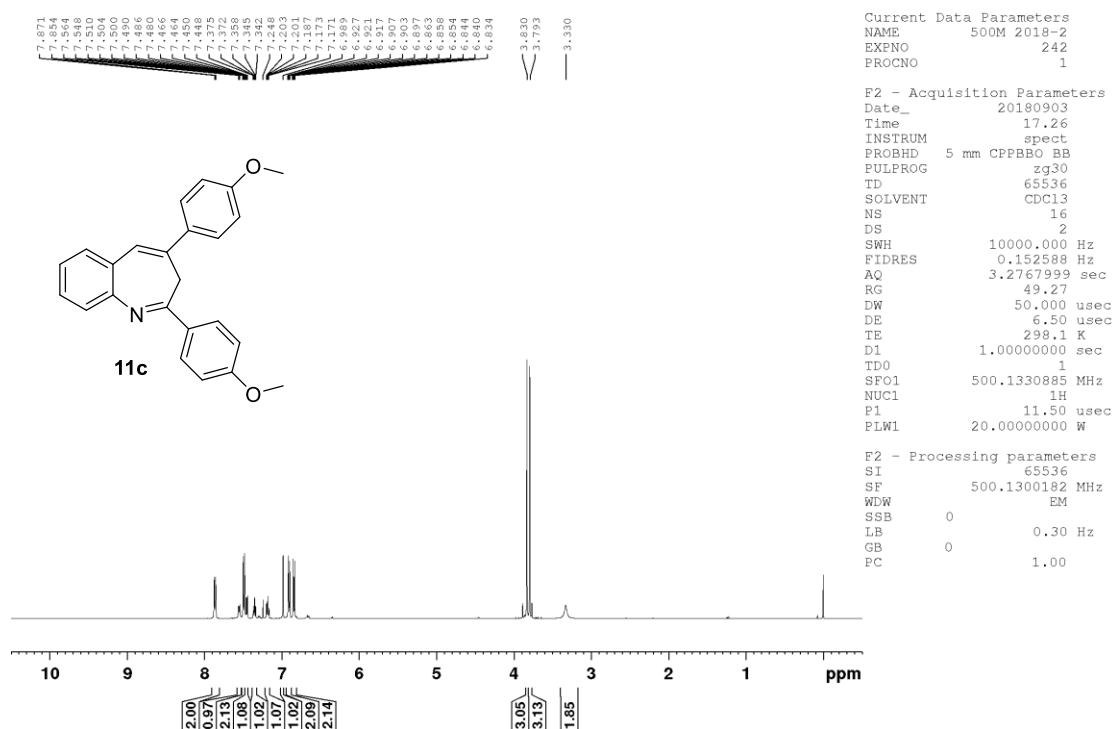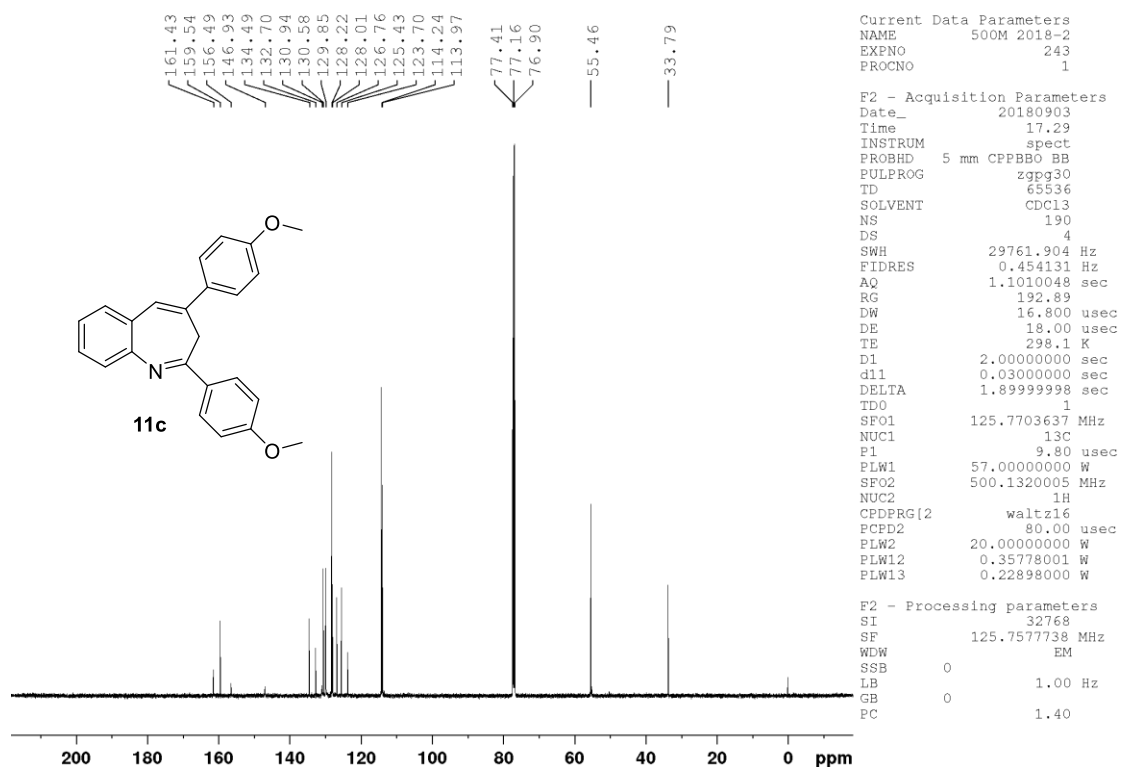

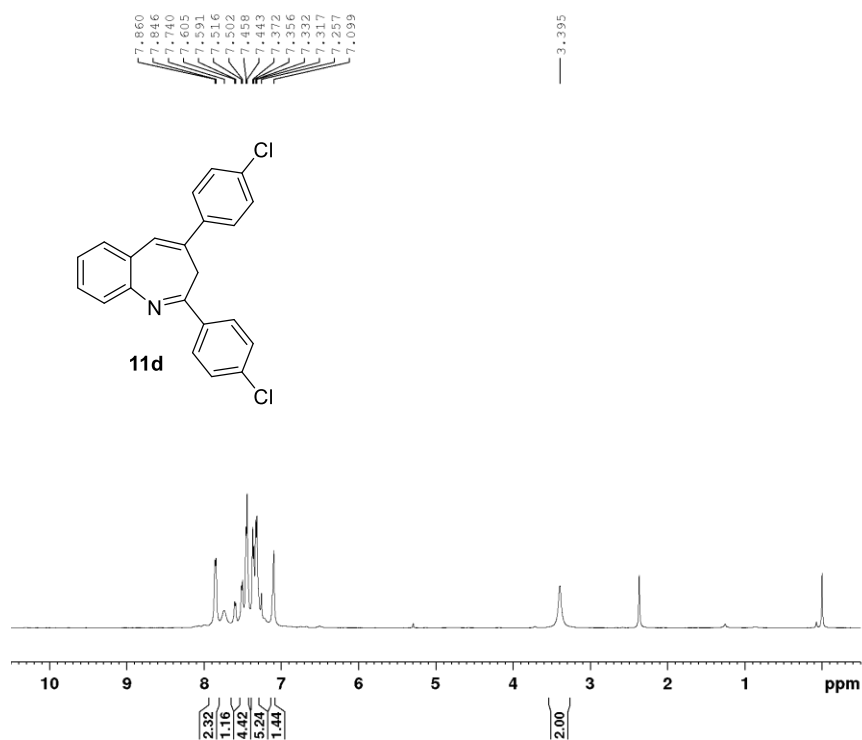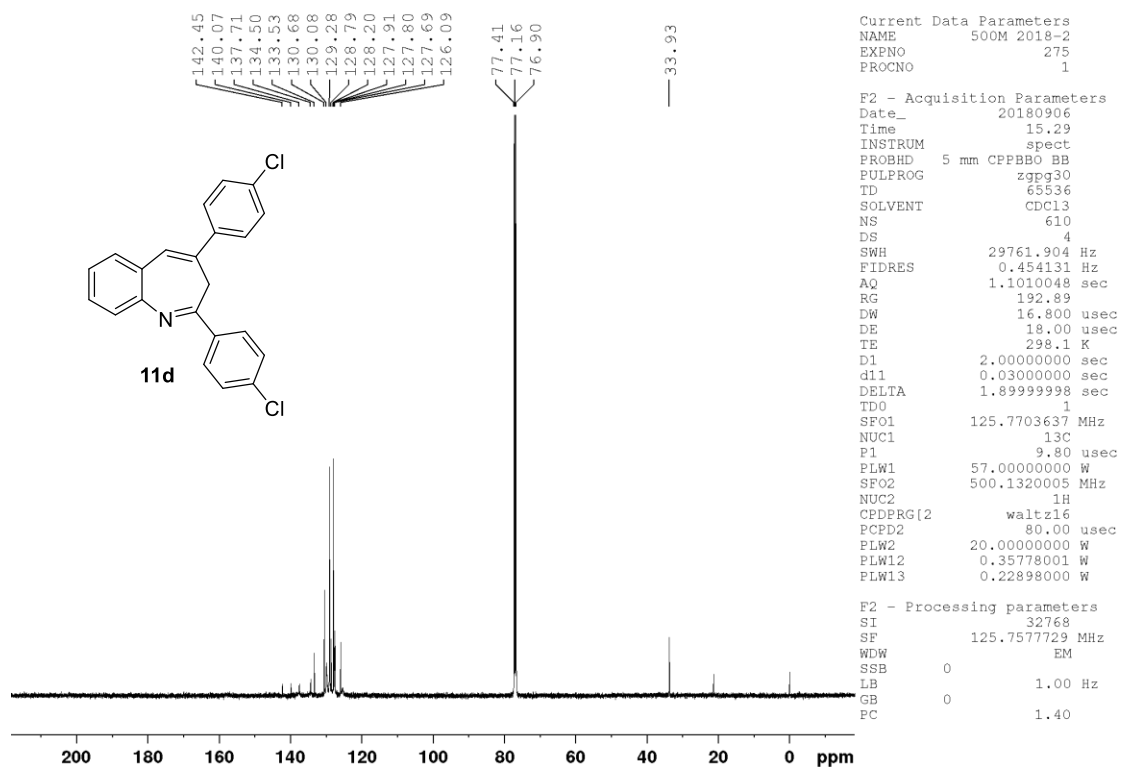

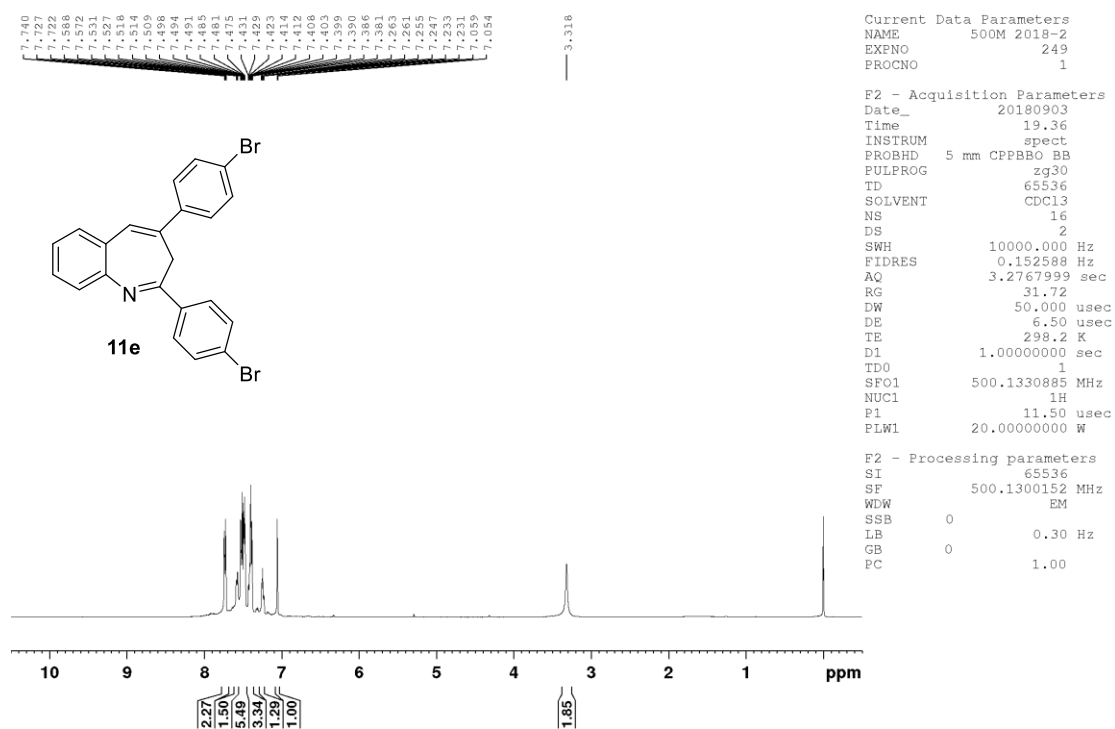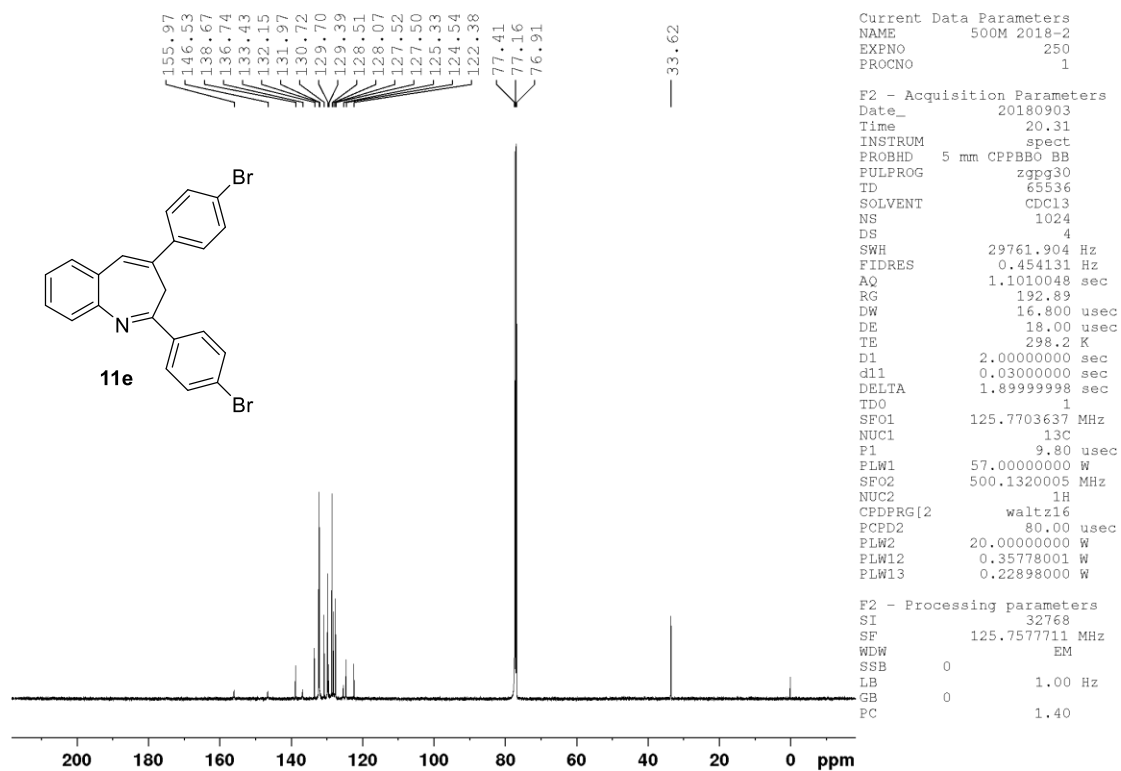



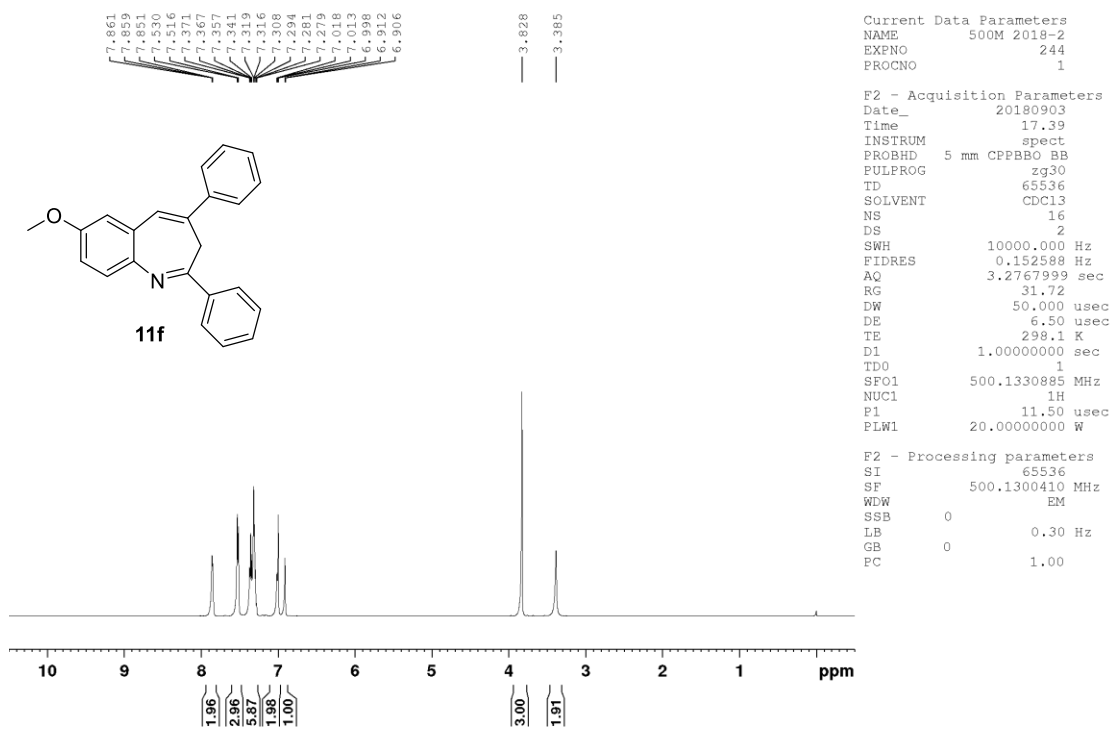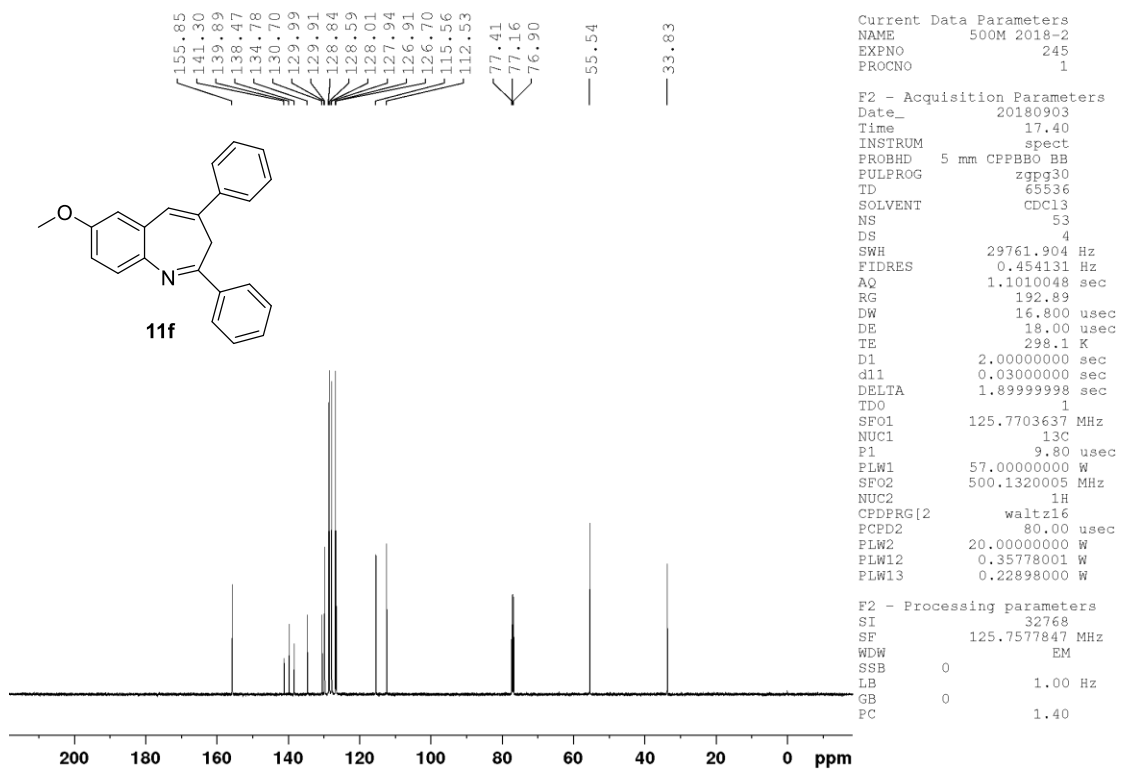

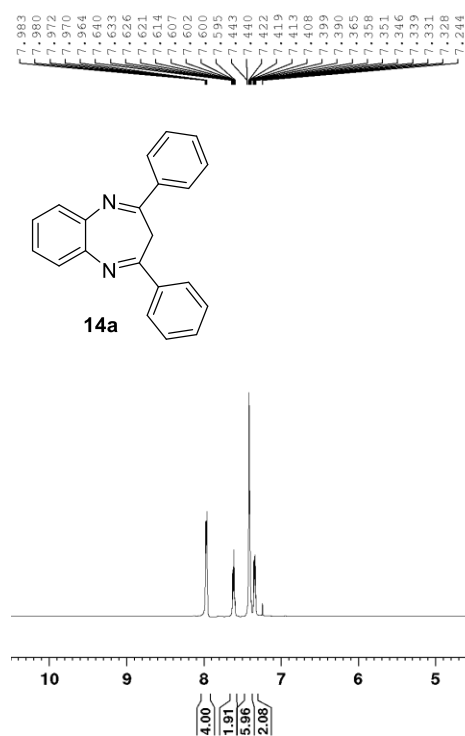

Current Data Parameters  
NAME 500M 2018-2  
EXPNO 257  
PROCNO 1

F2 - Acquisition Parameters  
Date\_ 20180904  
Time 9.58  
INSTRUM spect  
PROBHD 5 mm CFPBBO BB  
PULPROG zg30  
TD 65536  
SOLVENT CDCl3  
NS 16  
DS 2  
SWH 10000.000 Hz  
FIDRES 0.152588 Hz  
AQ 3.2767999 sec  
RG 31.72  
DW 50.000 usec  
DE 6.50 usec  
TE 298.1 K  
D1 1.00000000 sec  
TDO 1  
SFO1 500.1330885 MHz  
NUC1 1H  
P1 11.50 usec  
PLW1 20.00000000 W

F2 - Processing parameters  
SI 65536  
SF 500.1300199 MHz  
WDW EM  
SSB 0  
LB 0.30 Hz  
GB 0  
PC 1.00

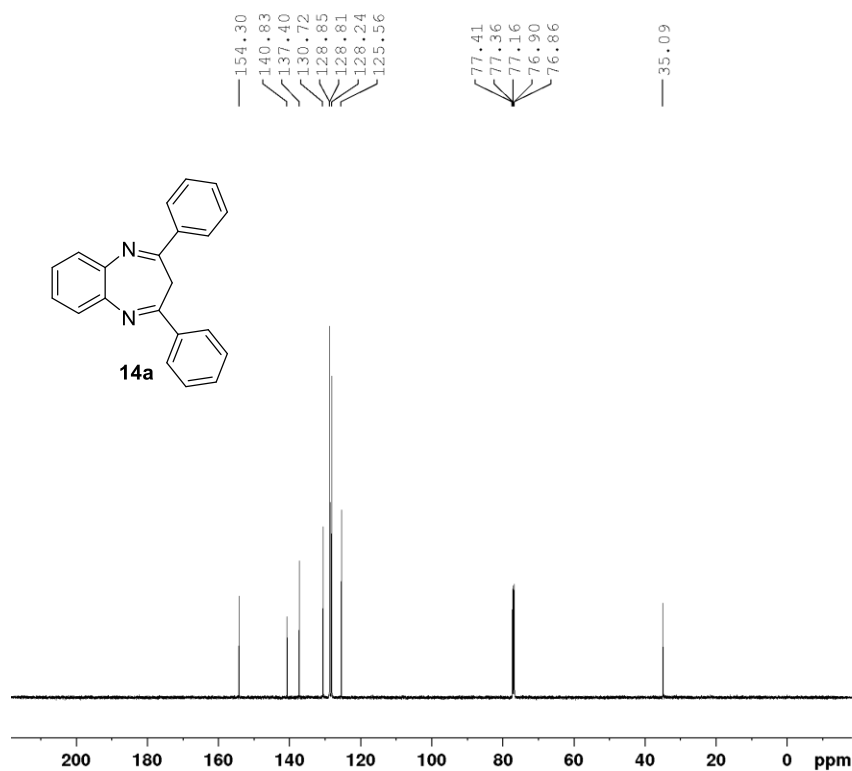

Current Data Parameters  
NAME 500M 2018-2  
EXPNO 258  
PROCNO 1

F2 - Acquisition Parameters  
Date\_ 20180904  
Time 10.00  
INSTRUM spect  
PROBHD 5 mm CFPBBO BB  
PULPROG zgpg30  
TD 65536  
SOLVENT CDCl3  
NS 37  
DS 4  
SWH 29761.904 Hz  
FIDRES 0.454131 Hz  
AQ 1.1010048 sec  
RG 192.89  
DW 16.800 usec  
DE 18.00 usec  
TE 298.1 K  
D1 2.00000000 sec  
d11 0.03000000 sec  
DELTA 1.89999998 sec  
TDO 1  
SFO1 125.7703637 MHz  
NUC1 13C  
P1 9.80 usec  
PLW1 57.00000000 W  
SFO2 500.1320005 MHz  
NUC2 1H  
CPDPRG[2] waltz16  
PCPD2 80.00 usec  
PLW2 20.00000000 W  
PLW12 0.35778001 W  
PLW13 0.22898000 W

F2 - Processing parameters  
SI 32768  
SF 125.7577820 MHz  
WDW EM  
SSB 0  
LB 1.00 Hz  
GB 0  
PC 1.40

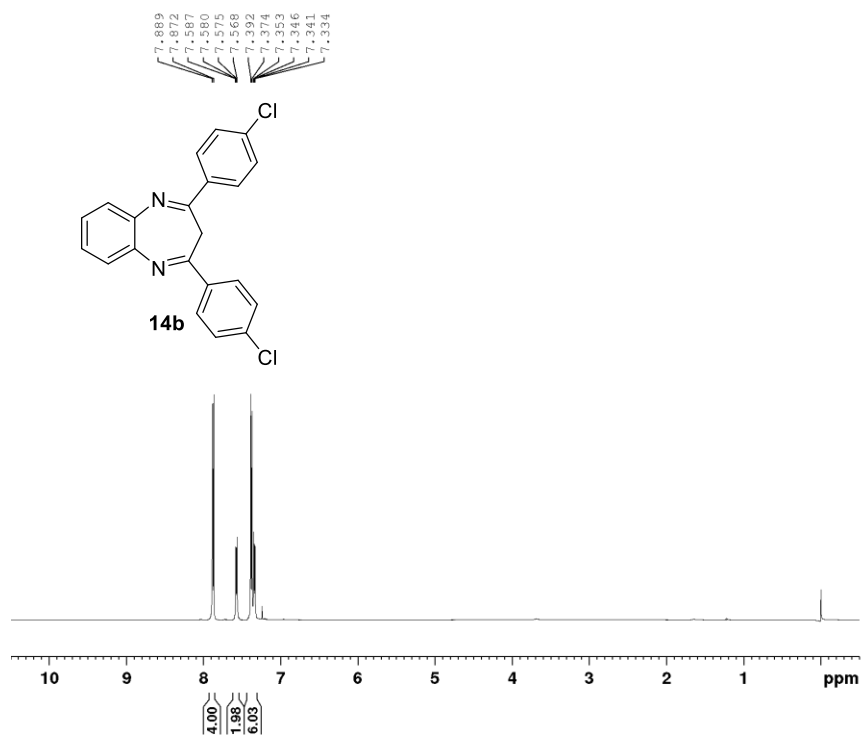

Current Data Parameters  
 NAME 500M 2018-2  
 EXPNO 259  
 PROCNO 1

F2 - Acquisition Parameters  
 Date\_ 20180904  
 Time 10.05  
 INSTRUM spect  
 PROBHD 5 mm CFPBBO BB  
 PULPROG zg30  
 TD 65536  
 SOLVENT CDCl3  
 NS 16  
 DS 2  
 SWH 10000.000 Hz  
 FIDRES 0.152588 Hz  
 AQ 3.2767999 sec  
 RG 31.72  
 DW 50.000 usec  
 DE 6.50 usec  
 TE 298.2 K  
 D1 1.00000000 sec  
 TD0 1  
 SFO1 500.1330885 MHz  
 NUC1 1H  
 P1 11.50 usec  
 PLW1 20.00000000 W

F2 - Processing parameters  
 SI 65536  
 SF 500.1300190 MHz  
 WDW EM  
 SSB 0  
 LB 0.30 Hz  
 GB 0  
 PC 1.00

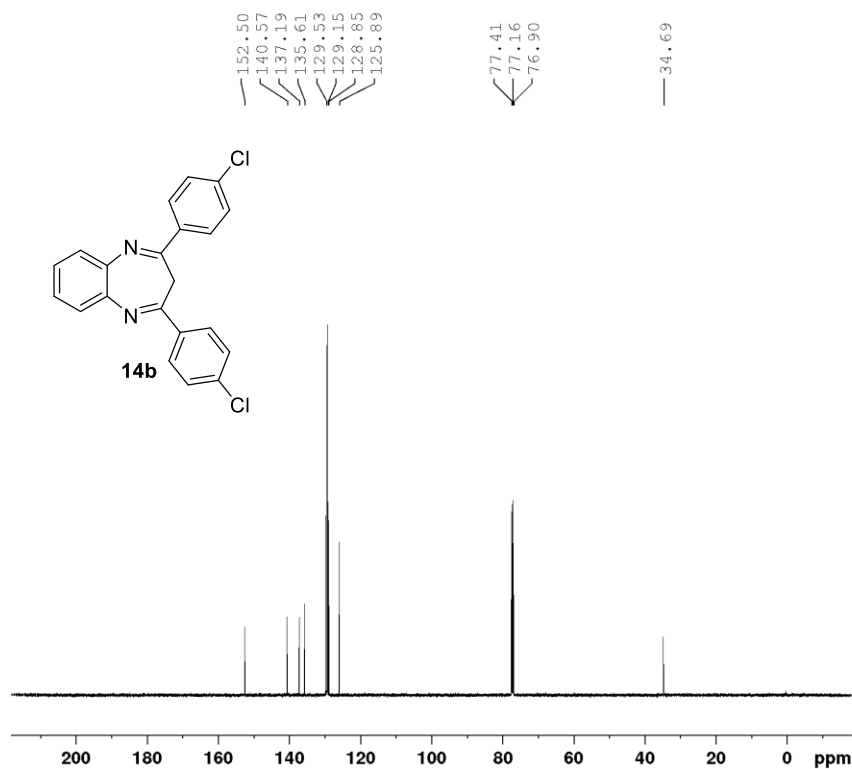

Current Data Parameters  
 NAME 500M 2018-2  
 EXPNO 260  
 PROCNO 1

F2 - Acquisition Parameters  
 Date\_ 20180904  
 Time 10.06  
 INSTRUM spect  
 PROBHD 5 mm CFPBBO BB  
 PULPROG zgpg30  
 TD 65536  
 SOLVENT CDCl3  
 NS 20  
 DS 4  
 SWH 29761.904 Hz  
 FIDRES 0.454131 Hz  
 AQ 1.1010048 sec  
 RG 192.89  
 DW 16.800 usec  
 DE 18.00 usec  
 TE 298.1 K  
 D1 2.00000000 sec  
 d11 0.03000000 sec  
 DELTA 1.89999998 sec  
 TD0 1  
 SFO1 125.7703637 MHz  
 NUC1 13C  
 P1 9.80 usec  
 PLW1 57.00000000 W  
 SFO2 500.1320005 MHz  
 NUC2 1H  
 CPDPRG2 waltz16  
 PCPD2 80.00 usec  
 PLW2 20.00000000 W  
 PLW12 0.35778001 W  
 PLW13 0.22898000 W

F2 - Processing parameters  
 SI 32768  
 SF 125.757765 MHz  
 WDW EM  
 SSB 0  
 LB 1.00 Hz  
 GB 0  
 PC 1.40

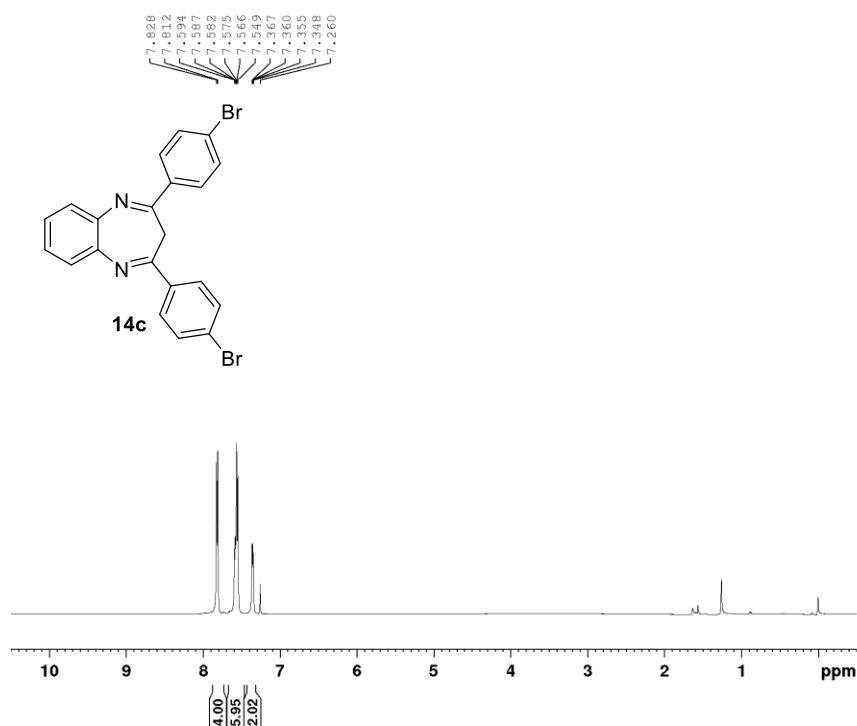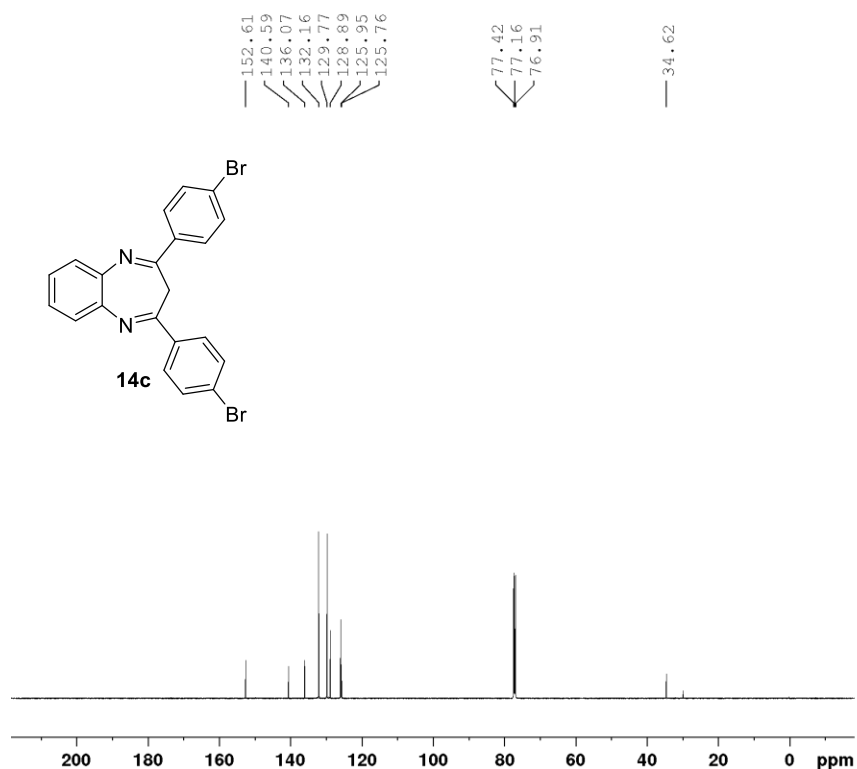

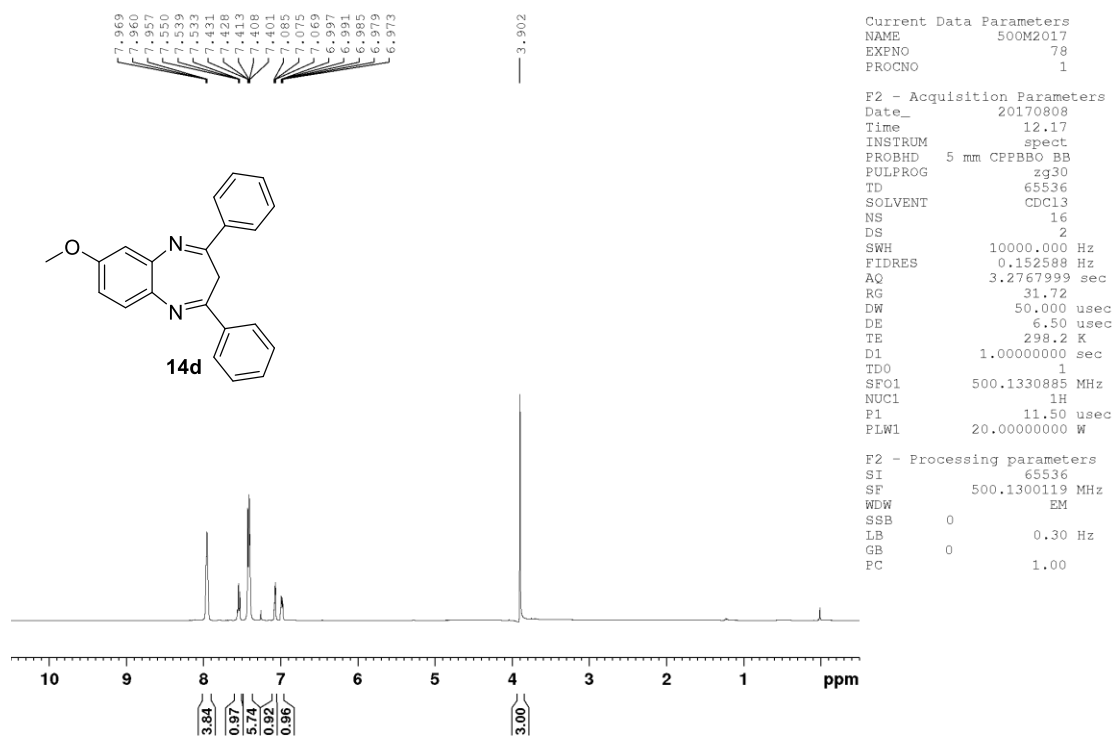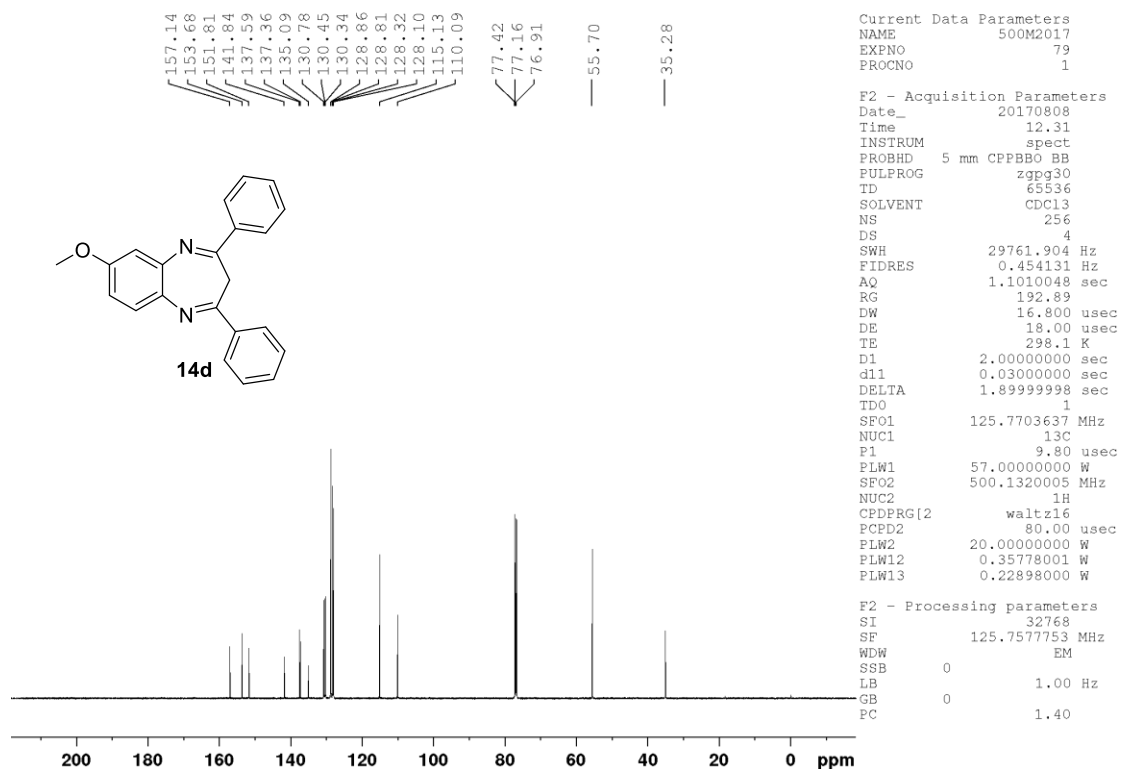

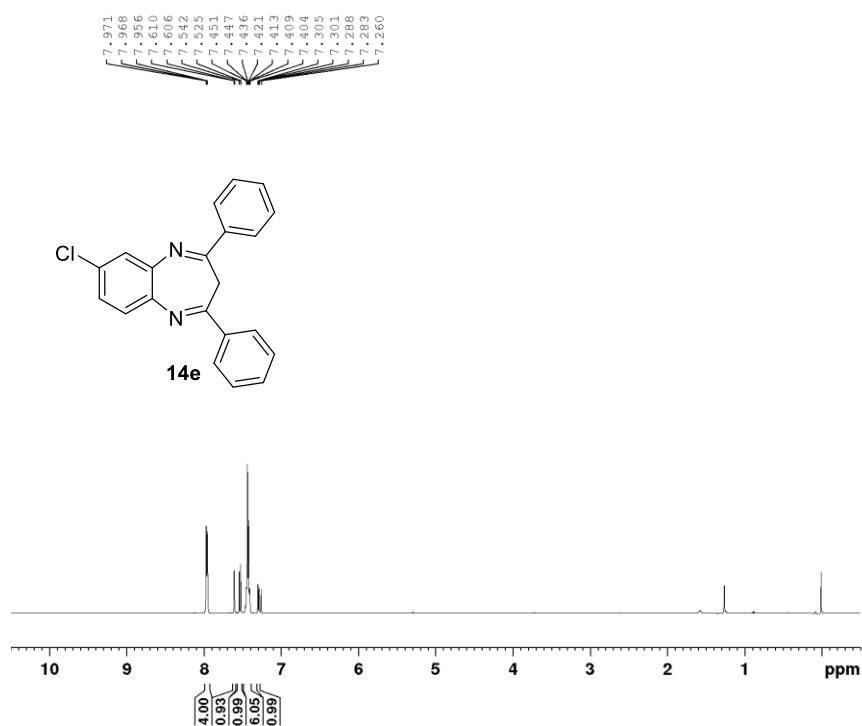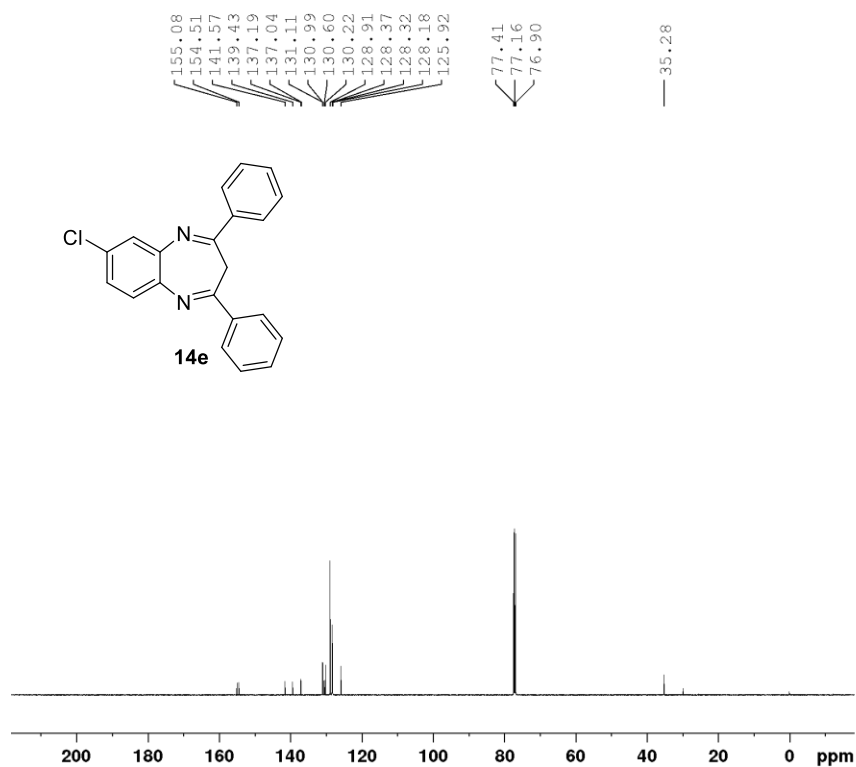

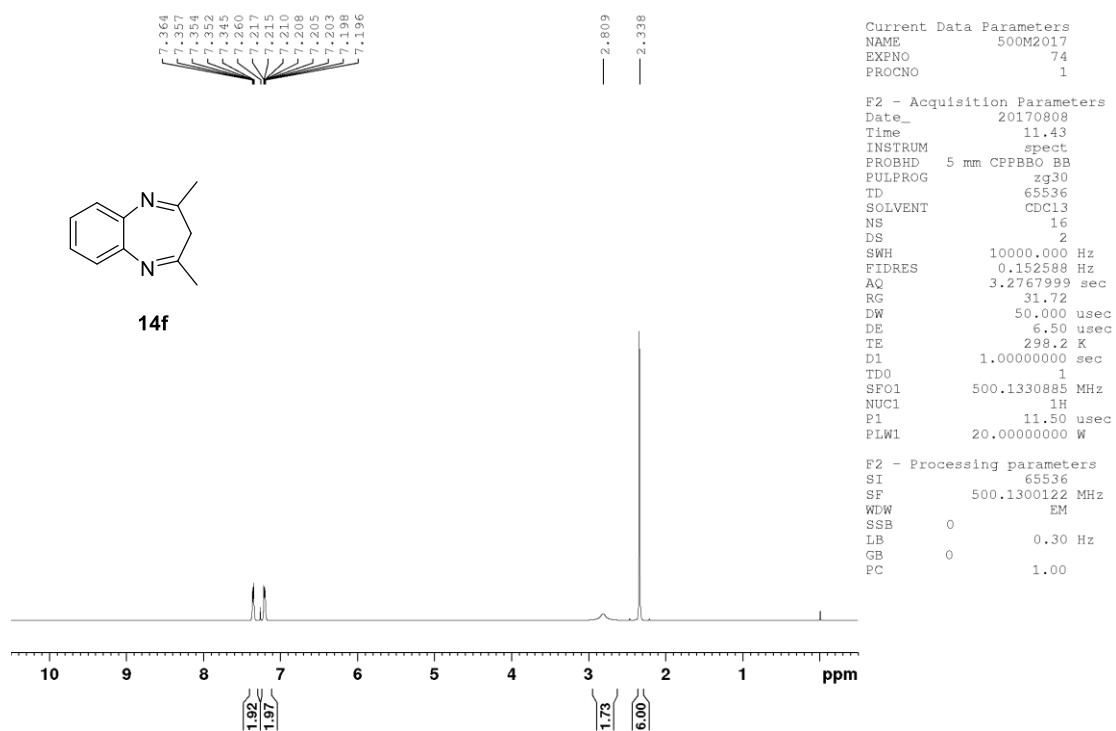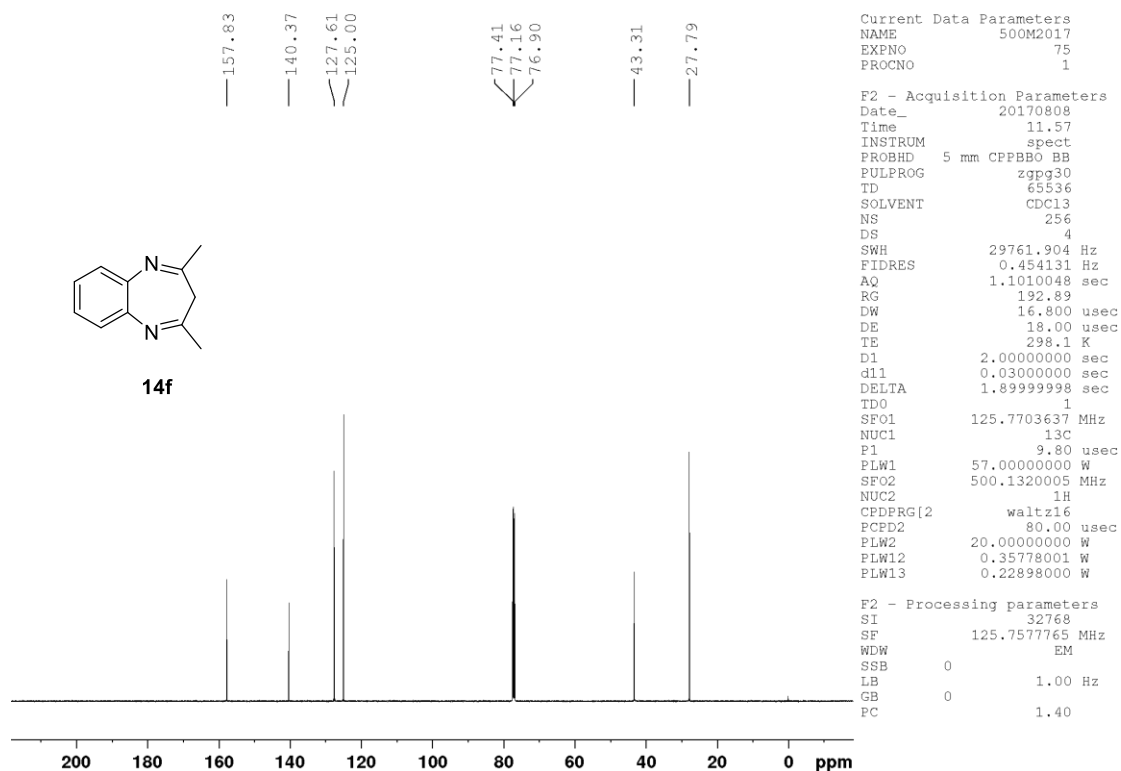

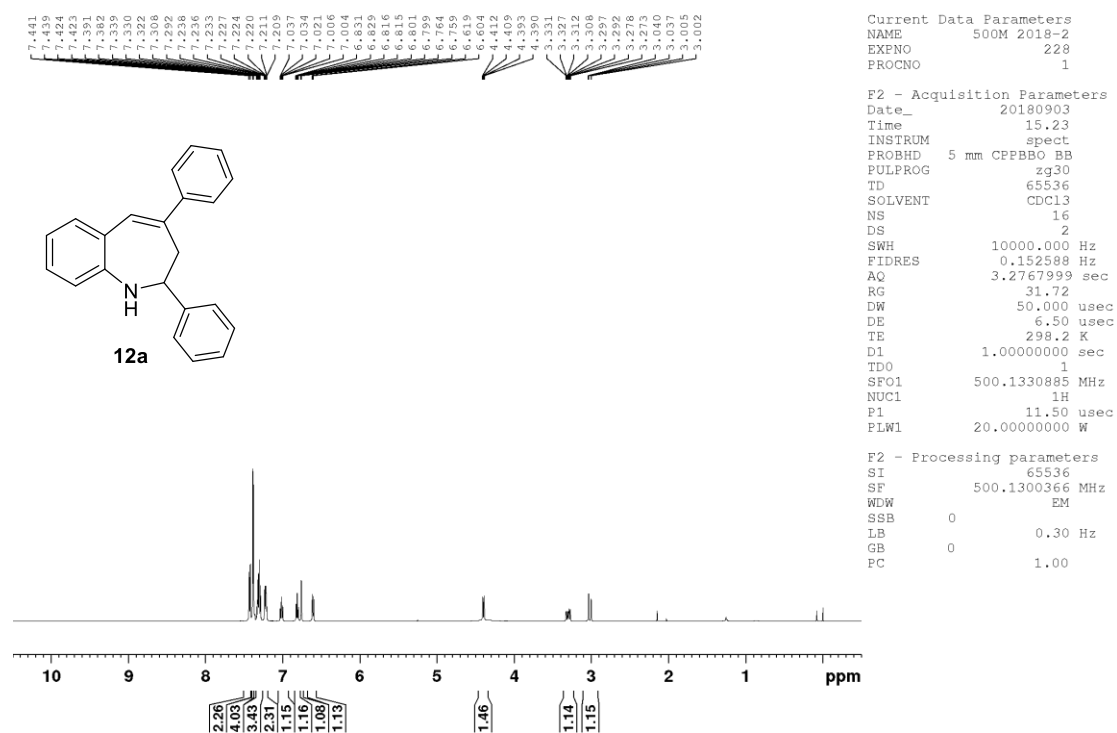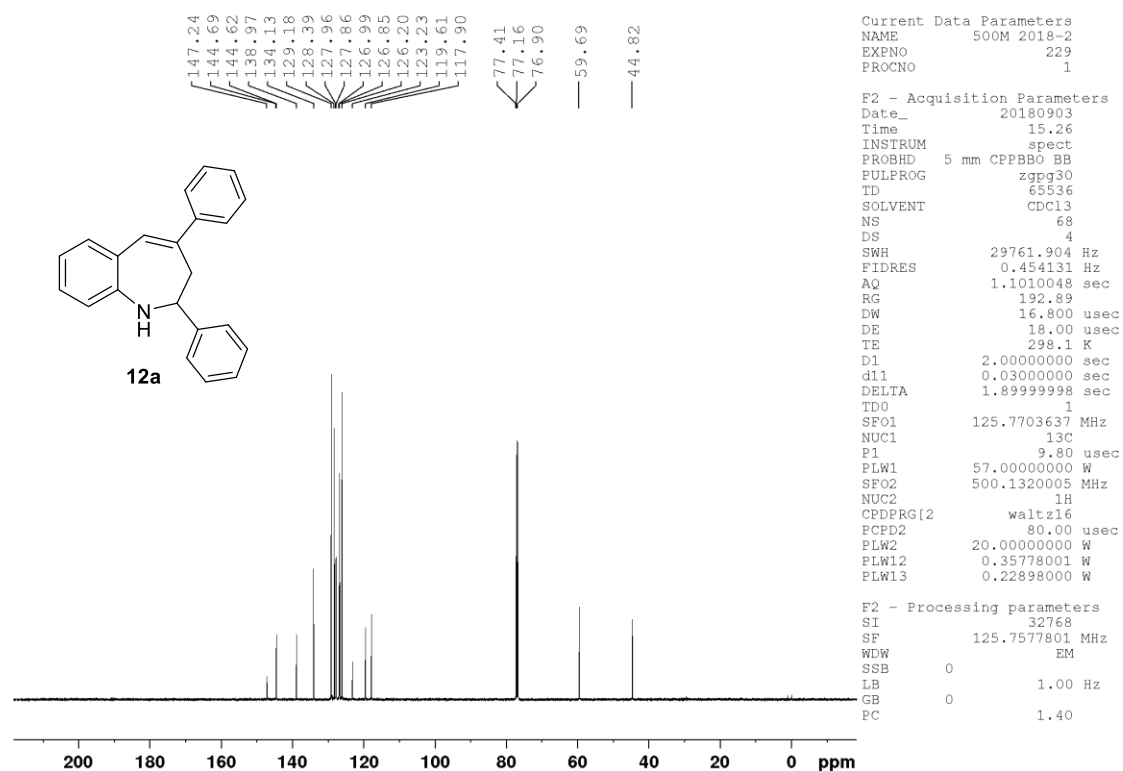



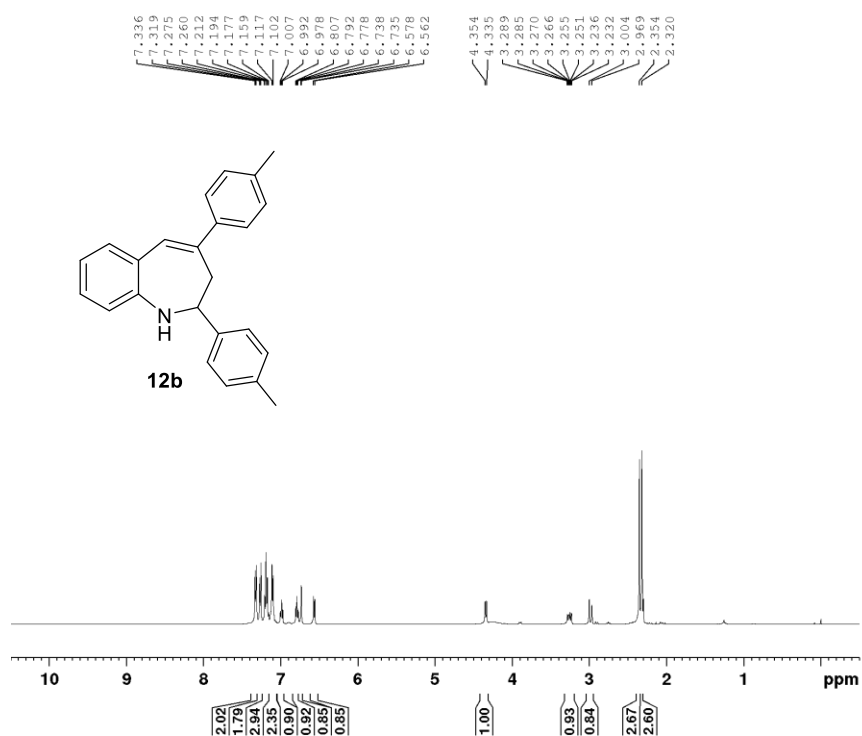

Current Data Parameters  
NAME 500M 2018-2  
EXPNO 204  
PROCNO 1

F2 - Acquisition Parameters  
Date\_ 20180827  
Time 20.30  
INSTRUM spect  
PROBHD 5 mm CFPBBO BB  
PULPROG zg30  
TD 65536  
SOLVENT CDCl3  
NS 16  
DS 2  
SWH 10000.000 Hz  
FIDRES 0.152588 Hz  
AQ 3.2767999 sec  
RG 25.06  
DW 50.000 usec  
DE 6.50 usec  
TE 298.1 K  
D1 1.00000000 sec  
TD0 1  
SFO1 500.1330885 MHz  
NUC1 1H  
P1 11.50 usec  
PLW1 20.00000000 W

F2 - Processing parameters  
SI 65536  
SF 500.1300549 MHz  
WDW EM  
SSB 0  
LB 0.30 Hz  
GB 0  
PC 1.00

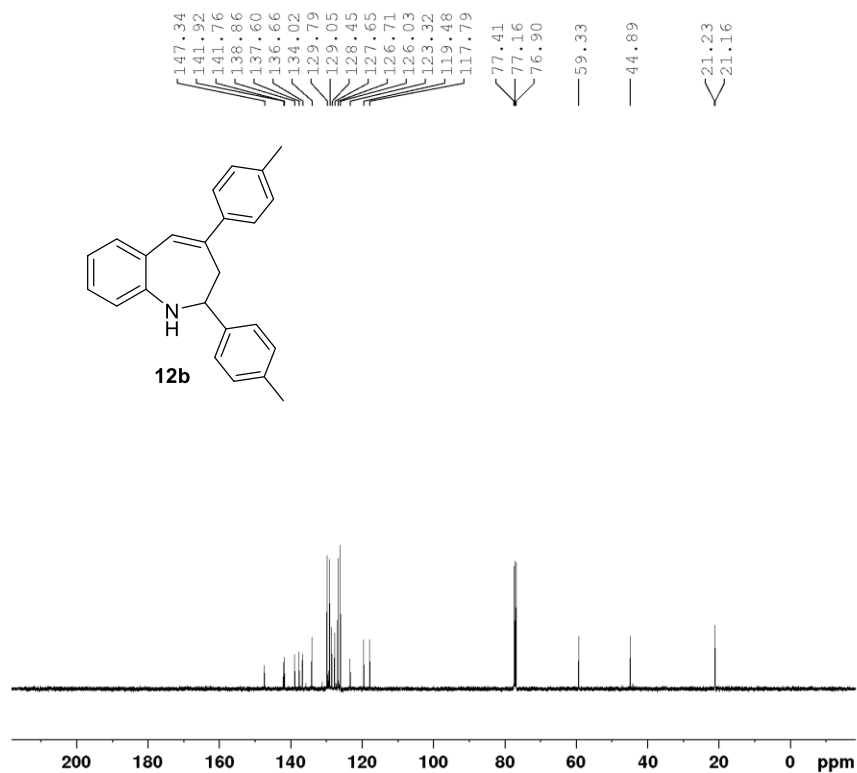

Current Data Parameters  
NAME 500M 2018-2  
EXPNO 209  
PROCNO 1

F2 - Acquisition Parameters  
Date\_ 20180827  
Time 20.44  
INSTRUM spect  
PROBHD 5 mm CFPBBO BB  
PULPROG zgpg30  
TD 65536  
SOLVENT CDCl3  
NS 5  
DS 4  
SWH 29761.904 Hz  
FIDRES 0.454131 Hz  
AQ 1.1010048 sec  
RG 192.89  
DW 16.800 usec  
DE 18.00 usec  
TE 298.1 K  
D1 2.00000000 sec  
d11 0.03000000 sec  
DELTA 1.89999998 sec  
TD0 1  
SFO1 125.7703637 MHz  
NUC1 13C  
P1 9.80 usec  
PLW1 57.00000000 W  
SFO2 500.1320005 MHz  
NUC2 1H  
CPDPRG2 waltz16  
PCPD2 80.00 usec  
PLW2 20.00000000 W  
PLW12 0.35778001 W  
PLW13 0.22898000 W

F2 - Processing parameters  
SI 32768  
SF 125.7577865 MHz  
WDW EM  
SSB 0  
LB 1.00 Hz  
GB 0  
PC 1.40

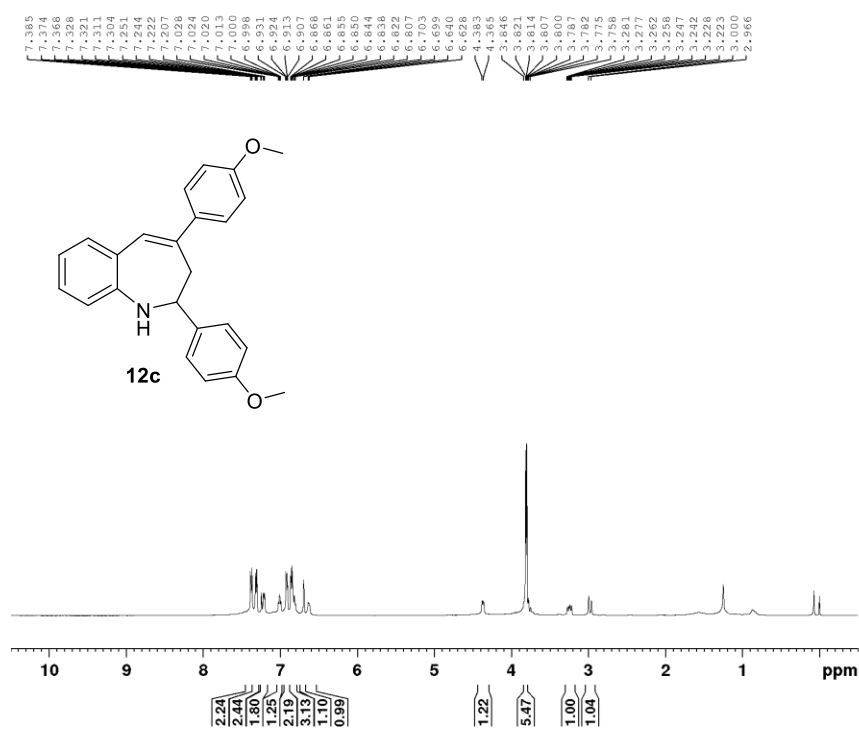

Current Data Parameters  
NAME 500M 2018-2  
EXPNO 263  
PROCNO 1

F2 - Acquisition Parameters  
Date\_ 20180904  
Time 11.11  
INSTRUM spect  
PROBHD 5 mm CFPBBO BB  
PULPROG zg30  
TD 65536  
SOLVENT CDCl3  
NS 16  
DS 2  
SWH 10000.000 Hz  
FIDRES 0.152588 Hz  
AQ 3.2767999 sec  
RG 31.72  
DW 50.000 usec  
DE 6.50 usec  
TE 298.2 K  
D1 1.00000000 sec  
TDO 1  
SFO1 500.130885 MHz  
NUC1 1H  
P1 11.50 usec  
PLW1 20.00000000 W

F2 - Processing parameters  
SI 65536  
SF 500.1300186 MHz  
WDW EM  
SSB 0  
LB 0.30 Hz  
GB 0  
PC 1.00

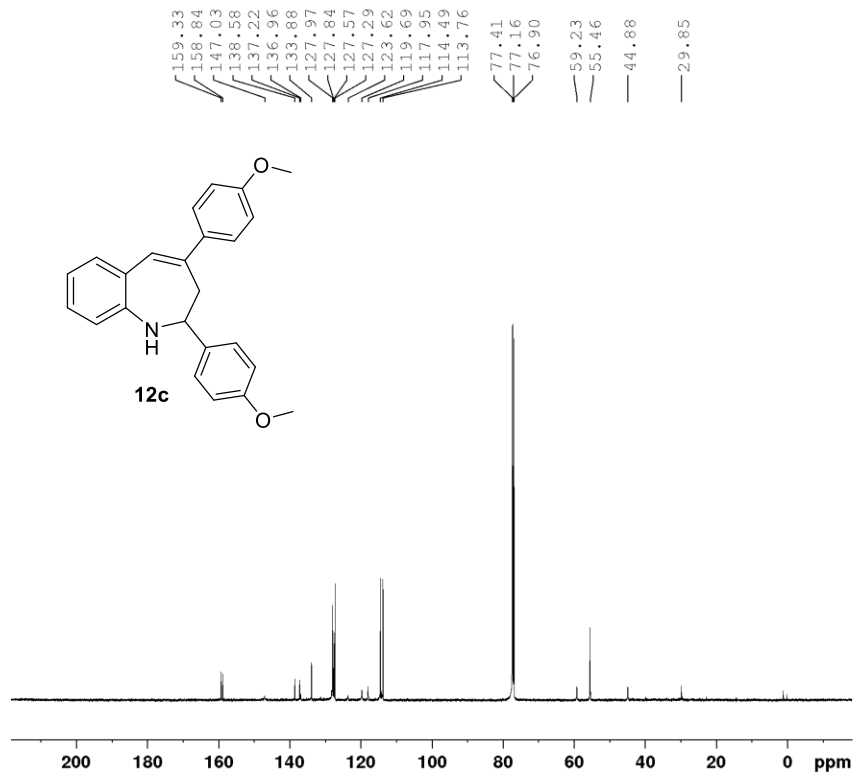

Current Data Parameters  
NAME 500M 2018-2  
EXPNO 265  
PROCNO 1

F2 - Acquisition Parameters  
Date\_ 20180904  
Time 11.25  
INSTRUM spect  
PROBHD 5 mm CFPBBO BB  
PULPROG zgpg30  
TD 65536  
SOLVENT CDCl3  
NS 1024  
DS 4  
SWH 29761.904 Hz  
FIDRES 0.454131 Hz  
AQ 1.1010048 sec  
RG 192.89  
DW 16.800 usec  
DE 18.00 usec  
TE 298.1 K  
D1 2.00000000 sec  
d11 0.03000000 sec  
DELTA 1.89999999 sec  
TDO 1  
SFO1 125.7703637 MHz  
NUC1 13C  
P1 9.80 usec  
PLW1 57.00000000 W  
SFO2 500.1320005 MHz  
NUC2 1H  
CPDPRG2 waltz16  
PCPD2 80.00 usec  
PLW2 20.00000000 W  
PLW12 0.35778001 W  
PLW13 0.22898000 W

F2 - Processing parameters  
SI 32768  
SF 125.7577729 MHz  
WDW EM  
SSB 0  
LB 1.00 Hz  
GB 0  
PC 1.40

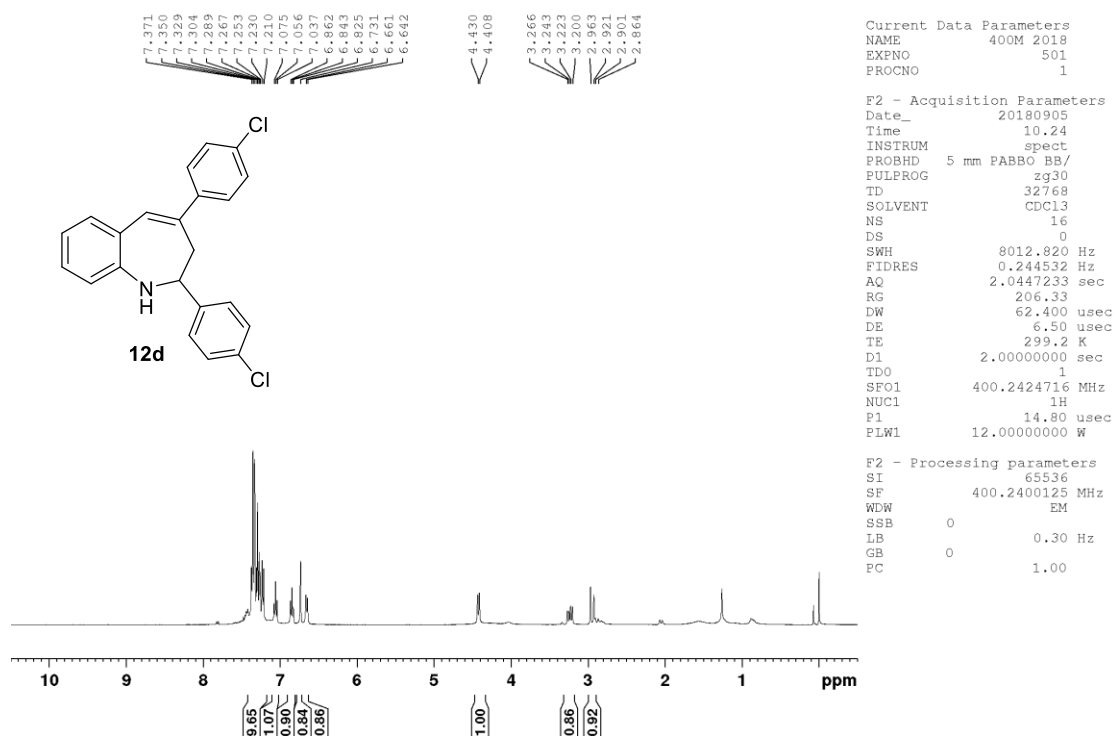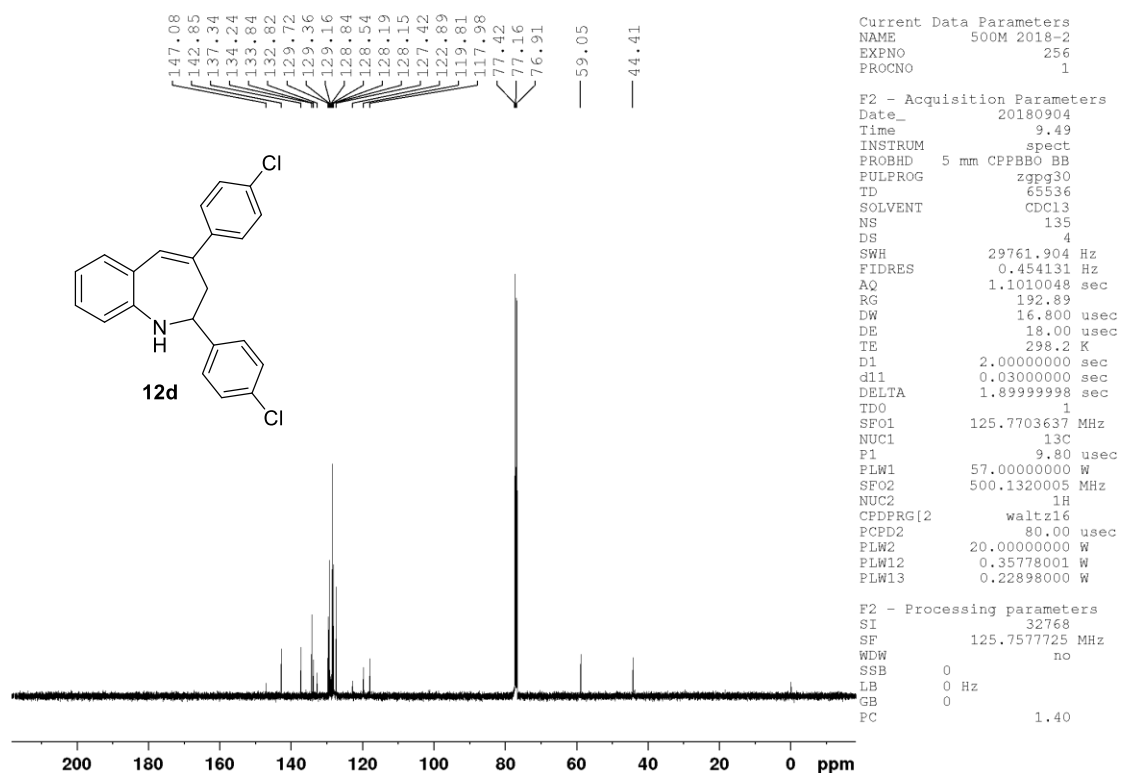

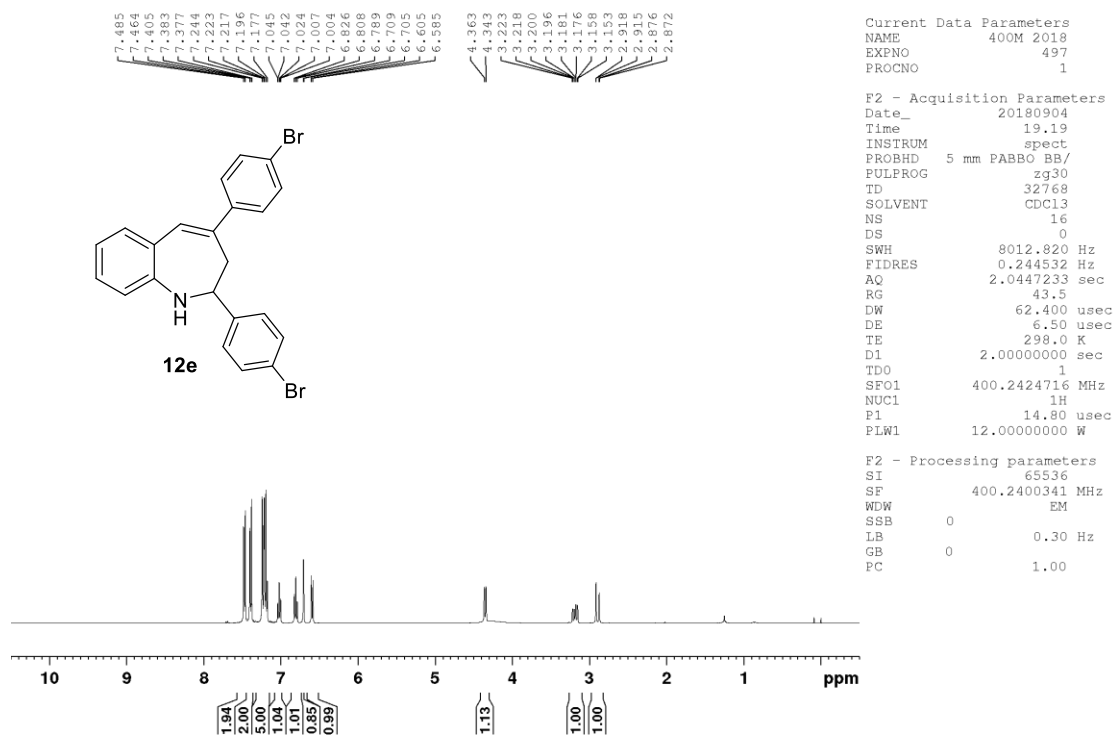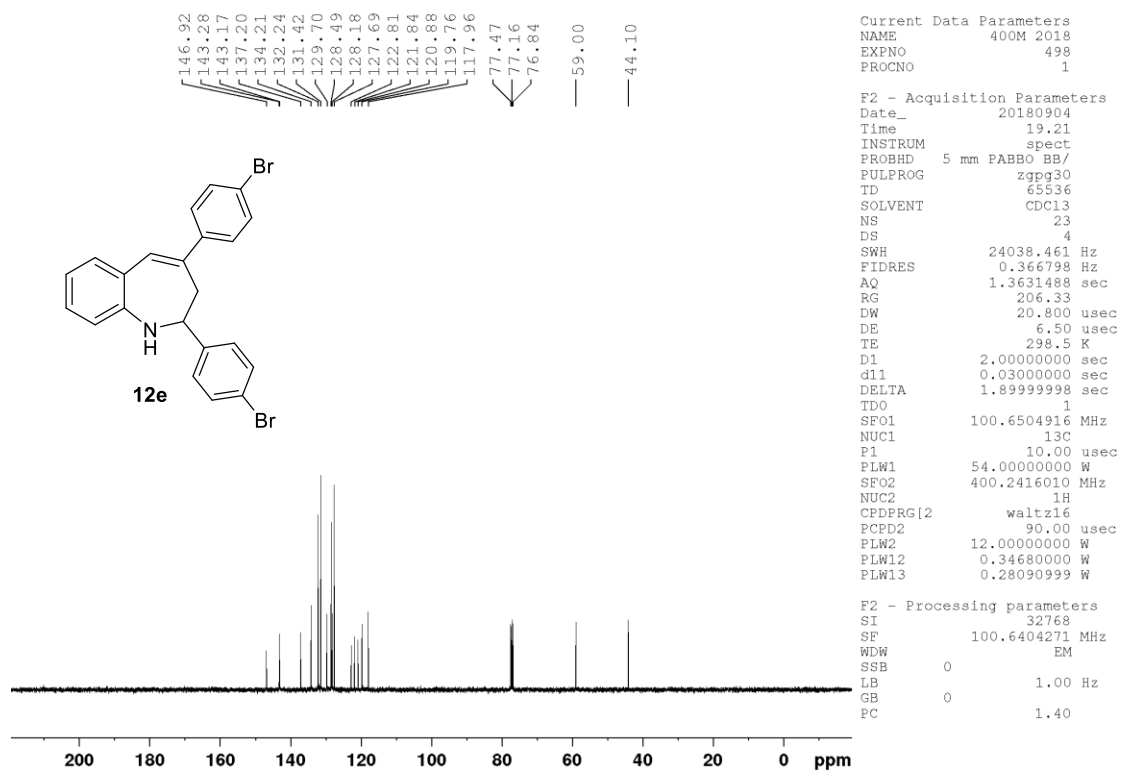

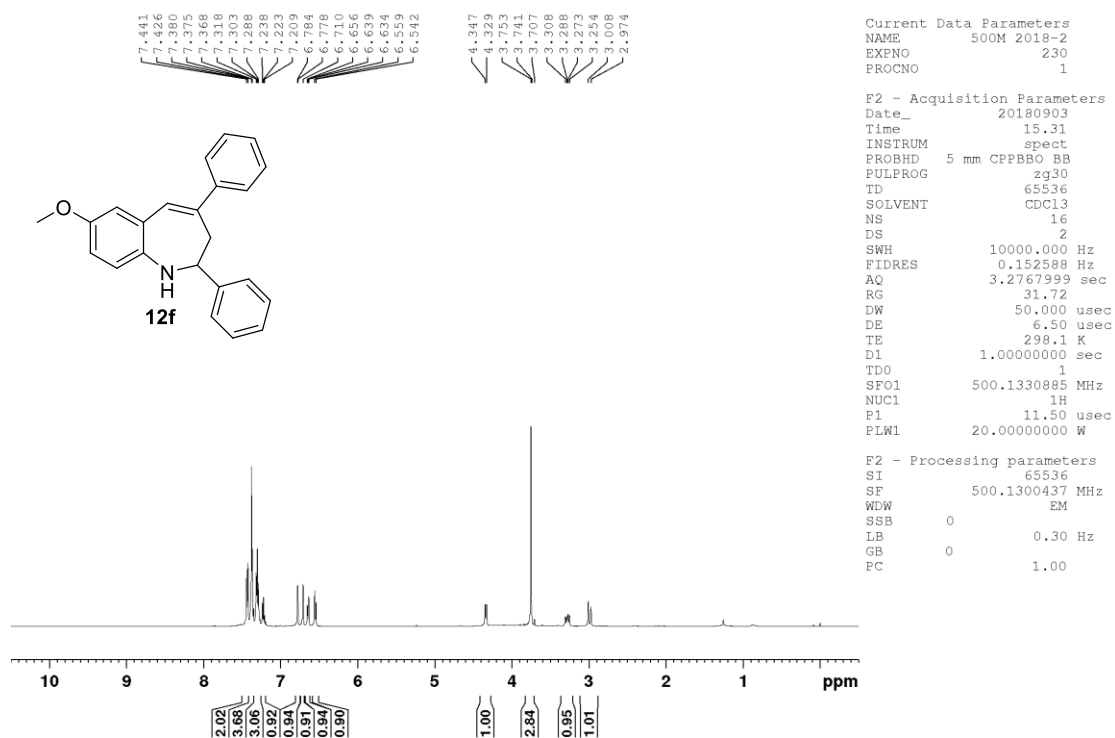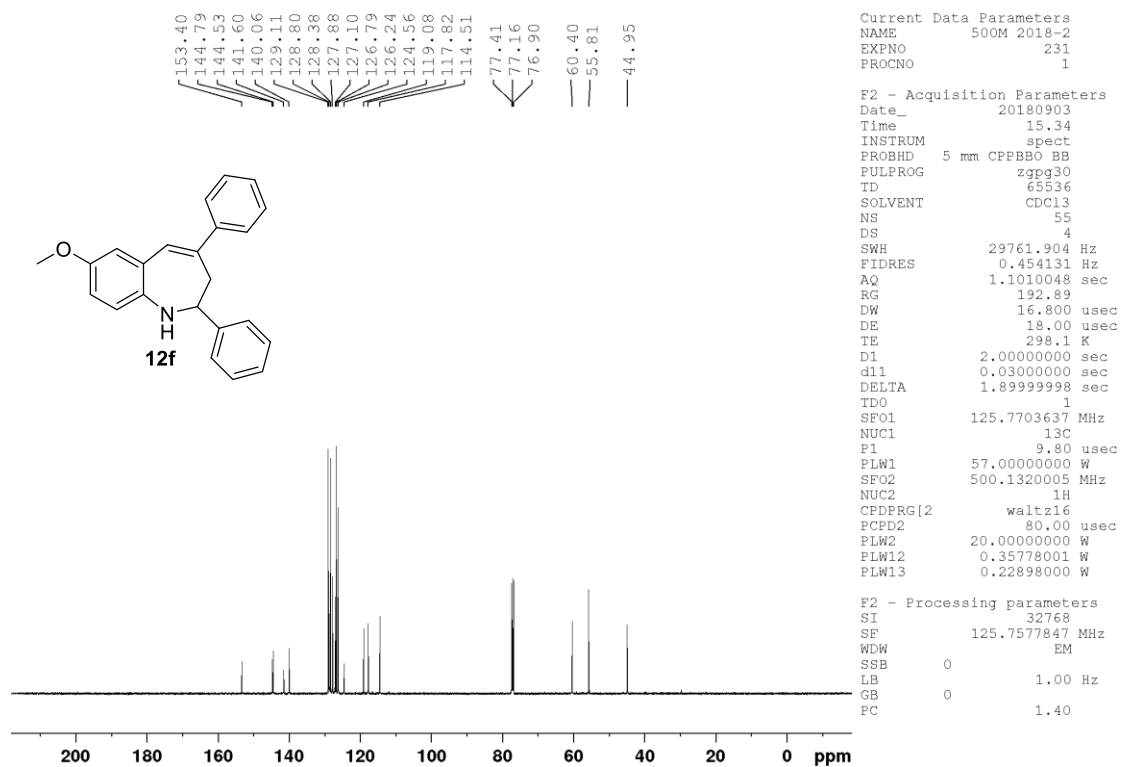

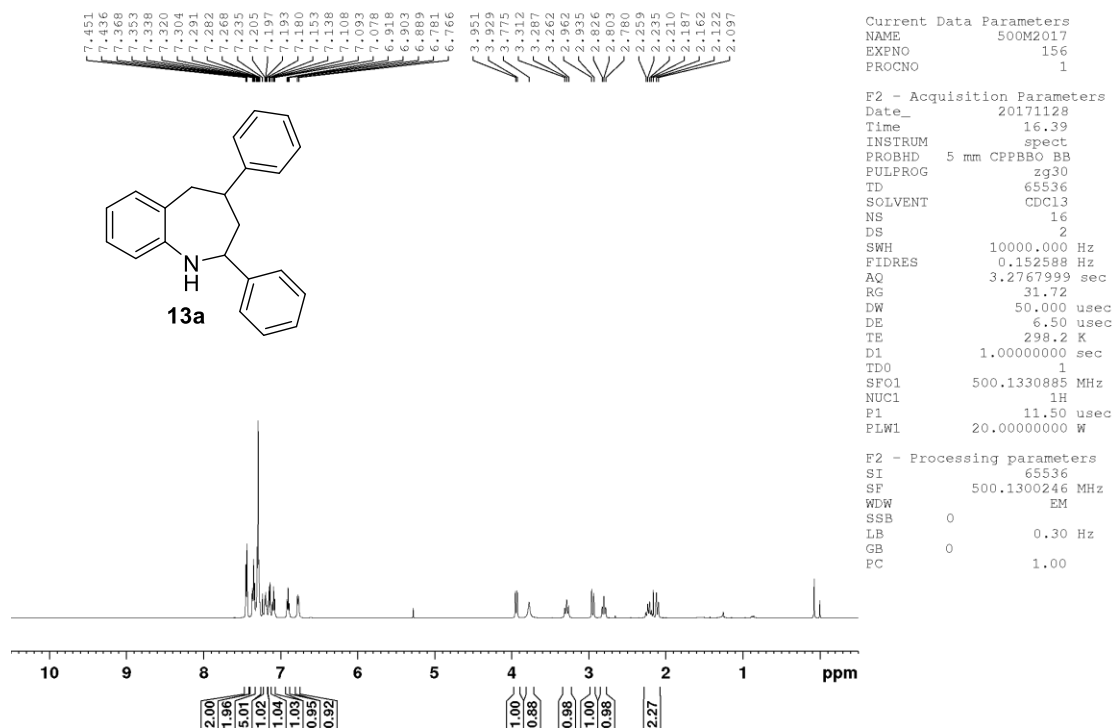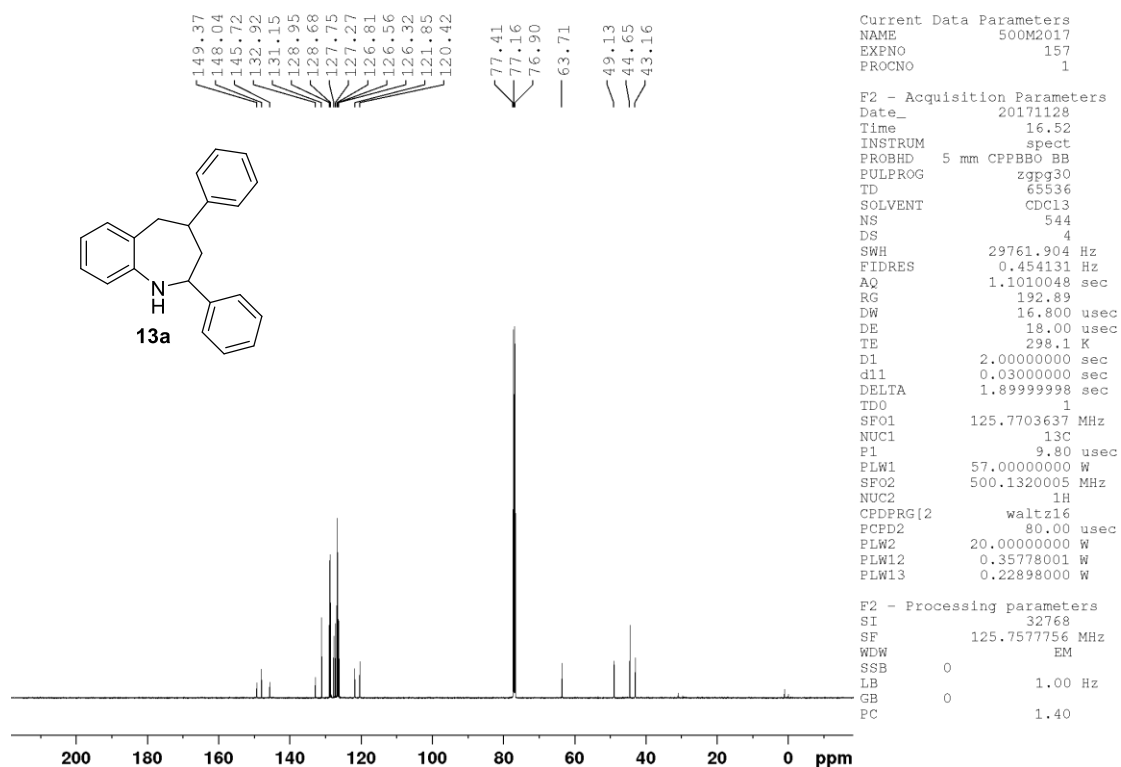

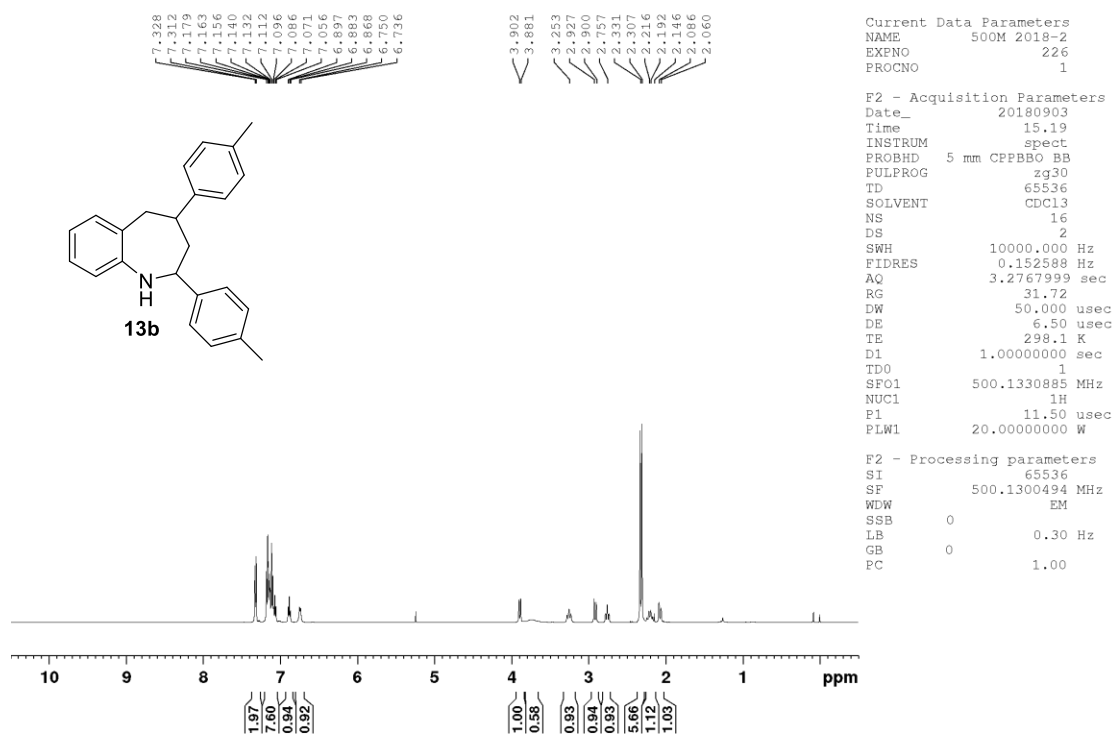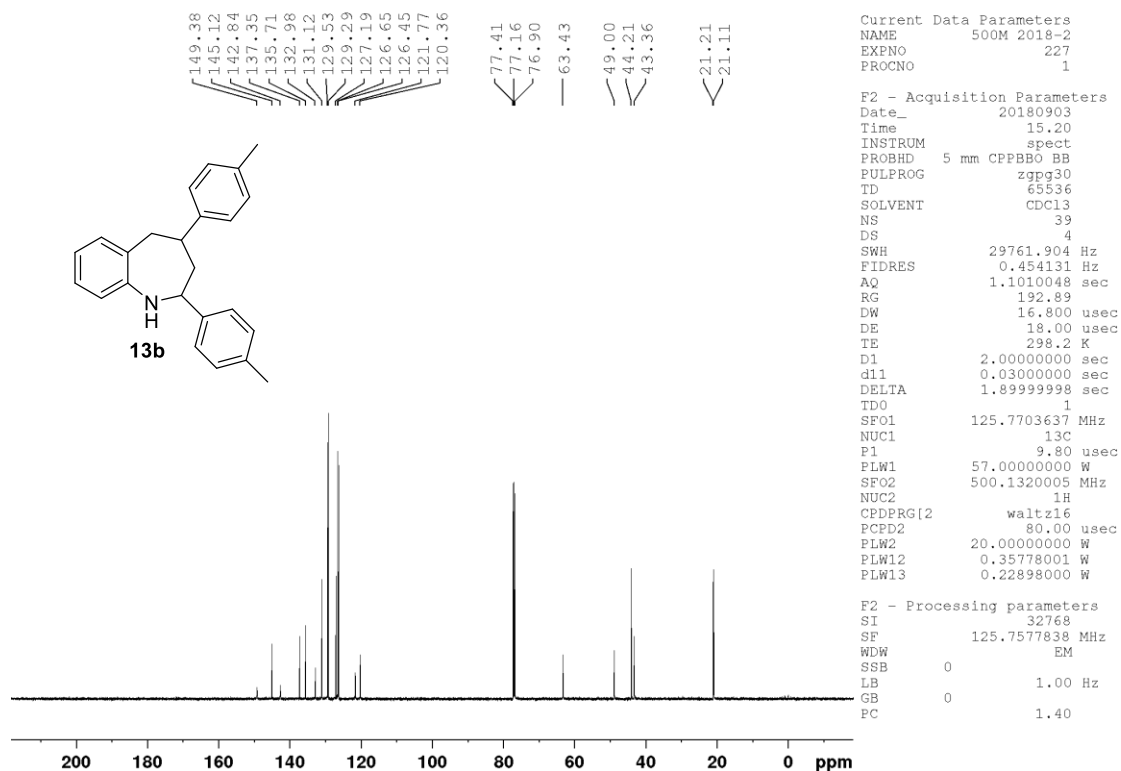

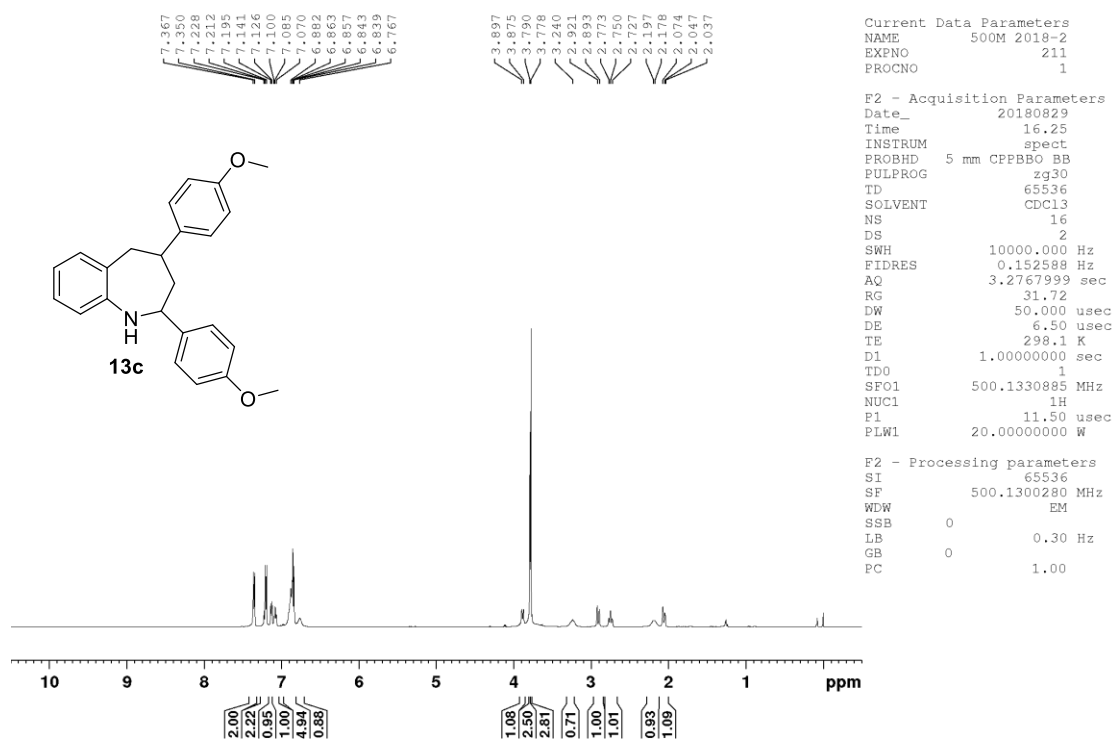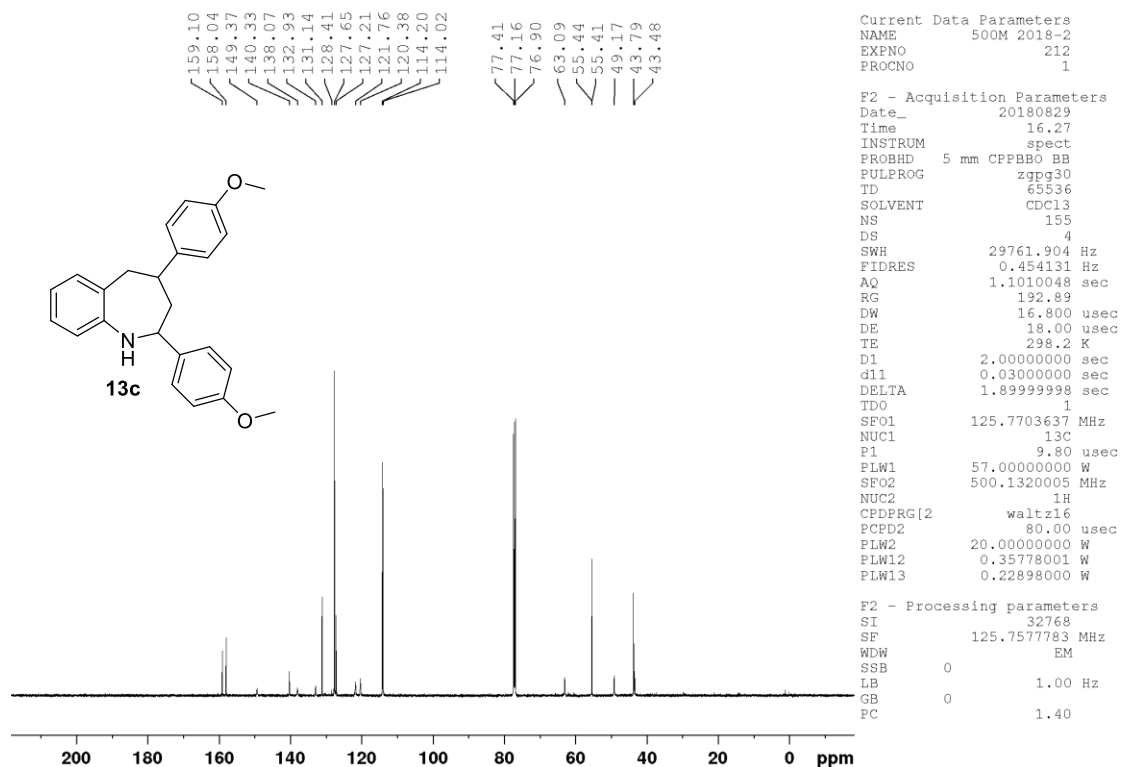



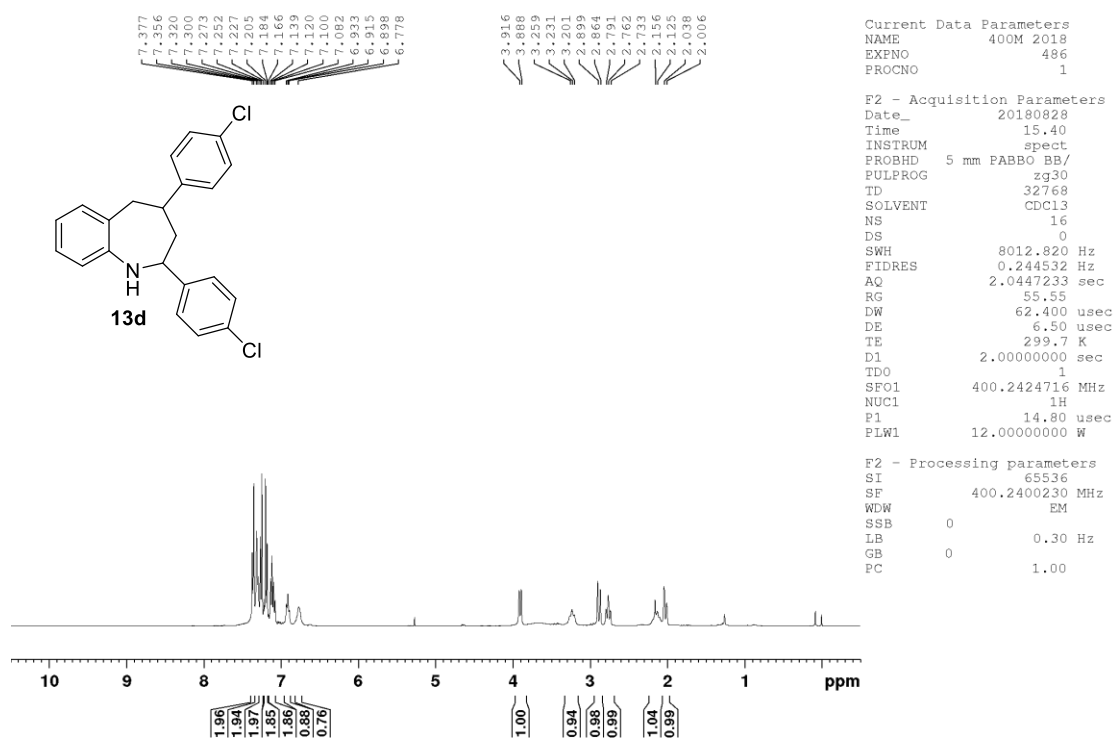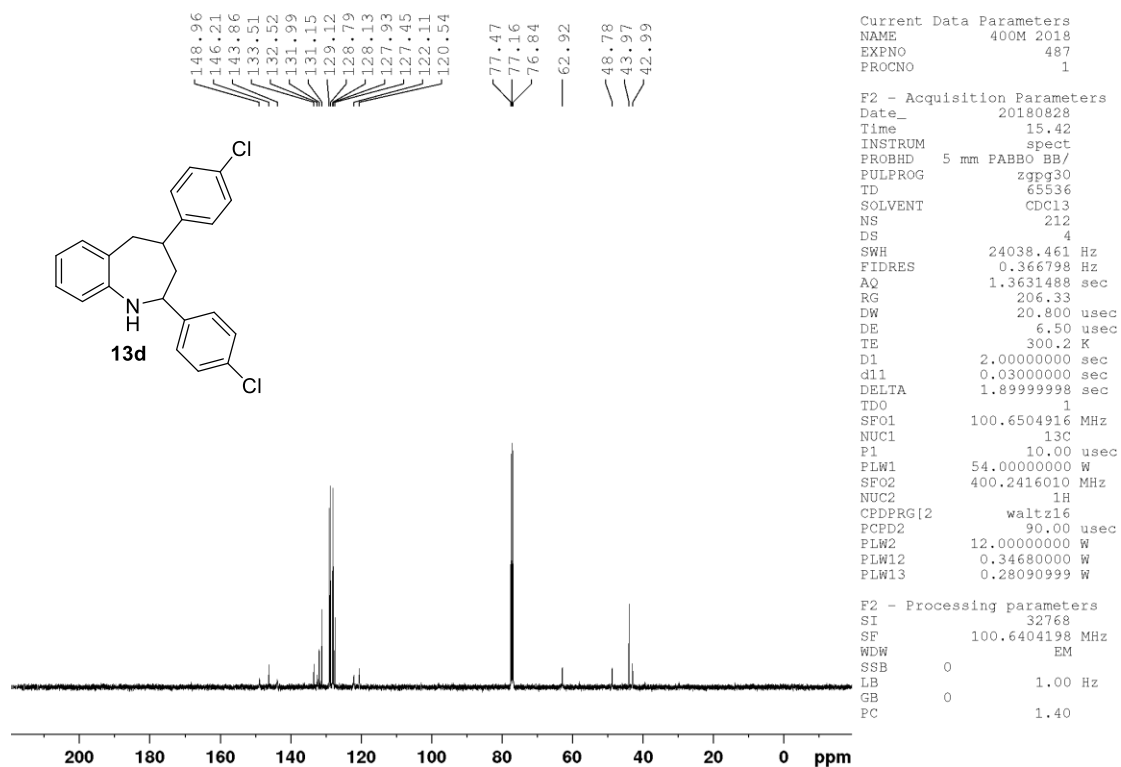

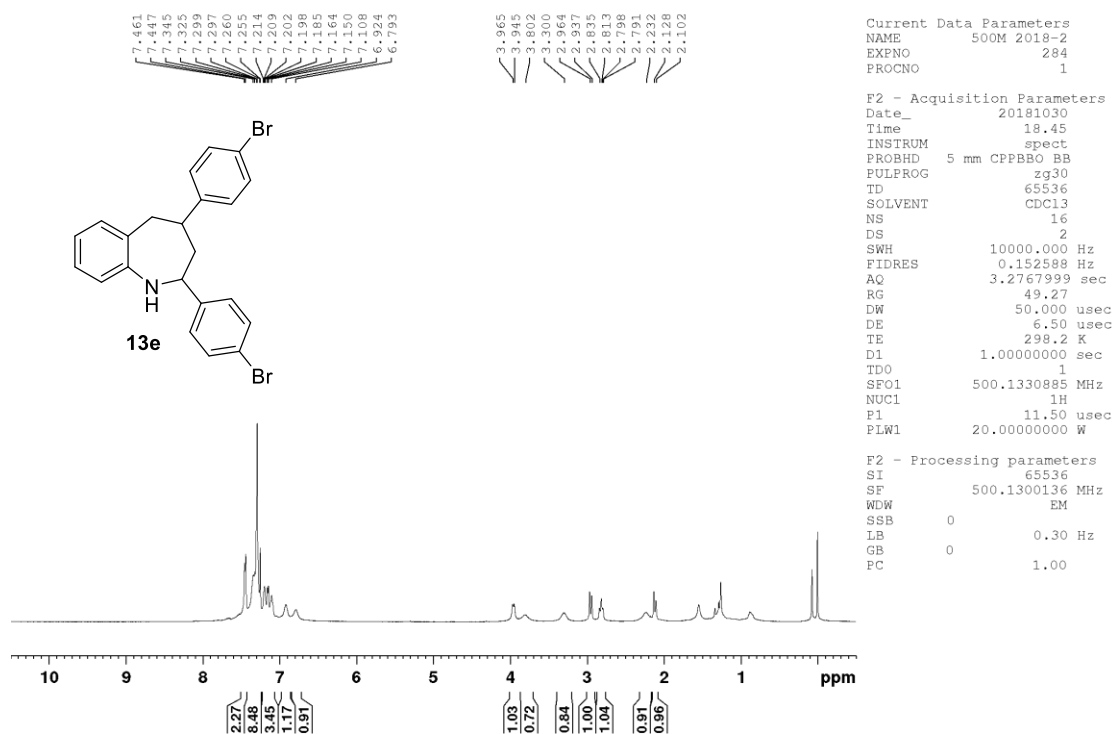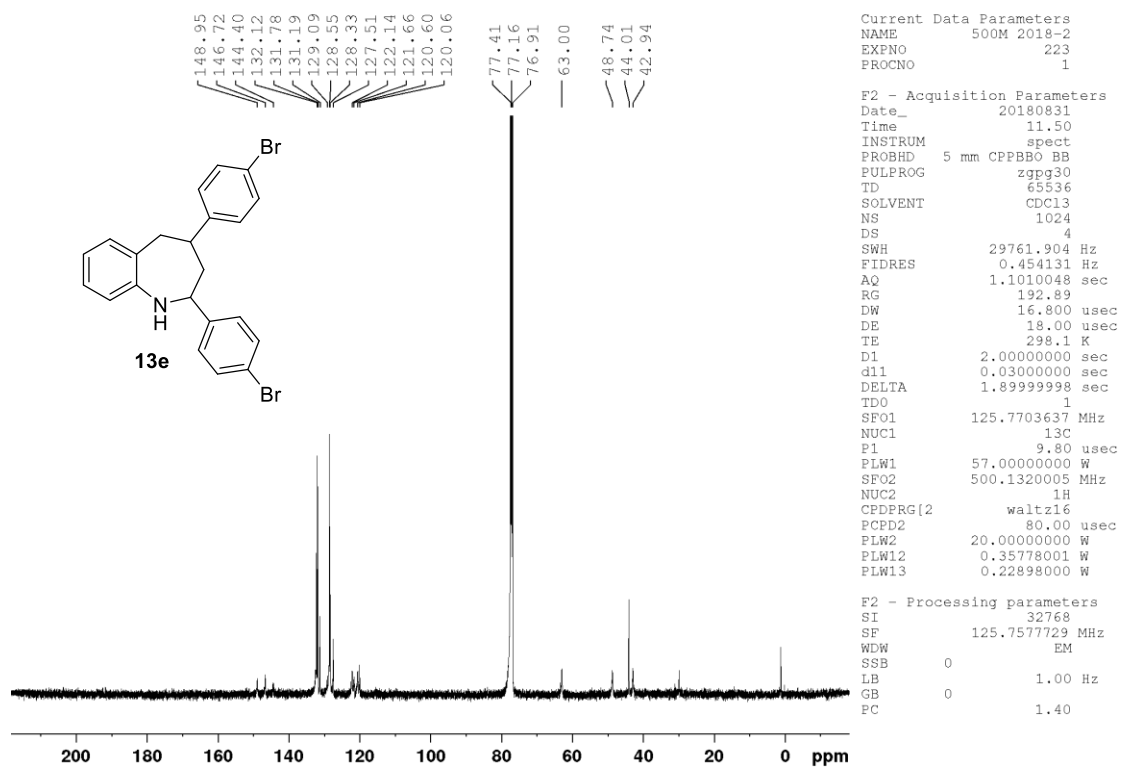

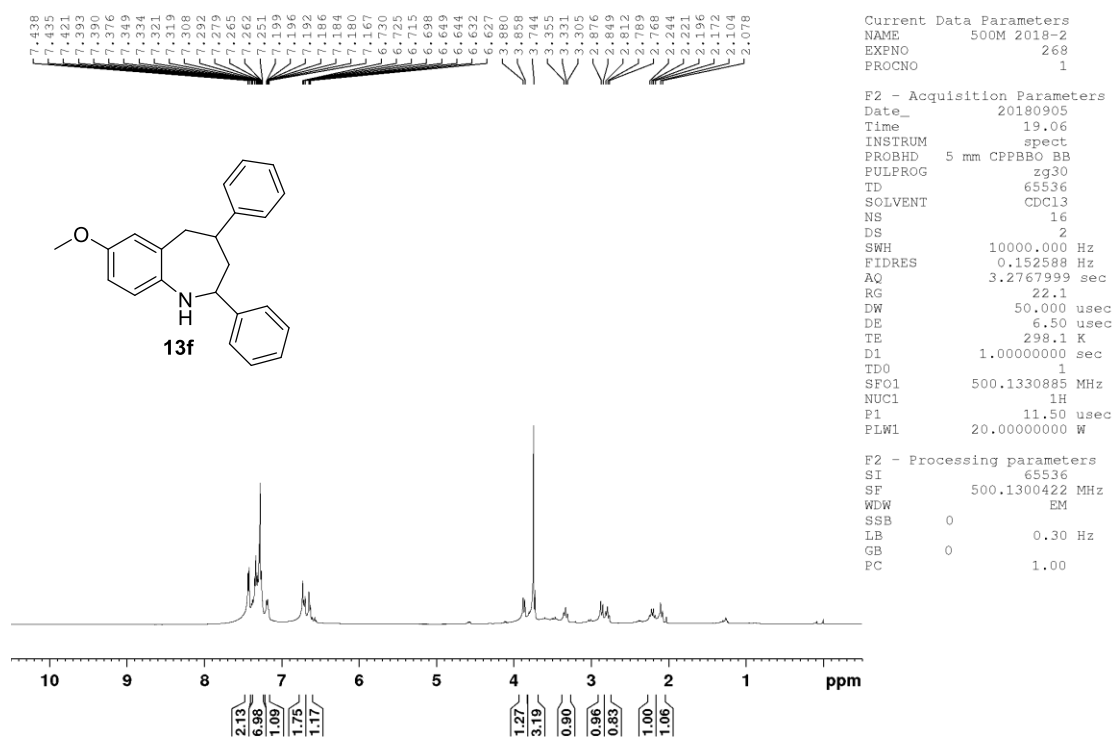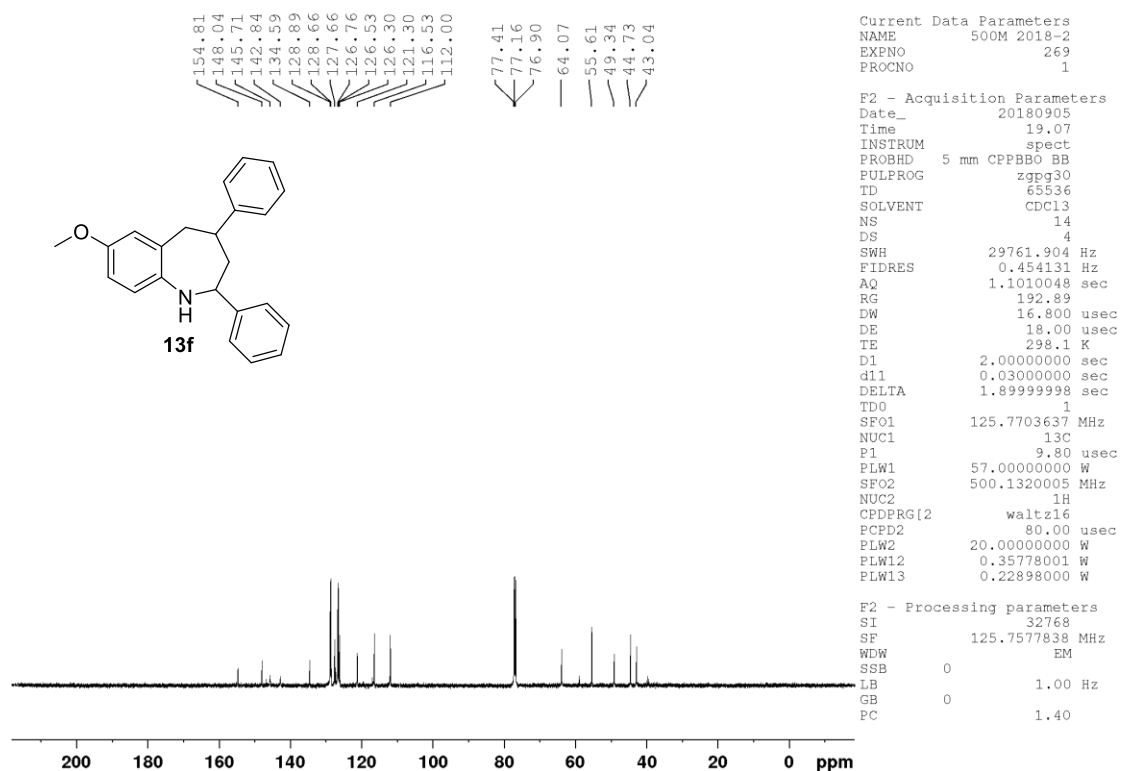

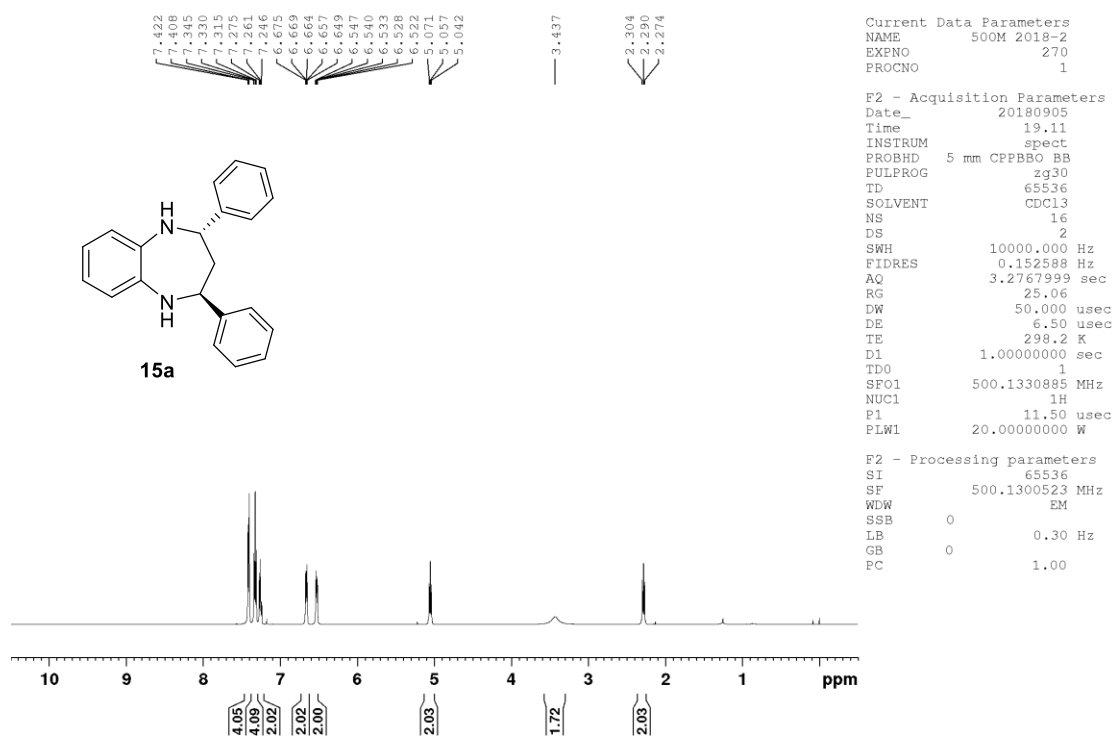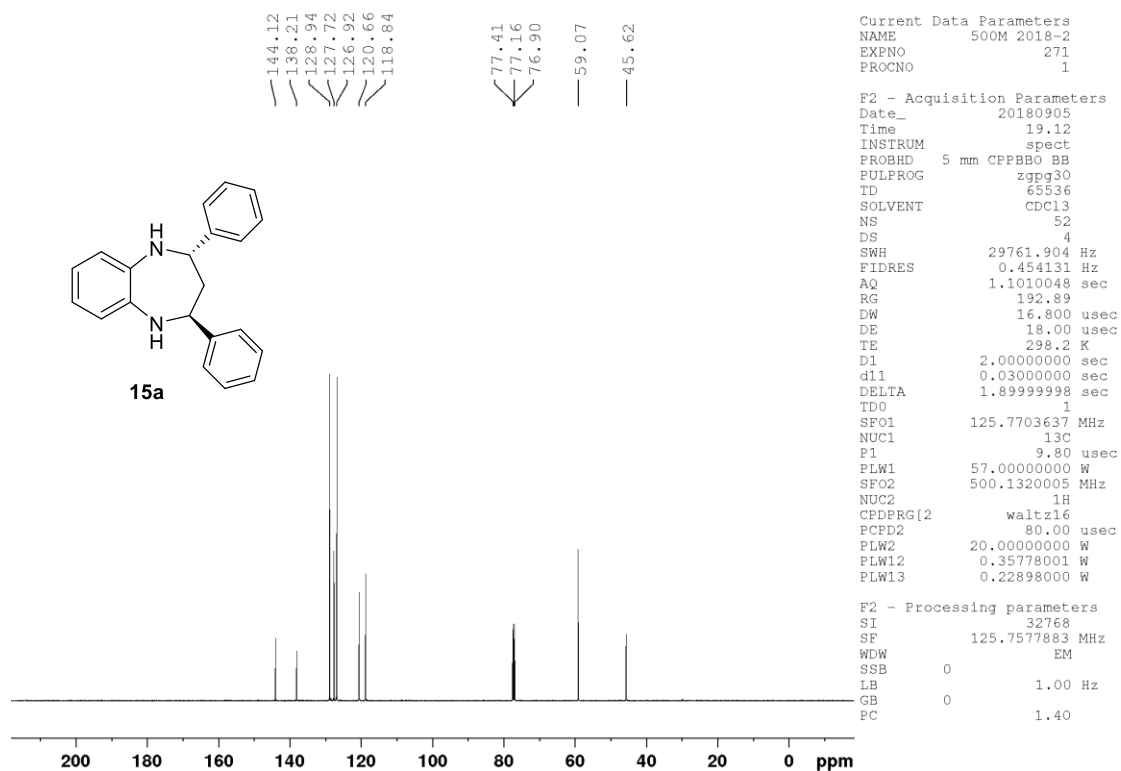

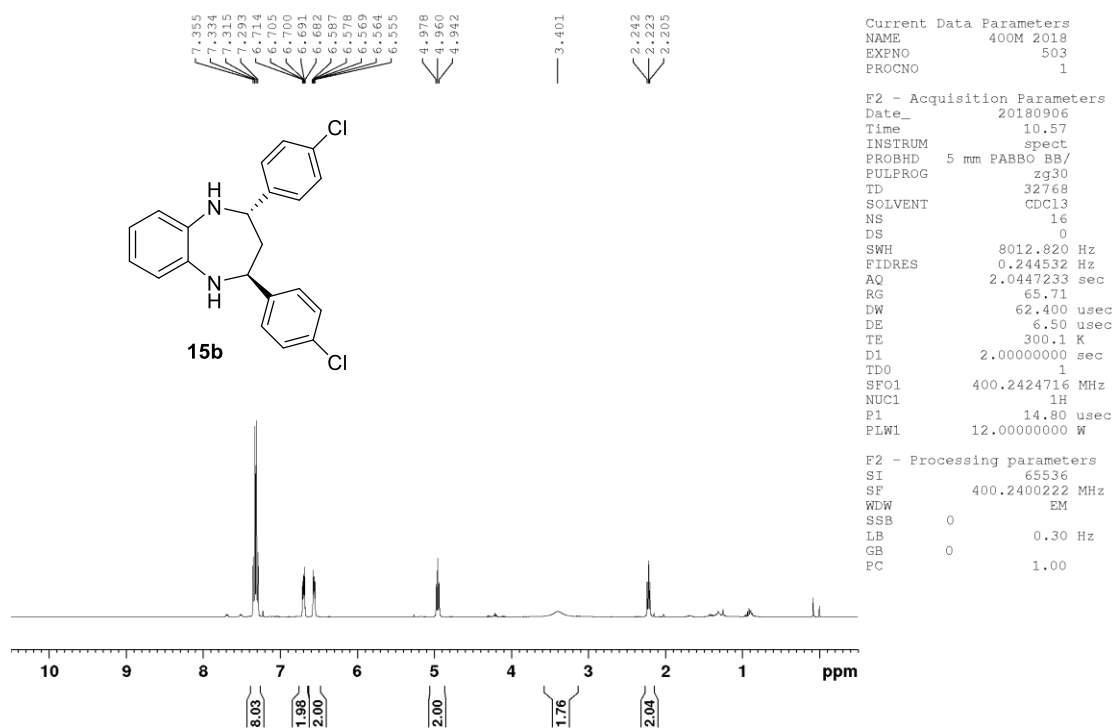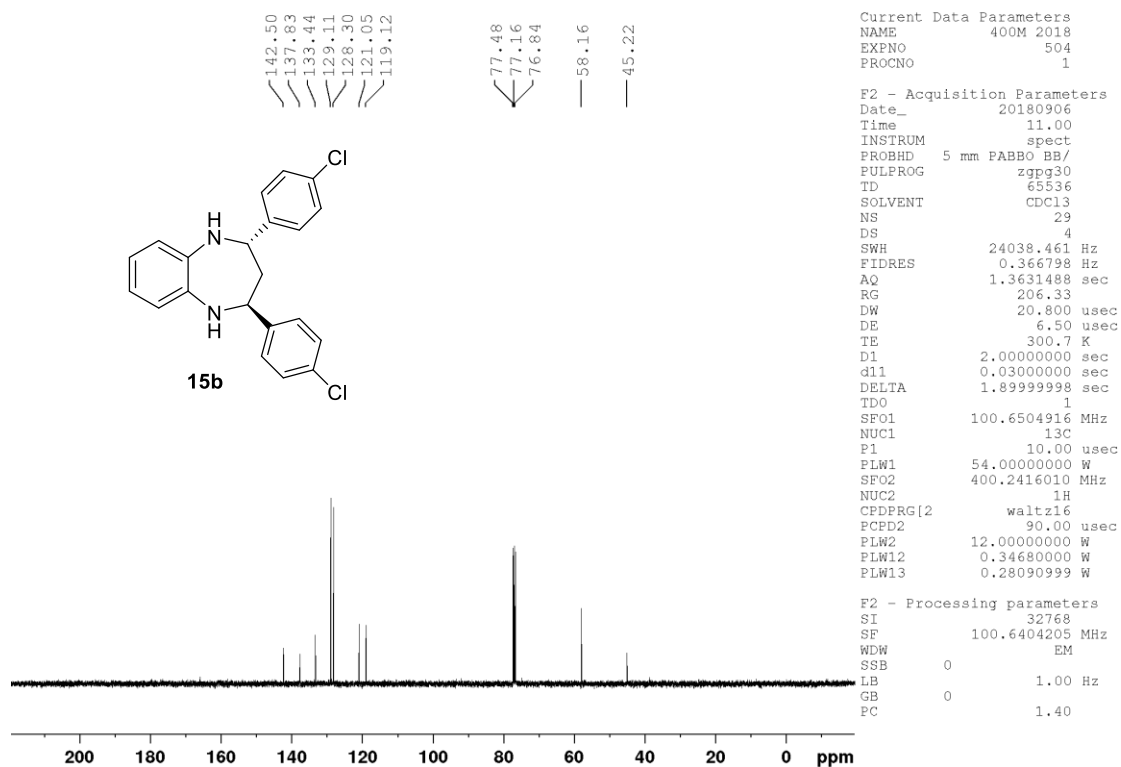

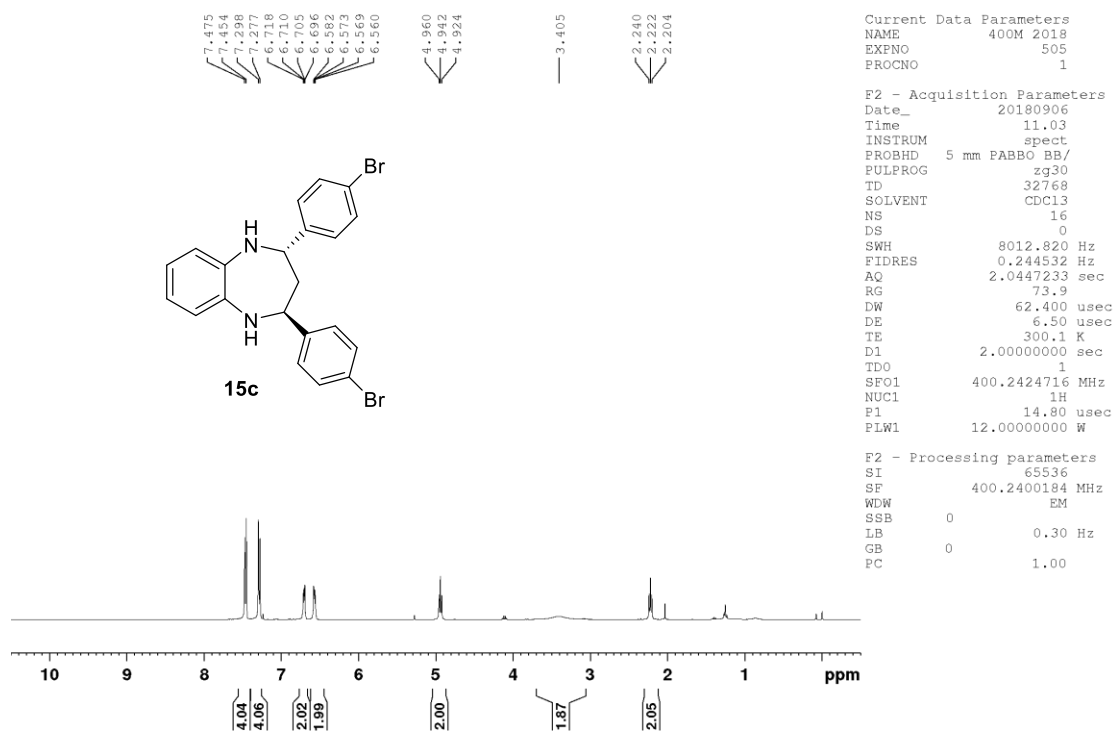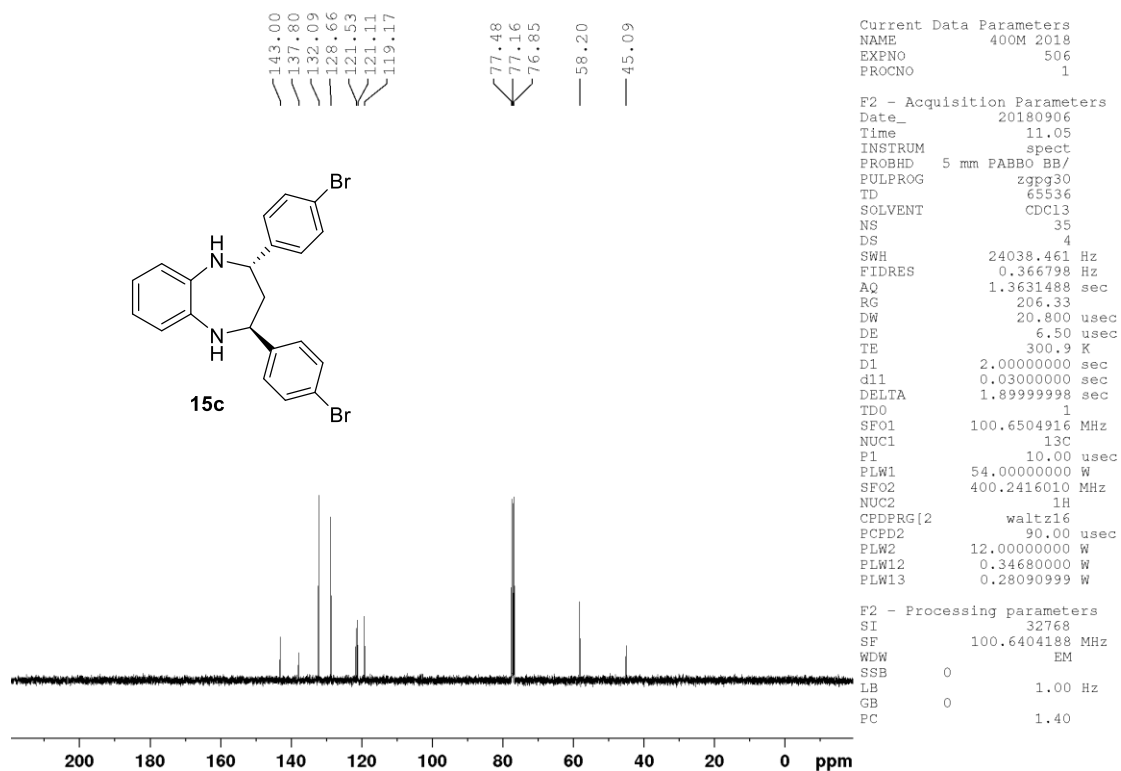

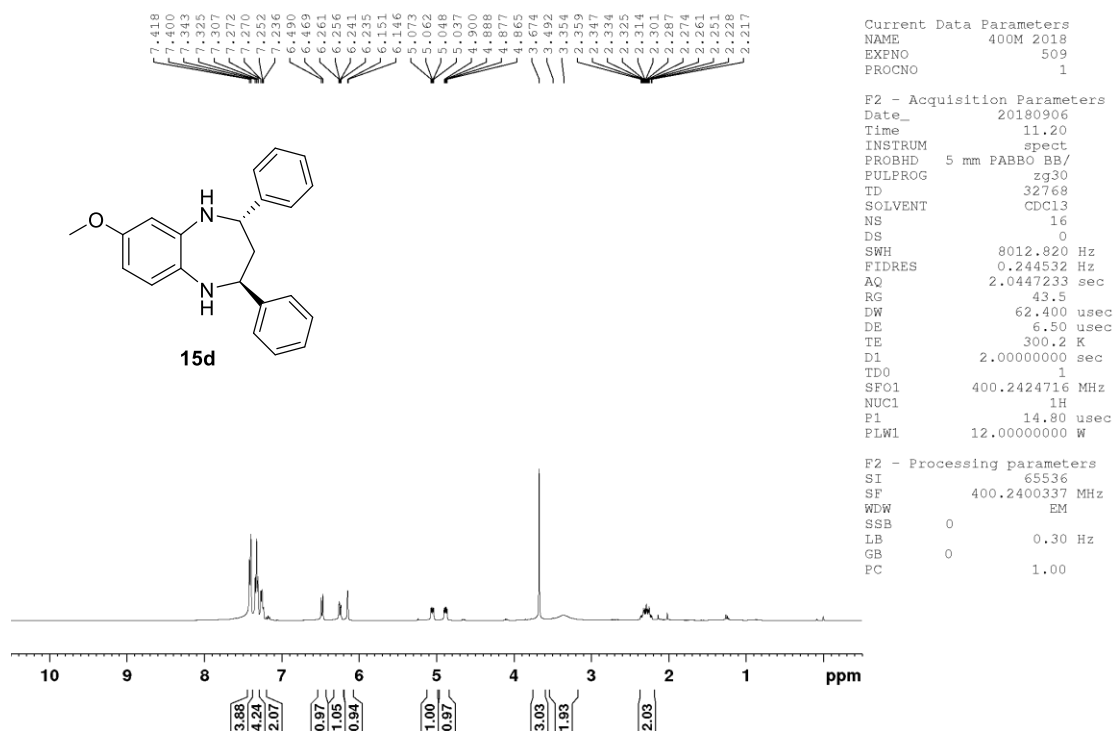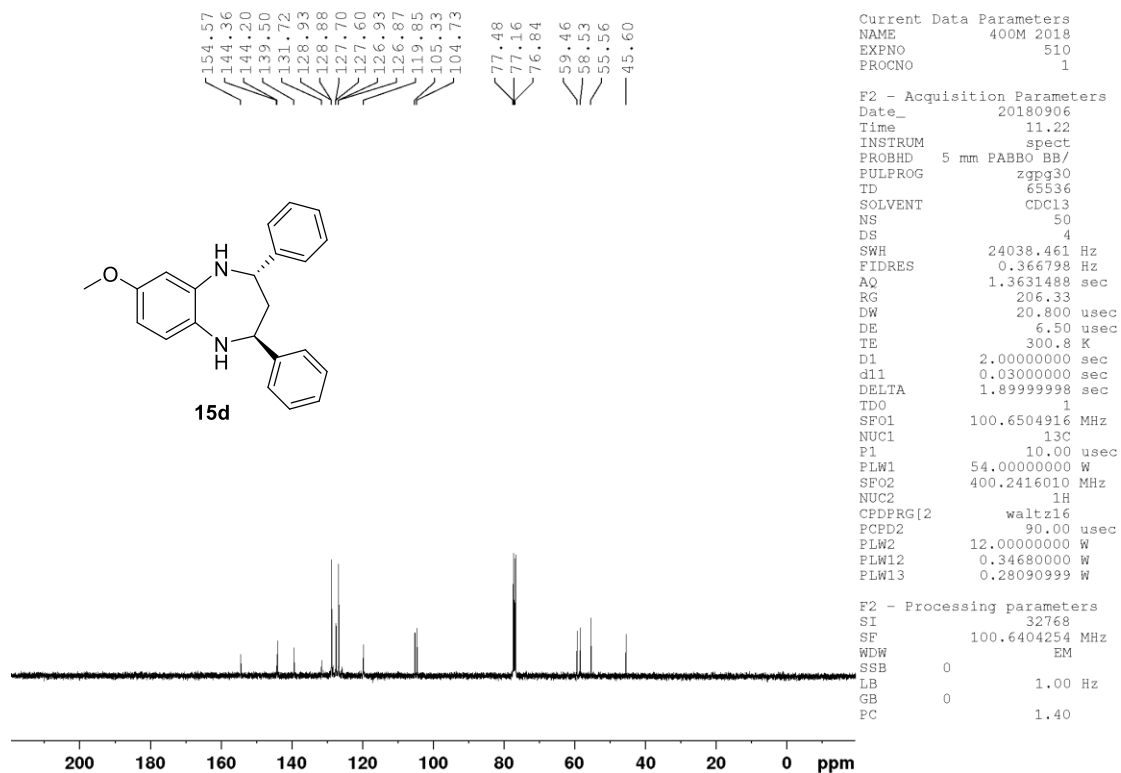

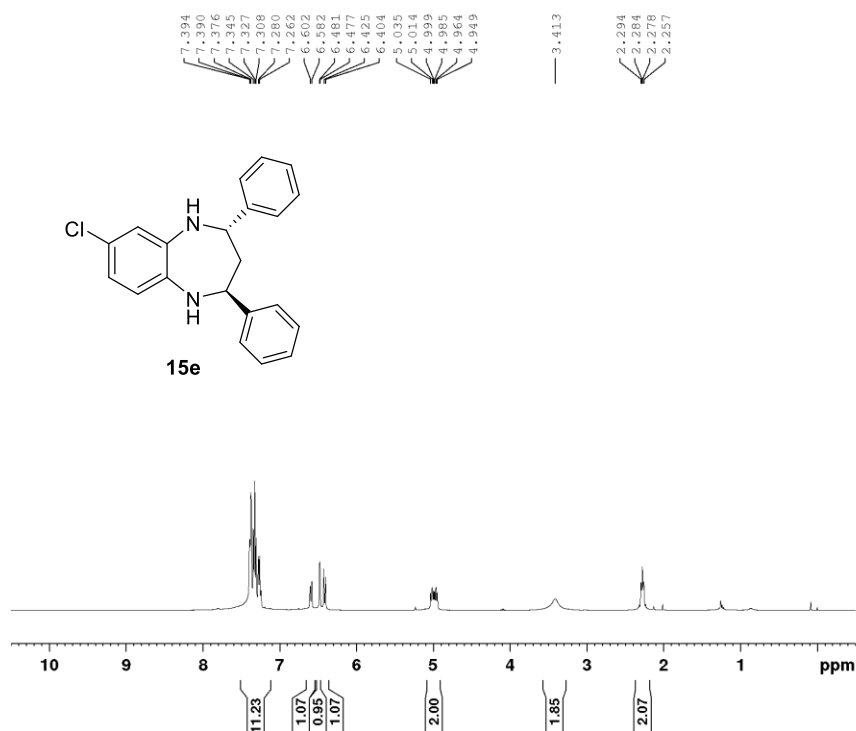

Current Data Parameters  
NAME 400M 2018  
EXPNO 507  
PROCNO 1

F2 - Acquisition Parameters  
Date\_ 20180906  
Time 11.10  
INSTRUM spect  
PROBHD 5 mm PABBO BB/  
PULPROG zg30  
TD 32768  
SOLVENT CDCl3  
NS 16  
DS 0  
SWH 8012.820 Hz  
FIDRES 0.244532 Hz  
AQ 2.0447233 sec  
RG 43.5  
DW 62.400 usec  
DE 6.50 usec  
TE 300.1 K  
D1 2.00000000 sec  
TD0 1  
SFO1 400.2424716 MHz  
NUC1 1H  
P1 14.80 usec  
PLW1 12.00000000 W

F2 - Processing parameters  
SI 65536  
SF 400.2400358 MHz  
WDW EM  
SSB 0  
LB 0.30 Hz  
GB 0  
PC 1.00

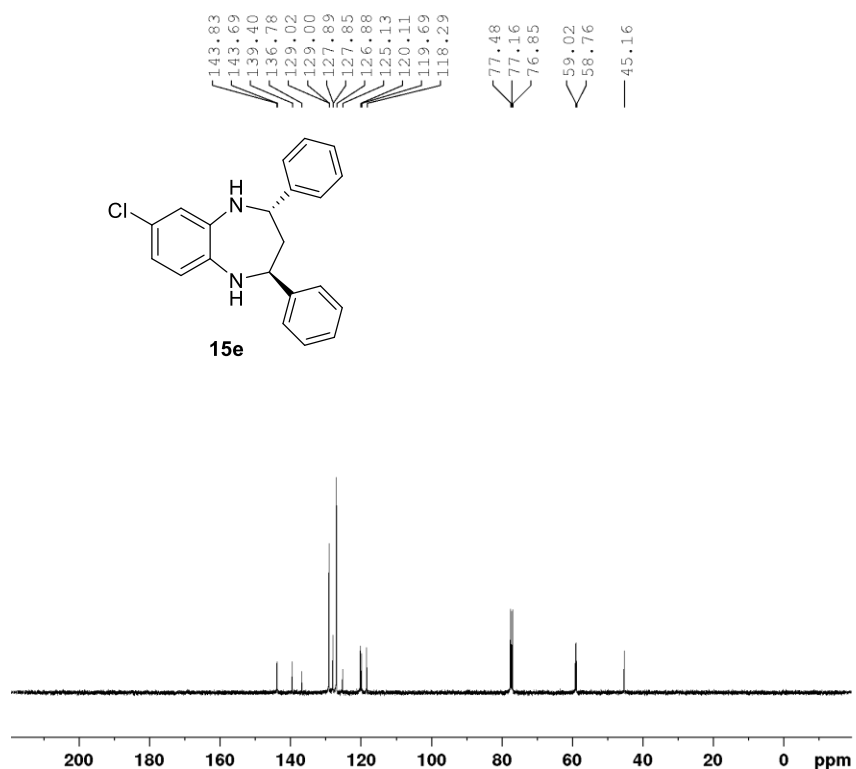

Current Data Parameters  
NAME 400M 2018  
EXPNO 508  
PROCNO 1

F2 - Acquisition Parameters  
Date\_ 20180906  
Time 11.12  
INSTRUM spect  
PROBHD 5 mm PABBO BB/  
PULPROG zgpg30  
TD 65536  
SOLVENT CDCl3  
NS 126  
DS 4  
SWH 24038.461 Hz  
FIDRES 0.366798 Hz  
AQ 1.3631488 sec  
RG 206.33  
DW 20.800 usec  
DE 6.50 usec  
TE 300.8 K  
D1 2.00000000 sec  
d11 0.03000000 sec  
DELTA 1.89999999 sec  
TD0 1  
SFO1 100.6504916 MHz  
NUC1 13C  
P1 10.00 usec  
PLW1 54.00000000 W  
SFO2 400.2416010 MHz  
NUC2 1H  
CPDPRG2 waltz16  
PCPD2 90.00 usec  
PLW2 12.00000000 W  
PLW12 0.34680000 W  
PLW13 0.28090999 W

F2 - Processing parameters  
SI 32768  
SF 100.6404239 MHz  
WDW EM  
SSB 0  
LB 1.00 Hz  
GB 0  
PC 1.40



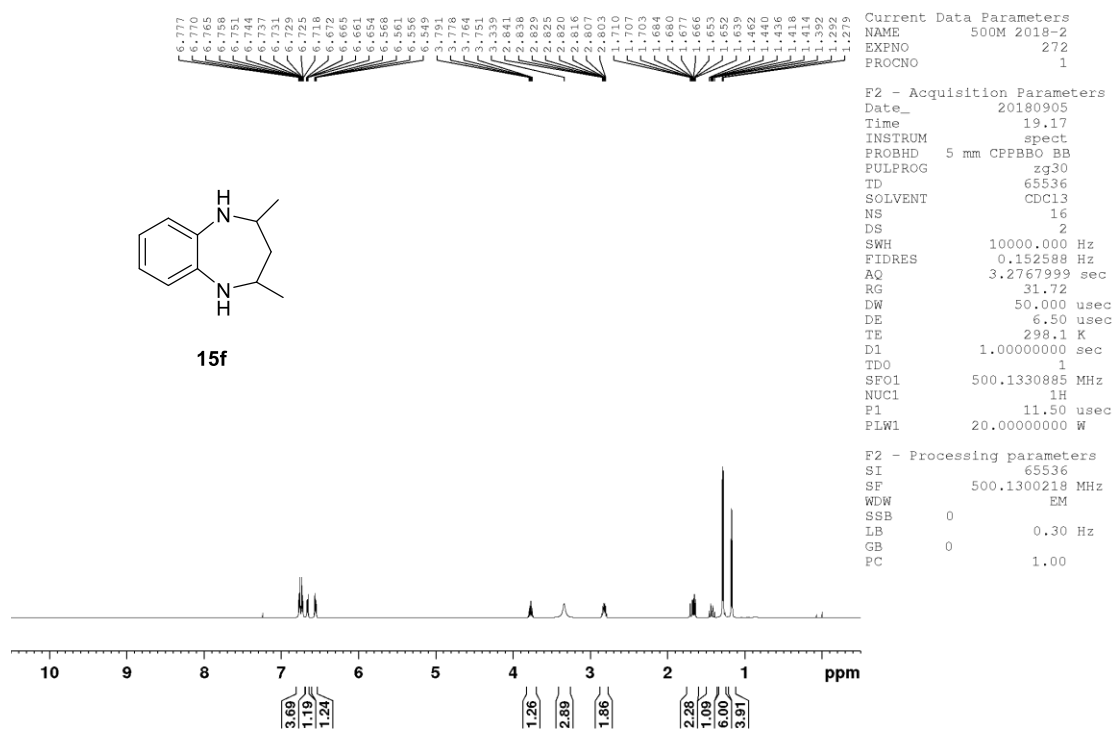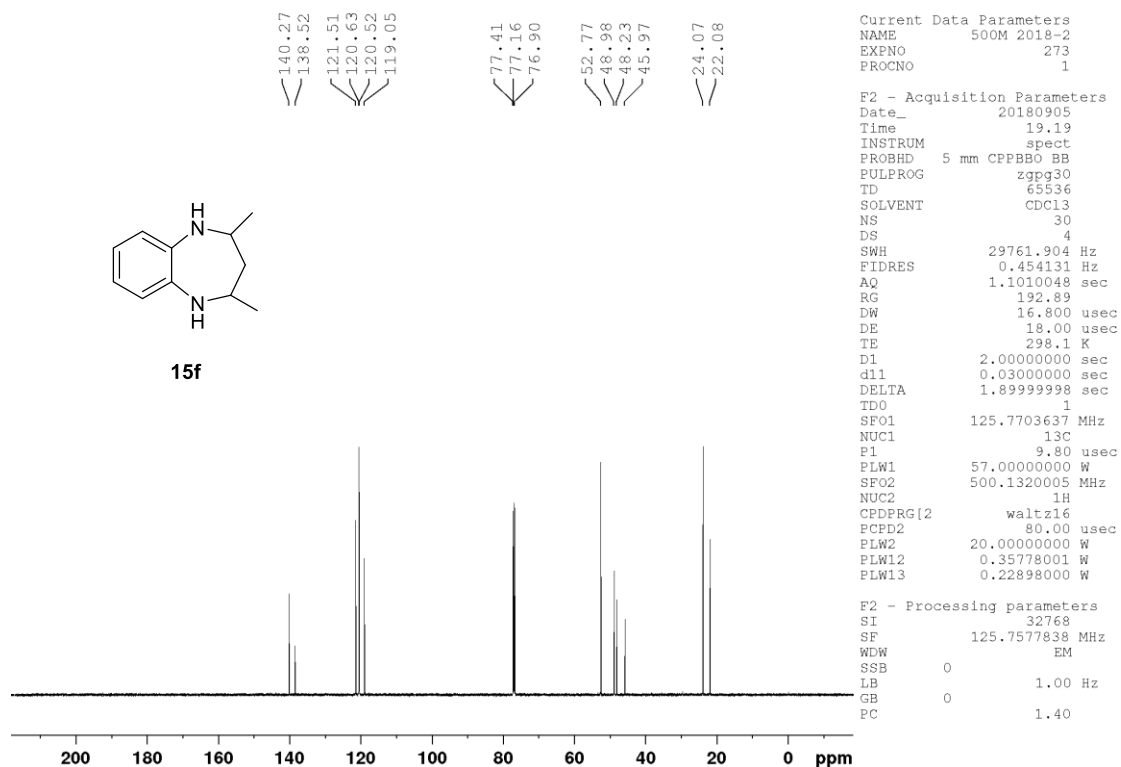

13. Copy of HPLC spectra

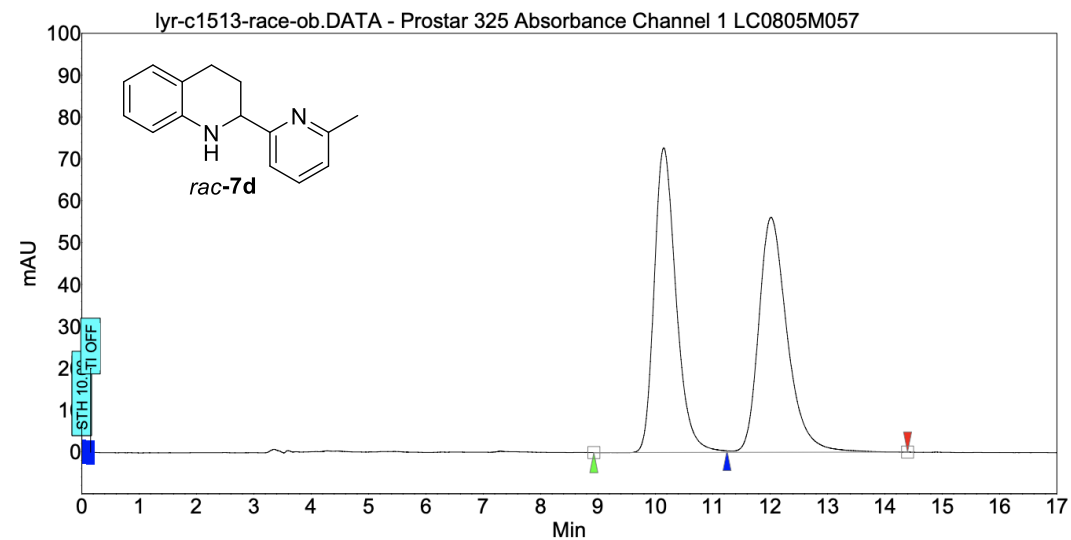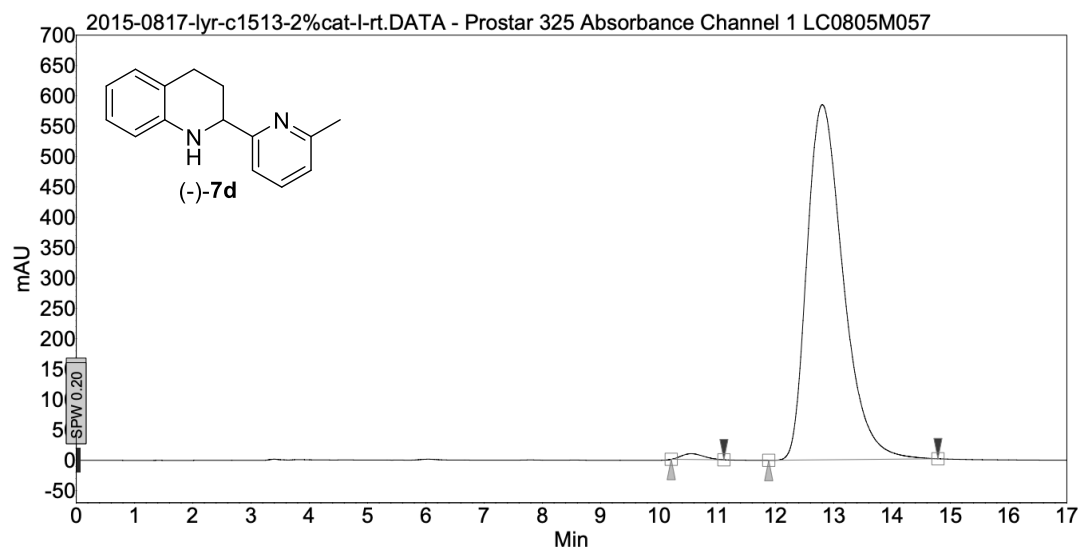

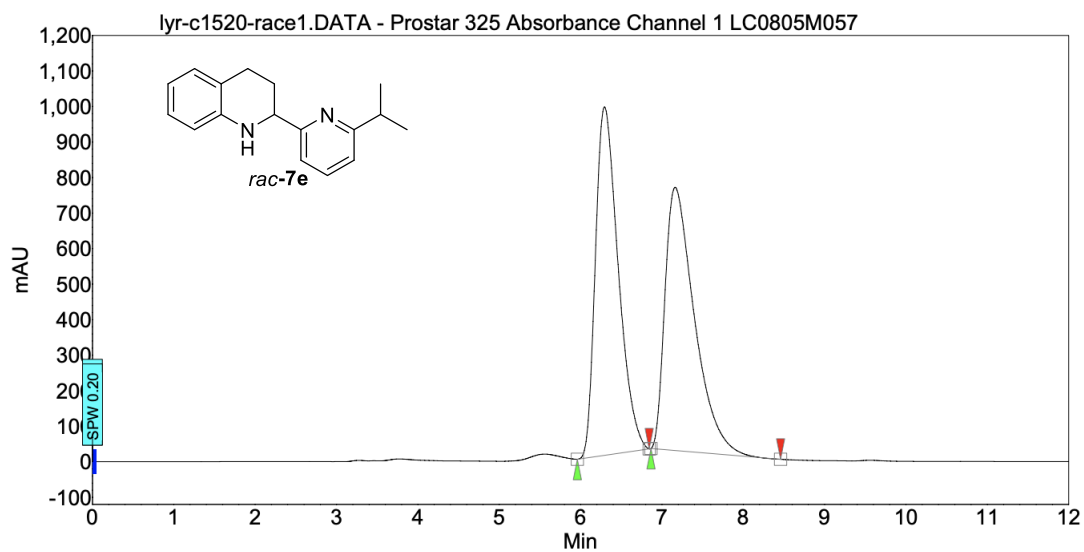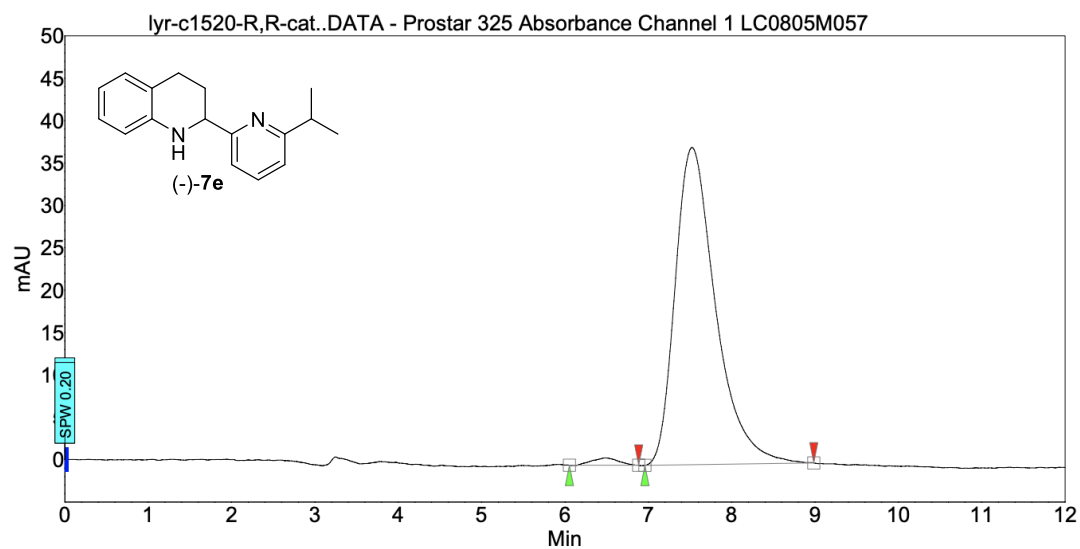

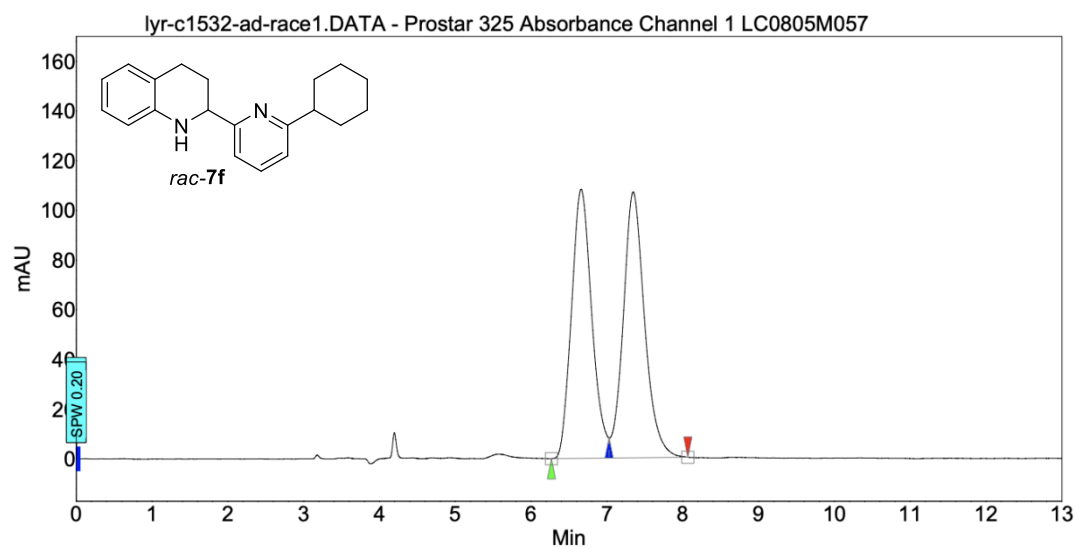

| Index | 文件名 | 时间<br>[Min] | 数量<br>[% 面积] | 高度<br>[mAU] | Area<br>[mAU.Min] | Area %<br>[%] |
|-------|-----|-------------|--------------|-------------|-------------------|---------------|
| 1     | 未知  | 6.66        | 49.02        | 108.3       | 33.6              | 49.018        |
| 2     | 未知  | 7.35        | 50.98        | 107.0       | 35.0              | 50.982        |
| Total |     |             | 100.00       | 215.3       | 68.6              | 100.000       |

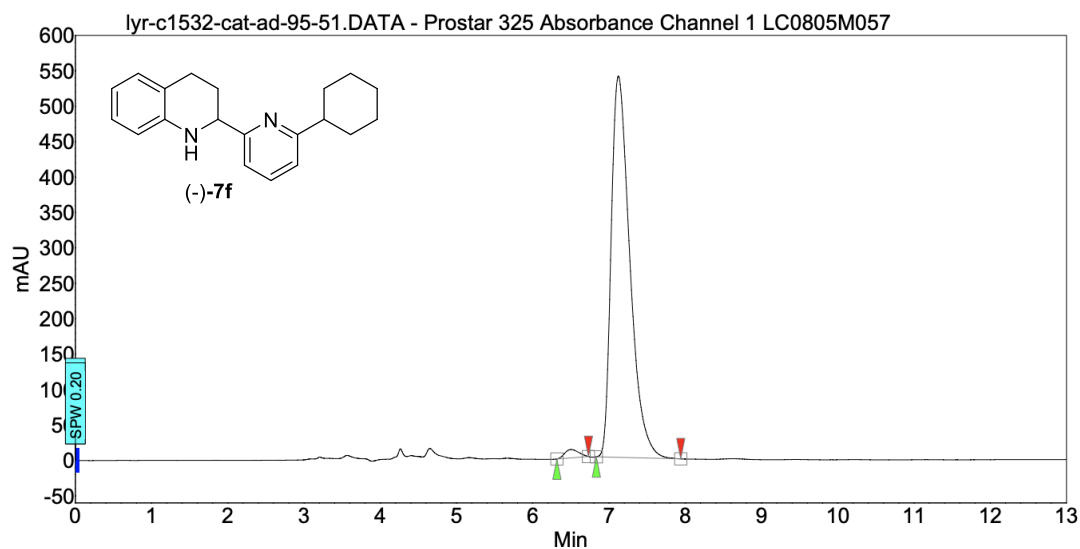

| Index | 文件名 | 时间<br>[Min] | 数量<br>[% 面积] | 高度<br>[mAU] | Area<br>[mAU.Min] | Area %<br>[%] |
|-------|-----|-------------|--------------|-------------|-------------------|---------------|
| 1     | 未知  | 6.49        | 1.63         | 11.9        | 2.5               | 1.631         |
| 2     | 未知  | 7.12        | 98.37        | 538.3       | 152.5             | 98.369        |
| Total |     |             | 100.00       | 550.1       | 155.0             | 100.000       |

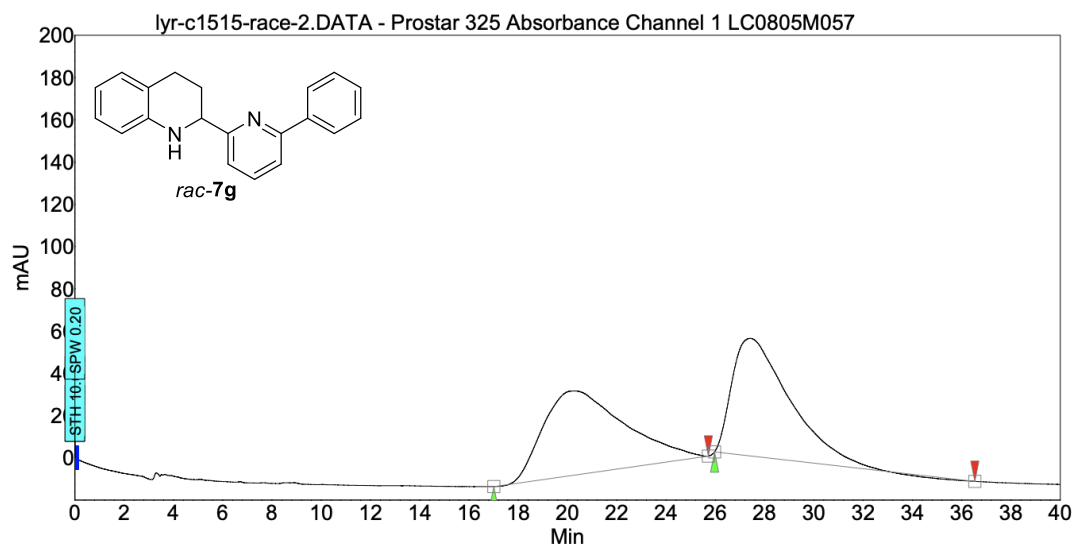

| Index | 文件名 | 时间<br>[Min] | 数量<br>[% 面积] | 高度<br>[mAU] | Area<br>[mAU.Min] | Area %<br>[%] |
|-------|-----|-------------|--------------|-------------|-------------------|---------------|
| 1     | 未知  | 20.10       | 50.21        | 40.0        | 151.9             | 50.213        |
| 2     | 未知  | 27.43       | 49.79        | 55.7        | 150.7             | 49.787        |
| Total |     |             | 100.00       | 95.7        | 302.6             | 100.000       |

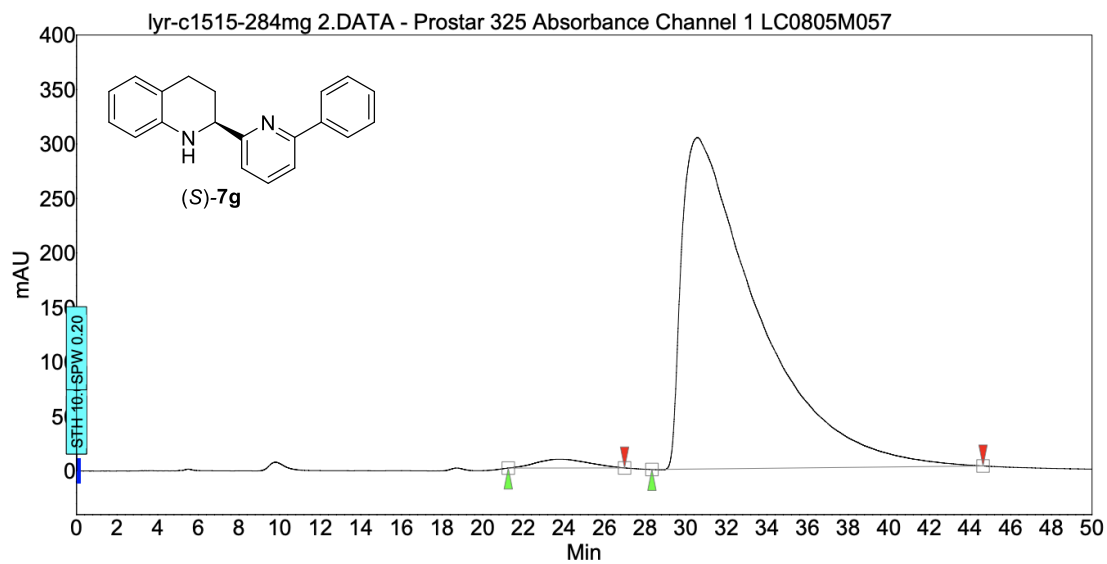

| Index | 文件名 | 时间<br>[Min] | 数量<br>[% 面积] | 高度<br>[mAU] | Area<br>[mAU.Min] | Area %<br>[%] |
|-------|-----|-------------|--------------|-------------|-------------------|---------------|
| 1     | 未知  | 23.66       | 1.78         | 8.0         | 23.9              | 1.777         |
| 2     | 未知  | 30.57       | 98.22        | 304.1       | 1321.2            | 98.223        |
| Total |     |             | 100.00       | 312.0       | 1345.1            | 100.000       |

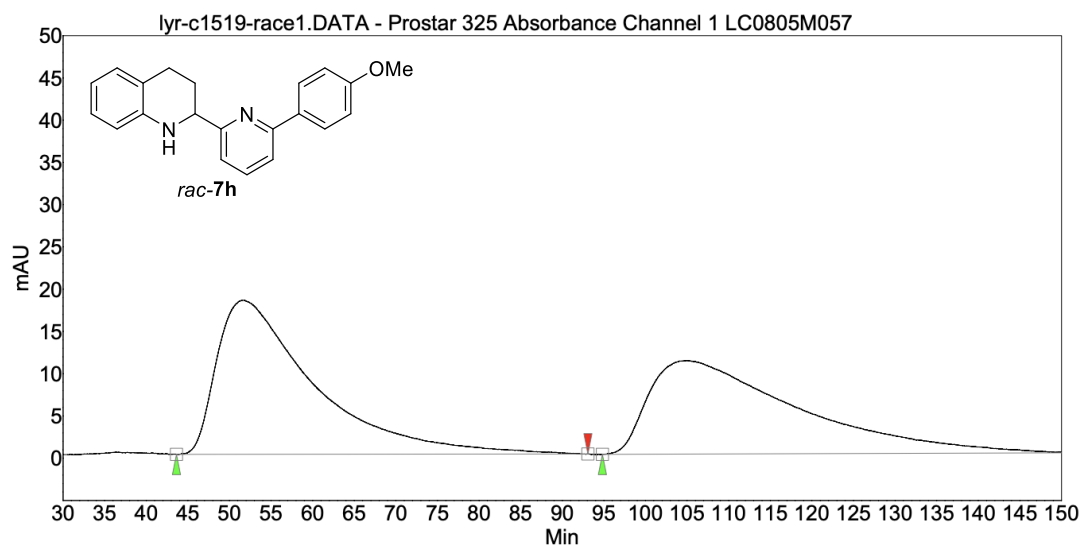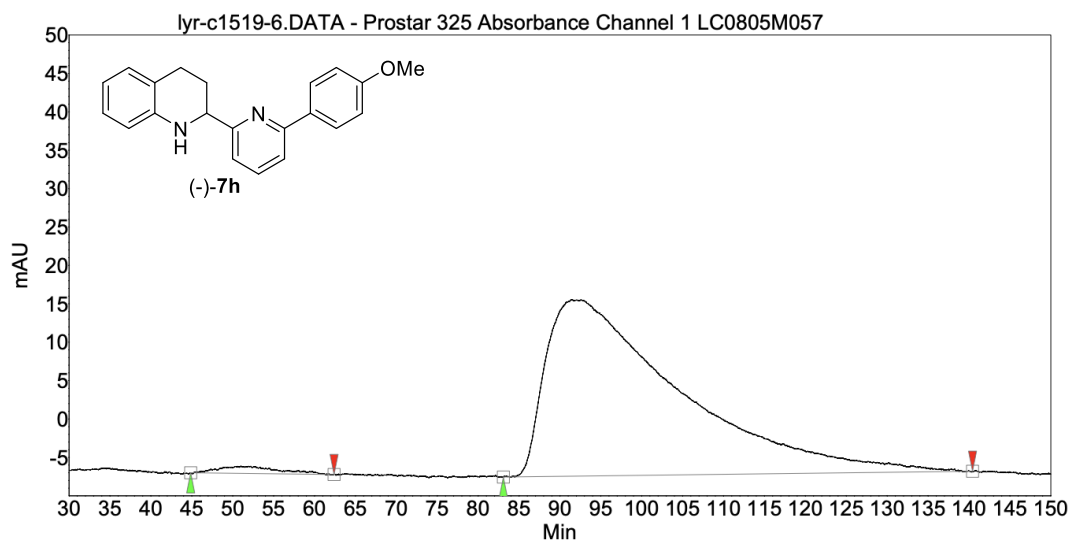

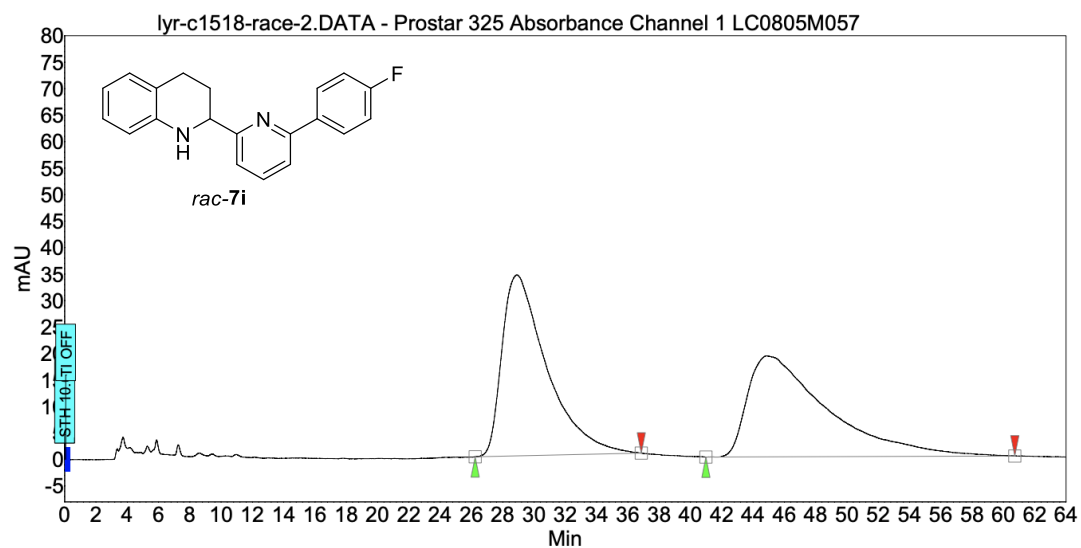

| Index | 文件名 | 时间<br>[Min] | 数量<br>[% 面积] | 高度<br>[mAU] | Area<br>[mAU.Min] | Area %<br>[%] |
|-------|-----|-------------|--------------|-------------|-------------------|---------------|
| 1     | 未知  | 28.91       | 50.21        | 34.2        | 113.4             | 50.209        |
| 2     | 未知  | 44.86       | 49.79        | 19.1        | 112.4             | 49.791        |
| Total |     |             | 100.00       | 53.2        | 225.8             | 100.000       |

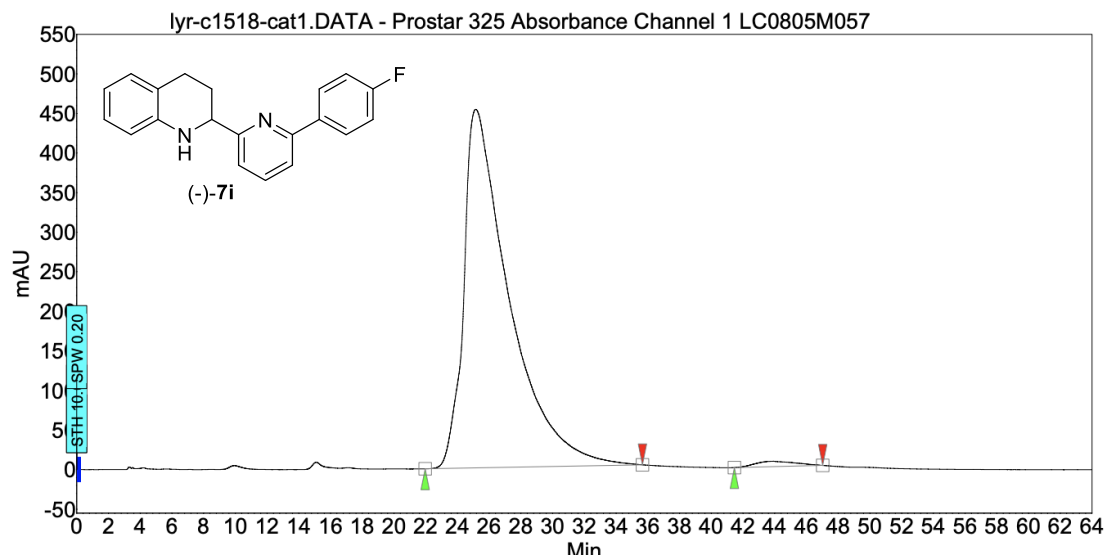

| Index | 文件名 | 时间<br>[Min] | 数量<br>[% 面积] | 高度<br>[mAU] | Area<br>[mAU.Min] | Area %<br>[%] |
|-------|-----|-------------|--------------|-------------|-------------------|---------------|
| 1     | 未知  | 25.15       | 98.69        | 453.1       | 1498.5            | 98.693        |
| 2     | 未知  | 43.85       | 1.31         | 6.8         | 19.8              | 1.307         |
| Total |     |             | 100.00       | 459.9       | 1518.3            | 100.000       |

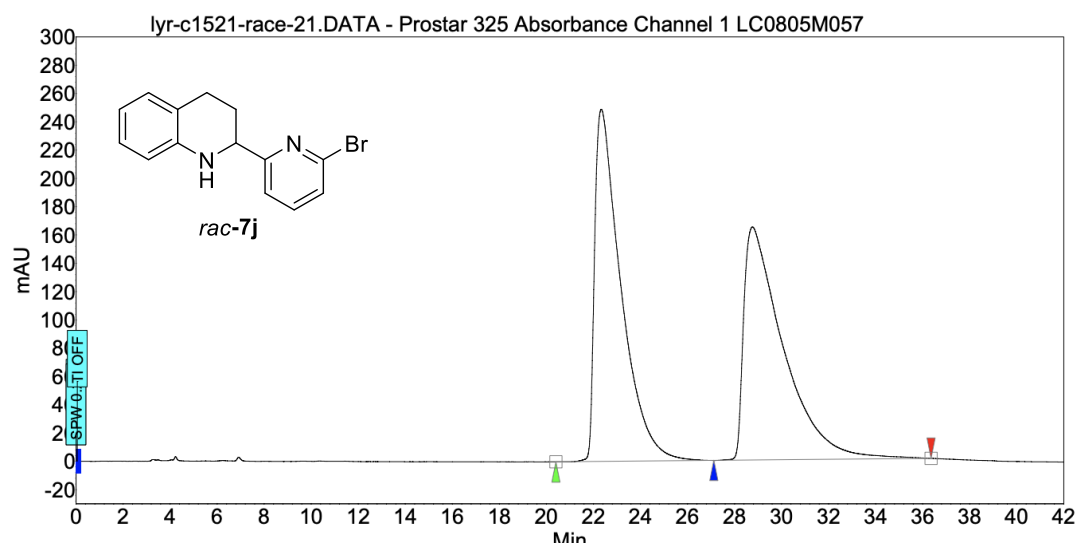

| Index | 文件名 | 时间 [Min] | 数量 [% 面积] | 高度 [mAU] | Area [mAU.Min] | Area % [%] |
|-------|-----|----------|-----------|----------|----------------|------------|
| 1     | 未知  | 22.33    | 50.11     | 248.9    | 321.5          | 50.113     |
| 2     | 未知  | 28.77    | 49.89     | 164.7    | 320.0          | 49.887     |
| Total |     |          | 100.00    | 413.6    | 641.5          | 100.000    |

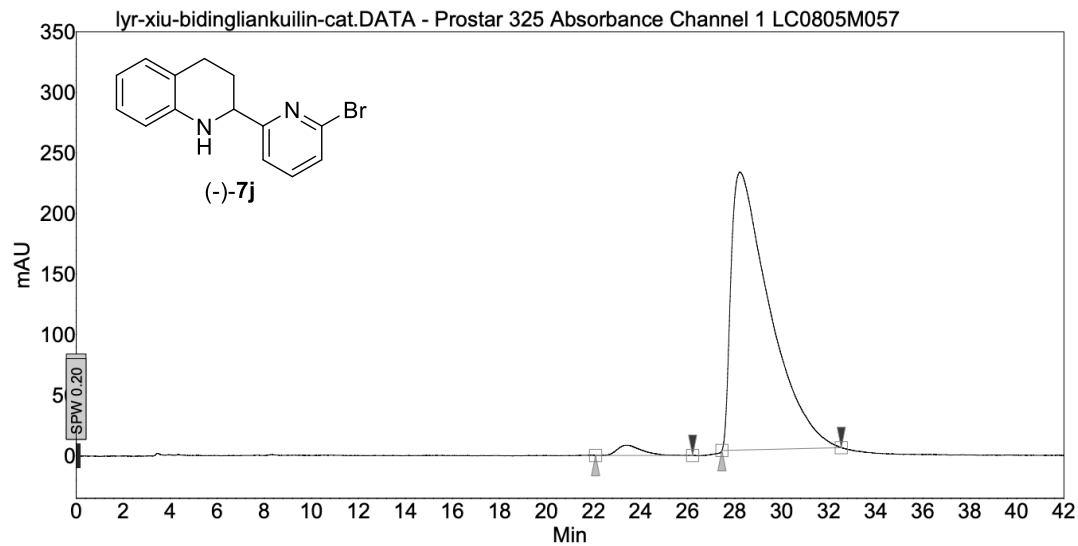

| Index | 文件名 | 时间 [Min] | 数量 [% 面积] | 高度 [mAU] | Area [mAU.Min] | Area % [%] |
|-------|-----|----------|-----------|----------|----------------|------------|
| 2     | 未知  | 23.37    | 2.34      | 8.4      | 10.4           | 2.336      |
| 1     | 未知  | 28.23    | 97.66     | 229.4    | 436.8          | 97.664     |
| Total |     |          | 100.00    | 237.8    | 447.2          | 100.000    |



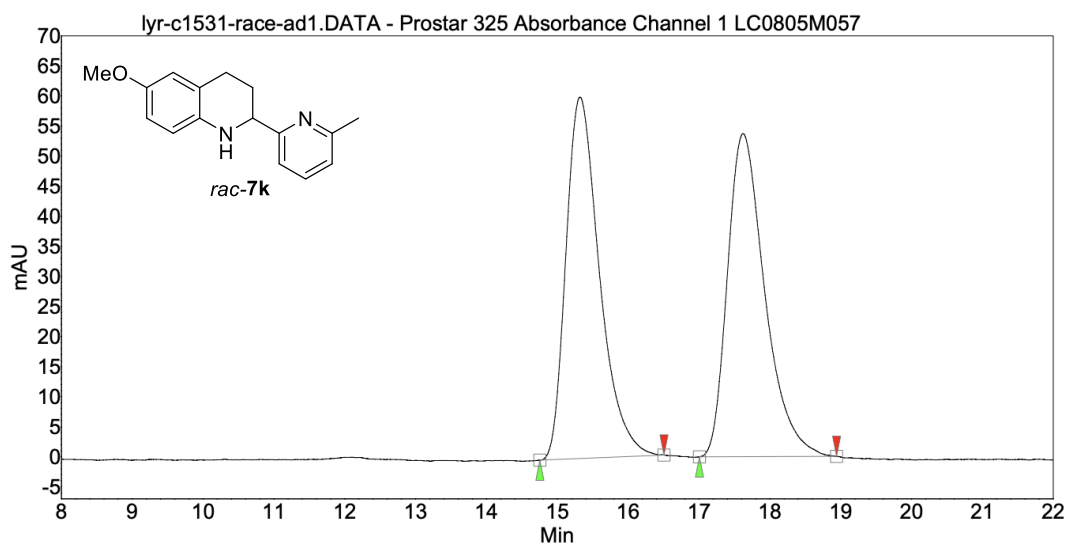

| Index | 文件名 | 时间<br>[Min] | 数量<br>[% 面积] | 高度<br>[mAU] | Area<br>[mAU.Min] | Area %<br>[%] |
|-------|-----|-------------|--------------|-------------|-------------------|---------------|
| 2     | 未知  | 15.32       | 50.11        | 60.1        | 32.9              | 50.109        |
| 1     | 未知  | 17.62       | 49.89        | 53.7        | 32.8              | 49.891        |
| Total |     |             | 100.00       | 113.8       | 65.7              | 100.000       |

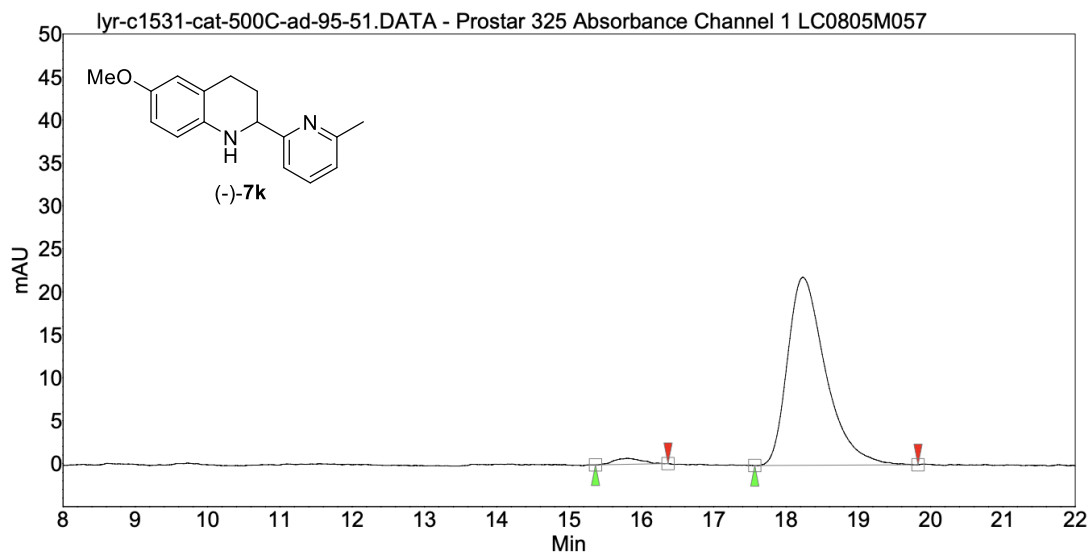

| Index | 文件名 | 时间<br>[Min] | 数量<br>[% 面积] | 高度<br>[mAU] | Area<br>[mAU.Min] | Area %<br>[%] |
|-------|-----|-------------|--------------|-------------|-------------------|---------------|
| 1     | 未知  | 15.80       | 2.28         | 0.7         | 0.3               | 2.283         |
| 2     | 未知  | 18.23       | 97.72        | 21.9        | 13.4              | 97.717        |
| Total |     |             | 100.00       | 22.6        | 13.7              | 100.000       |

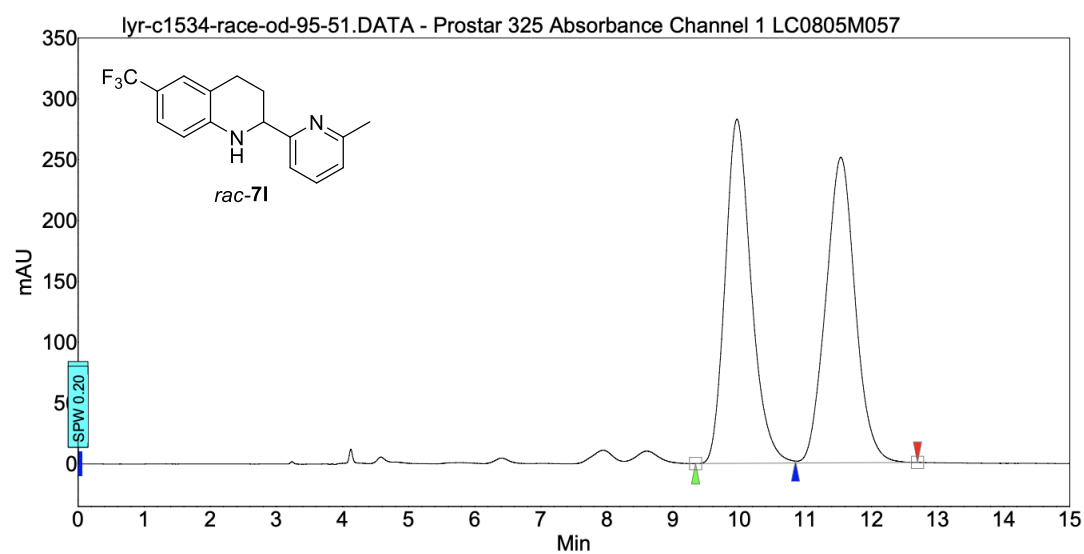

| Index | 文件名 | 时间<br>[Min] | 数量<br>[% 面积] | 高度<br>[mAU] | Area<br>[mAU.Min] | Area %<br>[%] |
|-------|-----|-------------|--------------|-------------|-------------------|---------------|
| 1     | 未知  | 9.97        | 49.90        | 283.0       | 129.1             | 49.902        |
| 2     | 未知  | 11.54       | 50.10        | 251.1       | 129.6             | 50.098        |
| Total |     |             | 100.00       | 534.1       | 258.6             | 100.000       |

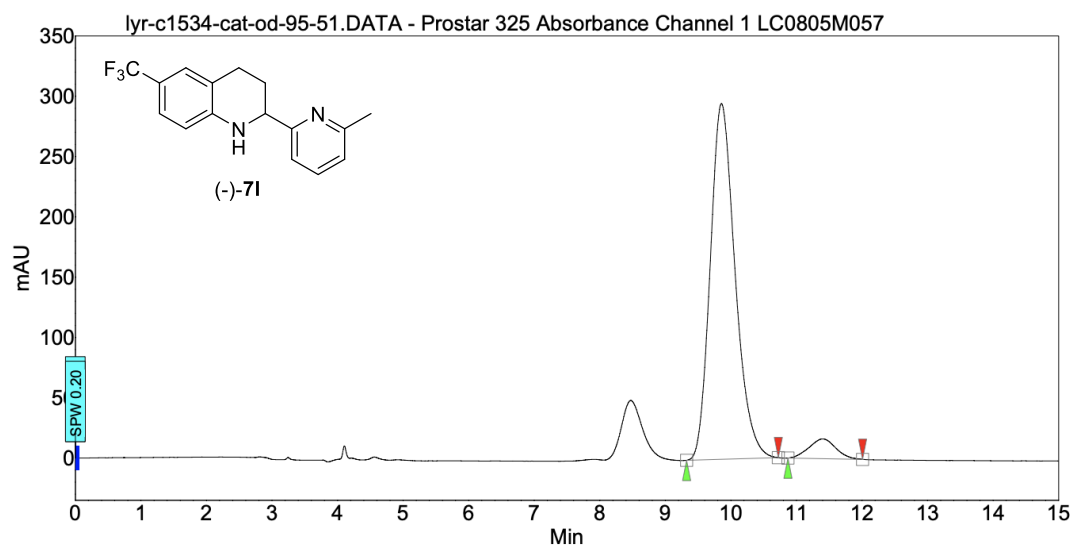

| Index | 文件名 | 时间<br>[Min] | 数量<br>[% 面积] | 高度<br>[mAU] | Area<br>[mAU.Min] | Area %<br>[%] |
|-------|-----|-------------|--------------|-------------|-------------------|---------------|
| 1     | 未知  | 9.85        | 94.37        | 294.9       | 129.6             | 94.367        |
| 2     | 未知  | 11.40       | 5.63         | 16.3        | 7.7               | 5.633         |
| Total |     |             | 100.00       | 311.2       | 137.4             | 100.000       |

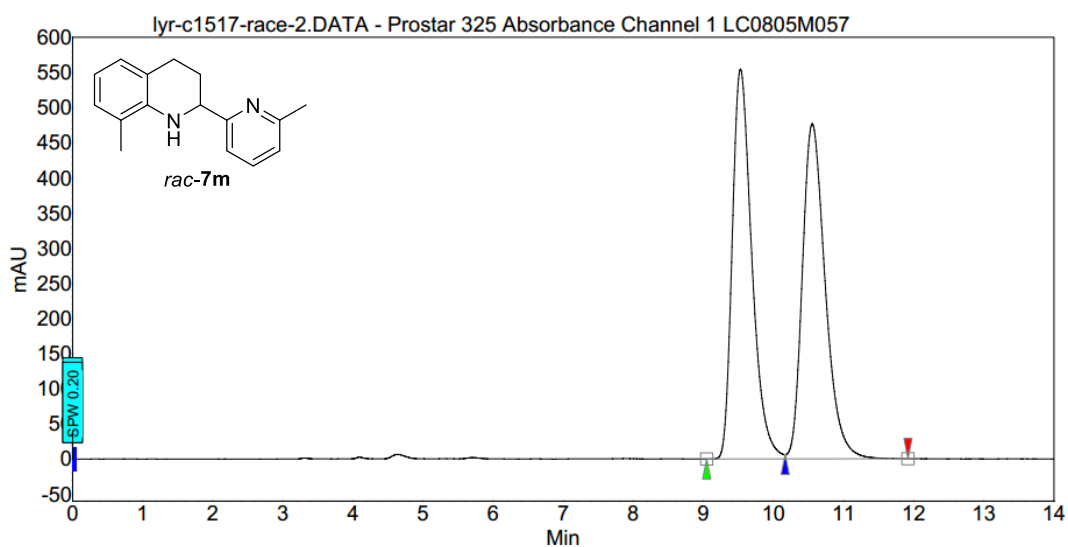

| Index | 文件名 | 时间<br>[Min] | 数量<br>[% 面积] | 高度<br>[mAU] | Area<br>[mAU.Min] | Area %<br>[%] |
|-------|-----|-------------|--------------|-------------|-------------------|---------------|
| 1     | 未知  | 9.53        | 49.86        | 554.6       | 179.4             | 49.860        |
| 2     | 未知  | 10.55       | 50.14        | 476.8       | 180.4             | 50.140        |
| Total |     |             | 100.00       | 1031.4      | 359.8             | 100.000       |

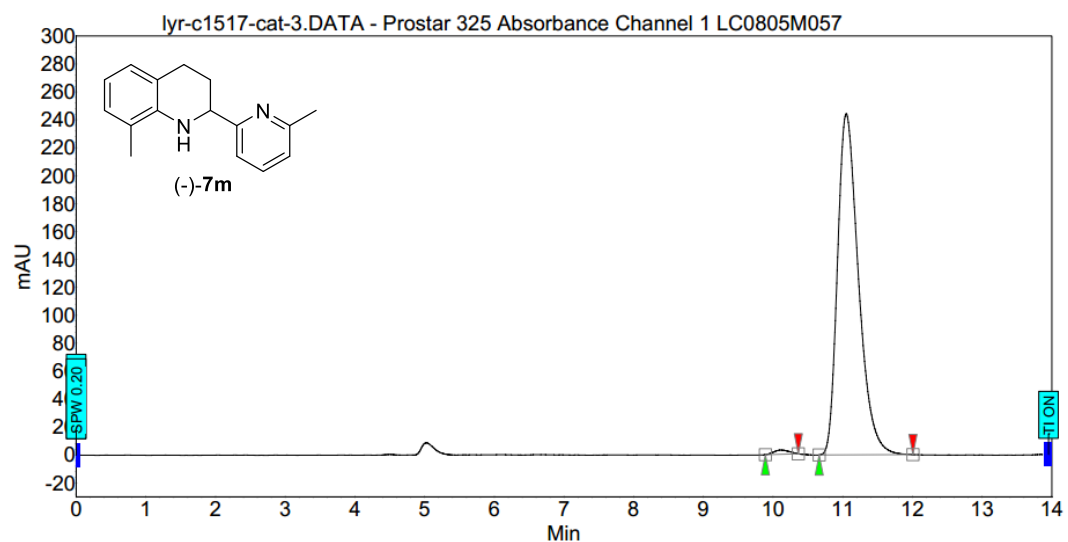

| Index | 文件名 | 时间<br>[Min] | 数量<br>[% 面积] | 高度<br>[mAU] | Area<br>[mAU.Min] | Area %<br>[%] |
|-------|-----|-------------|--------------|-------------|-------------------|---------------|
| 1     | 未知  | 10.11       | 0.90         | 3.0         | 0.8               | 0.899         |
| 2     | 未知  | 11.05       | 99.10        | 244.2       | 85.1              | 99.101        |
| Total |     |             | 100.00       | 247.2       | 85.9              | 100.000       |

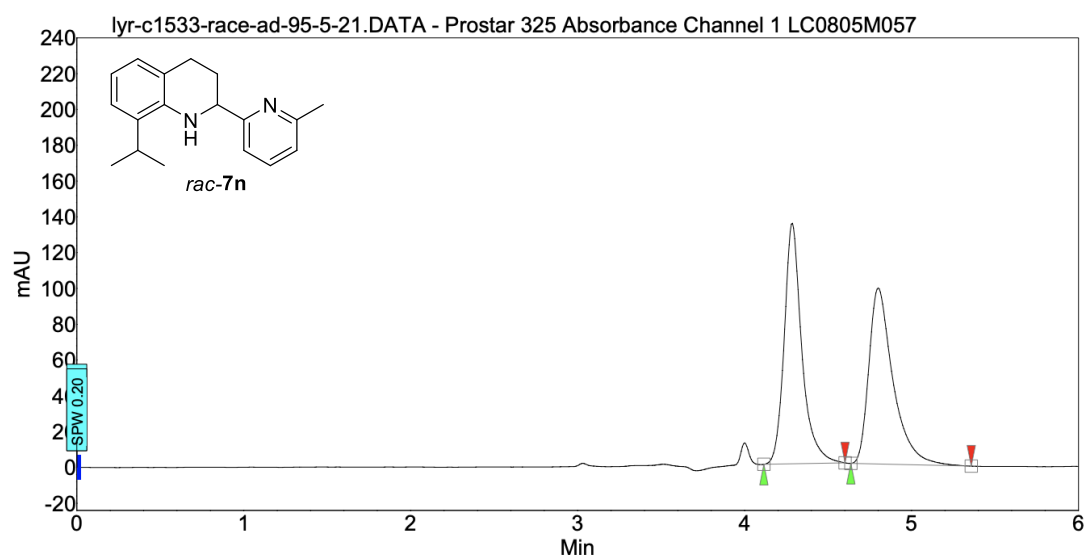

| Index | 文件名 | 时间<br>[Min] | 数量<br>[% 面积] | 高度<br>[mAU] | Area<br>[mAU.Min] | Area %<br>[%] |
|-------|-----|-------------|--------------|-------------|-------------------|---------------|
| 1     | 未知  | 4.29        | 49.89        | 134.5       | 16.4              | 49.892        |
| 2     | 未知  | 4.80        | 50.11        | 98.4        | 16.5              | 50.108        |
| Total |     |             | 100.00       | 232.9       | 32.9              | 100.000       |

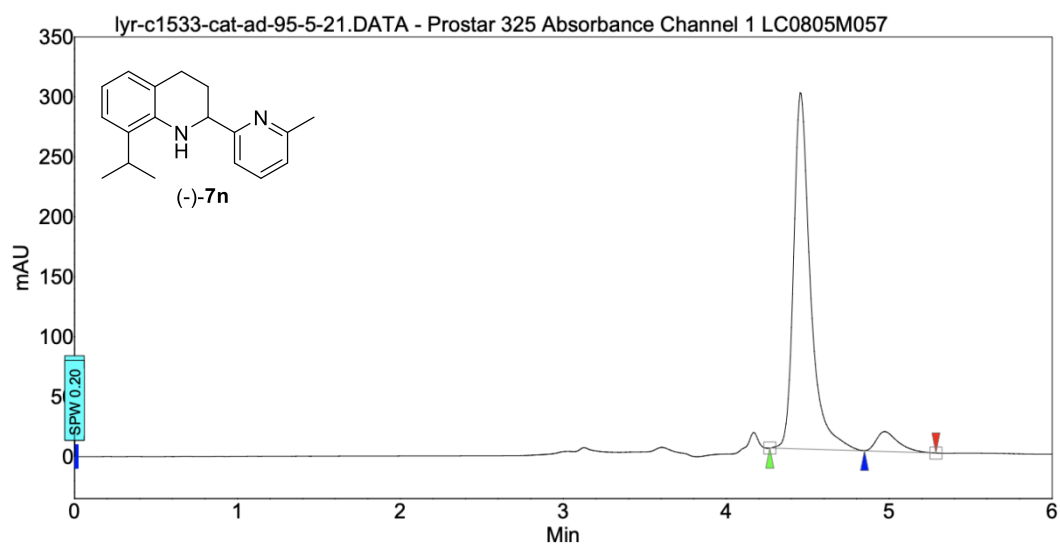

| Index | 文件名 | 时间<br>[Min] | 数量<br>[% 面积] | 高度<br>[mAU] | Area<br>[mAU.Min] | Area %<br>[%] |
|-------|-----|-------------|--------------|-------------|-------------------|---------------|
| 1     | 未知  | 4.45        | 93.25        | 297.1       | 35.6              | 93.250        |
| 2     | 未知  | 4.97        | 6.75         | 16.6        | 2.6               | 6.750         |
| Total |     |             | 100.00       | 313.7       | 38.1              | 100.000       |

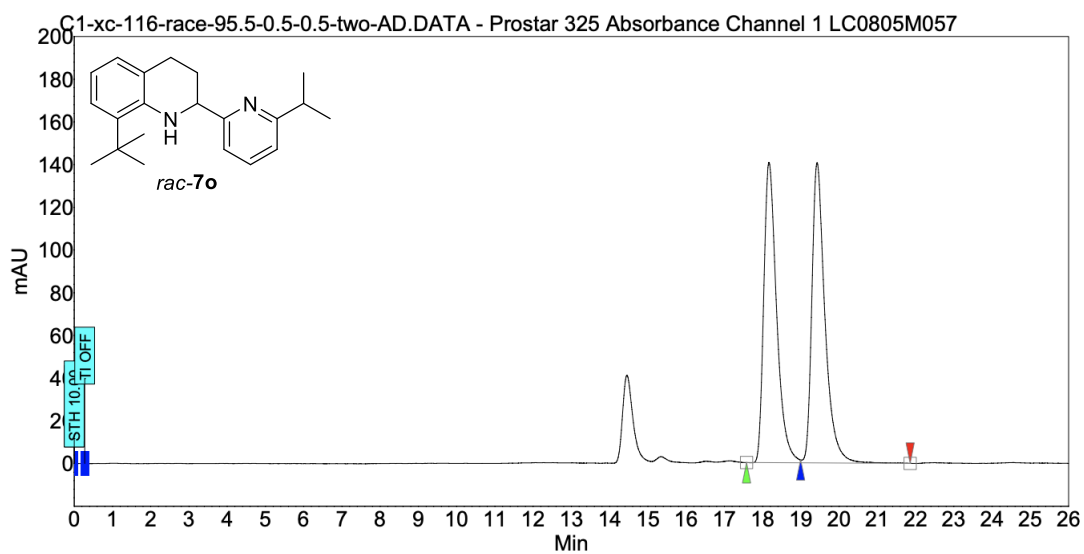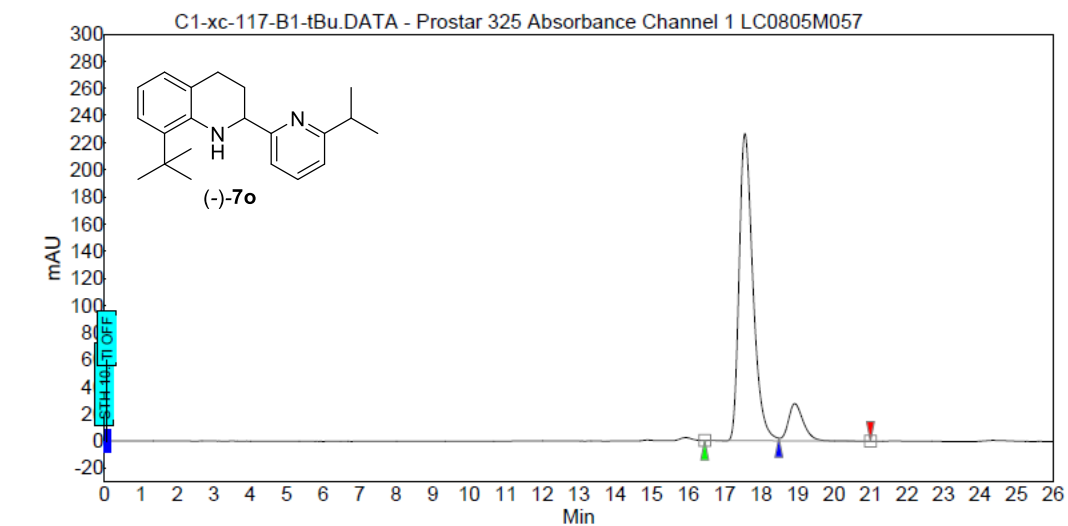

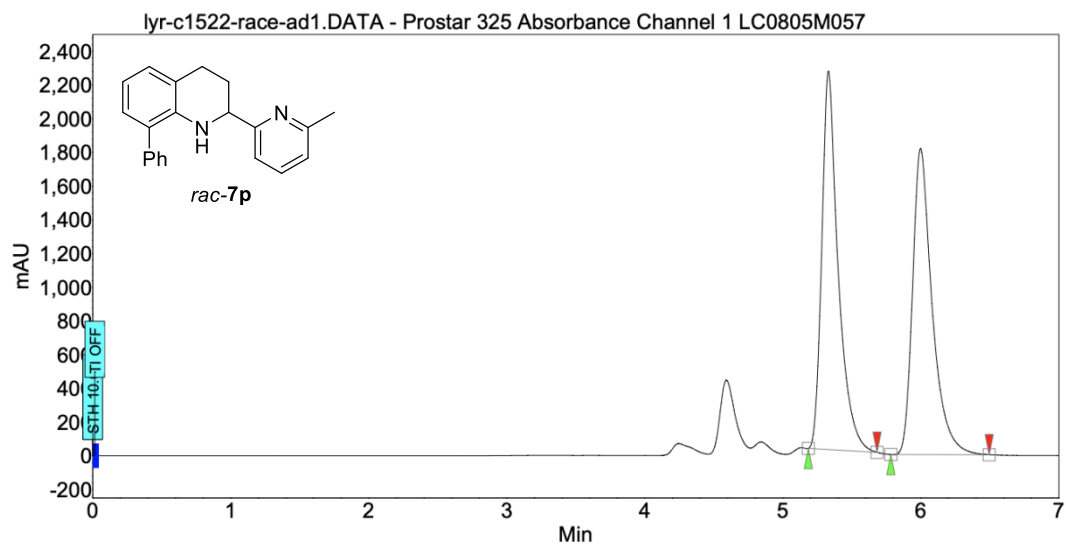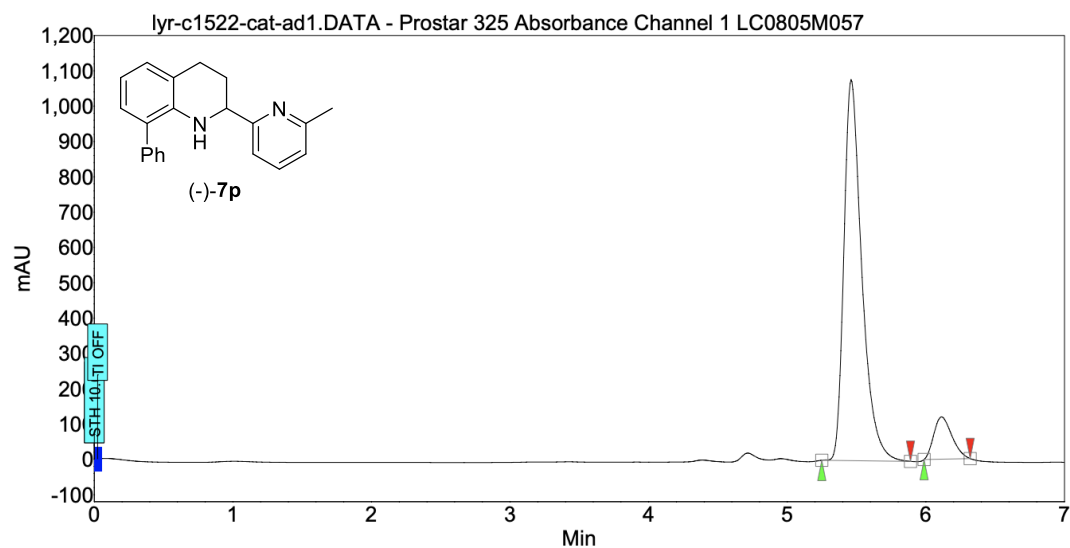

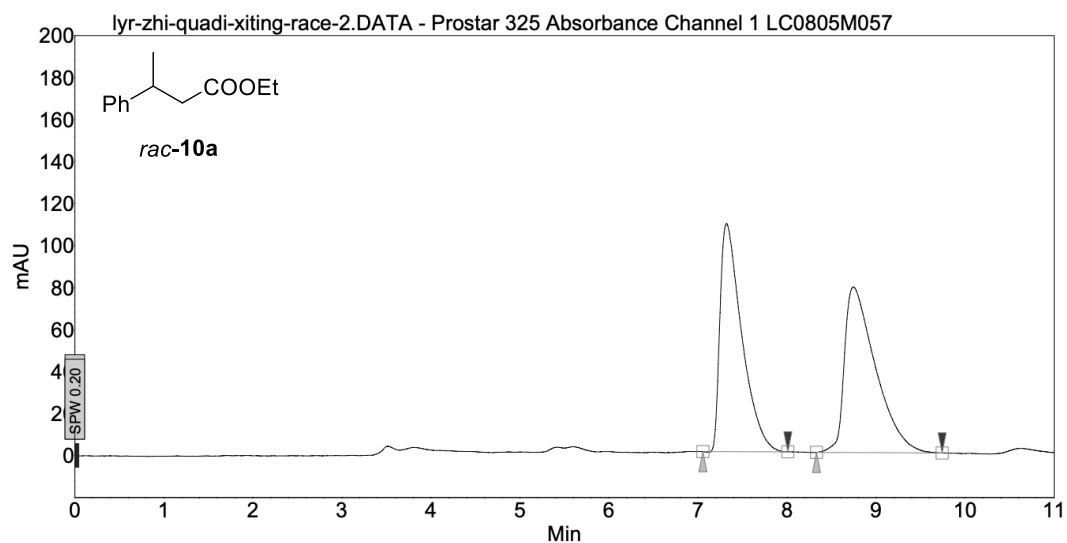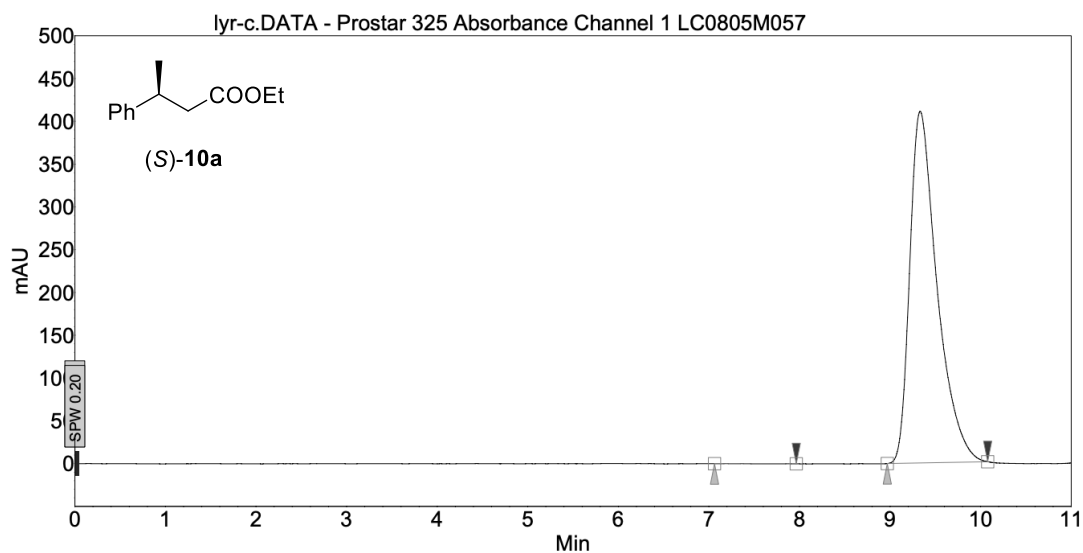

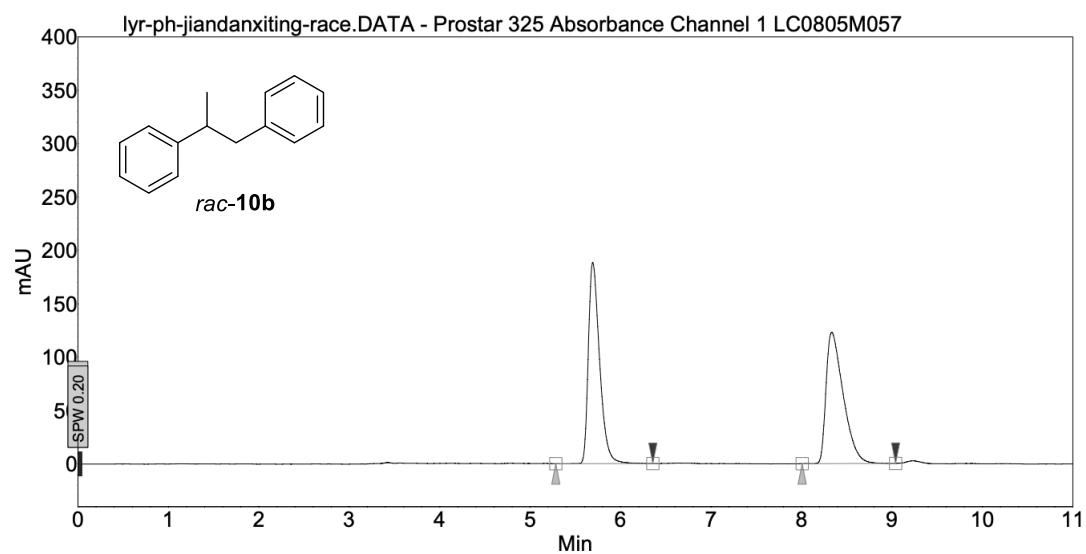

| Index | 文件名 | 时间<br>[Min] | 数量<br>[% 面积] | 高度<br>[mAU] | Area<br>[mAU.Min] | Area %<br>[%] |
|-------|-----|-------------|--------------|-------------|-------------------|---------------|
| 1     | 未知  | 5.69        | 50.09        | 188.6       | 27.1              | 50.095        |
| 2     | 未知  | 8.33        | 49.91        | 123.1       | 27.0              | 49.905        |
| Total |     |             | 100.00       | 311.7       | 54.1              | 100.000       |

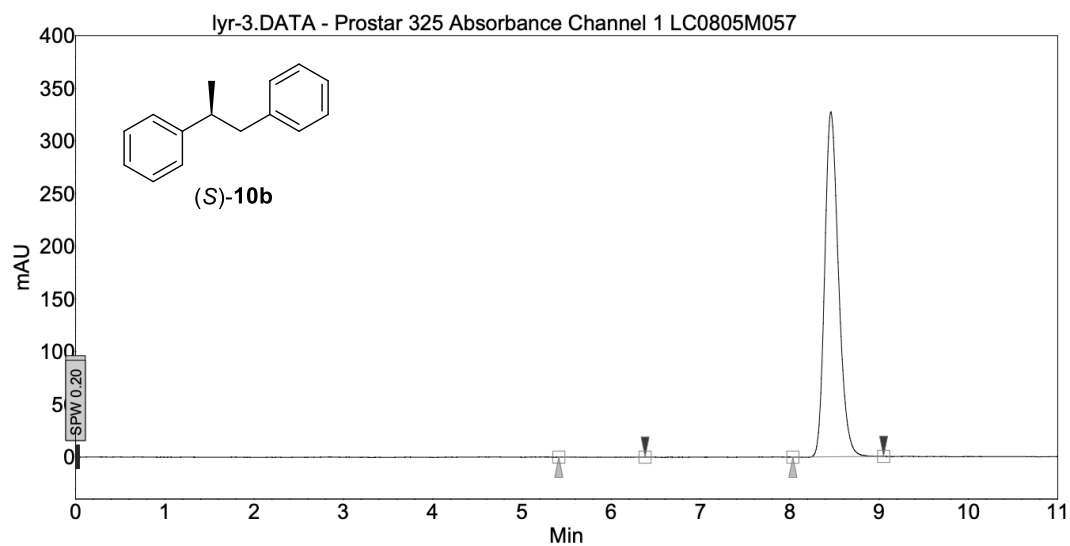

| Index | 文件名 | 时间<br>[Min] | 数量<br>[% 面积] | 高度<br>[mAU] | Area<br>[mAU.Min] | Area %<br>[%] |
|-------|-----|-------------|--------------|-------------|-------------------|---------------|
| 2     | 未知  | 5.49        | 0.03         | 0.2         | 0.0               | 0.032         |
| 1     | 未知  | 8.46        | 99.97        | 327.5       | 58.6              | 99.968        |
| Total |     |             | 100.00       | 327.7       | 58.6              | 100.000       |



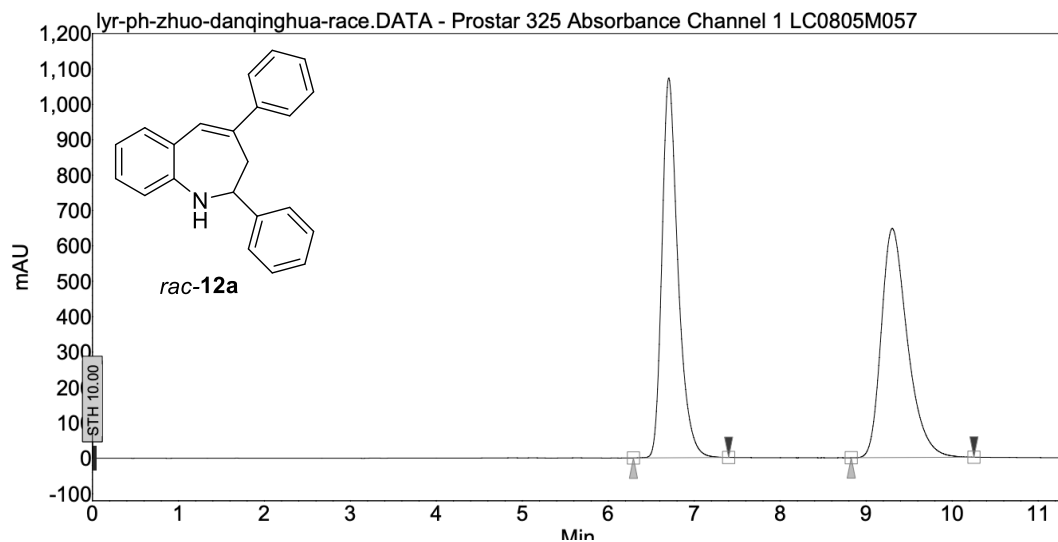

| Index | 文件名 | 时间<br>[Min] | 数量<br>[% 面积] | 高度<br>[mAU] | Area<br>[mAU.Min] | Area %<br>[%] |
|-------|-----|-------------|--------------|-------------|-------------------|---------------|
| 1     | 未知  | 6.71        | 50.38        | 1073.3      | 231.7             | 50.382        |
| 2     | 未知  | 9.31        | 49.62        | 647.1       | 228.2             | 49.618        |
| Total |     |             | 100.00       | 1720.4      | 459.9             | 100.000       |

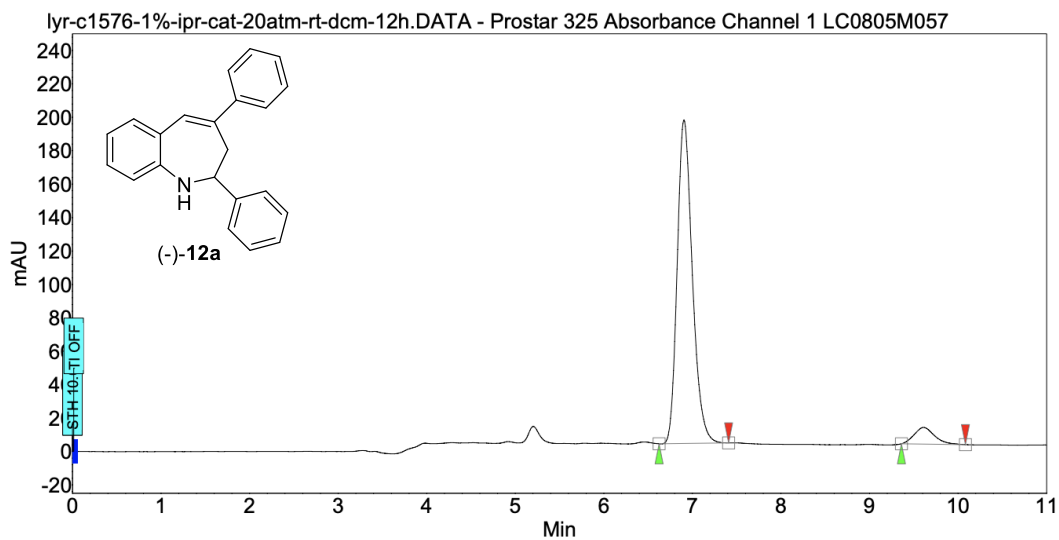

| Index | 文件名 | 时间<br>[Min] | 数量<br>[% 面积] | 高度<br>[mAU] | Area<br>[mAU.Min] | Area %<br>[%] |
|-------|-----|-------------|--------------|-------------|-------------------|---------------|
| 1     | 未知  | 6.91        | 93.54        | 193.7       | 38.4              | 93.539        |
| 2     | 未知  | 9.61        | 6.46         | 9.9         | 2.6               | 6.461         |
| Total |     |             | 100.00       | 203.6       | 41.0              | 100.000       |

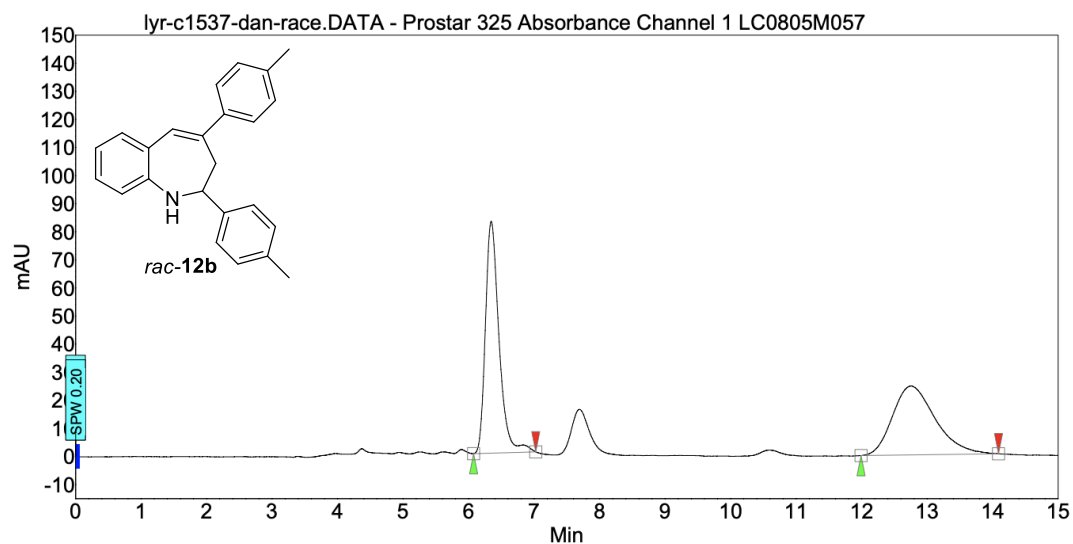

| Index | 文件名 | 时间<br>[Min] | 数量<br>[% 面积] | 高度<br>[mAU] | Area<br>[mAU.Min] | Area %<br>[%] |
|-------|-----|-------------|--------------|-------------|-------------------|---------------|
| 2     | 未知  | 6.35        | 51.83        | 82.5        | 19.9              | 51.831        |
| 1     | 未知  | 12.75       | 48.17        | 24.5        | 18.5              | 48.169        |
| Total |     |             | 100.00       | 107.0       | 38.4              | 100.000       |

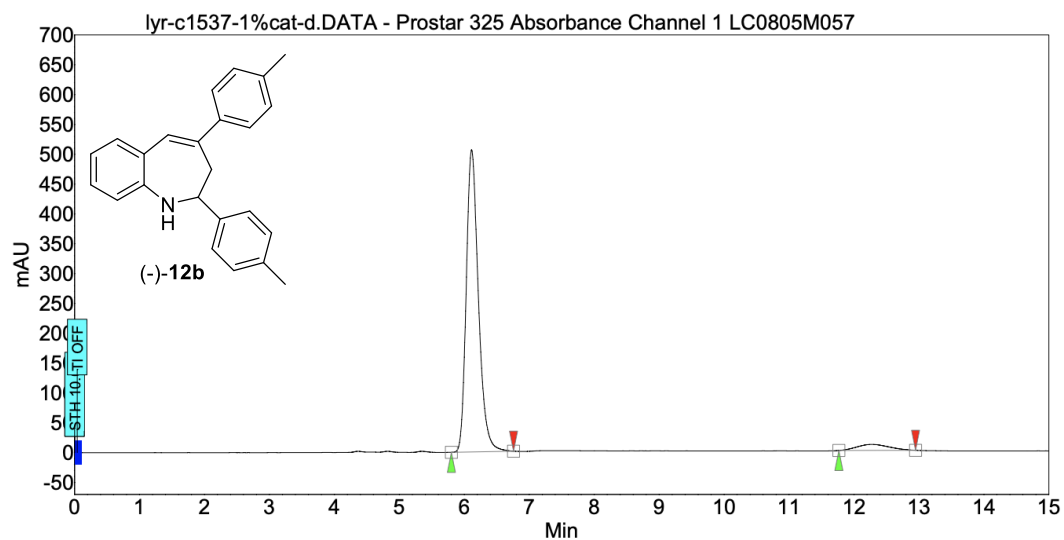

| Index | 文件名 | 时间<br>[Min] | 数量<br>[% 面积] | 高度<br>[mAU] | Area<br>[mAU.Min] | Area %<br>[%] |
|-------|-----|-------------|--------------|-------------|-------------------|---------------|
| 1     | 未知  | 6.11        | 95.03        | 506.4       | 109.5             | 95.027        |
| 2     | 未知  | 12.27       | 4.97         | 10.0        | 5.7               | 4.973         |
| Total |     |             | 100.00       | 516.5       | 115.2             | 100.000       |

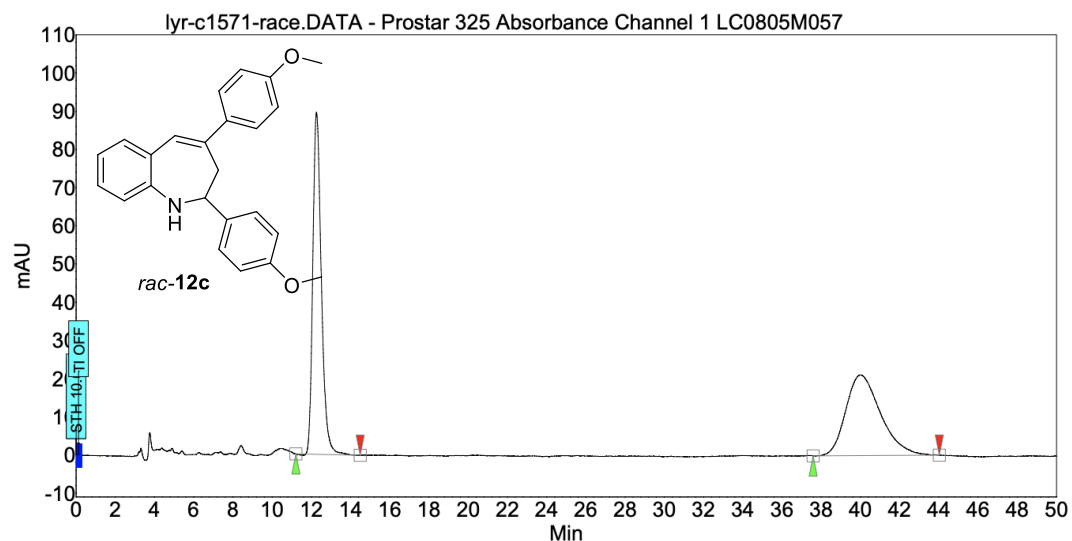

| Index | 文件名 | 时间<br>[Min] | 数量<br>[% 面积] | 高度<br>[mAU] | Area<br>[mAU.Min] | Area %<br>[%] |
|-------|-----|-------------|--------------|-------------|-------------------|---------------|
| 2     | 未知  | 12.26       | 50.95        | 89.5        | 45.0              | 50.953        |
| 1     | 未知  | 39.99       | 49.05        | 21.1        | 43.3              | 49.047        |
| Total |     |             | 100.00       | 110.6       | 88.4              | 100.000       |

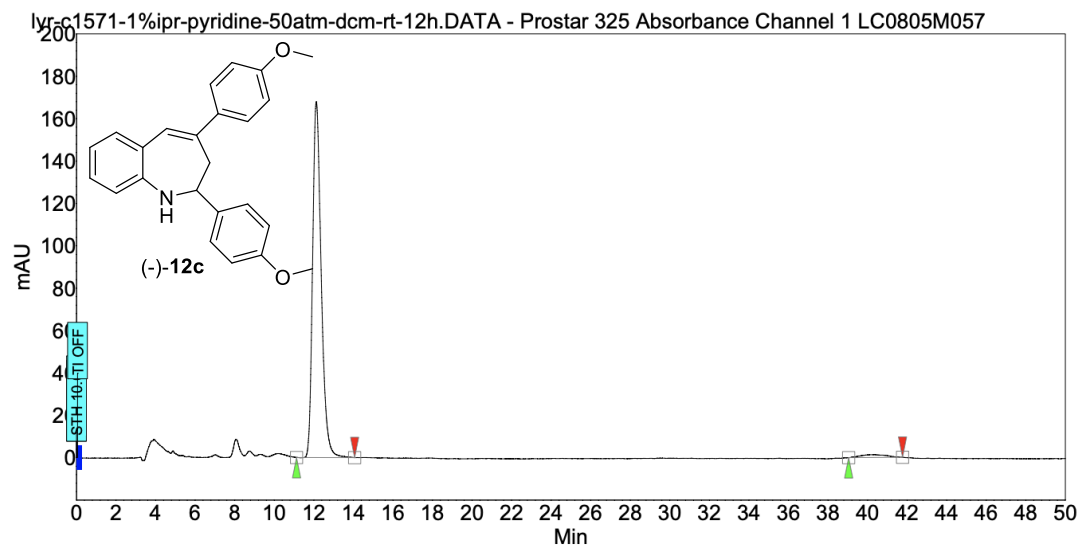

| Index | 文件名 | 时间<br>[Min] | 数量<br>[% 面积] | 高度<br>[mAU] | Area<br>[mAU.Min] | Area %<br>[%] |
|-------|-----|-------------|--------------|-------------|-------------------|---------------|
| 1     | 未知  | 12.13       | 97.71        | 167.9       | 84.6              | 97.713        |
| 2     | 未知  | 40.13       | 2.29         | 1.3         | 2.0               | 2.287         |
| Total |     |             | 100.00       | 169.2       | 86.6              | 100.000       |

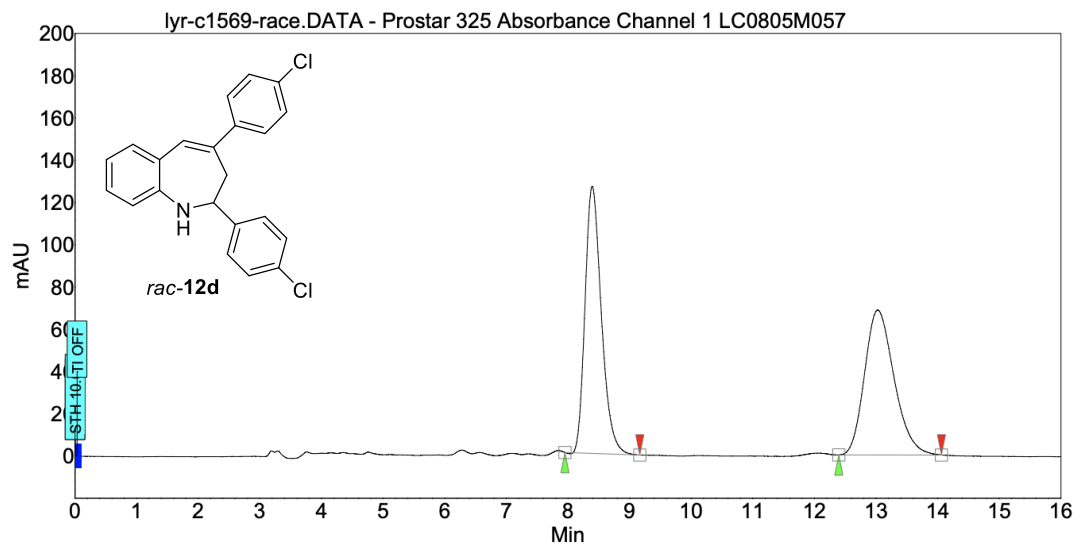

| Index | 文件名 | 时间<br>[Min] | 数量<br>[% 面积] | 高度<br>[mAU] | Area<br>[mAU.Min] | Area %<br>[%] |
|-------|-----|-------------|--------------|-------------|-------------------|---------------|
| 1     | 未知  | 8.39        | 50.49        | 126.5       | 38.8              | 50.493        |
| 2     | 未知  | 13.03       | 49.51        | 68.6        | 38.1              | 49.507        |
| Total |     |             | 100.00       | 195.1       | 76.9              | 100.000       |

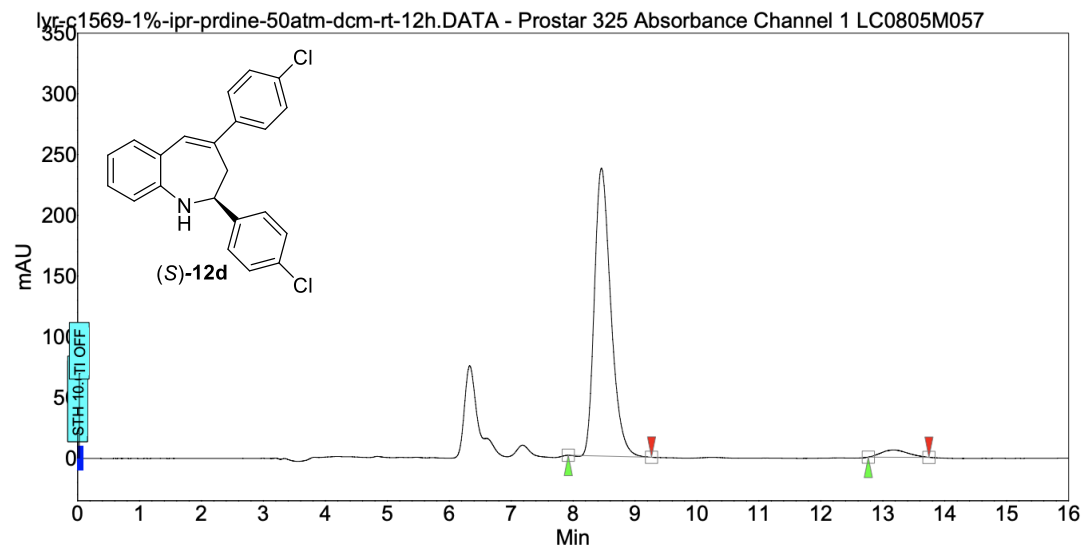

| Index | 文件名 | 时间<br>[Min] | 数量<br>[% 面积] | 高度<br>[mAU] | Area<br>[mAU.Min] | Area %<br>[%] |
|-------|-----|-------------|--------------|-------------|-------------------|---------------|
| 2     | 未知  | 8.46        | 96.05        | 237.0       | 72.7              | 96.052        |
| 1     | 未知  | 13.17       | 3.95         | 6.0         | 3.0               | 3.948         |
| Total |     |             | 100.00       | 243.0       | 75.7              | 100.000       |

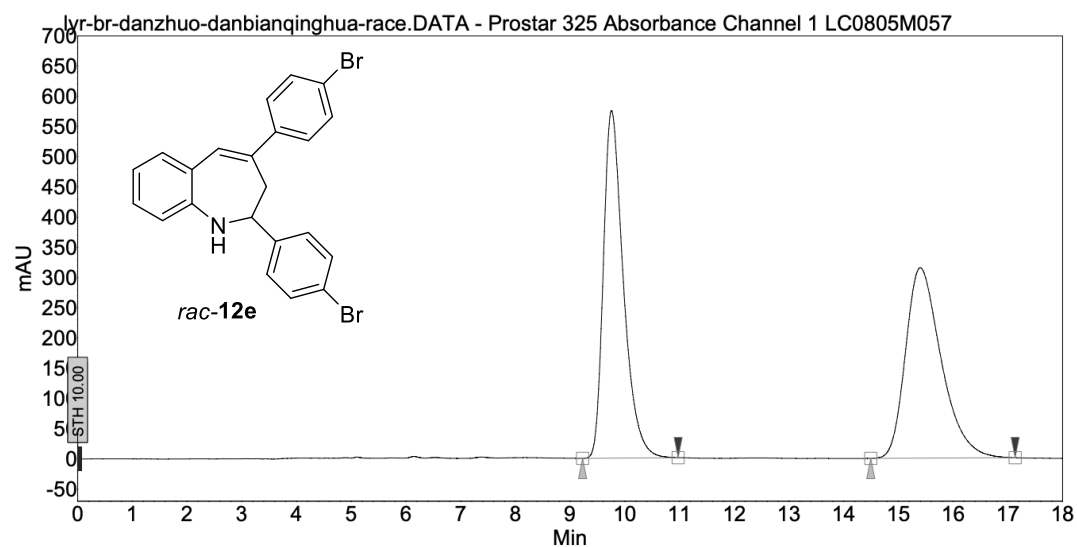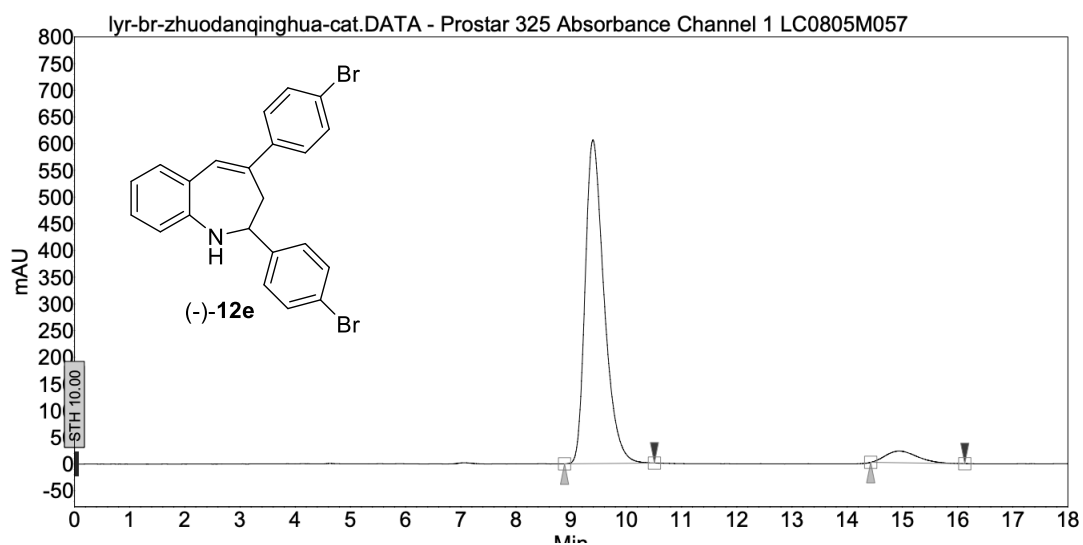

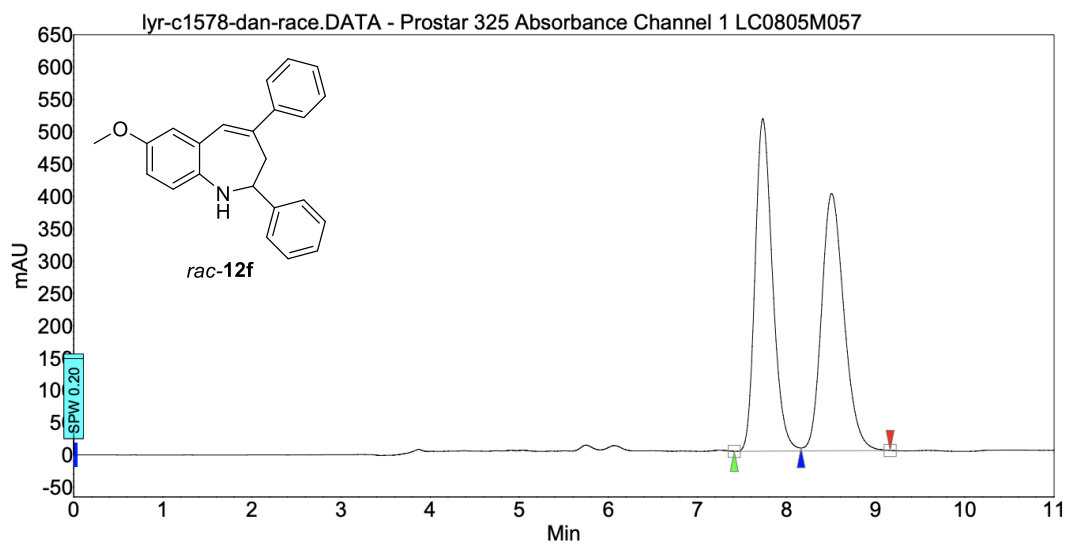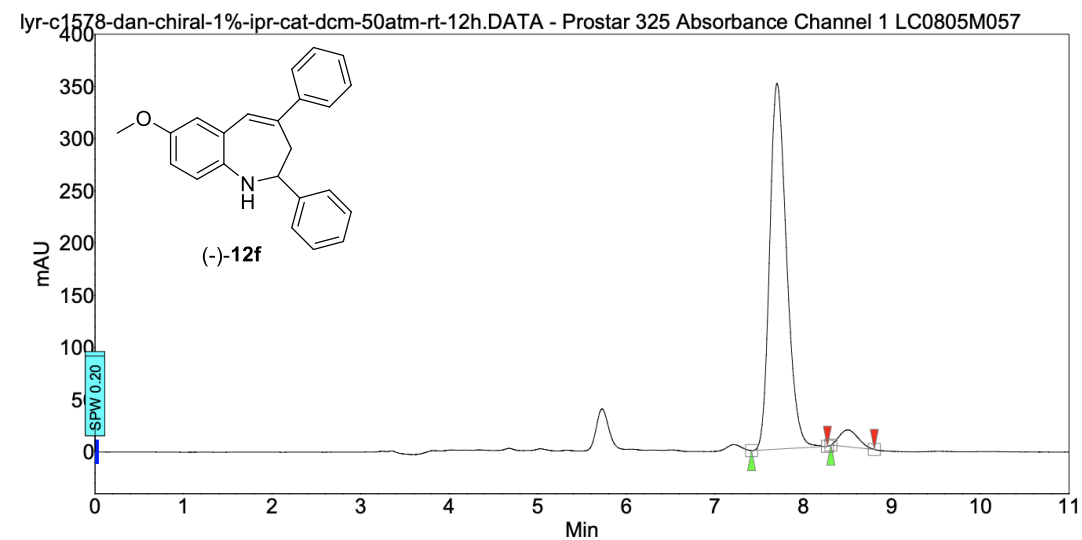

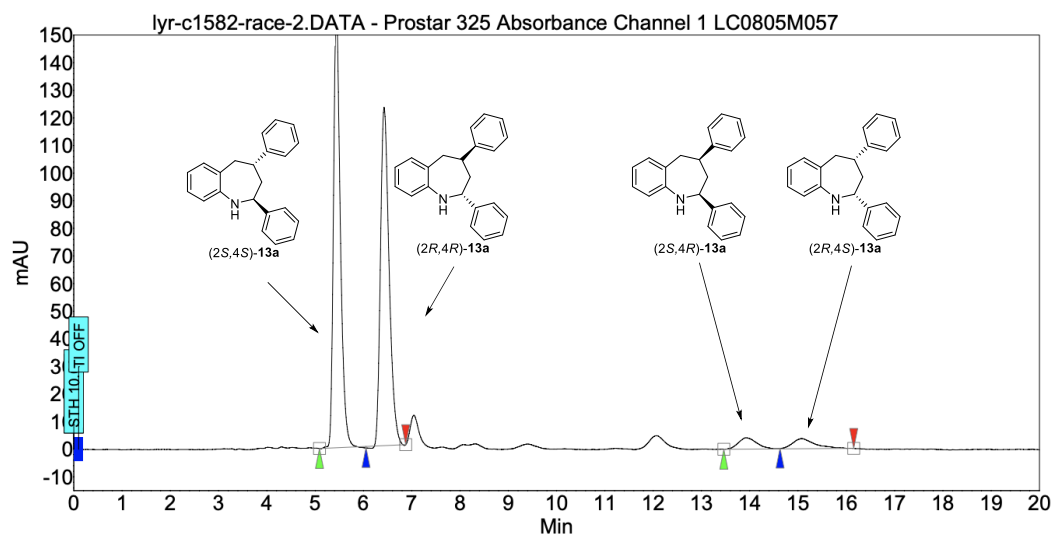

| Index | 文件名 | 时间<br>[Min] | 数量<br>[% 面积] | 高度<br>[mAU] | Area<br>[mAU.Min] | Area %<br>[%] |
|-------|-----|-------------|--------------|-------------|-------------------|---------------|
| 1     | 未知  | 5.44        | 47.30        | 159.0       | 26.1              | 47.296        |
| 2     | 未知  | 6.43        | 45.86        | 122.5       | 25.3              | 45.861        |
| 3     | 未知  | 13.93       | 3.26         | 4.1         | 1.8               | 3.256         |
| 4     | 未知  | 15.07       | 3.59         | 3.7         | 2.0               | 3.587         |
| Total |     |             | 100.00       | 289.3       | 55.2              | 100.000       |

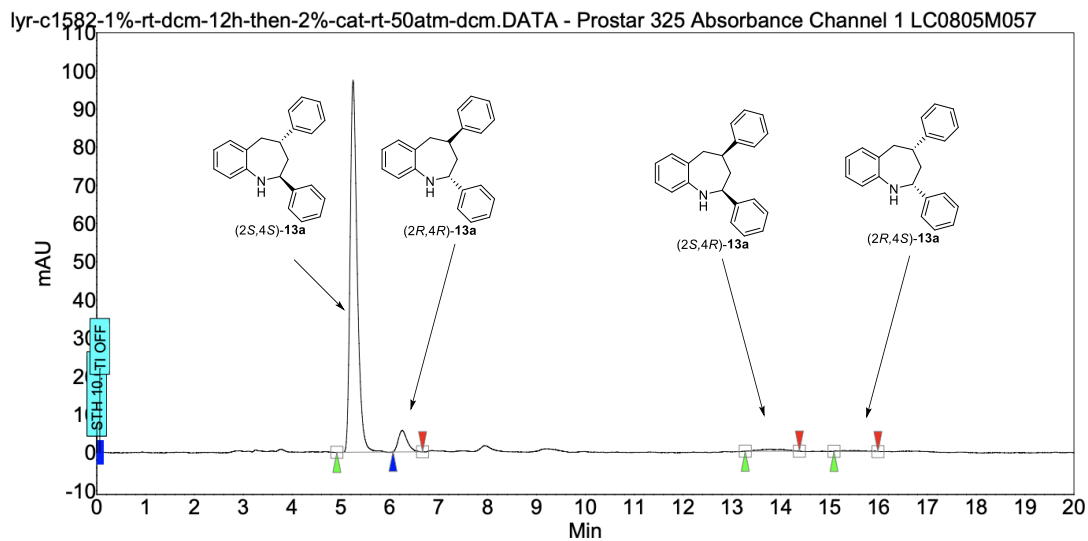

| Index | 文件名 | 时间<br>[Min] | 数量<br>[% 面积] | 高度<br>[mAU] | Area<br>[mAU.Min] | Area %<br>[%] |
|-------|-----|-------------|--------------|-------------|-------------------|---------------|
| 1     | 未知  | 5.25        | 90.82        | 97.5        | 16.4              | 90.818        |
| 2     | 未知  | 6.25        | 6.71         | 5.6         | 1.2               | 6.710         |
| 3     | 未知  | 13.79       | 1.80         | 0.5         | 0.3               | 1.798         |
| 4     | 未知  | 15.50       | 0.67         | 0.2         | 0.1               | 0.674         |
| Total |     |             | 100.00       | 103.9       | 18.0              | 100.000       |

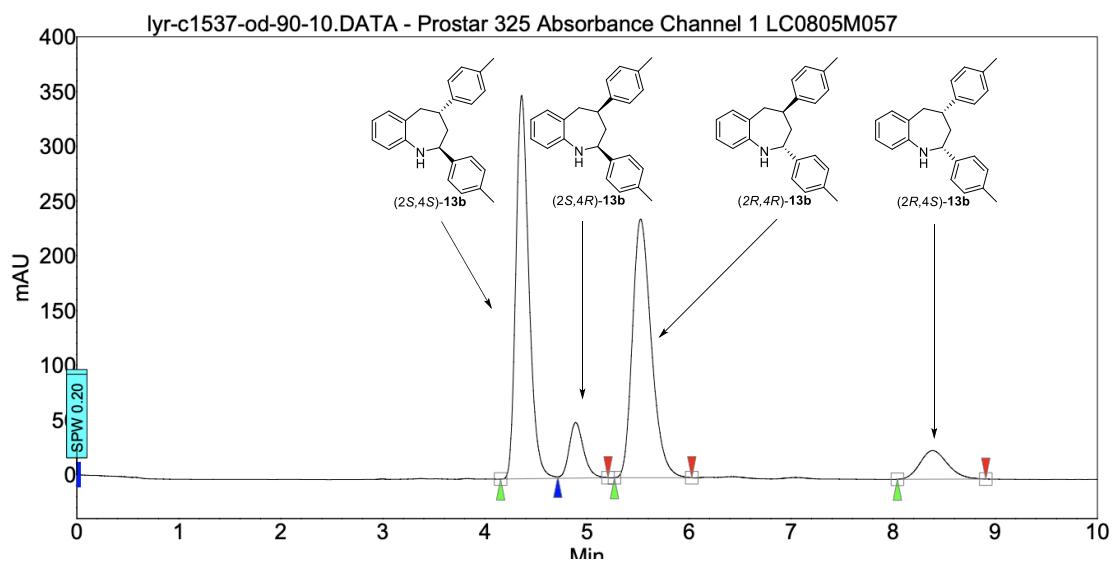

| Index | 文件名 | 时间<br>[Min] | 数量<br>[% 面积] | 高度<br>[mAU] | Area<br>[mAU.Min] | Area %<br>[%] |
|-------|-----|-------------|--------------|-------------|-------------------|---------------|
| 1     | 未知  | 4.36        | 43.51        | 350.3       | 51.8              | 43.508        |
| 4     | 未知  | 4.89        | 6.95         | 50.9        | 8.3               | 6.953         |
| 2     | 未知  | 5.53        | 42.64        | 236.2       | 50.8              | 42.642        |
| 3     | 未知  | 8.39        | 6.90         | 26.1        | 8.2               | 6.897         |
| Total |     |             | 100.00       | 663.5       | 119.1             | 100.000       |

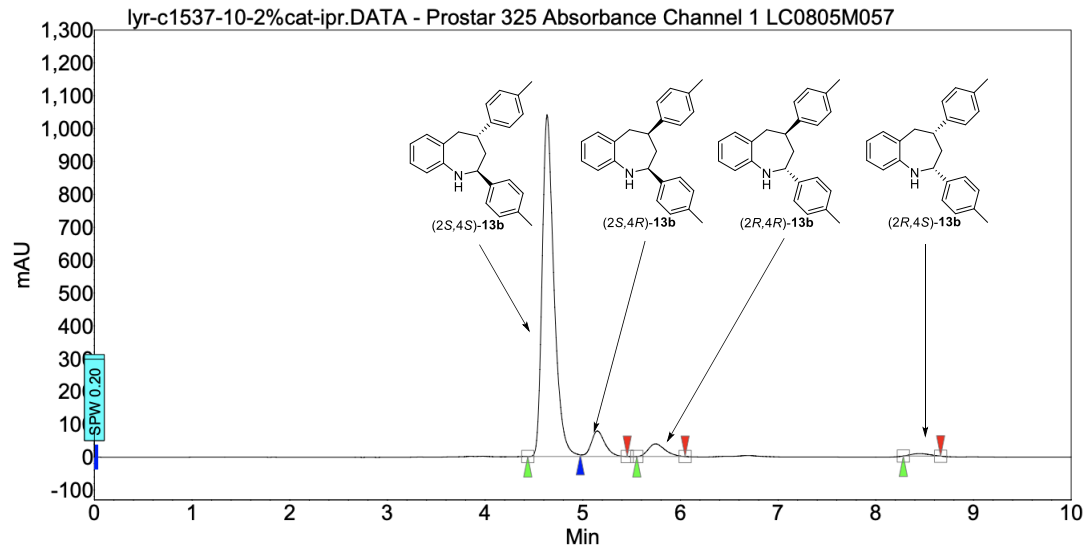

| Index | 文件名 | 时间<br>[Min] | 数量<br>[% 面积] | 高度<br>[mAU] | Area<br>[mAU.Min] | Area %<br>[%] |
|-------|-----|-------------|--------------|-------------|-------------------|---------------|
| 1     | 未知  | 4.63        | 86.80        | 1040.3      | 145.1             | 86.800        |
| 4     | 未知  | 5.15        | 7.60         | 77.9        | 12.7              | 7.602         |
| 2     | 未知  | 5.75        | 4.61         | 38.6        | 7.7               | 4.612         |
| 3     | 未知  | 8.45        | 0.99         | 7.5         | 1.6               | 0.986         |
| Total |     |             | 100.00       | 1164.3      | 167.1             | 100.000       |



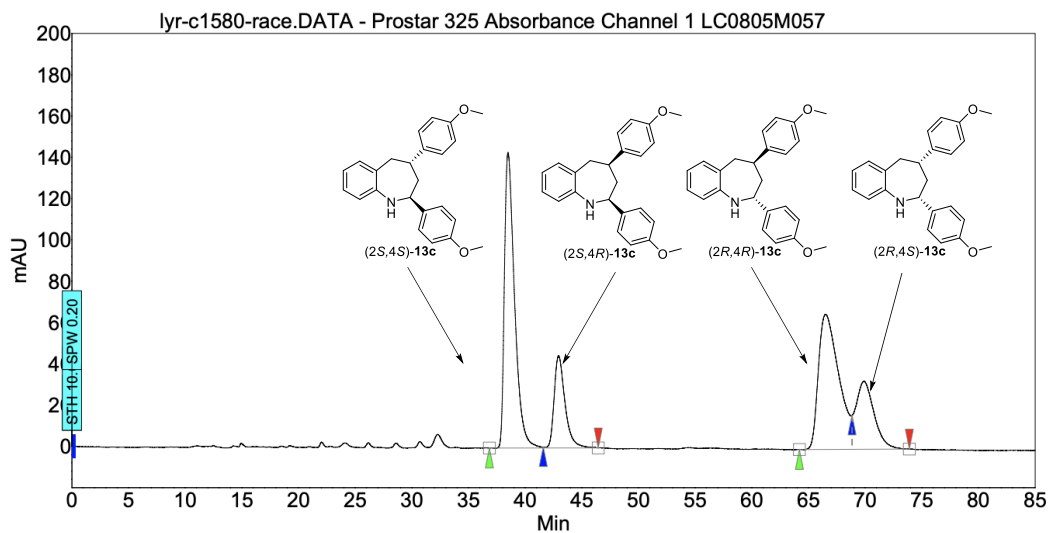

| Index | 文件名 | 时间<br>[Min] | 数量<br>[% 面积] | 高度<br>[mAU] | Area<br>[mAU.Min] | Area %<br>[%] |
|-------|-----|-------------|--------------|-------------|-------------------|---------------|
| 1     | 未知  | 38.48       | 37.54        | 143.1       | 148.4             | 37.536        |
| 2     | 未知  | 42.95       | 12.55        | 44.6        | 49.6              | 12.550        |
| 3     | 未知  | 66.51       | 34.44        | 65.4        | 136.1             | 34.438        |
| 4     | 未知  | 69.91       | 15.48        | 32.9        | 61.2              | 15.476        |
| Total |     |             | 100.00       | 286.0       | 395.3             | 100.000       |

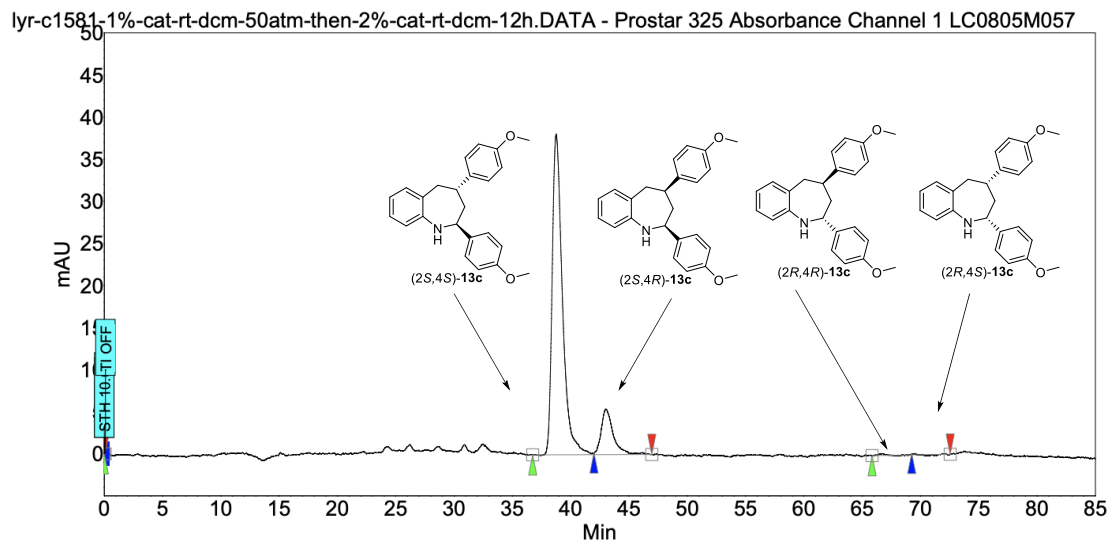

| Index | 文件名 | 时间<br>[Min] | 数量<br>[% 面积] | 高度<br>[mAU] | Area<br>[mAU.Min] | Area %<br>[%] |
|-------|-----|-------------|--------------|-------------|-------------------|---------------|
| 1     | 未知  | 38.75       | 85.29        | 38.1        | 38.8              | 85.293        |
| 2     | 未知  | 43.03       | 14.40        | 5.4         | 6.5               | 14.395        |
| 3     | 未知  | 66.64       | 0.18         | 0.2         | 0.1               | 0.179         |
| 4     | 未知  | 70.78       | 0.13         | 0.2         | 0.1               | 0.133         |
| Total |     |             | 100.00       | 43.9        | 45.5              | 100.000       |

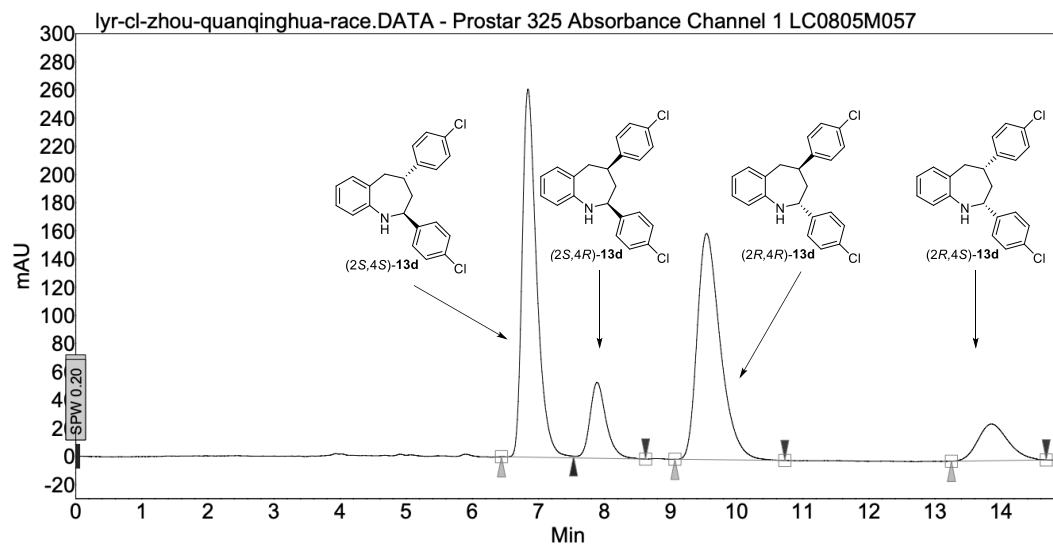

| Index | 文件名 | 时间<br>[Min] | 数量<br>[% 面积] | 高度<br>[mAU] | Area<br>[mAU.Min] | Area %<br>[%] |
|-------|-----|-------------|--------------|-------------|-------------------|---------------|
| 2     | 未知  | 6.84        | 41.23        | 261.3       | 66.2              | 41.229        |
| 3     | 未知  | 7.89        | 9.56         | 53.9        | 15.3              | 9.559         |
| 1     | 未知  | 9.54        | 40.59        | 160.4       | 65.1              | 40.591        |
| 4     | 未知  | 13.85       | 8.62         | 26.0        | 13.8              | 8.621         |
| Total |     |             | 100.00       | 501.7       | 160.5             | 100.000       |

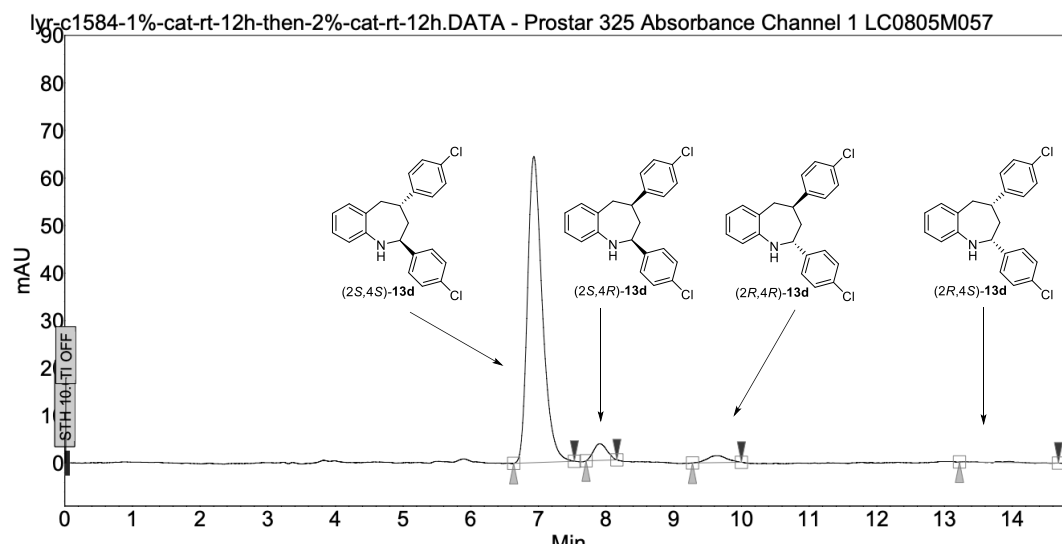

| Index | 文件名 | 时间<br>[Min] | 数量<br>[% 面积] | 高度<br>[mAU] | Area<br>[mAU.Min] | Area %<br>[%] |
|-------|-----|-------------|--------------|-------------|-------------------|---------------|
| 1     | 未知  | 6.93        | 92.39        | 64.4        | 16.3              | 92.394        |
| 2     | 未知  | 7.91        | 4.56         | 3.5         | 0.8               | 4.563         |
| 3     | 未知  | 9.62        | 2.79         | 1.4         | 0.5               | 2.790         |
| 4     | 未知  | 13.96       | 0.25         | 0.2         | 0.0               | 0.253         |
| Total |     |             | 100.00       | 69.6        | 17.7              | 100.000       |

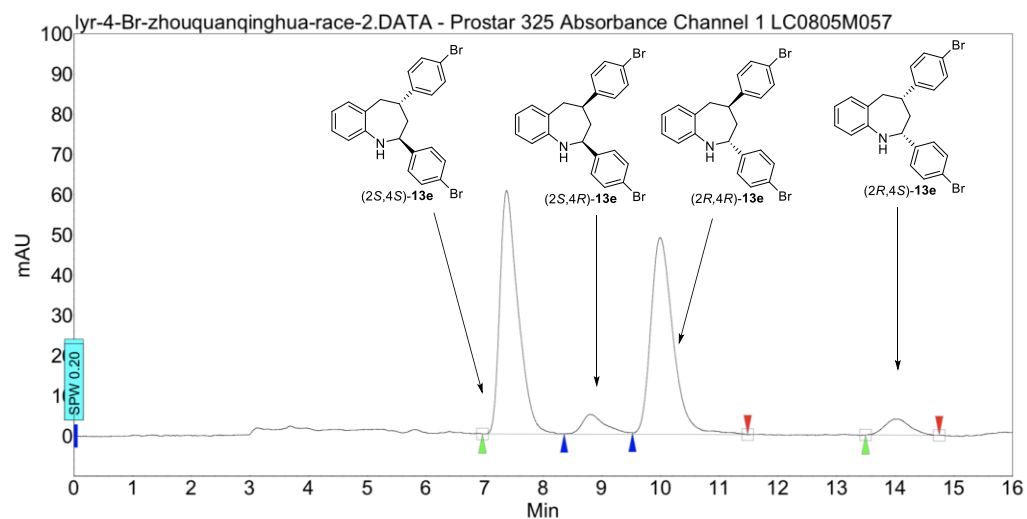

| Index | 文件名 | 时间<br>[Min] | 数量<br>[% 面积] | 高度<br>[mAU] | Area<br>[mAU.Min] | Area %<br>[%] |
|-------|-----|-------------|--------------|-------------|-------------------|---------------|
| 2     | 未知  | 7.37        | 45.72        | 60.6        | 21.8              | 45.717        |
| 3     | 未知  | 8.80        | 4.78         | 4.9         | 2.3               | 4.784         |
| 4     | 未知  | 9.99        | 45.21        | 49.0        | 21.6              | 45.212        |
| 1     | 未知  | 14.05       | 4.29         | 4.0         | 2.0               | 4.287         |
| Total |     |             | 100.00       | 118.5       | 47.7              | 100.000       |

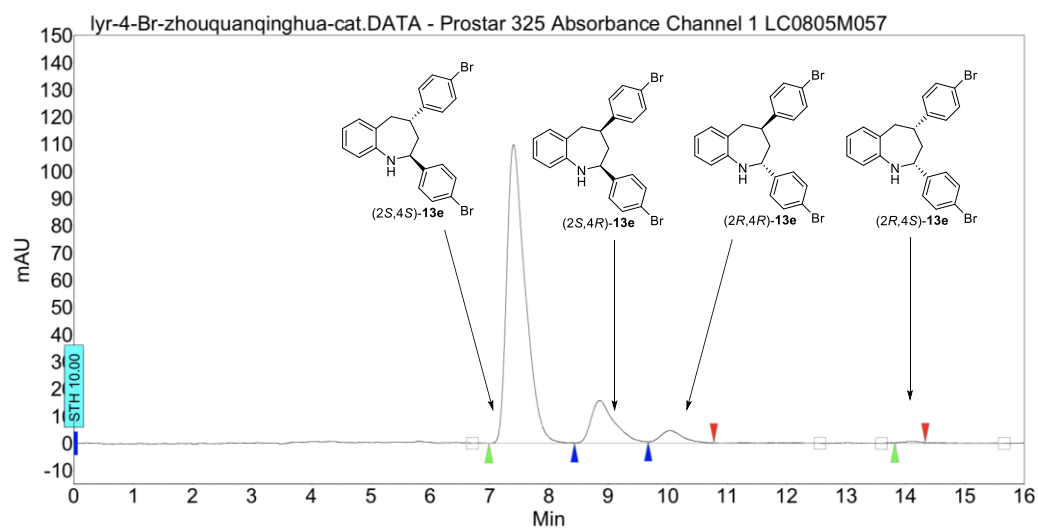

| Index | 文件名 | 时间<br>[Min] | 数量<br>[% 面积] | 高度<br>[mAU] | Area<br>[mAU.Min] | Area %<br>[%] |
|-------|-----|-------------|--------------|-------------|-------------------|---------------|
| 1     | 未知  | 7.40        | 80.49        | 109.9       | 39.7              | 80.487        |
| 2     | 未知  | 8.85        | 14.63        | 15.8        | 7.2               | 14.629        |
| 3     | 未知  | 10.03       | 4.32         | 4.7         | 2.1               | 4.318         |
| 4     | 未知  | 14.11       | 0.57         | 0.7         | 0.3               | 0.565         |
| Total |     |             | 100.00       | 131.1       | 49.3              | 100.000       |

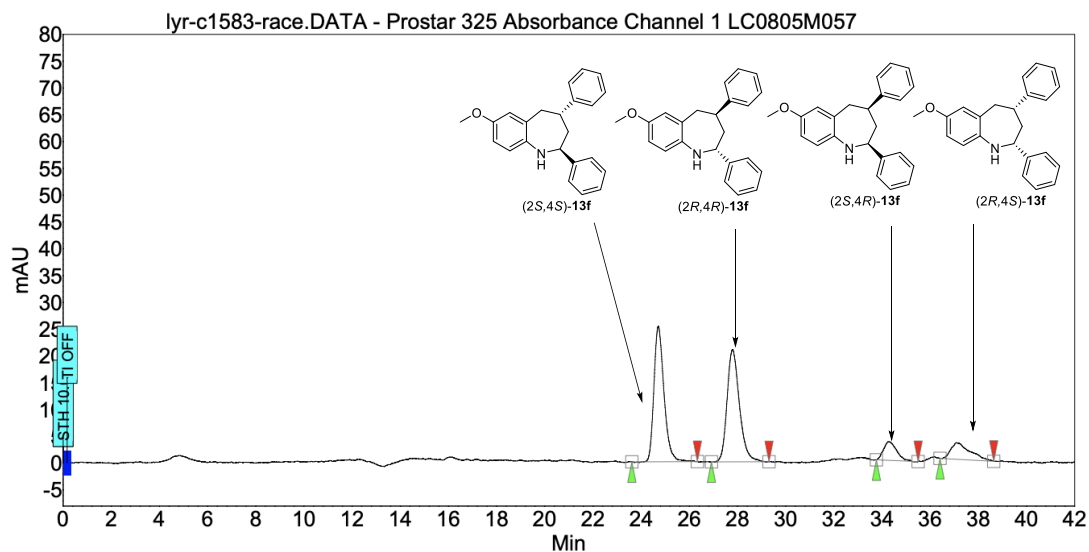

| Index | 文件名 | 时间 [Min] | 数量 [% 面积] | 高度 [mAU] | Area [mAU.Min] | Area % [%] |
|-------|-----|----------|-----------|----------|----------------|------------|
| 1     | 未知  | 24.71    | 41.14     | 25.3     | 12.2           | 41.141     |
| 2     | 未知  | 27.79    | 41.85     | 20.9     | 12.4           | 41.847     |
| 3     | 未知  | 34.27    | 7.30      | 3.5      | 2.2            | 7.299      |
| 4     | 未知  | 37.09    | 9.71      | 3.1      | 2.9            | 9.713      |
| Total |     |          | 100.00    | 52.8     | 29.7           | 100.000    |

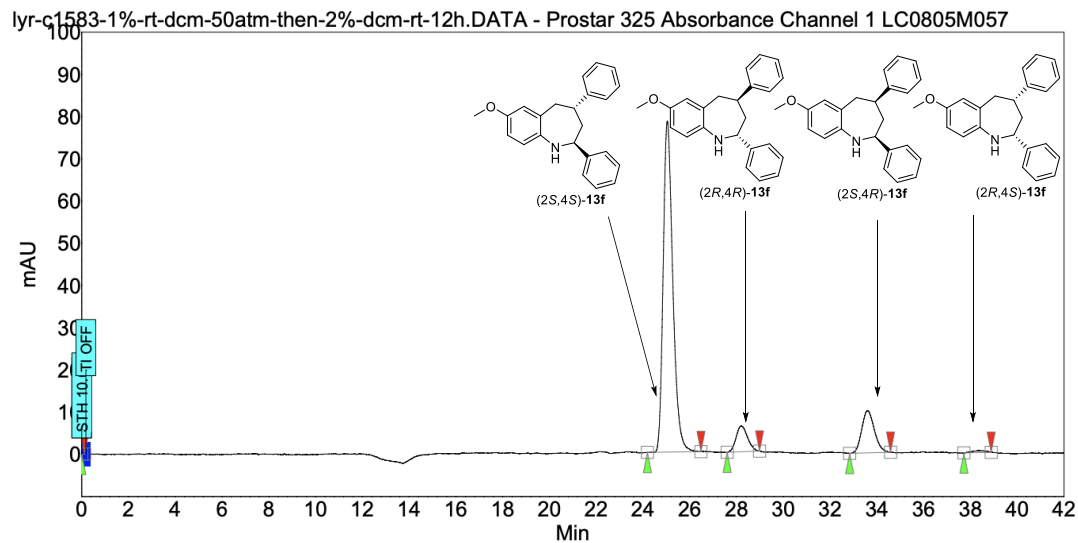

| Index | 文件名 | 时间 [Min] | 数量 [% 面积] | 高度 [mAU] | Area [mAU.Min] | Area % [%] |
|-------|-----|----------|-----------|----------|----------------|------------|
| 1     | 未知  | 25.03    | 78.85     | 78.4     | 37.3           | 78.852     |
| 2     | 未知  | 28.20    | 7.28      | 6.1      | 3.4            | 7.278      |
| 3     | 未知  | 33.60    | 13.20     | 10.0     | 6.2            | 13.199     |
| 4     | 未知  | 38.31    | 0.67      | 0.5      | 0.3            | 0.671      |
| Total |     |          | 100.00    | 95.0     | 47.3           | 100.000    |

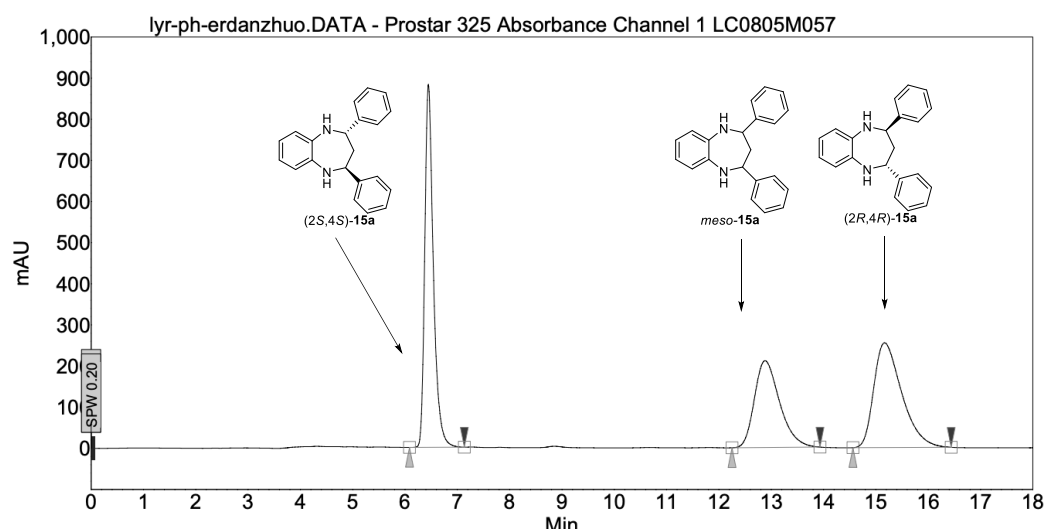

| Index | 文件名 | 时间<br>[Min] | 数量<br>[% 面积] | 高度<br>[mAU] | Area<br>[mAU.Min] | Area %<br>[%] |
|-------|-----|-------------|--------------|-------------|-------------------|---------------|
| 1     | 未知  | 6.45        | 37.89        | 882.6       | 168.0             | 37.890        |
| 2     | 未知  | 12.88       | 26.54        | 211.1       | 117.7             | 26.541        |
| 3     | 未知  | 15.17       | 35.57        | 254.7       | 157.8             | 35.570        |
| Total |     |             | 100.00       | 1348.4      | 443.5             | 100.000       |

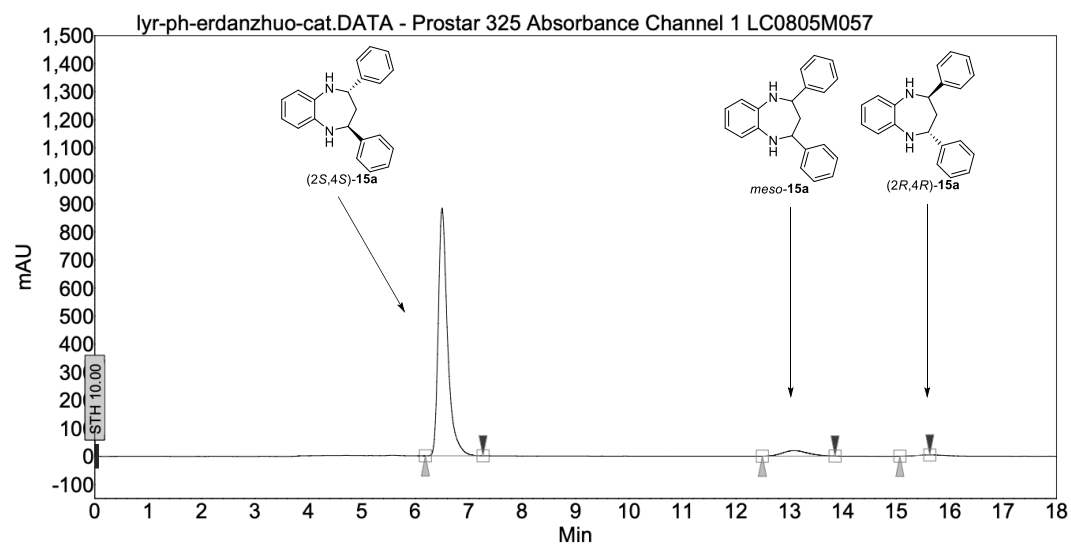

| Index | 文件名 | 时间<br>[Min] | 数量<br>[% 面积] | 高度<br>[mAU] | Area<br>[mAU.Min] | Area %<br>[%] |
|-------|-----|-------------|--------------|-------------|-------------------|---------------|
| 1     | 未知  | 6.50        | 94.13        | 883.0       | 177.7             | 94.133        |
| 2     | 未知  | 13.08       | 5.81         | 19.8        | 11.0              | 5.812         |
| 3     | 未知  | 15.24       | 0.05         | 0.7         | 0.1               | 0.055         |
| Total |     |             | 100.00       | 903.5       | 188.8             | 100.000       |

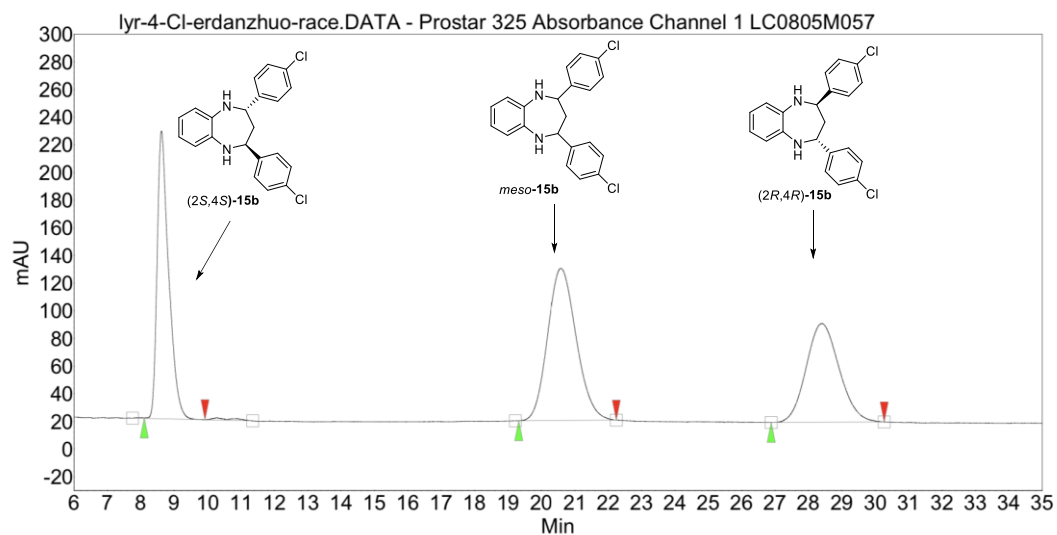

| Index | 文件名 | 时间<br>[Min] | 数量<br>[% 面积] | 高度<br>[mAU] | Area<br>[mAU.Min] | Area %<br>[%] |
|-------|-----|-------------|--------------|-------------|-------------------|---------------|
| 1     | 未知  | 8.61        | 30.41        | 208.1       | 83.4              | 30.406        |
| 2     | 未知  | 20.58       | 39.83        | 109.9       | 109.3             | 39.832        |
| 3     | 未知  | 28.40       | 29.76        | 71.3        | 81.6              | 29.762        |
| Total |     |             | 100.00       | 389.3       | 274.3             | 100.000       |

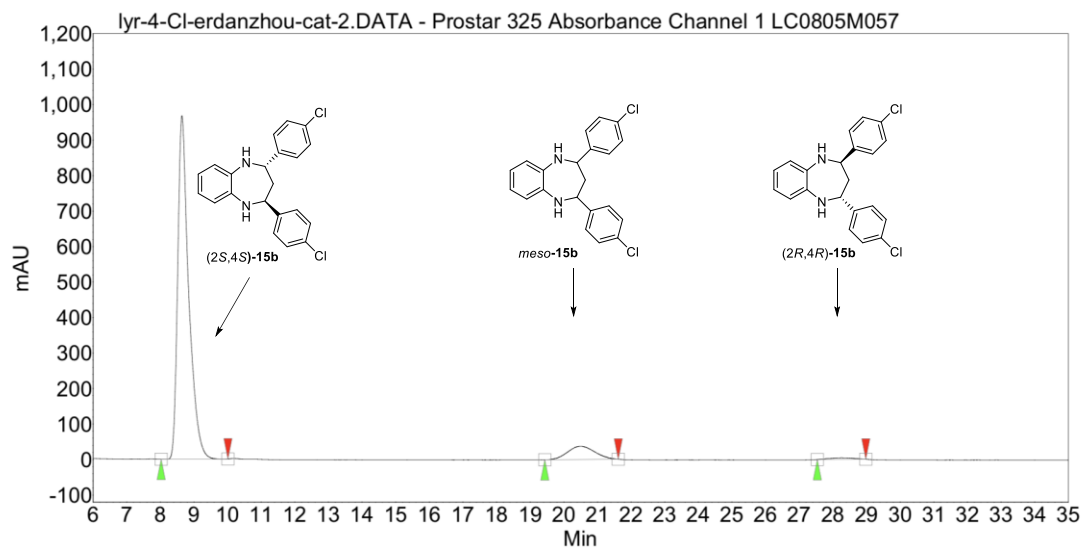

| Index | 文件名 | 时间<br>[Min] | 数量<br>[% 面积] | 高度<br>[mAU] | Area<br>[mAU.Min] | Area %<br>[%] |
|-------|-----|-------------|--------------|-------------|-------------------|---------------|
| 1     | 未知  | 8.64        | 90.42        | 967.9       | 366.2             | 90.417        |
| 2     | 未知  | 20.49       | 8.65         | 37.4        | 35.0              | 8.647         |
| 3     | 未知  | 28.26       | 0.94         | 4.6         | 3.8               | 0.936         |
| Total |     |             | 100.00       | 1010.0      | 405.0             | 100.000       |

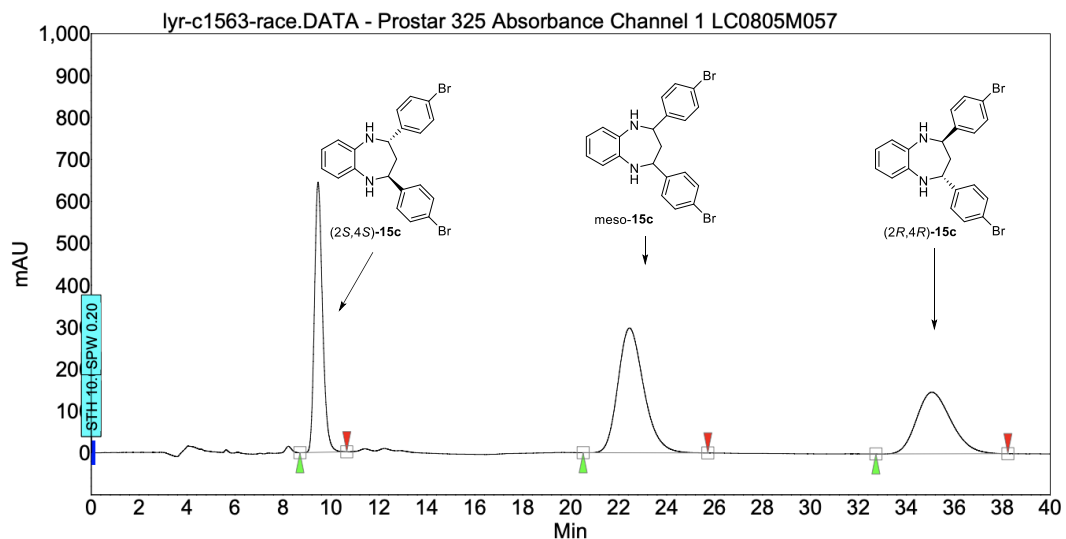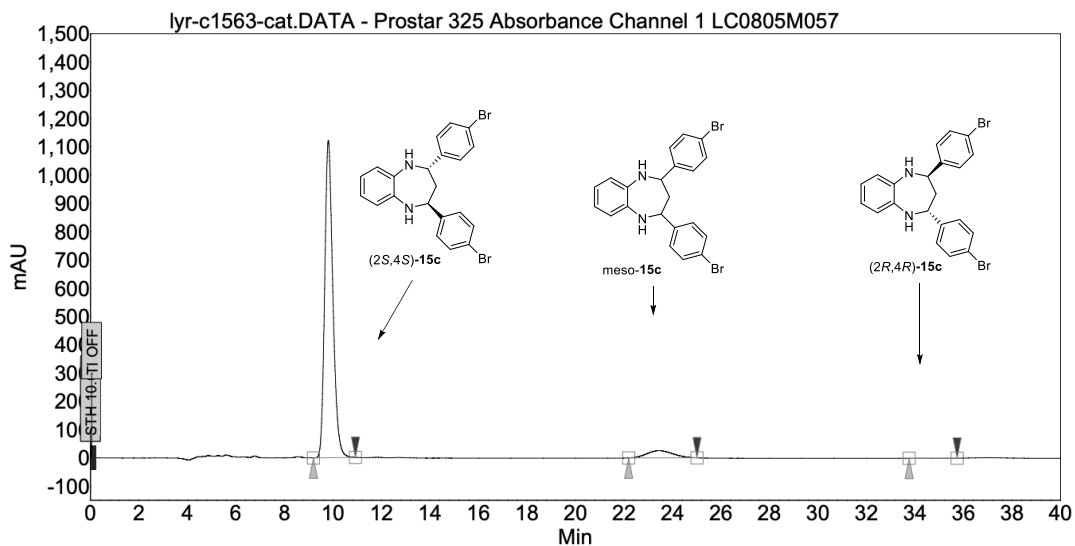

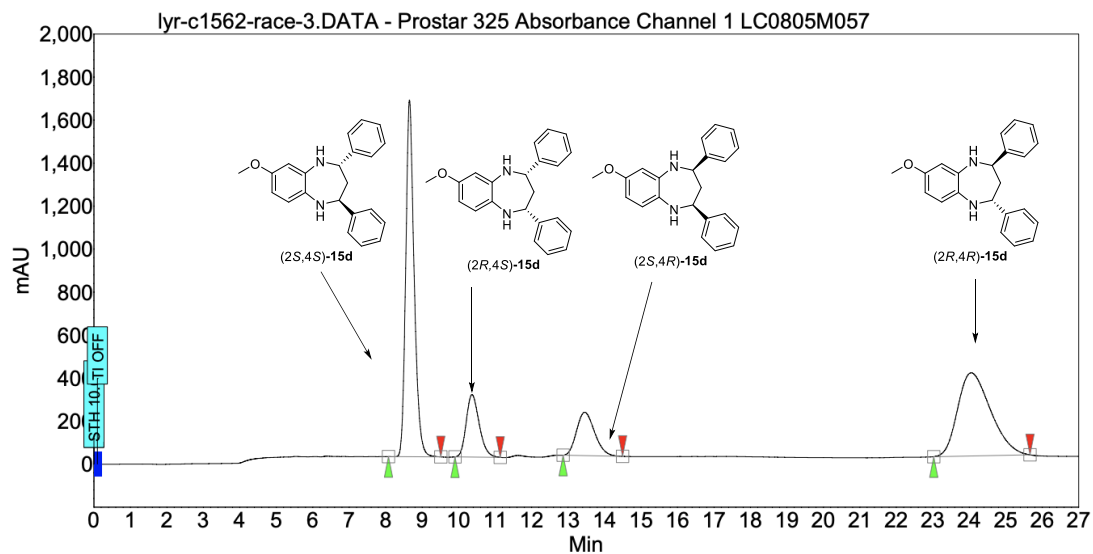

| Index | 文件名 | 时间<br>[Min] | 数量<br>[% 面积] | 高度<br>[mAU] | Area<br>[mAU.Min] | Area %<br>[%] |
|-------|-----|-------------|--------------|-------------|-------------------|---------------|
| 1     | 未知  | 8.65        | 40.84        | 1658.6      | 441.9             | 40.841        |
| 3     | 未知  | 10.37       | 11.10        | 290.5       | 120.1             | 11.096        |
| 4     | 未知  | 13.45       | 10.70        | 201.8       | 115.7             | 10.696        |
| 2     | 未知  | 24.05       | 37.37        | 386.9       | 404.3             | 37.368        |
| Total |     |             | 100.00       | 2537.9      | 1082.0            | 100.000       |

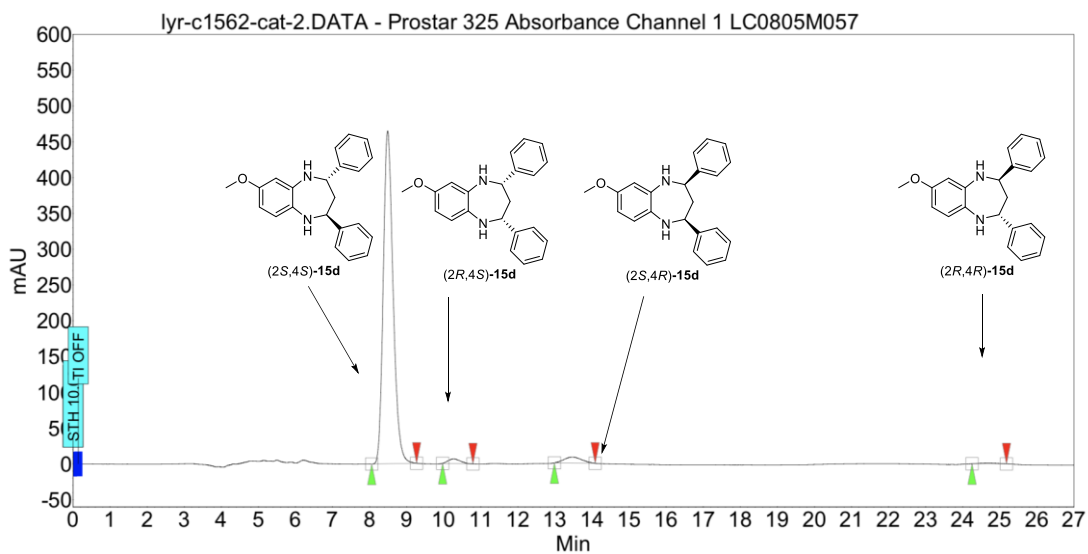

| Index | 文件名 | 时间<br>[Min] | 数量<br>[% 面积] | 高度<br>[mAU] | Area<br>[mAU.Min] | Area %<br>[%] |
|-------|-----|-------------|--------------|-------------|-------------------|---------------|
| 1     | 未知  | 8.49        | 94.85        | 464.9       | 142.4             | 94.850        |
| 2     | 未知  | 10.27       | 1.64         | 6.4         | 2.5               | 1.638         |
| 3     | 未知  | 13.48       | 3.08         | 8.3         | 4.6               | 3.077         |
| 4     | 未知  | 24.68       | 0.43         | 1.1         | 0.7               | 0.435         |
| Total |     |             | 100.00       | 480.7       | 150.2             | 100.000       |



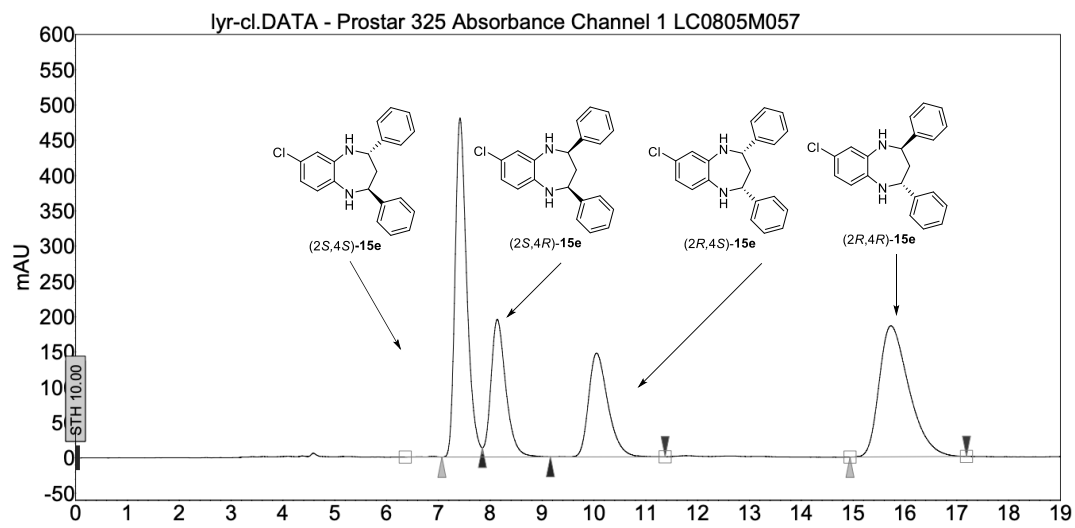

| Index | 文件名 | 时间<br>[Min] | 数量<br>[% 面积] | 高度<br>[mAU] | Area<br>[mAU.Min] | Area %<br>[%] |
|-------|-----|-------------|--------------|-------------|-------------------|---------------|
| 1     | 未知  | 7.41        | 33.28        | 480.2       | 125.7             | 33.275        |
| 2     | 未知  | 8.13        | 17.19        | 195.0       | 64.9              | 17.187        |
| 3     | 未知  | 10.05       | 16.81        | 147.0       | 63.5              | 16.812        |
| 4     | 未知  | 15.73       | 32.73        | 185.7       | 123.7             | 32.725        |
| Total |     |             | 100.00       | 1007.9      | 377.9             | 100.000       |

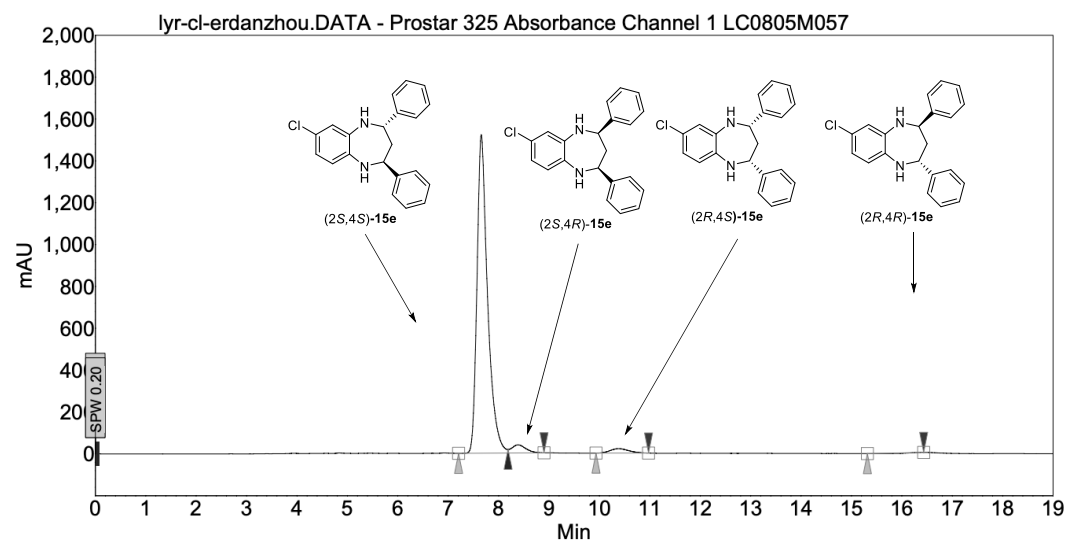

| Index | 文件名 | 时间<br>[Min] | 数量<br>[% 面积] | 高度<br>[mAU] | Area<br>[mAU.Min] | Area %<br>[%] |
|-------|-----|-------------|--------------|-------------|-------------------|---------------|
| 1     | 未知  | 7.65        | 94.12        | 1521.8      | 370.7             | 94.119        |
| 2     | 未知  | 8.39        | 3.19         | 38.8        | 12.6              | 3.193         |
| 3     | 未知  | 10.38       | 2.34         | 21.3        | 9.2               | 2.336         |
| 4     | 未知  | 15.90       | 0.35         | 2.5         | 1.4               | 0.352         |
| Total |     |             | 100.00       | 1584.4      | 393.9             | 100.000       |

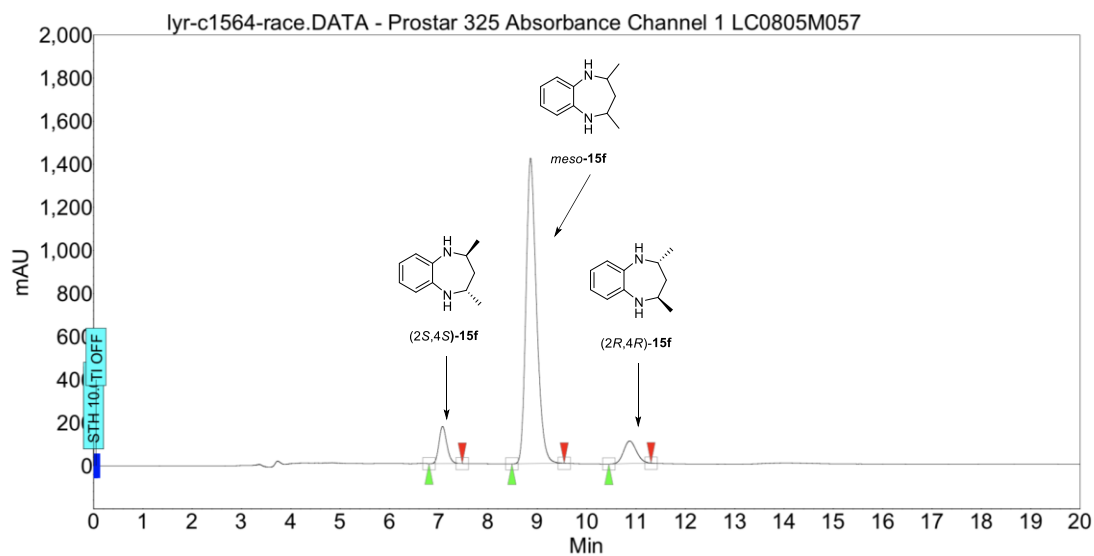

| Index | 文件名 | 时间<br>[Min] | 数量<br>[% 面积] | 高度<br>[mAU] | Area<br>[mAU.Min] | Area %<br>[%] |
|-------|-----|-------------|--------------|-------------|-------------------|---------------|
| 1     | 未知  | 7.07        | 7.80         | 173.3       | 32.3              | 7.798         |
| 2     | 未知  | 8.86        | 84.59        | 1419.2      | 349.9             | 84.589        |
| 3     | 未知  | 10.87       | 7.61         | 104.9       | 31.5              | 7.614         |
| Total |     |             | 100.00       | 1697.3      | 413.7             | 100.000       |

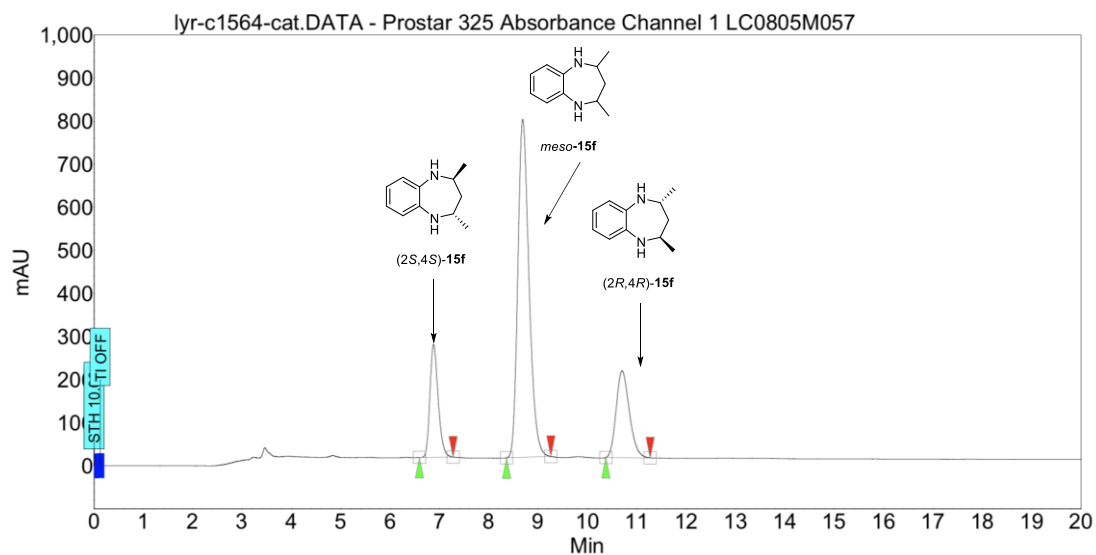

| Index | 文件名 | 时间<br>[Min] | 数量<br>[% 面积] | 高度<br>[mAU] | Area<br>[mAU.Min] | Area %<br>[%] |
|-------|-----|-------------|--------------|-------------|-------------------|---------------|
| 1     | 未知  | 6.88        | 15.89        | 262.4       | 50.6              | 15.889        |
| 2     | 未知  | 8.69        | 64.57        | 784.9       | 205.7             | 64.567        |
| 3     | 未知  | 10.70       | 19.54        | 201.4       | 62.3              | 19.544        |
| Total |     |             | 100.00       | 1248.7      | 318.6             | 100.000       |
